# Supplementary material for: JAK2V617F Myeloproliferative Neoplasms Support Parallel Evolution of Independent Leukemic Clones
Source: bioRxiv preprint, doi:10.1101/2025.09.23.678057, version 1 (2025-09-25)
Supplement: Data S1 [file 678057_file03.xlsx]

## Sheet: Read_Me
Data Supplementary 1- Gene expression analysis of HSPCs by RNA-seq
The explanation of each sheet is below.
Downregulated in Tet2-mutant HSPCs_1 (Down_1)	Decrease in Tet2-mutant HSPCs isolated from Jak2 host vs Tet2-mutant HSPCs isolated from WT host with p-value <0.05, Fold Change <-1.5
Upregulated in Tet2-mutant HSPCs_1 (Up_1)	Increase in Tet2-mutant HSPCs isolated from Jak2 host vs Tet2-mutant HSPCs isolated from WT host with p-value <0.05, Fold Change >1.5
Downregulated in Tet2-mutant HSPCs_2 (Down_2)	Decrease in Tet2-mutant HSPCs isolated from Jak2 host vs WT HSPCs isolated from Jak2 host with p-value <0.05, Fold Change <-1.5
Upregulated in Tet2-mutant HSPCs_2 (Up_2)	Increase in Tet2-mutant HSPCs isolated from Jak2 host vs WT HSPCs isolated from Jak2 host with p-value <0.05, Fold Change >1.5
Downregulated in WT HSPCs (Down_3)	Decrease in WT HSPCs isolated from Jak2 host vs WT HSPCs isolated from WT host with p-value <0.05, Fold Change <-1.5
Upregulated in WT HSPCs (UP_3)	Increase in WT HSPCs isolated from Jak2 host vs WT HSPCs isolated from WT host with p-value <0.05, Fold Change >1.5

## Sheet: All_Gene_CPM
ensembl_gene_id	Gene_Symbol	WT_Test_WT_Host_1	WT_Test_WT_Host_2	WT_Test_WT_Host_3	WT_Test_WT_Host_4	Tet2_Test_WT_Host_1	Tet2_Test_WT_Host_2	Tet2_Test_WT_Host_3	Tet2_Test_WT_Host_4	WT_Test_Jak2_Host_1	WT_Test_Jak2_Host_2	WT_Test_Jak2_Host_3	WT_Test_Jak2_Host_4	Tet2_Test_Jak2_Host_1	Tet2_Test_Jak2_Host_2	Tet2_Test_Jak2_Host_3	Tet2_Test_Jak2_Host_4
ENSMUSG00000000001	Gnai3	315.891	275.987	253.096	234.562	276.863	295.005	257.652	221.395	319.787	302.566	228.152	245.495	269.124	218.425	248.632	221.309
ENSMUSG00000000003	Pbsn	0	0	0	0	0	0	0	0	0	0	0	0	0	0	0	0
ENSMUSG00000000028	Cdc45	78.2509	78.5195	98.3488	84.4806	70.7575	70.0037	101.365	103.444	85.4943	70.6023	96.7647	89.8172	71.2123	71.9213	91.4092	96.4133
ENSMUSG00000000031	H19	0.0473292	0.0191698	0.0357177	0	0	0	0.0654812	0.0175418	0.020934	0.071988	0.0171995	0	0.0147927	0	0.0177253	0
ENSMUSG00000000037	Scml2	1.16745	3.8723	2.33951	3.84003	1.10588	1.5027	0	2.82423	2.32367	0	1.70276	2.03694	2.20412	1.68378	4.28951	2.72374
ENSMUSG00000000049	Apoh	0	0	0	0	0	0	0.0327406	0	0	0	0.0343991	0	0	0.0300674	0	0
ENSMUSG00000000056	Narf	47.7394	75.874	76.3288	75.897	65.2469	46.4736	11.8685	79.6748	59.8921	79.9607	54.729	61.0639	57.1888	55.5195	73.5421	64.6844
ENSMUSG00000000058	Cav2	16.0288	10.4475	7.53644	6.62593	7.62869	6.54223	41.1549	4.78891	13.9211	6.89285	5.17706	6.47983	18.6093	6.19389	5.77844	6.38546
ENSMUSG00000000078	Klf6	52.0779	41.6751	34.3069	47.0592	36.0442	38.1538	210.555	31.0665	32.5942	51.0215	29.4628	24.5614	68.52	51.7461	28.839	37.014
ENSMUSG00000000085	Scmh1	38.6679	57.2218	58.7021	73.2052	57.1309	37.2376	12.3596	69.2024	49.3832	53.865	53.7314	54.156	59.6443	44.1089	62.3397	47.5302
ENSMUSG00000000088	Cox5a	217.572	120.616	144.228	112.434	120.503	151.919	154.372	135.545	125.876	125.223	147.056	127.929	140.945	126.855	142.83	141.057
ENSMUSG00000000093	Tbx2	0.0157764	0	0	0.150589	0.0187437	0.0366511	0.0654812	0	0.942028	0	0	0	0.384611	0	0	0.0360761
ENSMUSG00000000094	Tbx4	0	0.402566	0	0	0	1.15451	0.0327406	0.0175418	0	2.93351	0.39559	0	0.177513	0	0	0.0360761
ENSMUSG00000000103	Zfy2	0	0	0	0	0	0	0	0	0	0	0	0	0	0	0.0354505	0
ENSMUSG00000000120	Ngfr	0.126211	0	0.0714355	0.169413	0	0.0183256	0	0	0	0	0.0515986	0	0.0147927	0	0.106352	0.27057
ENSMUSG00000000125	Wnt3	0	0	0	0	0	0	0.0327406	0	0	0	0	0	0	0	0	0
ENSMUSG00000000126	Wnt9a	0.126211	0	0	0.847065	0	0	0.671182	0.0701672	0.10467	1.94368	0	0.0295209	0.133135	0	0	0.0541141
ENSMUSG00000000127	Fer	5.44285	9.27818	6.57206	10.6354	7.36628	4.34316	12.3432	4.96433	7.34782	6.65889	10.0445	9.24003	13.8756	6.04356	12.2836	9.92092
ENSMUSG00000000131	Xpo6	196.779	270.007	267.329	236.143	229.311	204.972	66.1851	227.447	169.23	198.687	254.725	239.148	242.926	214.907	315.084	219.631
ENSMUSG00000000134	Tfe3	60.3289	45.2215	43.7542	56.0569	40.1303	44.7144	104.459	66.0448	43.9404	49.4018	55.3481	41.2849	55.4284	68.8995	47.0428	59.9043
ENSMUSG00000000142	Axin2	0.489068	0.690112	0.678637	0.960007	1.36829	0.568093	0.114592	0.0701672	0.711755	0.485919	0.171995	0.0738022	0.502953	0.947124	0.584934	1.11836
ENSMUSG00000000148	Brat1	71.8457	110.092	98.3667	83.8971	102.828	125.548	9.51115	92.4979	132.198	86.9975	89.9364	94.7177	102.987	128.027	65.2467	109.888
ENSMUSG00000000149	Gna12	141.388	153.473	202.698	174.062	183.951	202.058	131.683	204.66	172.182	177.81	174.782	149.11	127.262	164.679	228.053	213.047
ENSMUSG00000000154	Slc22a18	7.6831	11.7319	5.50053	3.61414	8.41593	16.9328	1.37511	7.66576	8.20611	8.90852	4.40308	7.92635	16.1093	14.703	2.81832	6.98072
ENSMUSG00000000157	Itgb2l	0.0157764	0	0	0.451768	0	0	0	13.5072	0	1.45776	4.17949	0.147604	0	0.0300674	0	2.97628
ENSMUSG00000000159	Igsf5	0	0	0.142871	0	0	0	0	0.210501	0	0	0	0	0	0	0	0.0360761
ENSMUSG00000000167	Pih1d2	0.804596	0.95849	0.750073	1.24236	0.318643	0.549767	6.36805	0.666588	0.921094	0.035994	1.28997	2.25835	1.73075	0.0601349	0.974889	0.432913
ENSMUSG00000000168	Dlat	90.3987	105.99	135.852	147.295	94.1122	92.6724	64.9246	146.263	108.94	96.5719	144.012	122.128	98.7416	103.537	123.917	110.735
ENSMUSG00000000171	Sdhd	422.097	375.019	340.854	287.437	426.532	410.163	595.437	339.486	433.877	346.1	373.643	354.752	392.244	393.778	273.359	352.571
ENSMUSG00000000182	Fgf23	0	0	0	0.0376473	0	0	0.0163703	0	0	0	0	0	0	0	0	0
ENSMUSG00000000183	Fgf6	0.0157764	0	0	0	0.0187437	0	0	0	0	0	0.0171995	0.0147604	0	0.0300674	0.0177253	0.0721521
ENSMUSG00000000184	Ccnd2	227.227	251.182	314.334	320.567	277.107	268.47	155.813	290.071	252.799	269.361	363.117	308.965	247.675	295.262	310.582	322.61
ENSMUSG00000000194	Gpr107	42.9591	44.4356	46.0402	29.5908	45.3598	35.515	52.2704	36.6799	49.8228	50.3916	35.4999	44.4289	64.8662	45.4469	41.8848	37.6634
ENSMUSG00000000197	Nalcn	0.0631056	0	0.0357177	0	0	0	1.09681	0	0	0	0	0	0.059171	0.0300674	0	0
ENSMUSG00000000202	Btbd17	0.0946583	0	0	0	0	0	0.0327406	0	0	0	0	0.0147604	0.147927	0	0.070901	0
ENSMUSG00000000204	Slfn4	1.00969	0.095849	0.357177	0.677652	0.224925	0.238232	5.30398	0.421003	0.481481	0.35994	0.412789	0.487094	0.946736	0.52618	0.549483	0.505065
ENSMUSG00000000214	Th	0	0	0	0	0	0	0	0	0	0	0	0	0.0147927	0	0	0
ENSMUSG00000000215	Ins2	0	0	0	0	0	0	0	0	0.020934	0	0	0	0	0	0	0.0360761
ENSMUSG00000000216	Scnn1g	0	0	0	0	0	0	0	0.0175418	0	0	0	0	0	0	0	0.0360761
ENSMUSG00000000223	Drp2	0	0	0.0178589	0.056471	0	0.0183256	0.147333	0	0.020934	0.017997	0	0	0.0739637	0.0451012	0	0.198418
ENSMUSG00000000244	Tspan32	397.628	505.335	307.887	304.51	444.226	519.475	424.842	335.662	416.397	396.654	319.808	360.287	407.836	390.065	262.866	299.54
ENSMUSG00000000247	Lhx2	0.0315528	0	0	0	0	0	0	0	0.0837359	0	0	0	0	0	0	0
ENSMUSG00000000248	Clec2g	0.0631056	0	0.0178589	0.0188237	0.0374874	0.0366511	0	0.105251	0.020934	0.107982	0.0515986	0.0147604	0.0443782	0.0601349	0.0886263	0.0360761
ENSMUSG00000000253	Gmpr	94.2166	98.0151	66.1314	71.417	82.5848	77.9203	50.1259	73.4826	108.229	92.4326	75.592	69.994	82.6471	85.617	57.6603	64.5942
ENSMUSG00000000263	Glra1	0.0157764	0.095849	0	0.056471	0.0187437	0.0183256	0	0	0.020934	0	0	0	0.059171	0.0150337	0	0.0360761
ENSMUSG00000000266	Mid2	1.34099	0.88181	0	2.22119	0	0.0183256	0.55659	0.105251	1.08857	5.20113	0.791179	0	0.695259	1.84915	0.0177253	0.018038
ENSMUSG00000000275	Trim25	75.9318	72.2701	80.2756	87.3794	69.2393	69.0141	105.752	40.311	60.1433	82.1743	62.486	62.0971	75.2507	75.8602	62.9247	91.6873
ENSMUSG00000000276	Dgke	6.42099	10.39	10.6796	14.0989	8.26598	5.14949	7.02286	4.40299	15.5749	3.99534	9.52855	8.29536	6.9378	5.86315	9.34121	7.23325
ENSMUSG00000000278	Scpep1	79.4026	38.608	39.5038	50.5039	44.2539	41.7273	362.504	46.784	36.4879	40.2953	33.8659	29.9046	63.4313	69.1551	30.4875	48.5043
ENSMUSG00000000282	Mnt	32.5467	36.6526	32.1281	32.1508	29.7088	34.3971	20.7739	36.6448	28.2399	31.8367	21.9466	26.3031	38.3428	39.6439	42.3634	34.3444
ENSMUSG00000000290	Itgb2	169.233	56.0525	65.7742	101.987	63.9911	66.1187	708.752	105.935	64.8953	68.9465	52.7338	68.3556	143.43	129.936	80.4904	125.292
ENSMUSG00000000295	Hddc2	36.9956	36.576	28.2706	24.9978	28.9028	43.7798	37.6681	29.5579	43.103	33.6004	34.1583	34.8494	40.5469	33.2847	31.0724	30.5564
ENSMUSG00000000296	Tpd52l1	0	0.306717	0	0	0	0	0	0.368378	0.628019	0	0.687982	0.35425	1.13904	0.0601349	0.0354505	0.360761
ENSMUSG00000000301	Pemt	6.65764	12.4604	7.10783	3.52003	6.54156	11.0137	0.883996	11.5951	9.69243	17.6551	9.02976	12.1774	9.28984	17.6045	6.78878	8.29749
ENSMUSG00000000303	Cdh1	1.60919	1.47607	1.12511	4.66827	0.168693	0.0183256	4.7965	0.140334	3.2029	0.017997	0.0171995	2.18454	0.310648	0.210472	2.57016	2.66963
ENSMUSG00000000305	Cdh4	0.0157764	0.287547	0	0	0.0187437	0.0549767	0.638442	0	0.020934	0	0	0	0.177513	0	0	0
ENSMUSG00000000308	Ckmt1	0.157764	0.115019	0.0714355	0.0376473	0	0	1.29325	0.105251	0.0837359	0	0.0171995	0	0.0739637	0.691551	0.070901	0.18038
ENSMUSG00000000317	Bcl6b	1.45143	0.728452	0.500048	0.0188237	0.0562312	0	0.0327406	0	0.355877	2.96951	0	1.04799	2.84021	0.0300674	0.124077	0
ENSMUSG00000000318	Clec10a	7.55689	11.6552	7.30428	5.21415	9.59678	4.34316	1.37511	4.85908	4.52174	9.97034	5.48666	4.08864	6.68632	9.54641	2.76514	4.85223
ENSMUSG00000000320	Alox12	1.4672	0.0191698	1.17869	0.169413	0.318643	2.69386	0.0654812	0	0.774557	2.95151	0.189195	1.72697	0.0887565	0.0150337	0.0354505	1.06424
ENSMUSG00000000325	Arvcf	15.5397	30.3074	17.1267	10.1648	24.5918	28.0564	2.63562	22.4184	22.4621	37.4518	22.2046	36.4583	38.5943	28.1732	19.2851	14.1599
ENSMUSG00000000326	Comt	109.819	120.31	137.12	135.38	107.42	116.771	82.1462	152.052	119.868	123.963	132.54	142.468	124.496	119.668	129.891	125.346
ENSMUSG00000000339	Rtca	94.6268	83.8103	79.722	59.5581	84.6654	92.3792	46.7863	71.9038	99.3107	87.9694	70.5181	73.2117	76.5525	80.3552	78.8597	57.1986
ENSMUSG00000000340	Dbt	12.9366	11.9236	18.984	16.9225	10.0841	4.30651	4.81287	13.4546	6.51046	10.9602	15.1012	12.4726	8.12122	7.6221	14.5879	14.8453
ENSMUSG00000000346	Dazap2	668.619	807.777	612.041	585.378	817.17	820.582	1991.07	714.267	811.673	831.984	716.069	790.037	821.16	836.386	671.451	625.433
ENSMUSG00000000355	Mcts1	56.7161	29.9624	43.7007	40.3015	38.3684	41.1409	49.5529	38.9779	37.6602	39.3774	42.2421	51.9715	50.9018	38.3059	45.873	45.1131
ENSMUSG00000000359	Rem1	0.457515	0	0	0.0752947	0	0.0733023	1.66977	0.0877089	0.146538	0.107982	0	0	0.355026	0.150337	0.0886263	0.342723
ENSMUSG00000000365	Rnf17	0.978136	0.287547	7.23284	0	1.23709	0.806325	0.622072	0.0701672	0.795491	0.107982	0.859977	1.23988	0.0887565	0.0601349	2.65879	2.7057
ENSMUSG00000000374	Trappc10	13.8832	17.7896	16.3051	34.0332	18.6125	11.6734	23.1476	16.6647	13.0419	9.05249	16.0128	14.5685	21.0501	11.8766	26.003	42.8944
ENSMUSG00000000378	Ccm2	128.94	173.736	130.173	115.897	137.86	168.284	155.469	165.735	129.812	152.201	116.149	119.559	140.516	137.859	110.003	107.867
ENSMUSG00000000381	Wap	0	0	0	0.0188237	0	0.0183256	0	0	0	0	0	0.0147604	0	0	0	0
ENSMUSG00000000384	Tbrg4	19.3103	20.7801	31.4138	29.2896	27.5158	35.0018	23.7861	38.6446	24.3462	21.4344	20.7255	16.9007	19.8962	27.5418	34.9542	49.7128
ENSMUSG00000000385	Tmprss2	0	0.115019	0	0	0	0	0	0	0.0418679	0	0	0.0147604	0.059171	0	0	0.144304
ENSMUSG00000000386	Mx1	3.48658	0.0383396	1.53586	1.20471	0.112462	0.109953	11.0827	3.06981	0.418679	0.341943	0.275193	0	1.24259	1.338	0.567208	0.559179
ENSMUSG00000000392	Fap	0	0.0191698	0.410754	0	0	0	0	0	0	2.17764	0	0	0	1.56351	0	0.721521
ENSMUSG00000000394	Gcg	0	0	0	0	0	0	0	0	0	0	0	0	0.059171	0	0	0
ENSMUSG00000000399	Ndufa9	299.247	222.849	188.411	174.251	223.969	272.391	393.853	169.629	236.742	195.214	195.989	190.867	226.285	222.274	193.134	196.957
ENSMUSG00000000402	Egfl6	0.0157764	0	0	0.0376473	0.0374874	0	0	0	0.020934	0	0	0	0.0147927	0.0601349	0	0
ENSMUSG00000000409	Lck	41.3657	38.8763	18.4125	19.4072	16.8693	43.285	14.6514	13.0335	30.9195	35.0762	19.0227	27.6463	26.9524	14.1618	11.2733	4.92438
ENSMUSG00000000411	Tssk3	0	0	0	0	0.299899	0	0	0	0.020934	0.017997	0.0171995	0	0	0	0	0.0360761
ENSMUSG00000000416	Cttnbp2	0.0157764	0	0	0	0	0	0.0654812	0	0	0	0	0	0	0	0	0
ENSMUSG00000000420	Galnt1	297.369	295.867	326.424	295.437	270.191	260.553	184.084	312.174	311.497	330.155	326.74	374	314.849	298.525	357.589	330.836
ENSMUSG00000000435	Myf5	0	0	0	0	0	0	0	0	0	0	0	0	0	0	0	0
ENSMUSG00000000439	Mkrn2	59.5559	54.8448	59.4165	48.0568	53.4758	67.3465	37.3079	73.8334	50.3881	50.1217	58.1345	58.2299	59.2449	65.2313	52.1123	49.2799
ENSMUSG00000000440	Pparg	3.95987	0.92015	0.857226	1.16707	0.50608	0.16493	18.6785	1.08759	1.08857	0.467922	1.66836	1.40224	3.31357	2.48056	0.354505	4.81615
ENSMUSG00000000441	Raf1	55.7064	72.2893	79.0612	74.1276	67.7211	78.1036	38.2247	75.0789	64.5394	54.9449	76.1424	67.7209	81.3157	70.5081	57.8021	73.7214
ENSMUSG00000000486	Septin1	97.8609	119.025	85.8119	100.857	127.195	143.489	173.05	87.7089	129.246	127.383	83.349	96.2232	163.726	154.727	69.9971	83.9851
ENSMUSG00000000489	Pdgfb	5.3482	0.555924	1.46443	1.93884	0.224925	4.17823	14.4386	3.50836	2.59581	1.34978	2.76913	1.66793	1.56803	1.83411	3.59823	0.577217
ENSMUSG00000000530	Acvrl1	10.2231	0.90098	5.67912	4.06591	2.49291	1.31944	27.7313	2.33306	2.0934	3.5994	0.687982	0.0885626	5.93189	4.88596	0.815362	3.12058
ENSMUSG00000000531	Grasp	11.4537	15.7959	8.21508	10.6354	16.0821	14.4772	10.3788	10.5602	14.905	17.925	12.9169	13.5501	15.1921	12.3728	5.29985	7.81047
ENSMUSG00000000532	Acvr1b	9.00832	2.30037	6.21489	5.79769	2.66161	1.74093	3.1431	8.4376	4.52174	2.03366	2.37354	6.37651	7.57389	5.05133	3.70458	3.75191
ENSMUSG00000000538	Tom1l2	30.7324	40.0265	44.6293	57.9016	23.842	46.3087	12.2122	42.3459	37.5765	49.8337	34.0895	35.5726	28.2985	29.5563	42.452	36.0941
ENSMUSG00000000544	Gpa33	0	0	0	0	0	0.0366511	0	0	0	0.035994	0	0	0	0.0601349	0.0354505	0
ENSMUSG00000000552	Zfp385a	50.5318	78.4236	54.666	76.01	81.9288	52.5211	19.4643	42.9598	72.6409	71.916	44.736	57.669	61.8485	68.1178	59.7164	62.6461
ENSMUSG00000000555	Itga5	108.273	112.431	115.672	97.9019	125.377	89.6304	92.8851	92.7434	96.7568	122.596	91.6048	114.26	95.0878	84.2039	102.31	108.878
ENSMUSG00000000560	Gabra2	0.157764	0	0	0.0376473	0	0	0	0	0.0418679	0	0	0	0	0	0.0354505	0
ENSMUSG00000000561	Wdr77	88.2847	93.7786	69.3281	86.0241	97.4486	89.0623	81.2294	80.0256	91.4814	85.6477	79.2555	74.4073	82.8985	82.5502	73.2231	71.3945
ENSMUSG00000000562	Adora3	0.110435	0.134189	0.0892944	0.97883	0.168693	0.604744	2.76658	0	0.439613	0.71988	0.0343991	0	0.42899	0.12027	0	0.198418
ENSMUSG00000000562	Adora3	0.110435	0.134189	0.0892944	0.97883	0.168693	0.604744	2.76658	0	0.439613	0.71988	0.0343991	0	0.42899	0.12027	0	0.198418
ENSMUSG00000000563	Atp5pb	401.02	334.915	305.655	294.402	325.635	355.351	477.669	302.999	355.815	334.762	339.003	369.483	368.517	308.522	298.263	292.216
ENSMUSG00000000567	Sox9	0.157764	0	0	0.150589	0	0.146605	1.03133	0	0.125604	0	0.0171995	0	0.0295855	0	0.0354505	0
ENSMUSG00000000568	Hnrnpd	232.591	215.794	244.006	265.734	225.262	221.758	158.694	208.116	257.53	228.49	252.197	236.477	222.261	216.17	224.526	230.328
ENSMUSG00000000579	Dynlt1c	6.0108	6.82445	6.51849	5.44004	7.25382	6.78046	11.0827	5.99929	6.21739	7.46876	5.58985	6.14034	6.55319	6.13376	5.90251	5.24907
ENSMUSG00000000581	C1d	105.923	84.9222	70.1496	66.9558	80.6917	76.8941	143.977	62.6593	87.6924	85.0718	71.9629	84.9315	98.1203	69.8467	58.2807	65.2436
ENSMUSG00000000594	Gm2a	512.228	608.353	444.739	401.866	605.478	556.786	348.147	471.558	518.513	571.045	451.987	426.281	453.901	566.2	486.293	415.668
ENSMUSG00000000600	Krit1	42.3281	45.6816	60.988	56.9604	30.6085	36.871	21.7398	53.4849	44.8615	33.0605	47.5739	77.4775	46.9374	40.6361	28.6263	36.3106
ENSMUSG00000000605	Clcn4	73.5653	86.2641	68.2209	69.0828	63.2226	72.5509	43.2176	69.4655	74.5458	78.9709	64.6703	85.1234	72.514	74.7477	63.4387	54.0419
ENSMUSG00000000606	Vmn2r88	0	0	0	0	0	0	0	0	0	0	0	0	0	0	0	0
ENSMUSG00000000617	Grm6	0.220869	0.0766792	1.03581	0	0.50608	0	0.360147	0.0175418	0	0	0.137596	0.0295209	0	0	0	0
ENSMUSG00000000627	Sema4f	0.315528	0.402566	0.0178589	0.0376473	0.95593	0	0.0163703	0.0350836	0.020934	1.02583	0.0171995	0.0442813	0.0147927	0.556248	2.12703	0.0721521
ENSMUSG00000000628	Hk2	35.9386	24.2306	58.2556	32.3579	54.9941	33.9756	20.8394	25.1725	55.7262	38.9995	41.3133	33.6538	29.1269	26.1136	58.4756	45.997
ENSMUSG00000000631	Myo18a	146.736	205.5	189.822	259.785	195.085	141.199	52.2213	194.416	153.195	198.651	205.707	221.554	208.164	219.011	223.817	209.205
ENSMUSG00000000632	Sez6	0.189317	0	0.0714355	0	0.0187437	0.0549767	1.0477	0	0	0.035994	0.0171995	0	0.0147927	0.0902023	0	0.018038
ENSMUSG00000000673	Haao	35.4653	45.72	40.3075	28.932	43.3355	37.7324	2.58651	42.9072	37.8486	36.138	36.7726	28.0448	35.4138	38.9674	20.8804	31.8371
ENSMUSG00000000682	Cd52	71.2146	32.3394	68.5423	55.2475	56.8684	54.207	213.878	55.625	33.2013	44.0387	62.5892	56.1339	75.369	64.7352	53.6366	49.8571
ENSMUSG00000000686	Abhd15	24.4692	20.6075	16.8766	10.8613	26.4099	22.9803	8.8727	17.9803	22.6924	32.7006	14.138	28.1039	16.9377	17.7699	9.27031	14.9355
ENSMUSG00000000690	Hoxb6	0.599503	1.39939	0.428613	0.0752947	0.187437	0.806325	0.0163703	1.70155	0.523349	0.125979	0.171995	0.0590417	0.473368	0	0	0
ENSMUSG00000000693	Loxl3	6.42099	9.92995	4.7326	3.52003	2.86779	3.73842	32.0039	7.49034	4.52174	5.47109	4.79867	4.45765	9.45256	5.1265	3.45643	5.6459
ENSMUSG00000000701	Tcl1b5	0	0	0	0	0	0	0	0	0	0	0	0	0	0	0	0
ENSMUSG00000000706	Btn1a1	0.0157764	0.0191698	0	0	0.0374874	0.0183256	0	0	0.0837359	0.017997	0	0	0.103549	0	0	0
ENSMUSG00000000708	Kat2b	2.49267	2.45373	4.41114	10.033	7.72241	1.77758	0.851256	3.57853	6.4686	6.24496	4.67828	7.5721	3.50588	1.63868	5.97341	2.81393
ENSMUSG00000000711	Rab5b	41.7601	46.2375	38.468	44.5556	51.1891	47.28	29.0082	38.5042	49.9484	39.1075	26.0573	28.0596	45.0883	43.4174	37.4535	38.4751
ENSMUSG00000000724	Cryba1	0	0	0	0	0	0	0	0	0	0	0	0	0	0.0451012	0.0177253	0
ENSMUSG00000000730	Dnmt3l	0	0.0191698	0.196448	0.0752947	0.674774	0.201581	0	0	0.125604	0	0.137596	0	0.059171	0.0150337	0	0.018038
ENSMUSG00000000731	Aire	0.709938	0.95849	0.0178589	0.0188237	0.0187437	0.769674	0.0163703	0	0.481481	1.04383	0.103197	0.0147604	0	0.0150337	0	0
ENSMUSG00000000732	Icosl	3.09217	4.90747	3.69679	11.1813	4.94834	3.39023	3.04488	13.0686	3.93559	6.47892	7.20661	3.85247	11.8046	6.96061	2.81832	5.68198
ENSMUSG00000000738	Spg7	77.9827	109.21	100.438	119.38	87.8331	111.988	30.3014	119.6	82.731	77.8011	107.274	104.489	67.8543	78.1753	128.668	103.394
ENSMUSG00000000739	Sult5a1	0.0473292	0.230037	0	0	0.0374874	0.0183256	0.0491109	0	0.020934	0.089985	0.0171995	0.206646	0.0443782	0	0	0
ENSMUSG00000000740	Rpl13	1834.13	1848.56	1333.43	1281.4	1916.53	2129.03	717.969	1329.12	1592.97	1884.45	1297.57	1405.72	1649.83	1685.76	1403.93	1520.57
ENSMUSG00000000743	Chmp1a	173.43	188.497	164.73	164.801	183.97	214.299	208.836	169.226	214.845	162.801	188.696	208.683	175.057	190.357	197.832	166.996
ENSMUSG00000000751	Rpa1	306.614	326.232	324.853	329.753	288.784	339.481	160.347	319.471	400.844	278.234	385.872	354.516	387.481	348.076	370.369	337.474
ENSMUSG00000000753	Serpinf1	78.6295	123.741	106.832	75.6711	180.165	189.303	50.8134	115.671	82.6682	103.213	115.478	65.6249	93.357	114.061	67.4269	127.475
ENSMUSG00000000759	Tubgcp3	69.8421	78.462	91.5446	85.2335	85.9774	76.0511	8.08693	71.588	77.1207	104.563	87.8037	59.4403	85.8423	76.9877	74.4284	61.672
ENSMUSG00000000766	Oprm1	0.0157764	0	0	0	0	0.0183256	0	0	0	0.035994	0	0	0.059171	0.105236	0	0
ENSMUSG00000000776	Polr3d	17.9062	26.3776	26.9133	23.266	11.6586	20.9461	9.20011	44.714	18.9871	15.6214	32.7823	33.1962	20.2809	16.4619	17.2112	31.1336
ENSMUSG00000000782	Tcf7	6.61031	4.61992	5.10764	4.9318	6.37286	7.71507	1.71888	12.788	0.0418679	2.3756	10.0789	2.27311	2.58873	8.82479	1.24077	0.0541141
ENSMUSG00000000787	Ddx3x	101.111	94.2195	125.78	148.519	90.3635	79.7712	90.3477	77.0611	93.4283	87.0875	115.065	149.11	95.7682	100.365	140.207	121.234
ENSMUSG00000000791	Il12rb1	24.8005	27.7003	12.3226	15.7931	30.9834	22.3938	1.62066	27.6985	35.818	36.7499	22.2218	15.277	22.914	35.7953	10.3161	16.3605
ENSMUSG00000000792	Slc5a5	0.252422	0.0575094	0	0.0376473	0.0374874	0.0366511	0	0.0350836	0.10467	0.053991	0	0	0.118342	0.12027	0.0531758	0.0360761
ENSMUSG00000000794	Kcnn3	0.141988	0	0	0.0376473	0.0562312	0.0366511	0.0491109	0.0350836	0.020934	0.089985	0.0343991	0.0147604	0.0887565	0.0601349	0.0354505	0.018038
ENSMUSG00000000804	Usp32	6.72074	8.01297	11.9119	17.9954	9.50307	7.73339	16.1739	12.2793	5.25443	8.08066	4.76427	9.6238	12.633	2.13479	15.2437	12.8611
ENSMUSG00000000805	Car4	0.0157764	0	0	0	0	0	0.0327406	0	0.0418679	0	0	0	0	0	0	0
ENSMUSG00000000811	Txnrd3	51.573	41.1575	39.2895	32.8285	51.8076	46.2721	7.87412	16.6647	45.9082	47.3141	34.4507	37.6391	43.1061	62.3599	36.7445	31.9634
ENSMUSG00000000817	Fasl	0	0	0	0	0	0.0183256	0	0	0	0	0	0	0	0.0601349	0	0
ENSMUSG00000000823	Zfp512b	23.4595	61.2283	51.5764	62.5134	43.4105	37.2559	20.8558	41.2758	34.7294	54.9988	32.0084	30.746	49.393	27.632	45.7312	34.9216
ENSMUSG00000000826	Dnajc5	91.1718	114.424	161.391	142.382	112.162	65.5872	69.3282	134.142	112.499	97.7777	122.014	130.217	110.694	105.672	118.174	132.129
ENSMUSG00000000827	Tpd52l2	122.377	123.358	125.744	119.982	110.494	123.349	87.1391	142.527	127.969	113.957	120.93	132.357	132.01	110.859	118.44	109.906
ENSMUSG00000000838	Fmr1	32.1996	48.998	73.0071	65.8264	32.2767	28.5329	41.8261	50.5379	45.322	46.7022	53.869	41.034	57.0556	31.5407	49.3649	40.9463
ENSMUSG00000000861	Bcl11a	96.0309	111.031	95.3128	106.09	112.781	91.5179	15.1098	79.8327	117.712	112.121	71.7565	78.3041	76.8187	88.7741	88.3959	104.35
ENSMUSG00000000869	Il4	1.43565	0.690112	0.392895	0.696476	0.524824	0.274884	0	0.543795	1.42351	2.10565	0.687982	1.57937	3.15085	1.60861	0.691285	1.08228
ENSMUSG00000000876	Pxmp4	45.3571	50.0715	36.3964	40.0568	51.5077	46.5836	38.1919	43.3282	41.533	42.5269	35.2935	49.7131	38.402	43.7481	43.7637	35.3185
ENSMUSG00000000881	Dlg3	34.4556	39.1447	33.2711	38.1367	39.3806	44.8427	18.0892	23.7165	25.1626	35.1661	31.3548	39.0118	45.4729	39.238	43.1965	37.5011
ENSMUSG00000000884	Gnb1l	22.2132	29.8474	18.5732	24.8661	21.1429	26.1506	9.03641	30.3648	26.4187	20.1926	24.9909	20.3842	19.7039	22.9565	19.2496	21.5554
ENSMUSG00000000889	Dbh	0	0	0	0	0	0.0183256	0.0163703	0	0	0.035994	0	0	0.0295855	0.0300674	0.0177253	0
ENSMUSG00000000901	Mmp11	3.59702	8.93312	4.66117	1.78825	8.88452	4.9479	0.278295	3.75394	1.00483	6.74888	1.75435	2.6864	3.03251	5.1265	1.77253	2.09241
ENSMUSG00000000902	Smarcb1	219.45	232.894	217.664	219.766	233.003	239.735	108.617	188.258	232.451	210.367	239.263	284.994	236.285	238.781	202.05	220.136
ENSMUSG00000000903	Vpreb3	0.347081	0.153358	0	0.244708	0.862211	0.32986	0	0	0.502415	0	0.137596	0.280448	1.59762	0.947124	0	0.0721521
ENSMUSG00000000915	Hip1r	65.5825	122.783	89.4015	85.083	101.928	78.0486	7.97234	96.9535	113.42	110.16	79.1351	85.4186	121.715	97.659	84.195	89.2702
ENSMUSG00000000916	Nsun5	64.2257	66.6342	69.221	61.1204	57.562	83.9494	52.123	75.8507	62.0901	59.5161	85.0174	73.7283	62.5585	87.8571	69.0044	69.4825
ENSMUSG00000000934	Top1mt	30.8428	25.4767	37.9144	33.1108	17.0193	26.7187	18.2529	27.9265	28.6586	18.8429	31.0108	21.3436	24.127	25.5122	16.2009	21.4653
ENSMUSG00000000938	Hoxa10	13.3153	22.1411	8.12579	8.433	15.2012	13.286	1.09681	2.47339	10.8647	9.46642	9.88974	13.9338	27.5589	15.4697	5.63663	1.6595
ENSMUSG00000000942	Hoxa4	0	0.249207	0.250024	0	0.599799	0.824651	0.0163703	0	1.08857	0.035994	0.240794	0.516615	0.946736	0	0.496307	1.60538
ENSMUSG00000000948	Gm38393	0	0	0	0	0	0	0	0	0	0	0	0	0.0887565	0	0	0
ENSMUSG00000000957	Mmp14	16.1077	7.11199	14.6621	16.0001	9.05322	7.40353	35.3107	7.19213	11.3043	7.55874	30.3916	22.4506	13.5502	19.0327	10.0857	31.6748
ENSMUSG00000000958	Slc7a7	10.1758	6.76694	6.07202	7.36005	6.35412	6.26735	26.3398	4.19249	6.09178	12.6699	6.29503	9.56476	10.0591	14.4173	3.26145	13.3662
ENSMUSG00000000959	Oxa1l	69.7001	66.3275	60.7737	47.078	63.2038	60.6393	25.685	69.8689	68.8727	56.8885	70.7245	74.673	60.6798	61.2774	69.9616	76.0844
ENSMUSG00000000976	Heatr6	44.1581	75.3948	76.4538	51.8027	67.9835	53.2541	25.6195	54.6251	59.8293	54.4229	64.6531	68.3851	57.0704	51.4003	57.8907	87.9174
ENSMUSG00000000982	Ccl3	9.26074	6.65192	3.62535	4.87533	4.64844	3.72009	48.4561	5.77125	7.45249	8.92651	4.60948	2.36167	11.0354	9.17057	3.226	5.46552
ENSMUSG00000000983	Wfdc18	1.70385	1.38022	0	0.131766	1.27457	0.696372	0.327406	0.245585	0.0418679	1.43976	0.309592	0.309969	1.65679	1.08243	0	0.306647
ENSMUSG00000001014	Icam4	0	0	0	0	0	0	0	0	0	0	0	0	0	0	0	0
ENSMUSG00000001016	Ilf2	206.576	189.992	185.982	202.505	212.048	177.776	100.923	185.276	218.781	191.236	234.361	234.292	194.096	186.779	186.948	186.603
ENSMUSG00000001017	Chtop	149.702	122.495	156.819	153.3	114.074	141.272	141.063	155.771	142.874	135.014	178.119	169.317	110.339	112.031	131.876	107.651
ENSMUSG00000001018	Snapin	63.0109	58.2953	56.2912	49.5815	52.4449	50.3953	131.928	47.2751	57.8196	61.7477	52.8714	66.171	69.4076	57.1432	47.4683	57.848
ENSMUSG00000001020	S100a4	0.39441	0.153358	0.196448	0.470592	0.318643	0.109953	3.37228	0.105251	0.188406	0.233961	0.154796	0.132844	0.739637	0.64645	0.0354505	0.0901902
ENSMUSG00000001021	S100a3	0	0.095849	0	0	0	0.0183256	0.0327406	0	0	0	0	0	0	0	0	0
ENSMUSG00000001023	S100a5	0.189317	0.402566	0.214306	0.0752947	0.224925	0.274884	0	0.140334	0.648953	0.251958	0.240794	0.531375	0.621295	0.601349	0.33678	0.126266
ENSMUSG00000001025	S100a6	40.4191	28.5055	15.5551	14.0425	31.6394	30.0356	70.9489	12.2091	26.1256	36.6239	21.2242	15.2918	40.7392	26.5195	9.18169	13.4924
ENSMUSG00000001027	Scn4a	2.39801	0.0383396	0.0892944	0.0188237	0.0562312	0.0183256	0	0.0526254	0.10467	0	0.567585	0.0147604	0.0147927	0	0.0886263	0.0360761
ENSMUSG00000001029	Icam2	104.219	92.9927	87.312	91.1254	97.7297	92.1593	33.2645	92.4101	87.5458	87.8974	89.816	89.094	82.0997	98.6964	86.003	84.5623
ENSMUSG00000001034	Mapk7	34.7396	57.5477	31.0566	28.9508	54.1506	40.3896	14.4059	45.3806	33.4734	43.2108	44.8908	44.3256	25.3104	37.7046	37.8789	29.2577
ENSMUSG00000001036	Epn2	0.520621	0.0191698	0.0892944	0.131766	0.0749749	0.0366511	2.63562	0	0.146538	0.143976	0	0	0.207098	0.12027	0.070901	0.631331
ENSMUSG00000001039	B9d1	2.79242	1.18853	0.642919	1.4306	2.13678	0.95293	1.2114	0.806922	0.460547	2.10565	0.206395	0	1.37573	1.3831	0.283604	0.865825
ENSMUSG00000001052	Sec24b	60.534	95.0438	113.011	104.227	62.2666	67.8596	35.3599	103.356	100.692	102.169	110.799	92.3117	86.1086	99.8389	106.742	131.948
ENSMUSG00000001053	N4bp3	17.0858	21.9302	11.8047	12.0471	18.725	20.8362	4.87835	19.9275	15.3865	22.1723	11.6785	6.19938	13.9644	12.6283	17.229	8.09908
ENSMUSG00000001054	Rmnd5b	83.2205	90.1172	75.1323	75.1252	97.9359	97.6936	37.2261	73.886	86.855	87.5914	73.0465	78.4664	95.3688	81.3475	69.8021	62.3394
ENSMUSG00000001056	Nhp2	266.242	181.116	186.768	176.547	195.422	221.226	354.761	198.17	198.894	178.458	236.219	211.945	197.394	205	179.681	226.576
ENSMUSG00000001062	Vps9d1	13.473	15.3742	10.6082	14.1177	7.01015	7.11032	9.88766	15.2614	11.4299	10.9962	13.3812	15.587	13.9496	11.6361	21.288	4.58166
ENSMUSG00000001065	Zfp276	15.9026	17.6937	17.1981	15.2095	12.8394	10.7938	9.33107	21.5062	5.17069	14.9555	14.0864	7.39498	12.7366	11.5008	6.27474	14.232
ENSMUSG00000001076	C1ql4	0.0157764	0	0	0	0.14995	0	0	0	0	0	0	0	0	0	0	0
ENSMUSG00000001082	Mfsd10	242.72	291.956	257.65	214.439	289.197	299.696	57.2142	233.341	269.86	274.724	263.721	219.104	234.583	312.461	280.662	258.124
ENSMUSG00000001089	Luzp1	9.6867	21.2401	29.5386	21.5343	14.0578	8.33813	10.1987	25.19	24.2206	14.2176	16.3224	35.4841	17.9732	12.1021	23.1315	12.9333
ENSMUSG00000001095	Slc13a2	0	0.651773	0.339319	0	0.224925	0.568093	0.52385	1.29809	0.0628019	0	0	0.0147604	3.52067	0	0.0531758	0.793673
ENSMUSG00000001098	Kctd10	108.936	131.198	100.367	88.1512	126.295	133.538	33.8538	117.021	130.67	131.288	100.549	82.1123	97.78	118.796	86.9247	83.8949
ENSMUSG00000001100	Poldip2	164.5	180.924	156.926	180.839	176.959	223.499	64.7118	153.087	185.977	191.578	197.072	195.162	174.495	192.537	163.586	188.083
ENSMUSG00000001103	Sebox	0	0	0	0	0.0374874	0	0	0.0350836	0	0	0	0.0738022	0	0.0150337	0	0
ENSMUSG00000001105	Ift20	49.175	36.4993	50.2013	47.9627	37.5999	34.5987	145.974	45.6087	38.2673	31.1888	55.1246	48.6651	46.109	33.8409	39.4742	46.4119
ENSMUSG00000001119	Col6a1	0.157764	0.0191698	0	0.0752947	0	0	0	0.0175418	0	0.017997	0.137596	0	0.0147927	0	0	0
ENSMUSG00000001120	Pcbp3	29.0286	53.4645	42.8256	40.0944	37.5812	46.0155	1.75162	55.397	48.9017	37.4158	49.7239	51.1892	45.5764	33.1945	63.226	43.3634
ENSMUSG00000001123	Lgals9	797.922	935.275	795.577	769.493	889.989	886.206	354.335	923.663	894.801	849.531	846.201	858.496	820.82	899.452	726.541	950.568
ENSMUSG00000001127	Araf	105.97	95.2739	111.136	83.4265	97.9172	103.045	79.4123	114.408	99.8969	77.945	125.385	85.9205	108.002	102.891	92.9336	106.911
ENSMUSG00000001128	Cfp	93.0965	70.5257	77.0967	81.9018	68.4895	80.5409	264.544	76.5875	57.2125	51.9933	89.6956	55.1154	82.9133	73.2744	62.8538	97.6759
ENSMUSG00000001131	Timp1	0.252422	0	0	0.0376473	0	0.0183256	0.654812	0	0	0.035994	0	0	0.414197	0.24054	0	0.108228
ENSMUSG00000001134	Uxt	23.4753	15.47	13.9299	15.2848	17.2255	19.9749	9.42929	14.4895	22.1691	12.7779	17.1651	15.5427	16.7306	17.1685	14.9424	17.5149
ENSMUSG00000001138	Cnnm3	92.0552	81.6058	94.6342	85.61	85.2464	96.4475	15.4372	90.9717	75.4041	134.582	74.1301	93.9649	83.0613	108.348	96.9217	78.5376
ENSMUSG00000001143	Lman2l	60.7233	58.9088	62.8632	68.424	58.7428	60.7493	79.4287	84.1129	54.198	68.2986	73.8205	57.728	49.2746	75.1536	62.907	70.1499
ENSMUSG00000001150	Mcm3ap	65.0618	121.153	118.44	134.024	108.151	90.4	38.241	88.8141	86.8132	111.761	137.562	106.925	88.076	93.9307	102.612	100.815
ENSMUSG00000001151	Pcnt	53.3242	73.2286	120.172	140.839	52.5949	60.6943	29.2046	110.776	88.7181	52.5333	92.8604	110.069	73.0614	70.5232	143.273	108.391
ENSMUSG00000001155	Ftcd	0.0315528	0	0	0	0	0.0916279	0	0	0.314009	0	0	0	0	0.0300674	0.106352	0
ENSMUSG00000001156	Mxd1	39.9458	43.8797	26.5383	31.812	38.4434	33.151	11.7702	37.8903	43.1658	26.2396	28.1041	17.4763	28.1062	50.0473	38.3043	20.7978
ENSMUSG00000001157	Gmcl1	83.8042	80.2064	80.5256	87.0218	74.4313	72.1661	134.466	86.3407	83.4847	87.9514	90.0052	102.526	89.8807	72.688	79.6928	84.1835
ENSMUSG00000001158	Snrnp27	30.054	25.9751	32.8246	29.0261	29.2402	28.9361	101.61	27.7336	29.5169	23.5401	34.7947	39.1889	35.0144	25.8279	22.1389	31.2599
ENSMUSG00000001166	Oas1c	0.96236	3.18219	3.28603	0.77177	1.78065	3.81172	0.409258	1.98222	2.95169	6.53291	2.11554	1.94838	2.30767	3.50286	2.30428	1.49716
ENSMUSG00000001168	Oas1h	0	0.0383396	0	0	0	0	0.196444	0	0	0	0	0	0	0	0	0
ENSMUSG00000001173	Ocrl	55.5644	49.3622	44.6293	62.4193	40.2428	36.7611	9.7567	38.82	29.3285	61.6937	40.7113	52.739	43.9197	35.5397	53.938	49.1356
ENSMUSG00000001175	Calm1	828.182	619.587	699.818	639.666	593.726	681.583	1485.24	773.856	668.149	560.175	732.598	764.782	788.512	641.038	621.146	659.741
ENSMUSG00000001211	Agpat3	50.9262	32.8954	25.6632	36.8944	31.452	30.787	51.9102	23.9972	37.9114	31.6387	23.0646	24.6204	37.618	31.6159	13.3648	20.7798
ENSMUSG00000001225	Slc26a3	0	0	0	0	0.0374874	0	0	0	0.020934	0	0	0	0	0.0902023	0	0
ENSMUSG00000001227	Sema6b	26.9776	26.6652	29.2707	17.7884	28.3592	32.5645	3.97798	15.5947	19.2383	48.5019	20.5191	17.3583	17.5886	27.662	24.4963	23.8643
ENSMUSG00000001228	Uhrf1	437.243	549.272	485.886	480.549	561.131	596.332	65.8577	505.695	583.995	494.594	470.476	394.738	412.022	538.162	526.298	464.93
ENSMUSG00000001229	Dpp9	73.2498	91.3057	104.224	133.723	73.794	82.1169	32.4459	129.704	74.1062	57.6624	128.016	135.176	60.6946	75.5895	133.205	117.842
ENSMUSG00000001240	Ramp2	0.0315528	0.440905	0	0.150589	0.412362	0	0.0163703	0	0.020934	0	0.447188	0	0	0.661484	0.0177253	0.505065
ENSMUSG00000001247	Lsr	0.993913	2.41539	0.285742	1.73178	0.749749	2.30902	2.8648	0	1.77939	2.68155	2.40794	0.546136	1.40531	1.18766	0.389956	0.541141
ENSMUSG00000001248	Gramd1a	63.2318	117.434	93.509	93.403	80.7479	81.8053	31.9548	103.023	110.448	119.05	123.94	104.474	79.3335	107.13	85.9498	71.5929
ENSMUSG00000001249	Hpn	3.20261	4.42822	9.94739	9.60007	5.6606	7.092	4.9602	8.47268	2.23993	3.04149	4.74708	6.52411	1.44969	3.99897	5.40621	11.2197
ENSMUSG00000001260	Gabrg1	0.126211	0	0.0714355	0	0	0	0	0	0	0	0	0	0	0	0	0.0360761
ENSMUSG00000001270	Ckb	122.819	13.8598	23.788	54.4569	23.3359	22.6687	607.109	31.0139	18.8196	28.8492	8.11819	3.11445	99.0966	65.8026	19.4978	53.0859
ENSMUSG00000001280	Sp1	39.2517	33.6622	44.7186	49.3368	38.2184	29.0644	18.2529	27.6283	38.4138	40.9972	28.8608	23.8233	20.3844	39.1929	50.4993	40.1707
ENSMUSG00000001281	Itgb7	109.741	123.281	90.9909	85.4971	150.437	136.709	0.180073	104.216	133.035	219.797	138.439	59.5879	102.292	181.923	93.3058	93.0402
ENSMUSG00000001285	Myg1	59.3508	68.4937	59.2022	58.9934	64.5721	64.7442	90.5769	55.1514	64.0998	57.5364	64.1199	76.7247	69.7774	66.9452	67.0369	52.3644
ENSMUSG00000001288	Rarg	6.86273	11.7703	9.39377	10.3907	8.32221	12.0399	4.68191	13.3142	4.94042	9.52042	6.48423	4.6643	7.98808	8.37378	4.67947	8.80256
ENSMUSG00000001289	Pfdn5	93.554	66.5575	46.5045	63.0028	70.7013	73.907	68.7062	44.907	58.343	65.7791	49.0875	47.3367	74.8513	56.3464	45.8907	48.0172
ENSMUSG00000001300	Efnb2	0	0.191698	0	1.63766	0.487337	0	0.916737	0.0701672	0.125604	0	0	0	1.15383	0.0300674	0	0.144304
ENSMUSG00000001305	Rrp15	54.6336	62.6469	77.8111	73.337	57.6182	53.4007	78.7575	90.5683	63.723	42.221	91.8284	87.9869	63.1354	67.2609	61.7371	84.1474
ENSMUSG00000001313	Rnd2	12.3687	11.6361	10.0724	9.52477	15.726	7.45851	5.61501	6.52555	11.2625	15.1895	7.757	7.11453	10.3105	7.03578	10.387	5.93451
ENSMUSG00000001323	Srr	6.92584	6.84362	6.48277	7.13417	7.27256	6.54223	4.15806	6.35013	6.23832	7.25279	5.46946	2.87828	11.2573	9.32091	2.96012	4.54558
ENSMUSG00000001333	Sync	0.0157764	0.0191698	0.0178589	0.0752947	0	0	0.0163703	0	0	0	0.343991	0.0147604	0.118342	0.0300674	0	0.324685
ENSMUSG00000001334	Fndc5	0.583726	0.0191698	0.464331	0	0	0	0	0	0.0418679	0	0	0	0	0	0.0354505	0.018038
ENSMUSG00000001348	Acp5	6.02658	3.96815	6.23275	5.9671	3.14894	6.19404	16.6322	5.1222	6.02898	3.05949	4.24829	6.21414	7.91412	7.77243	4.16544	7.19717
ENSMUSG00000001349	Cnn1	0	0.0191698	0	0.0188237	0.0562312	0	0.0327406	0.0526254	0.0628019	0.017997	0	0.0295209	0	0	0.0354505	0.613293
ENSMUSG00000001366	Fbxo9	64.5254	75.3181	84.526	93.6289	58.4054	57.0292	12.8179	95.1116	67.6167	84.244	100.428	95.4409	81.2713	70.5232	61.8257	82.542
ENSMUSG00000001376	Vps50	38.2735	31.0167	51.6657	54.4757	33.4763	37.0726	86.0259	35.3642	40.0467	37.2718	45.0284	44.9308	43.1948	37.5693	46.9365	45.077
ENSMUSG00000001380	Hars	105.023	100.277	144.853	107.069	127.157	112.171	102.478	113.232	106.114	98.6776	153.489	148.711	109.496	113.354	139.693	143.474
ENSMUSG00000001383	Zmat2	67.8069	59.0238	64.7563	72.3017	63.3538	69.7105	42.8083	56.7828	64.5394	59.5341	76.624	85.4334	64.1709	67.2308	66.1152	54.5109
ENSMUSG00000001403	Ube2c	96.2675	104.399	119.297	126.928	96.6051	108.176	95.8972	117.863	103.246	97.3458	149.842	155.044	76.7152	70.7637	131.131	158.789
ENSMUSG00000001415	Smg5	32.3258	47.5411	64.7384	78.3629	41.1799	46.6203	17.3034	70.1847	55.1819	35.5081	42.7753	32.3549	44.0528	46.4392	49.1522	63.8186
ENSMUSG00000001416	Cct3	692.915	631.472	683.727	643.073	646.883	693	356.48	629.82	687.136	644.059	723.981	736.413	672.611	613.977	704.331	702.834
ENSMUSG00000001418	Glmp	150.223	146.112	116.69	129.752	146.557	155.034	233.064	169.436	143.23	155.89	140.383	140.623	171.966	156.125	148.059	145.567
ENSMUSG00000001419	Mef2d	131.528	156.33	192.197	154.9	163.314	163.024	35.7691	238.744	149.489	159.004	148.965	137.597	123.786	126.719	194.163	168.782
ENSMUSG00000001420	Tmem79	1.89317	1.66777	2.00019	2.1459	0.918442	1.31944	0	1.12267	2.07246	0.845859	0.791179	0.797063	1.52365	0.631416	0.425406	1.62342
ENSMUSG00000001424	Snd1	531.854	631.185	628.722	542.517	631.513	631.518	123.776	607.963	572.502	589.078	547.874	519.154	522.199	600.071	676.183	679.168
ENSMUSG00000001435	Col18a1	1.83006	18.2688	5.6434	4.32944	8.17226	4.67302	1.32599	4.10478	6.28019	19.9407	15.8236	9.81569	1.0207	13.1094	3.35007	8.47787
ENSMUSG00000001436	Slc19a1	142.429	161.486	173.57	187.013	186.144	196.505	27.0437	161.56	150.348	177.774	182.608	159.708	132.573	216.02	129.82	175.438
ENSMUSG00000001440	Kpnb1	99.549	101.677	119.315	162.806	120.597	93.3505	33.9029	132.318	116.477	115.721	96.9711	91.0276	112.514	125.426	157.932	146.072
ENSMUSG00000001441	Npepps	38.2104	29.6557	30.8423	38.8709	38.0123	22.3572	44.0197	49.9064	29.2657	32.3226	37.5466	36.9306	30.7097	34.8933	37.3117	51.2641
ENSMUSG00000001444	Tbx21	1.15168	0.0383396	0.0178589	0.112942	0	0.586418	0	0	0.020934	0	0	0.0295209	0.0739637	0	0	0
ENSMUSG00000001445	Mrpl10	72.2716	72.4618	77.4003	61.8734	73.794	83.2714	42.1535	78.8854	66.4653	64.8432	68.781	77.1823	74.2892	77.8296	62.0207	58.9663
ENSMUSG00000001467	Cyp51	120.563	99.1653	48.1297	41.4685	86.0524	81.4572	42.4646	35.1713	95.8776	99.0015	39.903	45.1079	102.218	65.096	31.0369	53.4106
ENSMUSG00000001472	Tcf25	231.597	255.821	240.791	261.31	243.087	250.877	107.324	247.673	276.286	240.638	272.234	296.95	260.145	220.379	299.415	270.949
ENSMUSG00000001473	Tubb6	40.924	43.803	55.7018	54.438	59.8674	63.7547	75.5489	42.8371	43.8776	66.5529	92.0348	68.2375	59.3041	58.7217	47.8228	49.9112
ENSMUSG00000001482	Def8	475.453	660.898	371.804	440.813	636.555	569.43	17.418	453.069	640.747	695.512	445.52	475.433	564.891	576.017	431.858	454.162
ENSMUSG00000001493	Meox1	0	0	0	0	0	0	0	0	0	0	0	0.0147604	0	0	0	0
ENSMUSG00000001494	Sost	0	0	0.0357177	0.188237	0.0187437	0.0183256	0	0.0350836	0	0.089985	0	0	0.0147927	0	0	0.0721521
ENSMUSG00000001496	Nkx2-1	0	0	0	0.0752947	0.0374874	0	0.687553	0	0	0	0	0	0	0.0300674	0	0.0721521
ENSMUSG00000001497	Pax9	0.0946583	0	0.0357177	0.112942	0	0	0	0.105251	0	0.035994	0	0	0.251477	0.0300674	0	0.0721521
ENSMUSG00000001504	Irx2	0	0	0	0	0	0	0	0	0	0.035994	0	0	0.0295855	0.375843	0.0354505	0.0360761
ENSMUSG00000001506	Col1a1	0.17354	0.0383396	0.0535766	0.112942	1.08714	0.0183256	0	0.0350836	0.0837359	0.089985	0	0	0.266269	0.0300674	0.0177253	0.0901902
ENSMUSG00000001507	Itga3	0.504844	2.83713	1.62516	1.29883	3.39261	0.751348	2.30821	2.12256	2.07246	1.43976	0.0171995	0.0147604	0.0295855	0.210472	0.070901	2.34494
ENSMUSG00000001508	Sgca	0	0	0	0.0752947	0	0	0	0	0	0	0.0171995	0	0	0	0	0
ENSMUSG00000001510	Dlx3	0	0	0	0.0376473	0	0	0	0	0	0.017997	0	0	0.0147927	0	0.0177253	0
ENSMUSG00000001517	Foxm1	41.8548	67.631	83.6331	87.8877	42.6232	51.8064	5.43494	51.1343	67.3864	68.5506	83.6414	81.33	48.6681	52.9638	60.2127	98.8664
ENSMUSG00000001518	Itfg2	34.1086	37.8795	36.9143	35.3508	58.1992	52.9426	23.7861	41.4337	37.409	41.5191	32.318	25.2403	42.9285	40.2753	41.1935	27.9229
ENSMUSG00000001520	Nrip2	0.0157764	0.230037	0.571484	1.37413	0.468593	0.32986	0.360147	0.98234	2.17713	0.017997	0.39559	2.28787	0.59171	0	2.07386	0.703483
ENSMUSG00000001521	Tulp3	0.283975	0.0383396	0.16073	0.0376473	0.0937186	0.128279	0.753034	0.175418	0.0418679	0.467922	0.412789	0.0590417	0.59171	0.435978	0.248154	0.108228
ENSMUSG00000001524	Gtf2h4	46.3353	42.0585	40.4861	51.4262	47.3091	56.2778	4.10895	48.1873	45.343	46.8282	43.2397	49.2851	37.7955	49.4459	57.0222	49.5685
ENSMUSG00000001525	Tubb5	822.549	762.593	700.711	756.9	1531.81	1755.59	434.37	850.584	869.053	752.653	774.134	771.262	1108.45	1253.66	883.179	1070.5
ENSMUSG00000001542	Ell2	13.899	9.10565	13.8763	12.3671	8.37844	5.44269	35.2289	13.7001	8.66666	8.3866	10.4745	10.1995	18.0324	8.71956	11.9823	18.8858
ENSMUSG00000001552	Jup	31.8052	49.6689	17.841	32.1508	63.5412	55.8747	45.3785	26.5758	47.562	43.4988	19.6935	32.6944	38.2688	65.8026	35.4683	23.8282
ENSMUSG00000001555	Fkbp10	0.252422	0.364226	0.0178589	0	1.14337	0.989581	0	0	1.57005	0	0	0.0147604	0.606503	0	0.0177253	0.992092
ENSMUSG00000001558	Klhl10	0.078882	0.306717	0	0	0.599799	0.513116	0	1.36826	0.167472	0	0.928776	0.900386	0.0147927	0.64645	0.0177253	0
ENSMUSG00000001566	Mnx1	0.0157764	0	0	0	0	0	0	0	0	0	0.0171995	0	0.059171	0.0451012	0	0
ENSMUSG00000001569	Nom1	44.1423	49.8606	94.5627	84.9888	52.3887	53.1258	46.4753	66.0448	70.9871	52.2633	96.2143	82.8355	74.4223	59.6237	86.8892	90.2262
ENSMUSG00000001576	Ergic1	183.164	138.904	143.335	196.274	157.897	193.042	112.382	154.35	139.274	160.929	175.023	139.53	115.576	171.505	177.554	212.326
ENSMUSG00000001583	Tnk1	0.410186	0.517584	0.0714355	0.188237	1.72442	2.03414	0	0.122793	1.54911	1.2058	0.0515986	0.959428	0	0	0	0.252532
ENSMUSG00000001588	Acap1	279.084	414.125	265.079	253.517	358.511	374.538	31.8402	313.805	389.079	306.201	270.858	280.242	337.881	328.472	222.665	264.907
ENSMUSG00000001604	Tcea3	0.0157764	0	0	0	0.374874	0	0.0163703	0.0175418	0	0.053991	0	0	0.0443782	0	0	0
ENSMUSG00000001622	Csn3	0	0	0	0	0	0.109953	0	0	0	0	0	0	0	0.0300674	0	0
ENSMUSG00000001627	Ifrd1	28.4764	20.7801	35.1463	35.6332	16.3258	19.2418	64.5808	34.9432	25.686	26.0417	31.9568	37.4029	37.7067	29.5864	41.3176	29.9972
ENSMUSG00000001630	Stk38l	9.86024	10.0833	10.0188	10.673	11.6586	7.49516	4.25628	11.4548	16.9146	11.5361	12.4525	12.4283	8.40228	8.29861	2.48154	12.8792
ENSMUSG00000001632	Brpf1	50.1058	76.9475	130.048	125.573	68.8457	66.5035	34.0993	123.722	70.0032	74.6336	101.065	101.98	45.0587	79.4983	117.359	95.3671
ENSMUSG00000001642	Akr1b3	210.915	215.756	197.412	197.648	238.664	237.005	110.729	221.869	218.299	219.815	200.925	221.392	214.258	230.527	246.789	205.381
ENSMUSG00000001655	Hoxc13	0	0	0	0.0941183	0	0	0	0	0.020934	0.017997	0	0	0.0295855	0.0751686	0	0
ENSMUSG00000001656	Hoxc11	0	0	0	0	0	0	0.114592	0	0	0	0.0171995	0.0147604	0.0295855	0	0.0177253	0.018038
ENSMUSG00000001657	Hoxc8	0.0157764	0	0	0.056471	0	0	0	0	0	0	0.0171995	0	0	0	0	0.018038
ENSMUSG00000001661	Hoxc6	0.0157764	0.690112	0	0.508239	0.112462	0	0	0	0.418679	0.053991	0	0	0.059171	0.52618	0	0
ENSMUSG00000001663	Gstt1	8.03018	12.5754	5.96486	8.16947	11.9023	8.08158	0	6.03438	9.83896	6.96484	6.89702	5.81561	6.18337	9.71178	3.5805	4.16679
ENSMUSG00000001665	Gstt3	10.3651	14.8758	5.947	6.94593	18.0877	15.1369	12.6706	7.35001	17.5217	13.1378	11.5237	16.0151	17.3075	9.74185	7.33826	13.276
ENSMUSG00000001666	Ddt	4.93801	2.56875	3.44676	2.57884	2.94276	3.13367	1.80073	2.70144	2.97262	3.56341	3.59471	2.96685	2.32246	3.32245	3.226	2.47121
ENSMUSG00000001670	Tat	0	0.0191698	0	0.0188237	0	0	0.0491109	0	0	0.017997	0	0.0295209	0	0	0	0
ENSMUSG00000001672	Marveld3	0	0	0	0.0752947	0.0374874	0	0	0	0	0	0	0	0	0.0751686	0	0.0541141
ENSMUSG00000001674	Ddx18	67.1916	67.3435	100.278	109.723	66.6339	70.0587	55.3644	110.619	59.9549	61.6577	126.365	131.663	81.5672	66.7497	99.935	104.963
ENSMUSG00000001687	Ubl3	87.8272	95.2355	86.7227	90.1277	78.9111	100.131	153.161	101.795	99.6875	101.341	70.7761	79.6473	103.608	90.4729	75.1197	86.0775
ENSMUSG00000001700	Gramd3	12.984	8.76059	14.5907	11.7836	14.5264	13.0112	16.665	7.98151	10.467	15.9993	14.998	19.4838	12.5147	10.253	9.66027	8.33357
ENSMUSG00000001707	Eef1e1	53.3242	39.5473	48.3082	38.0238	35.107	40.866	63.0093	39.6795	45.3848	47.4581	52.7166	51.6467	41.5232	40.1551	42.4166	38.2045
ENSMUSG00000001729	Akt1	499.291	610.079	590.289	589.802	591.046	564.867	159.872	712.618	557.492	596.583	660.875	575.214	525.172	587.833	578.783	500.429
ENSMUSG00000001739	Cldn15	2.63466	5.25252	14.2335	13.3272	6.24166	7.33023	0.0163703	14.6299	3.30757	2.93351	13.2437	12.8859	0	5.2167	19.3205	15.2421
ENSMUSG00000001741	Il16	127.868	180.522	148.514	130.712	184.213	158.883	14.2094	125.81	164.018	171.925	138.422	140.003	137.291	161.101	146.428	139.163
ENSMUSG00000001750	Tcirg1	115.925	67.6119	111.832	83.4829	70.9637	58.8068	368.61	107.215	78.1674	70.1523	94.1503	70.5401	101.774	92.4273	94.4402	91.2905
ENSMUSG00000001751	Naglu	102.01	111.3	61.5774	73.0358	110.419	119.483	127.705	83.2884	98.0338	71.7001	79.5995	47.2629	98.1351	98.1852	66.9838	80.0167
ENSMUSG00000001755	Coasy	85.5711	90.3472	81.1507	77.5158	91.8067	101.762	35.1962	47.9593	88.5925	81.9944	87.8381	100.474	73.372	100.5	93.8553	89.5769
ENSMUSG00000001761	Smo	100.795	145.25	98.0809	102.363	114.187	122.085	7.87412	102.988	133.349	120.22	93.6171	113.537	90.1766	102.455	65.3885	85.7889
ENSMUSG00000001763	Tspan33	13.5992	16.7927	19.7519	37.0073	29.5963	14.2206	3.4705	20.3485	18.9452	23.1801	9.15016	12.0298	4.2899	21.5584	14.7297	30.1416
ENSMUSG00000001767	Crnkl1	40.5611	45.6624	63.0775	51.238	50.833	37.6957	44.8219	53.3446	47.3945	47.3681	65.5303	66.8205	67.662	42.3049	42.842	48.0533
ENSMUSG00000001768	Rin2	30.8271	6.92029	8.26866	15.4542	6.52281	4.43479	165.193	7.27984	10.8019	5.14714	3.6635	3.30634	27.2778	19.6791	7.37371	14.9355
ENSMUSG00000001773	Folh1	0	0	0	0	0	0	0.229184	0	0	0	0	0	0	0	0	0
ENSMUSG00000001774	Chordc1	89.1051	90.2897	112.707	110.89	82.3786	62.7101	129.096	100.164	95.6054	97.2918	119.881	127.058	97.9428	81.4828	93.483	95.4031
ENSMUSG00000001783	Rtcb	293.378	309.976	300.047	294.044	306.76	318.59	236.289	296.807	325.774	309.081	363.891	298.987	286.388	320.429	281.53	321.582
ENSMUSG00000001785	Pwp1	183.495	148.566	160.337	154.279	152.949	164.014	88.2032	157.192	152.378	189.095	181.06	187.162	150.842	139.257	152.242	172.895
ENSMUSG00000001786	Fbxo7	93.0965	84.7496	68.5781	76.2735	74.45	91.4629	28.1406	104.83	90.7278	72.5999	74.3708	77.2118	96.4783	74.1764	65.8139	87.3221
ENSMUSG00000001794	Capns1	94.2324	75.4523	66.8458	106.485	82.6411	79.4597	99.8097	89.5859	71.343	77.873	41.3649	46.4806	114.836	105.627	75.3501	104.494
ENSMUSG00000001802	Lrp3	0	0.0383396	0	0.0941183	0.0749749	0	0	0	0	0.053991	0.997574	0	0.0887565	0.0451012	0	0.18038
ENSMUSG00000001804	Dsg4	0	0	0	0.0752947	0	0	0	0	0.125604	0.017997	0	0	0	0.0150337	0	0
ENSMUSG00000001815	Evx2	0.0157764	0	0	0	0	0	0	0	0.0418679	0.035994	0	0	0.0295855	0	0	0.198418
ENSMUSG00000001819	Hoxd13	0.0157764	0	0	0	0	0	0.0327406	0	0	0	0	0	0.0295855	0	0	0
ENSMUSG00000001823	Hoxd12	0	0.0191698	0	0	0	0	0	0	0	0	0	0.0295209	0	0	0	0
ENSMUSG00000001827	Folr1	0	0.153358	0.285742	0	0	0	0.491109	0	0.0418679	0.071988	0.481587	0	0.118342	0.0902023	0.0177253	0.721521
ENSMUSG00000001829	Clpb	71.7668	81.2799	105.224	88.5465	88.4891	114.883	79.265	136.107	61.0434	77.0632	108.048	113.035	74.8365	71.0794	87.1551	155.307
ENSMUSG00000001833	Septin7	185.467	205.462	234.576	226.957	167.813	155.602	407.129	204.835	210.847	158.32	222.562	252.02	240.9	179.924	172.555	176.773
ENSMUSG00000001844	Zdhhc4	72.2874	55.8224	56.0054	52.5557	71.4698	73.8704	32.2659	55.0111	56.9613	71.3581	62.8471	62.7909	63.0615	68.6139	61.1522	50.2359
ENSMUSG00000001847	Rac1	552.047	528.07	490.744	475.467	551.909	551.765	376.975	462.296	528.562	527.06	445.726	504.039	486.119	508.019	474.86	440.886
ENSMUSG00000001855	Nup214	142.287	193.001	176.035	207.907	181.795	171.344	45.2803	141.194	199.836	180.402	165.614	151.501	154.984	180.269	184.892	218.801
ENSMUSG00000001864	Aif1l	3.24994	3.94898	1.6073	5.53416	6.74774	6.98204	0.0327406	4.19249	5.02415	3.27545	2.92392	4.00008	1.61241	2.31519	4.71492	6.99876
ENSMUSG00000001865	Cpa3	90.8089	113.773	117.654	120.377	103.578	78.8733	137.461	119.74	110.155	121.642	79.7027	167.398	136.256	173.7	263.415	163.695
ENSMUSG00000001870	Ltbp1	0.441739	2.45373	2.85742	7.26593	0.318643	2.47395	0.589331	0	2.67955	6.24496	1.71995	4.64954	0	0.165371	3.56278	2.27279
ENSMUSG00000001891	Ugp2	37.6898	35.79	35.3784	37.4967	30.7584	36.7244	59.1295	40.6443	48.9436	39.1615	44.3576	43.2628	60.3692	40.561	38.2688	32.2159
ENSMUSG00000001901	Kcnh6	0.0631056	0.0191698	0.0357177	0	0.374874	0	0.622072	0	0	0.053991	0	0.0147604	0.295855	0.0451012	0.0177253	0.0360761
ENSMUSG00000001909	Trmt1	52.2041	57.4327	64.5777	69.5158	51.5265	60.9142	57.3615	69.2901	58.1127	56.7806	72.5649	61.0491	60.3988	73.3796	43.4978	66.2537
ENSMUSG00000001910	Nacc1	80.2703	112.757	127.977	152.02	120.503	110.961	31.3	149.351	110.05	104.995	98.519	88.5478	109.925	133.605	166.724	178.414
ENSMUSG00000001911	Nfix	82.053	76.9092	85.0082	88.6971	80.2419	92.874	13.7674	89.8841	84.2592	96.122	72.7713	74.4811	85.221	73.1541	77.8671	106.226
ENSMUSG00000001918	Slc1a5	222.7	321.937	250.471	205.78	297.088	296.929	35.1962	240.726	295.713	233.061	282.675	227.443	261.906	301.997	310.564	269.326
ENSMUSG00000001924	Uba1	763.798	778.619	734.017	708.466	793.103	780.284	149.002	648.099	796.035	747.092	694.982	659.053	764.593	834.161	882.045	781.408
ENSMUSG00000001930	Vwf	51.8728	84.4621	68.8281	117.234	54.1131	47.4266	41.6788	32.3997	101.718	184.559	83.8478	29.4471	29.6742	41.463	66.4875	42.4254
ENSMUSG00000001942	Siae	52.4723	56.5125	51.8622	56.151	57.5245	53.7122	48.4725	62.9049	77.979	70.8362	50.0335	49.3441	76.8779	59.3381	48.514	43.4356
ENSMUSG00000001943	Vsig2	0.646832	0.843471	0.0357177	0.150589	0.224925	0	0.294665	0.105251	0.0418679	0.755874	0.343991	0	0.118342	0.0300674	0.726736	0.108228
ENSMUSG00000001946	Esam	59.8241	75.0497	25.3417	36.2167	78.5549	69.179	0	30.6104	58.8454	78.5389	33.1951	46.1559	71.8188	59.5786	24.39	21.9342
ENSMUSG00000001948	Spa17	1.12012	1.22687	0.964379	1.24236	1.34955	1.15451	1.32599	1.57876	1.42351	0.845859	0.77398	0.974188	0.458575	0.165371	0.921714	1.33481
ENSMUSG00000001962	Fam50a	47.3292	46.7168	69.2031	61.9299	48.6212	34.1405	47.392	66.3781	45.4895	41.969	66.3215	52.7095	47.0261	43.703	58.2807	52.4185
ENSMUSG00000001964	Emd	25.4158	10.7734	11.9654	16.1507	15.8572	20.7995	13.1454	13.7528	10.3204	14.4696	13.0889	16.3398	14.6152	15.0337	9.92615	17.7133
ENSMUSG00000001983	Taco1	12.3056	6.76694	5.10764	9.61889	9.40935	6.10242	6.51538	13.6826	4.68921	5.75904	8.13539	10.1552	3.97925	7.44169	4.46677	7.26933
ENSMUSG00000001985	Grik3	0.0473292	0.0191698	0	0.0376473	0.0374874	0.0366511	0.196444	0	0.125604	0.125979	0.257993	0	0.118342	0.0300674	0.0531758	0.018038
ENSMUSG00000001986	Gria3	25.4631	21.8919	51.9336	36.9697	29.7838	28.7711	0.654812	20.2608	25.8534	15.1175	50.5151	26.5983	15.7395	23.0768	57.2526	52.1479
ENSMUSG00000001988	Npas1	2.69776	2.83713	2.48238	1.46825	1.23709	0.678046	0.0163703	1.12267	2.26087	1.31378	2.71753	1.37272	1.71596	1.21773	1.45347	0.883864
ENSMUSG00000001995	Sipa1l2	4.92223	2.14702	4.10754	21.346	4.12362	2.56558	18.9568	0.964798	2.93076	10.4023	2.88952	2.52403	4.52658	1.26283	0.389956	5.66394
ENSMUSG00000001998	Ap4e1	12.1005	5.67426	20.2698	17.2048	14.9013	16.9328	14.9788	16.4016	15.5958	6.20897	17.5607	9.74188	14.9111	7.74237	23.096	12.8792
ENSMUSG00000001999	Blvra	60.2816	48.9213	48.1832	55.2663	40.8988	47.0967	133.516	58.958	48.5249	37.4338	54.5742	51.2335	64.8662	57.083	43.3737	42.6599
ENSMUSG00000002006	Pdzd4	0.0157764	0.0575094	0.642919	0.056471	0	0.0733023	0.0163703	0.0175418	0.0418679	0.017997	0.103197	0.0147604	0.0295855	0.0300674	0.106352	0
ENSMUSG00000002007	Srpk3	0	0.268377	0	0	0	0	0.0163703	0	0.0418679	1.60173	0	0	0	0	0	0
ENSMUSG00000002010	Idh3g	434.955	434.215	460.187	367.664	461.283	463.325	214.058	444.246	409.866	409.846	473.177	400.657	401.342	454.545	427.888	449.273
ENSMUSG00000002012	Pnck	49.0804	29.2531	13.5549	26.6167	31.7893	32.7844	22.8529	10.8233	36.4879	39.9174	10.3885	18.1258	46.464	49.1302	10.7947	27.7966
ENSMUSG00000002014	Ssr4	144.701	93.7403	89.1158	89.7701	108.02	117.155	121.877	93.5854	95.6264	97.7417	90.9168	94.6734	107.75	100.997	82.0325	97.2971
ENSMUSG00000002015	Bcap31	345.44	320.96	289.582	280.51	321.661	312.946	1032.57	317.91	323.262	284.713	349.288	370.826	364.863	335.177	291.013	340.287
ENSMUSG00000002017	Fam98a	36.3646	33.3171	51.1478	53.3839	41.2924	39.4916	21.6907	39.9602	29.8518	54.225	60.766	44.7831	24.6151	44.0638	35.1669	32.8833
ENSMUSG00000002020	Ltbp2	0.0157764	0.0191698	0.0357177	0	0.0374874	0.0366511	0.54022	0.0175418	0	0.035994	0.0171995	0	0.355026	0.12027	0	0
ENSMUSG00000002028	Kmt2a	17.6538	34.1414	51.1299	66.7299	25.5852	13.2127	10.8208	61.3612	38.5185	32.6646	31.4064	39.0561	25.5323	25.4521	43.8523	29.9071
ENSMUSG00000002031	Ift46	18.8212	27.5853	11.6083	21.2519	28.5842	27.5983	23.2786	22.4184	23.4042	24.7099	22.9614	20.0299	30.8873	20.9119	18.8242	15.5488
ENSMUSG00000002032	Tmem25	0.0946583	1.16936	0.78579	1.29883	0.0187437	1.22781	0.0163703	0.0350836	2.88889	2.78954	0	1.29892	0.118342	2.11975	0.0886263	2.12849
ENSMUSG00000002033	Cd3g	0	0	0.142871	0.056471	0.0187437	0	0	0.0175418	0.0418679	0.035994	0.0171995	0	0	0.0300674	0.106352	0.0541141
ENSMUSG00000002043	Trappc6a	96.6619	108.731	85.6154	85.61	110.85	109.88	166.142	91.726	96.5265	98.5156	94.0643	93.3892	105.679	109.31	73.4003	108.318
ENSMUSG00000002052	Supt6	71.9088	57.2218	115.422	123.502	66.6152	58.5685	49.1273	74.2369	69.0611	85.8457	119.468	113.198	89.1855	100.515	107.929	78.5015
ENSMUSG00000002055	Spag5	40.9871	45.4899	86.2941	68.1417	34.226	58.8801	0.491109	94.1468	30.0193	45.9284	91.1576	65.3149	43.3427	36.0058	85.0635	101.933
ENSMUSG00000002057	Foxn1	0.0157764	0	0.16073	0	0	0.0183256	0	0	0.0628019	0.017997	0	0.0147604	0	0.0150337	0.0177253	0.018038
ENSMUSG00000002058	Unc119	67.5703	69.4713	64.792	73.0923	69.4455	58.6602	52.6796	54.6251	61.3575	71.7181	56.3801	75.9424	58.816	64.4195	59.6101	48.5945
ENSMUSG00000002059	Rab34	1.62497	2.74128	1.76803	1.88237	5.34196	3.83004	7.90686	2.52602	3.72625	1.70972	4.62668	3.86723	3.4763	0.691551	2.00295	5.98863
ENSMUSG00000002064	Sdf2	65.5509	62.8961	54.8624	52.1415	68.3771	70.2786	31.3	77.6926	52.314	73.9497	56.4145	43.6023	64.1857	70.2826	43.7105	53.9157
ENSMUSG00000002068	Ccne1	19.9887	15.8342	23.6094	41.7885	19.0249	23.8599	16.4849	16.3139	13.0419	17.6011	34.9495	30.4655	13.0324	24.4599	28.7149	33.5327
ENSMUSG00000002076	Hsf2bp	0.631056	0.210868	0.0357177	0.0376473	1.87437	0	0.327406	0	2.13526	2.53758	0	0	0.310648	1.06739	0	0.306647
ENSMUSG00000002083	Bbc3	21.9134	25.9176	17.0731	19.0495	34.7321	26.2605	22.7384	27.2599	20.6618	45.4064	17.3543	15.4542	23.1802	34.4874	21.3412	23.3593
ENSMUSG00000002100	Mybpc3	0.694161	2.08951	1.01796	0.0941183	1.1996	0.311535	0.0163703	0	0.942028	0.053991	0	0	1.13904	0.0150337	0.0354505	0.0360761
ENSMUSG00000002102	Psmc3	391.917	317.873	362.071	324.275	341.867	386.413	654.239	330.575	327.575	303.25	378.786	361.35	338.931	318.88	332.065	340.594
ENSMUSG00000002103	Acp2	32.4047	27.547	34.6819	42.0332	19.5872	22.9436	111.727	29.5579	36.8438	35.778	35.2591	42.5248	42.5439	33.5853	32.1714	31.7289
ENSMUSG00000002104	Rapsn	8.29838	9.25901	7.71503	6.73887	13.3268	7.91665	13.4564	9.20944	7.28502	6.47892	9.27056	7.80827	12.4259	10.3432	10.6883	11.7969
ENSMUSG00000002105	Slc39a13	17.2436	20.4733	18.8054	17.7884	18.3876	12.8096	23.5896	21.6992	20.913	17.817	20.4503	19.6019	18.4613	21.1975	16.8567	16.0178
ENSMUSG00000002107	Celf2	102.121	115.766	160.533	172.651	105.621	103.045	57.2797	174.208	132.261	121.48	176.089	162.704	114.644	106.649	174.31	143.438
ENSMUSG00000002108	Nr1h3	3.36037	4.40905	3.2146	3.1812	0.95593	1.68595	11.3774	3.59607	0.711755	0.17997	2.83793	1.93362	4.11238	4.19441	3.70458	2.02026
ENSMUSG00000002109	Ddb2	10.1127	10.9268	5.60769	6.2871	10.5902	8.72297	0.507479	5.98175	9.29468	7.45076	8.13539	3.17349	13.5649	7.74237	2.65879	6.49369
ENSMUSG00000002111	Spi1	242.278	304.608	367.821	289.15	303.48	298.817	363.257	385.744	273.356	283.435	378.012	338.471	275.752	354.014	309.164	321.6
ENSMUSG00000002129	Sf3a1	241.253	279.093	275.937	267.842	267.717	284.175	49.6511	264.057	290.689	242.546	266.318	313.305	249.702	247.861	331.959	249.791
ENSMUSG00000002147	Stat6	200.407	266.192	196.073	223.456	243.218	221.648	178.011	246.883	248.8	203.078	263.789	212.358	219.687	276.079	251.823	219.036
ENSMUSG00000002190	Clgn	0.078882	0	0.0178589	0	0.0187437	0.0366511	0.0327406	0.280669	0.0418679	0	0	0	2.30767	0	0	0.0541141
ENSMUSG00000002204	Napsa	270.486	281.47	225.611	203.032	338.736	333.837	148.119	259.268	292.447	293.819	249.239	232.816	258.888	331.043	212.349	250.711
ENSMUSG00000002205	Vrk3	111.145	120.693	110.421	109.949	121.178	132.201	86.337	143.106	106.638	96.5179	116.235	133.169	98.2978	130.132	94.4934	91.4709
ENSMUSG00000002210	Smg9	34.219	50.7233	48.0404	59.8404	39.3243	48.3978	19.9718	54.3971	36.467	31.0448	47.5396	49.477	36.6416	48.2733	59.2024	46.1593
ENSMUSG00000002221	Paxip1	55.8642	112.009	158.587	142.288	93.4374	80.156	20.6593	154.841	95.1867	68.4966	158.442	130.615	110.176	106.514	134.801	112.72
ENSMUSG00000002222	Rmnd5a	51.8885	49.2664	73.9893	92.7254	46.4282	40.3712	34.8687	41.346	59.8293	76.2533	49.2767	44.4732	65.0585	45.8679	69.3235	42.9846
ENSMUSG00000002227	Mov10	84.5141	105.645	83.3652	64.3205	108.526	112.574	39.0268	71.3249	107.349	102.817	72.8573	95.6623	101.641	99.4481	101.619	84.1294
ENSMUSG00000002228	Ppm1j	0.252422	0.575094	0.767931	0.677652	0.0937186	0.916279	2.4228	0.140334	0.10467	1.00783	0	0	0.680466	0.135303	0.974889	0.288608
ENSMUSG00000002233	Rhoc	21.6294	0.88181	3.44676	9.09183	2.34296	2.49228	122.875	5.47304	1.80032	4.8052	0.412789	0.383771	17.2631	12.3277	4.25406	10.6605
ENSMUSG00000002240	Prr27	0	0	0	0	0	0	0	0	0	0	0	0	0	0	0	0
ENSMUSG00000002249	Tead3	0.410186	0.555924	0	1.97648	1.34955	1.576	0.163703	0.0701672	1.59098	1.8177	0.257993	0.531375	0.458575	0.0451012	0.070901	0.468989
ENSMUSG00000002250	Ppard	1.4672	0.191698	0.767931	0.414121	1.36829	1.19116	0.0163703	0.403461	0.146538	0.431928	0.601984	0.132844	1.06508	0.481079	0.460857	1.1364
ENSMUSG00000002257	Def6	186.524	236.785	219.825	235.861	227.08	236.253	48.3415	301.824	243.692	263.458	259.042	266.131	265.811	226.964	270.913	230.147
ENSMUSG00000002265	Peg3	0	0	0	0	0.0374874	0	1.37511	0.0350836	0	0.017997	0	0	0.059171	0.0300674	0.106352	0.0360761
ENSMUSG00000002266	Zim1	0	0	0	0	0	0	0	0	0.0837359	0	0	0	0	0.0902023	0	0
ENSMUSG00000002274	Metrn	62.9951	51.7584	50.2906	54.1369	58.7053	76.6925	3.65058	56.1688	49.6554	50.4276	55.2105	54.9974	49.319	56.1058	47.3974	52.3103
ENSMUSG00000002279	Lmf1	45.72	44.0522	33.0568	38.9273	51.4515	50.0288	27.0437	48.7662	49.4879	41.6631	37.4606	37.1963	34.5263	40.9669	30.1152	53.2483
ENSMUSG00000002280	Ciao3	38.5733	39.5473	39.9146	43.2756	40.5427	42.5337	36.7186	43.03	44.5684	39.2335	55.6921	55.3221	45.0143	40.9218	42.2038	44.3916
ENSMUSG00000002289	Angptl4	38.1	35.4066	56.0947	45.3274	39.568	30.0906	34.0502	50.1169	33.0338	29.4611	47.7631	42.9086	39.8812	37.7948	51.3678	36.8337
ENSMUSG00000002297	Dbf4	28.082	27.0486	37.1107	41.9203	24.4043	26.2789	12.2614	31.3823	27.277	30.3789	33.9863	52.68	33.047	21.0923	34.9188	27.2915
ENSMUSG00000002307	Daxx	60.3762	83.3311	85.1868	72.5088	75.987	85.4888	51.9266	94.9011	58.343	64.8252	78.0859	95.0129	71.3306	92.9685	80.8804	94.7718
ENSMUSG00000002308	Cd320	69.5266	60.8066	53.5766	42.2027	62.3416	77.0774	85.7149	38.206	71.8244	61.5498	59.2524	40.2369	70.3839	61.0068	45.1462	60.9505
ENSMUSG00000002319	Ipo4	40.5927	49.8606	53.3266	49.9956	65.8279	45.7223	13.8984	60.642	55.3285	50.3376	53.0778	38.4804	47.7954	57.1131	50.712	61.8163
ENSMUSG00000002320	Tm9sf1	88.9788	118.757	92.3482	97.7325	114.543	103.045	47.3429	76.9909	87.4202	99.8294	97.3838	96.1642	94.1262	96.3661	94.4047	83.3718
ENSMUSG00000002324	Rec8	13.0155	15.9876	7.08997	10.2965	12.2022	11.4352	0.294665	5.94667	16.5169	15.3874	7.12061	11.2032	30.8281	16.943	7.32053	12.7348
ENSMUSG00000002325	Irf9	113.48	97.2675	80.6864	69.9676	107.383	99.6545	62.8292	89.0421	126.964	130.082	77.9656	69.7726	95.5463	126.449	83.1492	75.7237
ENSMUSG00000002326	Gmpr2	31.4423	22.4862	29.6814	22.0237	22.6424	27.8182	24.5882	22.0149	25.351	21.1105	26.3669	24.5171	31.4642	15.59	23.4328	22.1687
ENSMUSG00000002329	Mdp1	35.418	33.8539	32.9853	32.3579	32.3142	29.1377	37.3407	44.2229	38.9162	31.1348	30.1508	36.5173	36.4937	33.6004	30.7888	30.9533
ENSMUSG00000002332	Dhrs1	71.4986	62.2827	53.023	54.5133	61.948	58.8068	48.1451	47.0471	54.2399	70.9982	58.9944	60.8277	59.171	70.1473	50.4993	60.7521
ENSMUSG00000002341	Ncan	2.31913	0.134189	0.107153	0.734123	0.0374874	0.0366511	6.38442	0.245585	0.125604	0.287952	0.0171995	0.0885626	0.857979	0.586315	0.159527	0.505065
ENSMUSG00000002342	Tmem161a	59.4454	77.3693	72.632	62.9652	64.8908	82.6667	11.9667	95.1993	70.694	73.8237	85.9461	76.4738	56.2716	91.6155	67.3383	73.4328
ENSMUSG00000002343	Armc6	24.1221	27.7003	21.7164	21.6849	25.2665	25.8024	12.7525	30.0842	25.372	37.6137	30.856	19.3214	23.4761	42.1696	27.4742	34.633
ENSMUSG00000002345	Borcs8	18.4426	20.3008	23.3415	14.8519	16.1196	21.4409	31.8566	19.5591	16.4332	23.5581	16.0988	18.4063	18.0471	16.5672	25.5244	20.5634
ENSMUSG00000002346	Slc25a42	6.8154	10.5242	12.019	8.753	4.6297	9.25441	1.2114	7.35001	5.44283	10.0783	9.04696	10.5832	6.84904	6.34423	9.90842	17.9298
ENSMUSG00000002365	Snx9	65.5351	80.5898	102.51	125.046	76.9055	66.4668	93.147	115.232	73.1014	69.6304	109.406	83.7802	71.3306	81.2723	98.8715	95.3851
ENSMUSG00000002372	Ranbp3	129.603	187.481	172.356	206.872	175.01	153.055	113.544	213.308	170.298	170.738	200.272	189.76	139.865	152.592	217.099	164.236
ENSMUSG00000002379	Ndufa11	89.9412	68.2445	53.0766	57.4122	67.0088	77.2423	89.6274	55.8355	67.5748	56.6906	60.6972	53.6394	66.8484	66.6745	50.8361	63.8546
ENSMUSG00000002384	Bmp8b	0	0	0	0.0376473	0	0.0183256	0	0	0	0.017997	0.137596	0	0	0.0150337	0	0.306647
ENSMUSG00000002393	Nr2f6	16.9123	19.6107	15.7515	16.9601	19.381	18.1423	14.8642	15.5596	17.3333	17.3131	19.4871	12.3988	16.0058	16.8077	14.7829	15.3323
ENSMUSG00000002395	Use1	104.645	69.9122	73.65	63.831	90.9633	107.021	118.619	88.2352	83.6312	79.5288	80.6659	67.0862	96.567	83.6927	68.8626	72.567
ENSMUSG00000002396	Ocel1	21.093	17.2528	13.5192	11.7648	16.8506	12.7179	26.0615	10.5777	15.3655	13.8937	14.0692	22.1111	14.0235	12.8388	14.2511	14.9175
ENSMUSG00000002409	Dyrk1b	18.9948	35.1382	16.5552	15.6801	39.568	22.9436	10.1987	24.2252	28.533	30.5229	15.8236	19.1295	27.0559	24.0389	34.5643	15.0257
ENSMUSG00000002413	Braf	10.9646	17.3103	26.1811	17.3931	10.9463	13.9091	24.048	26.7337	14.0258	14.3256	14.4132	30.8641	10.917	16.3567	18.9483	16.8475
ENSMUSG00000002416	Ndufb2	25.3053	12.307	15.1086	8.97889	12.5021	14.2573	11.5902	11.7179	17.6055	15.8734	10.3541	16.4579	16.6862	9.03527	11.3442	9.21743
ENSMUSG00000002428	Hltf	43.9688	58.4295	65.0063	71.3417	42.6232	49.7173	58.4747	67.5885	46.8293	60.5599	60.2328	59.5583	63.8159	62.3448	64.9985	59.3632
ENSMUSG00000002455	Prpf6	129.65	163.173	149.693	146.316	151.093	154.32	123.416	161.595	161.317	198.687	177.809	179.93	157.203	132.282	165.129	147.154
ENSMUSG00000002458	Rgs19	107.153	135.205	153.658	128.81	133.08	148.016	122.777	133.651	144.005	124.143	165.46	153.818	132.647	122.164	138.168	122.893
ENSMUSG00000002459	Rgs20	0.0315528	0	0	0.0752947	0.0749749	0	0	0.0175418	0	0.017997	0	0	0.118342	0.0902023	0.0177253	0.018038
ENSMUSG00000002475	Abhd3	0.0946583	0	0.0357177	0.112942	0.0374874	0.109953	1.52244	0.0701672	0	0.107982	0	0.0147604	0.118342	0.195438	0.0531758	1.10032
ENSMUSG00000002477	Snrpd1	113.637	67.286	89.2408	86.25	68.3396	80.4126	83.112	80.5519	79.9259	71.88	101.133	95.3671	90.3689	65.7876	77.2467	79.6018
ENSMUSG00000002486	Tchp	4.65404	7.76377	9.51878	9.61889	7.57246	6.34065	2.29184	10.6479	4.41707	5.29112	8.56537	6.68647	9.39339	2.99171	2.99557	6.36742
ENSMUSG00000002489	Tiam1	13.6781	22.8504	19.609	31.6426	15.9509	8.63134	1.14592	26.1197	10.467	17.1331	15.9784	11.2917	17.7957	14.0716	20.6677	32.252
ENSMUSG00000002496	Tsc2	141.12	154.719	136.549	174.232	220.501	138.395	47.392	90.6033	132.491	168.344	118.539	138.645	123.815	142.294	160.272	159.709
ENSMUSG00000002500	Rpl3l	0.0157764	0.153358	0.16073	0.056471	0	0	0	0	1.63285	0	0.412789	0	0	0.0601349	0	0
ENSMUSG00000002504	Slc9a3r2	12.6527	17.2336	11.0011	9.65654	20.4681	14.2206	12.4905	16.0683	21.2061	11.77	17.2683	14.849	12.4851	17.4391	10.4047	10.6424
ENSMUSG00000002524	Puf60	458.667	513.655	507.692	522.921	457.515	551.142	453.179	588.755	457.993	448.467	546.963	559.878	486.933	473.652	519.988	514.589
ENSMUSG00000002546	Golga2	33.2882	29.2531	48.5583	45.685	27.6095	29.7791	30.0722	43.4159	26.0419	27.3015	48.2791	56.5029	41.5528	18.6268	46.8479	49.6407
ENSMUSG00000002550	Uck1	68.8166	76.8517	76.0252	83.4641	85.3964	91.4629	117.522	94.217	78.2721	68.6046	73.2185	99.7657	83.934	65.4568	63.8464	72.4407
ENSMUSG00000002565	Scin	9.29229	6.84362	13.6085	11.8024	16.2321	7.2386	0.785775	5.31516	8.7504	7.8107	10.6637	20.0004	15.1034	19.1079	22.9188	38.7457
ENSMUSG00000002578	Ikzf4	0.078882	1.4569	0.0535766	1.41177	0	0.0916279	0	0	0.0418679	0.071988	0.120397	0.457573	0.0739637	2.70607	0.0177253	0.649369
ENSMUSG00000002580	Mien1	20.6828	14.9333	14.1799	11.1436	14.264	16.7679	33.9356	16.0332	17.5008	14.2176	14.1724	14.3176	18.7128	14.6128	12.0177	11.9592
ENSMUSG00000002588	Pon1	0	0.0191698	0.0178589	0	0	0	0.0163703	0	0	0	0	0	0	0.0300674	0	0
ENSMUSG00000002602	Axl	46.9663	11.291	13.6978	29.2708	11.1338	15.5401	222.391	11.4548	16.182	7.64873	10.6981	2.84876	46.1386	26.9555	9.78434	25.8485
ENSMUSG00000002603	Tgfb1	362.131	397.179	377.894	473.66	433.074	389.198	155.076	418.407	398.08	449.151	268.519	280.197	377.555	432.445	432.284	453.386
ENSMUSG00000002608	Ccdc97	105.528	109.958	111.689	104.678	83.3721	114.48	19.3661	109.619	108.166	136.741	100.48	122.969	86.434	166.874	117.27	87.5746
ENSMUSG00000002617	Zfp40	1.92472	3.52724	8.50082	8.62124	0.824724	1.15451	2.43918	7.4728	4.68921	4.48125	6.91422	5.60896	6.56798	3.71333	4.18316	6.61996
ENSMUSG00000002625	Akap8l	36.4592	44.7231	43.4328	32.452	38.3684	29.5775	27.8459	31.8383	34.0386	53.7751	34.8463	35.1298	36.6268	26.8653	35.6987	27.3998
ENSMUSG00000002633	Shh	0.0946583	0	0	0.0752947	0	0	0	0	0.0418679	0	0	0	0	0	0	0
ENSMUSG00000002635	Pdcd2l	55.596	52.7361	43.1113	32.0002	40.6926	56.4061	22.1981	31.4173	50.5765	40.7812	44.5468	47.8828	47.9433	53.4749	33.8375	36.8337
ENSMUSG00000002658	Gtf2f1	69.1321	84.9222	124.333	110.533	76.1182	74.9516	82.0152	116.144	70.4009	61.4058	154.28	125.892	91.3008	96.0655	109.56	136.999
ENSMUSG00000002660	Clpp	98.1607	107.773	97.6166	95.3419	115.274	128.151	119.012	123.81	111.662	108.036	132.351	121.213	118.505	132.222	95.1315	115.461
ENSMUSG00000002661	Alkbh7	34.8816	24.2498	20.8056	16.3954	31.1521	28.2031	11.9176	19.9275	28.3655	21.4344	20.3643	16.9302	27.263	24.8658	19.5864	22.0605
ENSMUSG00000002664	Pspn	0.489068	0.0383396	0.48219	0.508239	0	0.238232	0	0.0175418	0.125604	1.36777	0.326791	0	0.680466	0	0.957164	0.775635
ENSMUSG00000002668	Dennd1c	36.8379	46.0458	37.1822	25.5625	40.0741	42.2221	43.5614	17.9277	44.4219	58.3463	30.1852	34.5542	55.1769	50.7989	19.4978	24.4415
ENSMUSG00000002679	Med6	12.9524	10.0641	15.7872	10.2589	12.3896	9.29106	26.4872	15.735	11.1997	11.4641	19.3667	11.0556	17.485	16.3717	12.9217	14.2681
ENSMUSG00000002688	Prkd1	1.30944	0	0	0	0	0	0.229184	0	0.0418679	0	0	0	0.0295855	0.0300674	0	0
ENSMUSG00000002699	Lcp2	106.806	154.087	114.297	116.631	119.004	132.787	130.52	93.6556	145.282	127.995	116.149	136.268	165.279	135.319	137.548	100.634
ENSMUSG00000002718	Cse1l	280.646	281.566	278.92	256.209	286.029	265.006	109.288	197.257	338.523	274.436	300.958	256.477	282.053	240.239	307.25	253.633
ENSMUSG00000002728	Naa20	80.57	70.1231	68.6495	67.9911	80.8979	72.4593	165.487	68.8866	81.1191	76.2713	81.5087	77.2856	85.3689	74.6725	60.8863	69.5366
ENSMUSG00000002731	Prkra	37.3427	35.3491	23.288	24.3578	28.5092	38.1722	50.5842	32.1366	35.9227	35.6341	24.3202	35.2331	32.8547	25.0612	26.2511	25.0548
ENSMUSG00000002732	Fkbp7	6.62608	4.98415	2.10735	2.29649	3.86121	6.5239	0	3.08735	6.4686	3.99534	2.39074	4.92998	5.68041	3.23225	3.2969	4.02248
ENSMUSG00000002733	Plekha3	36.9483	30.9017	42.5041	44.2544	31.7331	36.0647	38.3392	42.8897	34.0596	35.5801	51.1343	53.6394	45.2362	32.563	41.0872	41.1087
ENSMUSG00000002741	Ykt6	67.6176	66.0016	79.1327	81.4312	65.7717	67.0349	74.8287	75.7279	71.7198	57.3745	61.3508	57.6395	61.1088	68.2531	77.8494	70.4385
ENSMUSG00000002748	Baz1b	78.7084	100.507	185.411	211.22	88.133	72.7342	39.9927	157.929	89.9951	102.169	154.125	196.314	106.789	87.7669	185.583	162.396
ENSMUSG00000002763	Pex6	116.319	147.914	104.349	78.25	123.858	161.522	16.8778	115.548	153.927	137.821	88.9389	109.419	95.354	117.338	147.403	110.591
ENSMUSG00000002767	Mrpl2	133.058	107.274	105.6	92.763	120.672	143.123	128.245	118.618	106.679	107.64	132.265	104.829	107.543	119.668	106.015	112.449
ENSMUSG00000002768	Mea1	42.6278	45.4132	42.8434	43.1627	47.759	43.5049	55.037	49.9941	46.0757	39.6654	52.8714	60.2226	43.8013	43.2069	38.003	43.3634
ENSMUSG00000002769	Gnmt	0.0157764	0	0.0178589	0.56471	0.262412	0	0.0163703	0	0.020934	0	0	0	0	0.0300674	0.0886263	0
ENSMUSG00000002771	Grin2d	0.836149	2.30037	0.642919	1.60001	3.97367	1.02623	0.0818515	0.175418	3.2657	4.30128	0.292392	1.32844	1.40531	1.81908	1.36485	0.234494
ENSMUSG00000002778	Kdelr1	44.8207	26.531	35.6999	40.8285	34.5822	49.1309	28.7626	22.9797	29.81	34.9502	26.5217	31.7792	22.3075	27.0757	37.418	30.2678
ENSMUSG00000002781	Tmem143	15.4135	12.1536	12.269	13.666	14.5264	13.6342	1.78436	8.59548	9.7971	6.35294	5.31466	10.0076	14.9407	18.6719	11.7696	14.6288
ENSMUSG00000002791	Pdxk-ps	0	0.0383396	0.0178589	0.941183	0.50608	0.109953	0.654812	0.0175418	0.0418679	0.593901	0.361191	0	0.0443782	0.105236	0.0354505	0.811711
ENSMUSG00000002797	Ggct	6.62608	5.96181	9.03659	5.76004	8.0598	4.63637	10.0186	6.92901	7.72463	3.99534	8.16979	9.29907	3.04731	5.3069	8.89808	6.80034
ENSMUSG00000002799	Jag2	13.8674	23.0804	9.59021	12.8566	14.9762	9.16279	1.94807	14.1211	14.4444	4.37327	14.2756	4.78238	13.1655	16.1011	9.85525	7.34148
ENSMUSG00000002803	Btbd6	23.9328	24.3265	22.3057	24.339	34.3197	27.4151	7.84138	38.9603	17.2496	32.9705	18.6959	10.8046	21.9968	28.9549	19.356	15.9817
ENSMUSG00000002804	Nudt14	62.7743	64.7556	41.4504	36.932	69.3892	70.3519	33.199	47.7838	65.1674	61.4778	42.6205	47.1596	64.0526	61.2774	32.5968	37.7356
ENSMUSG00000002808	Epdr1	20.1307	16.3327	23.8059	24.7155	16.0071	14.917	53.7273	25.6636	15.5539	17.763	10.4401	20.0299	12.6182	9.98239	20.6499	31.1336
ENSMUSG00000002812	Flii	306.614	319.139	295.475	267.352	285.392	309.061	166.961	296.018	284.22	308.109	257.357	277.024	241.817	303.11	295.25	296.184
ENSMUSG00000002814	Top3a	54.0972	83.0819	73.9	81.3747	94.3371	87.5046	13.6365	59.2562	77.2882	73.5718	73.2701	68.2818	58.4757	65.4719	74.3752	82.8848
ENSMUSG00000002820	Atg4d	38.5102	47.9436	20.6449	22.3437	44.835	46.9135	7.17019	25.804	36.9694	50.5536	35.1043	42.5396	41.538	38.4563	28.0768	36.8697
ENSMUSG00000002825	Qtrt1	52.2356	55.4582	50.3263	48.7156	53.9069	67.658	128.769	39.241	59.1594	56.3666	58.9601	51.3515	64.6739	56.9177	44.4372	54.4388
ENSMUSG00000002831	Plin4	0	0.0383396	0	0	0	0.0183256	0.0163703	0.0175418	0	0	0.0859977	0.0147604	0	0.0150337	0	0
ENSMUSG00000002833	Hdgfl2	83.252	96.3282	127.066	107.728	85.9774	83.0148	14.9788	130.914	105.172	102.709	127.277	131.22	108.949	89.8265	136.697	133.59
ENSMUSG00000002835	Chaf1a	89.2155	122.591	171.499	156.048	141.309	131.193	8.28337	175.593	115.828	115.973	175.986	154.483	121.434	122.119	170.216	179.749
ENSMUSG00000002844	Adprh	135.346	129.856	115.279	120.283	113.849	147.906	87.6139	119.214	134.836	122.038	120.878	132.918	127.173	140.505	107.043	105.072
ENSMUSG00000002845	Tmem39a	30.6377	36.1351	44.2543	31.3226	30.4023	27.7449	5.99153	39.7497	23.9485	15.8734	38.6818	28.1629	17.3963	27.0908	19.5864	38.2947
ENSMUSG00000002846	Timmdc1	4.02298	2.83713	21.3414	14.7766	24.6667	21.4226	13.4891	19.9626	3.16103	3.97734	19.7451	18.4505	22.3075	19.9347	14.5524	17.9118
ENSMUSG00000002847	Pla1a	0.504844	0.249207	0	0	0.0562312	0	0	0	0.0418679	0.323946	0	0	0.236684	0.210472	0	0
ENSMUSG00000002870	Mcm2	752.313	940.604	954.449	882.246	908.246	870.281	23.3604	959.606	874.516	820.357	989.542	795.13	775.48	904.729	872.278	808.501
ENSMUSG00000002871	Tpra1	48.7806	64.4297	66.9708	65.3558	59.4551	75.2081	55.79	67.0096	74.9227	82.3903	66.2011	60.3406	64.023	85.8425	86.7652	64.1432
ENSMUSG00000002881	Nab1	63.2633	65.6949	81.2757	88.1324	69.483	51.0917	47.1956	70.0093	83.8196	76.8112	88.0273	82.3484	80.8424	84.8202	107.787	75.7778
ENSMUSG00000002885	Adgre5	17.9851	18.5755	17.7874	16.0001	29.4464	16.1815	16.9105	13.7352	15.1143	25.9517	11.5065	19.528	19.6152	25.7979	18.5761	23.4855
ENSMUSG00000002897	Il17ra	391.822	447.557	342.908	329.772	491.404	410.548	10.0186	417.039	429.251	482.662	338.883	381.498	393.28	460.528	383.539	364.458
ENSMUSG00000002900	Lamb1	0	0.115019	0.0357177	0.0752947	0.0374874	0.0916279	0.54022	0.157876	0.125604	0.125979	0.0515986	0	0.0295855	0.180405	0.319055	0.018038
ENSMUSG00000002908	Kcnn1	0.583726	0.805131	1.83946	1.80707	0	0.311535	0.0491109	0.0175418	2.99356	0.035994	1.04917	0.0295209	1.30176	0.0300674	0.319055	0.018038
ENSMUSG00000002910	Arrdc2	16.1077	23.6939	24.5381	19.8025	25.4727	12.4797	4.78013	14.3141	23.0483	13.5877	25.3693	21.0779	22.8696	14.3422	8.774	24.0988
ENSMUSG00000002930	Ppp1r17	0	0	0	0	0	0	0	0	0	0	0	0	0	0	0	0
ENSMUSG00000002944	Cd36	104.187	4.3132	15.8944	52.7063	9.31563	8.64967	754.196	24.3831	14.6538	16.6292	1.77155	3.30634	99.4368	63.3521	18.0975	53.1761
ENSMUSG00000002948	Map2k7	41.0502	60.6149	51.255	65.544	52.2762	40.9943	27.4366	55.1865	58.3639	56.0607	57.2401	47.4253	53.5202	63.8783	62.127	50.1277
ENSMUSG00000002949	Timm44	35.4811	48.1545	56.7019	70.0993	38.7245	47.7015	29.2537	49.8187	38.3929	45.8384	64.7219	69.1969	45.3841	60.4656	54.5052	62.7363
ENSMUSG00000002957	Ap2a2	151.485	171.474	177.91	176.528	179.509	138.413	95.6681	183.434	152.818	184.685	180.922	147.914	152.706	163.567	171.581	145.747
ENSMUSG00000002963	Pnkp	71.0569	86.0915	82.9723	69.5911	86.7459	101.872	40.5165	65.1151	77.9372	89.3191	83.3662	94.4225	80.8276	93.7052	82.6883	86.3481
ENSMUSG00000002968	Med25	93.3805	149.064	133.102	108.518	139.509	139.952	25.243	138.826	120.035	149.807	130.269	102.688	130.206	131.5	179.167	125.364
ENSMUSG00000002980	Bcam	11.075	8.51139	3.57177	1.56236	10.8901	14.4222	2.52103	2.91194	9.19001	14.4516	5.26306	3.04065	13.0916	6.70504	0.194978	2.75982
ENSMUSG00000002981	Clptm1	323.747	337.676	261.043	263.531	317.725	309.097	280.472	262.969	339.884	309.315	286.94	288.05	295.204	355.923	269.832	312.743
ENSMUSG00000002983	Relb	18.6477	16.7161	15.1265	8.92242	11.9772	14.5688	25.554	11.139	18.0032	20.0307	6.05424	7.04073	20.9021	18.266	4.67947	6.29527
ENSMUSG00000002984	Tomm40	192.172	221.814	261.311	238.797	205.056	218.093	30.7271	276.494	228.222	191.038	313.169	243.34	196.211	234.586	236.083	295.806
ENSMUSG00000002985	Apoe	1271.31	482.83	570.662	744.344	560.643	432.942	5017.96	664.851	472.166	692.273	360.073	380.716	1042.76	1004.01	640.963	1061.34
ENSMUSG00000002992	Apoc2	0	0	0	0	0.0187437	0.0183256	0	0.0175418	0	0	0	0	0	0	0	0
ENSMUSG00000002996	Hbp1	102.121	111.415	74.2393	70.5134	97.9922	93.4421	121.353	71.553	105.696	111.995	65.3239	73.7579	113.446	107.957	77.1403	80.8825
ENSMUSG00000002997	Prkar2b	132.49	143.601	169.391	201.733	124.065	102.458	40.582	163.261	150.431	142.842	143.737	163.546	146.138	124.284	177.643	166.906
ENSMUSG00000003031	Cdkn1b	8.7559	7.5529	6.53635	5.42122	12.6895	10.3906	1.60429	4.82399	6.28019	5.93901	5.28026	7.88207	7.84016	7.86264	4.71492	4.25698
ENSMUSG00000003032	Klf4	0.678385	0	0.464331	0.188237	0.674774	0.109953	1.29325	0.68413	0.0837359	0	0	0	0.473368	0.300674	0.478582	1.08228
ENSMUSG00000003033	Ap1m1	285.064	360.2	278.938	271.343	315.907	338.51	181.367	308.999	314.114	311.528	339.347	313.541	273.355	344.272	268.839	331.286
ENSMUSG00000003037	Rab8a	273.815	278.595	240.059	252.519	302.355	305.89	521.885	264.478	296.823	271.161	300.511	298.072	310.381	286.543	237.713	252.821
ENSMUSG00000003038	Hmgn2	516.693	686.087	597.397	636.315	628.421	713.854	1677.63	631.732	671.038	531.686	698.628	723.63	647.967	501.525	595.374	557.501
ENSMUSG00000003039	Fam32a	162.797	180.254	164.016	175.135	161.158	156.409	274.432	200.24	194.602	185.981	202.525	219.281	183.075	169.971	188.916	178.468
ENSMUSG00000003051	Elf3	0.96236	0	0.196448	0.621181	0.0374874	0.0916279	6.15523	0.19296	0.20934	0.107982	0	0.0147604	0.872772	0.435978	0.283604	0.487027
ENSMUSG00000003053	Cyp2c29	0	0	0	0	0	0	0	0	0	0	0	0	0	0	0	0
ENSMUSG00000003062	Stard3nl	38.1473	29.4065	25.2167	27.0308	29.7463	23.1452	94.0801	39.5217	27.3607	26.3656	29.6004	33.5505	38.831	26.4443	26.3929	25.1089
ENSMUSG00000003068	Stk11	18.0482	18.8631	22.3414	20.2166	12.6145	10.2257	36.031	31.7156	12.9163	16.1073	13.3812	14.2586	21.0945	13.6807	19.3205	16.3785
ENSMUSG00000003070	Efna2	0.0157764	0.0575094	0.375036	0.056471	0.0374874	0.696372	0.0163703	0	0.020934	0.071988	0.963175	0	0.0443782	0.811821	0.0177253	0
ENSMUSG00000003072	Atp5d	380.195	360.986	319.102	286.703	353.113	411.391	108.028	348.608	326.884	347.396	333.499	315.179	278.799	326.247	326.216	340.504
ENSMUSG00000003099	Ppp5c	128.798	152.975	215.271	186.693	123.521	146.898	84.4053	205.397	175.029	138.577	231.85	183.885	152.41	148.278	179.38	164.128
ENSMUSG00000003119	Cdk12	12.1951	9.89161	17.9482	21.139	9.07196	11.3619	6.59723	12.1214	8.33172	13.4438	8.89217	9.38763	16.1389	18.4614	10.9365	15.0437
ENSMUSG00000003123	Lipe	23.2544	25.8217	28.0563	25.0919	29.3714	23.4567	7.3339	32.2594	27.7794	36.3899	22.2906	23.4838	27.4997	27.3012	21.3944	25.0368
ENSMUSG00000003131	Pafah1b2	197.678	169.787	155.765	185.564	168.637	170.684	109.632	122.459	166.153	144.246	161.985	147.339	169.584	147.526	120.124	142.212
ENSMUSG00000003134	Tbc1d8	14.6405	31.841	24.2523	35.2003	28.6404	15.0086	18.2856	31.0665	28.6795	41.951	25.5241	31.1002	32.1594	19.1379	27.9705	34.2723
ENSMUSG00000003135	Cnot11	55.738	53.2537	59.1664	62.0051	60.0736	64.1028	65.4812	56.7301	58.5523	67.9747	54.7978	66.7171	57.7805	57.4889	56.6677	62.2492
ENSMUSG00000003153	Slc2a3	148.33	191.295	109.814	127.455	210.323	171.454	38.6667	162.876	239.547	239.234	123.527	168.741	209.85	183.126	115.799	118.979
ENSMUSG00000003154	Foxj2	25.0687	50.915	26.8776	37.4967	48.9211	27.1218	26.127	18.6118	24.7439	40.7632	23.7182	36.2811	27.6181	35.6901	38.5702	39.5935
ENSMUSG00000003161	Sri	293.378	250.722	198.091	177.281	237.933	238.067	550.681	208.151	241.034	217.728	205.208	236.875	273.503	246.072	180.798	191.293
ENSMUSG00000003166	Dgcr2	99.2335	125.102	91.5803	123.314	121.572	131.01	21.707	80.2186	98.8711	101.791	98.9834	93.035	101.389	99.9442	106.068	112.9
ENSMUSG00000003184	Irf3	92.3077	87.0692	74.5072	82.1653	78.2175	86.7899	48.849	100.585	74.9645	84.406	88.3369	78.1122	79.156	100.215	68.2777	80.7743
ENSMUSG00000003190	Bcl2l12	32.0576	32.1669	22.6629	18.9743	25.1166	37.1459	20.8067	23.6463	22.19	19.7427	23.1678	28.65	29.053	28.2033	25.6839	24.4596
ENSMUSG00000003198	Zfp959	7.3518	10.6009	10.4474	10.4283	8.22849	10.5922	16.5176	7.20968	16.5797	7.86469	10.0445	15.1737	19.985	8.32868	7.46234	11.4361
ENSMUSG00000003199	Mpnd	147.399	149.218	111.493	97.0548	151.393	137.13	88.7107	99.9005	123.594	140.017	119.485	96.6218	114.437	124.75	117.483	91.7775
ENSMUSG00000003200	Sh3gl1	127.11	161.716	134.156	147.615	144.833	141.968	71.9147	197.503	137.411	166.022	149.946	183.029	158.8	166.213	105.483	141.4
ENSMUSG00000003206	Ebi3	21.0142	15.0675	13.5192	11.1248	17.769	17.2077	25.0138	11.0864	17.2077	18.6629	18.2831	13.4468	17.4259	16.2815	14.6942	12.3741
ENSMUSG00000003208	Yju2	34.2821	43.4963	47.0938	35.7085	42.642	34.9469	42.2845	36.3641	43.1449	41.915	42.8785	44.237	46.819	43.2821	38.8892	40.1887
ENSMUSG00000003226	Ranbp2	58.0571	73.612	141.674	179.145	63.0539	36.1014	65.7431	129.143	78.921	63.0795	101.753	120.194	87.6914	54.6927	165.253	137.955
ENSMUSG00000003227	Edar	0	1.89781	0	2.01413	0	0	0	3.50836	2.03059	0.035994	2.47673	3.89675	6.07982	0	0	0.108228
ENSMUSG00000003228	Grk5	1.08857	0.843471	0.428613	0.131766	2.02432	3.8667	2.45555	1.54368	0.732689	0.485919	0.464388	1.56461	0.547332	0.676517	0.159527	0.144304
ENSMUSG00000003233	Dvl3	54.9965	56.9918	63.7026	64.6593	48.0776	57.6522	18.2365	82.2008	52.8583	69.5404	59.562	51.9715	57.4106	61.0369	72.9749	71.5929
ENSMUSG00000003234	Abcf3	87.0068	112.642	93.6519	72.1699	107.495	113.142	48.5052	98.655	105.8	83.5241	114.343	89.7877	99.5848	107.927	60.4077	101.68
ENSMUSG00000003235	Eif2b5	221.69	224.67	202.912	199.211	196.19	214.098	137.167	232.464	222.34	169.064	227.361	229.746	197.957	211.915	207.74	178.595
ENSMUSG00000003269	Cyth2	41.8232	42.001	39.2359	42.1085	40.299	32.4912	47.2611	38.8726	36.5298	34.1223	38.269	45.0784	37.3813	42.4853	45.0576	35.4087
ENSMUSG00000003271	Sult2b1	0.883478	0.92015	0.94652	0.131766	1.83688	0.788	0	0.68413	1.67472	1.47575	0.515986	1.3432	1.13904	0.481079	2.33973	1.76773
ENSMUSG00000003273	Car11	0.0631056	0.210868	0.0178589	0.0188237	0	0.733023	0.458368	0.0175418	0	0.665889	0.481587	0.0738022	0.0739637	0.451012	0.0177253	1.62342
ENSMUSG00000003279	Dlgap1	0.126211	0	0	0.225884	0.0374874	0	1.24414	0.0175418	0.0837359	0.053991	0.309592	0.0147604	0.0147927	0.0902023	0	0.0360761
ENSMUSG00000003282	Plag1	0.0631056	0.0191698	0	0.0376473	0	0.0549767	0.0818515	0	0.0628019	0.017997	0.0343991	0.0147604	0.133135	0.0601349	0.0531758	0.27057
ENSMUSG00000003283	Hck	20.5251	5.29086	14.3228	14.8142	5.6606	7.58679	109.796	7.66576	3.60064	8.67456	7.84299	10.8489	19.8667	16.1161	15.3146	12.4823
ENSMUSG00000003299	Mrpl4	124.996	144.904	142.049	124.236	129.05	141.822	92.9015	153.613	143.167	124.341	154.005	141.656	114.348	126.358	133.95	128.9
ENSMUSG00000003308	Keap1	136.608	150.617	160.194	146.373	143.464	128.389	59.0477	152.561	134.187	125.961	156.241	139.929	138.948	142.88	129.483	140.137
ENSMUSG00000003309	Ap1m2	1.07279	0.93932	0.0178589	0.884712	1.1996	1.53935	0.933107	0.140334	0.795491	2.24963	0.361191	0.0147604	0.695259	0.105236	1.91433	1.85792
ENSMUSG00000003316	Glg1	129.256	137.332	144.496	148.33	130.194	96.4475	122.253	151.351	131.444	135.086	133.537	112.932	124.718	128.193	171.067	192.682
ENSMUSG00000003341	Atp8b3	1.86161	0.0575094	0.0535766	0.301179	0.0187437	0.0183256	0	0.0526254	0.0628019	0	0.0171995	0.0442813	1.06508	0.0300674	0.0531758	0
ENSMUSG00000003344	Btbd2	106.601	133.115	120.012	123.521	140.465	147.283	21.1177	155.683	122.987	142.374	111.505	93.5221	98.6084	93.63	118.405	140.787
ENSMUSG00000003345	Csnk1g2	245.67	281.662	274.205	301.122	274.858	284.101	51.812	325.067	268.897	259.049	300.184	318.692	268.296	221.672	291.102	279.427
ENSMUSG00000003346	Abhd17a	263.418	284.882	227.629	203.823	286.16	330.557	48.7671	226.201	264.459	269.487	227.584	213.539	239.613	247.786	212.65	214.616
ENSMUSG00000003348	Mob3a	417.065	535.316	414.719	380.972	552.415	561.77	185.23	419.915	555.922	515.254	452.314	453.381	468.042	528.856	374.996	410.708
ENSMUSG00000003352	Cacnb3	0.378633	0	0	0.0752947	0.0374874	0.0183256	0.0163703	0	0.125604	0	0	0	0.103549	0.150337	0	0.018038
ENSMUSG00000003354	Ccdc65	0.283975	0	0.0178589	0.0752947	0	0.0183256	1.37511	0.0350836	0.167472	0.035994	0	0	0.118342	0.0300674	0.070901	0.0901902
ENSMUSG00000003355	Fkbp11	19.9571	10.6776	19.2161	20.9131	12.1647	15.0636	32.4951	20.6818	12.7697	12.6879	23.9246	17.0926	9.61528	13.6807	23.1315	17.4067
ENSMUSG00000003360	Ddx23	6.279	4.61992	5.21479	6.17416	6.29789	5.68093	2.60288	1.28055	3.2029	5.75904	4.23109	9.6238	3.41712	2.91654	5.28213	6.15097
ENSMUSG00000003363	Pld3	175.954	84.0212	58.8093	90.3536	67.7773	91.7195	583.929	88.7264	79.6956	82.3363	46.9892	68.8722	156.034	118.887	60.5495	98.9206
ENSMUSG00000003378	Grik5	8.42459	12.8246	12.8405	13.1389	12.0522	9.85916	0.245555	12.4898	9.9227	20.4446	9.70055	5.40232	9.5857	3.03681	11.2378	5.62787
ENSMUSG00000003379	Cd79a	0.867701	0	0	0.0376473	0.731005	0.256558	0	0	0.020934	0.431928	0	0.0147604	0.207098	1.95438	0.620384	0.468989
ENSMUSG00000003380	Rabac1	263.15	237.073	142.55	135.681	253.659	274.902	124.578	161.42	211.705	256.763	152.973	182.158	230.589	210.081	161.832	175.005
ENSMUSG00000003382	Etv3	48.6228	44.7231	47.9153	31.7179	39.2868	27.8915	59.0313	30.1368	37.1787	43.0848	29.5316	35.8236	48.6829	36.9529	27.1197	35.7875
ENSMUSG00000003402	Prkcsh	119.538	150.962	167.748	193.338	133.005	143.196	84.569	161.034	131.863	146.604	170.104	171.383	142.78	179.172	229.01	197.715
ENSMUSG00000003410	Elavl3	0.141988	0.095849	0.0178589	0.131766	0.0562312	0.109953	0.163703	0.0350836	0.20934	0.089985	0.0343991	0.0738022	0.0887565	0	0.0531758	0.162342
ENSMUSG00000003411	Rab3b	0.0157764	0	0	0.056471	0	0	0.851256	0	0	0	0	0	0	0.0150337	0	0.216456
ENSMUSG00000003418	St8sia6	2.52422	4.65826	3.64321	8.45182	1.66819	0.806325	0.605701	5.50812	3.68438	5.65106	5.28026	7.26213	1.4201	6.43443	21.8552	12.6086
ENSMUSG00000003420	Fcgrt	25.2896	29.1956	12.6619	12.1977	25.0416	24.2631	41.2859	10.9285	23.3414	30.9908	17.1479	24.0152	25.1625	46.6496	9.03988	10.4079
ENSMUSG00000003421	Nosip	124.034	128.668	144.478	130.881	121.159	137.698	157.957	153.28	124.85	119.932	139.196	135.516	122.809	140.445	97.6307	131.822
ENSMUSG00000003423	Pih1d1	131.323	122.495	98.5452	90.1653	115.555	127.253	92.7869	115.513	121.689	91.8387	98.605	116.253	111.301	111.956	99.031	105.685
ENSMUSG00000003429	Rps11	412.979	242.21	224.843	208.434	275.42	322.933	275.807	230.657	260.712	256.493	227.86	226.794	294.346	240.479	211.586	238.697
ENSMUSG00000003435	Supt5	241.679	331.887	315.781	285.461	308.971	321.229	87.5484	247.953	335.048	327.887	309.953	276.507	300.81	321.015	302.216	296.744
ENSMUSG00000003436	Dll3	0	0	0.0178589	0.489415	0	0	0.55659	0	0.0628019	0	0	0	0.0739637	0	0.0177253	0.018038
ENSMUSG00000003437	Paf1	51.3522	80.8965	91.5446	85.2712	66.9526	67.2365	164.767	96.5325	72.2222	65.3291	112.657	115.397	80.0435	90.969	89.4239	85.8971
ENSMUSG00000003438	Timm50	225.334	210.906	186.214	190.778	198.309	229.674	188.7	195.521	228.892	185.045	237.079	197.996	191.788	235.999	197.69	243.369
ENSMUSG00000003444	Med29	18.5688	15.4509	14.9122	11.2001	15.8197	17.0611	14.5532	15.4719	16.3494	16.2333	17.7327	14.4947	16.4347	16.9731	18.5583	17.0279
ENSMUSG00000003452	Bicd1	3.75478	8.83727	12.3048	11.8213	5.45442	2.96874	0.818515	15.9279	14.9887	3.27545	10.4573	13.9929	7.15969	7.8476	8.7031	10.6424
ENSMUSG00000003458	Ncstn	203.547	255.495	229.379	245.046	227.23	259.032	144.632	237.34	235.8	257.177	236.373	205.421	226.225	253.754	246.86	240.339
ENSMUSG00000003464	Pex19	120.8	119.658	103.189	93.7795	95.0307	115.708	99.335	116.688	123.008	106.884	99.1382	99.382	107.588	117.263	102.594	109.419
ENSMUSG00000003469	Phyhip	0	0	0.107153	0.338826	0	0	0.229184	0.19296	0.0418679	0	0	0.0147604	0.0147927	0	0	0.0541141
ENSMUSG00000003476	Crhr2	0	0	0.0357177	0.0376473	0	0.0183256	0.0327406	0.0175418	0	0.035994	0.0171995	0	0	0	0.0177253	0
ENSMUSG00000003477	Inmt	0	0	0	0	0	0	0.311036	0.0175418	0	0	0	0	0	0	0	0
ENSMUSG00000003484	Cyp4f18	4.14919	2.30037	5.76842	2.72943	5.17327	2.67553	13.9802	11.4197	2.82609	4.13931	3.38831	3.52774	1.10946	2.87144	7.32053	3.75191
ENSMUSG00000003500	Impdh1	148.424	205.174	217.646	237.366	186.612	215.949	16.092	254.812	203.311	165.806	217.97	221.096	160.472	202.459	232.697	187.83
ENSMUSG00000003505	Psg18	0	0	0	0	0	0	0	0	0	0	0	0	0	0	0	0
ENSMUSG00000003518	Dusp3	11.2328	4.27486	3.53606	7.15299	5.99799	8.13655	57.9836	6.54309	5.84058	6.69489	4.35149	3.51298	10.4141	10.1027	5.37075	8.063
ENSMUSG00000003526	Prodh	75.8529	85.5548	69.7389	70.9276	91.8255	79.478	22.1981	107.566	92.8003	71.5561	79.0663	91.9722	83.579	79.7088	75.9882	89.5588
ENSMUSG00000003527	Ess2	64.3834	91.9575	63.1132	57.7134	80.7667	71.2865	36.0801	99.497	72.0966	79.0069	75.8672	80.71	83.9636	83.3018	68.7563	53.7894
ENSMUSG00000003528	Slc25a1	151.864	162.234	152.979	134.137	171.336	166.964	76.6621	144.176	143.691	175.219	176.863	144.357	172.883	168.543	141.217	184.313
ENSMUSG00000003531	Dgcr6	93.1123	87.6635	70.0782	54.2686	81.6101	89.3738	50.6988	48.8013	87.9227	86.8535	74.3708	79.913	73.5643	83.4973	61.099	59.4714
ENSMUSG00000003534	Ddr1	2.12981	0.0191698	0.107153	1.16707	0.168693	0.238232	6.90827	0.350836	2.219	0.107982	0.0171995	0.0147604	1.15383	0.977192	0.248154	0.541141
ENSMUSG00000003541	Ier3	20.9037	19.419	12.0547	13.9107	27.3471	21.1294	12.7525	11.2618	23.1739	28.2553	18.0939	26.7459	22.9731	19.8746	15.7223	14.8814
ENSMUSG00000003545	Fosb	2.01938	1.11185	0.642919	0.188237	0.843467	1.09953	0.0654812	0.0701672	0.167472	0.827862	0.0687982	0.0738022	1.03549	0.691551	0.177253	0.505065
ENSMUSG00000003546	Klc4	46.9821	50.5124	37.3786	31.9249	34.7134	38.7769	49.4547	55.1865	40.9678	58.9582	39.903	32.8567	36.8191	47.2961	30.3279	40.4954
ENSMUSG00000003549	Ercc1	36.2857	40.4866	34.5926	30.5696	34.7696	42.1122	87.9249	45.0473	42.161	36.5519	39.2494	39.8827	43.6386	40.7865	30.9306	39.5033
ENSMUSG00000003555	Cyp17a1	0.0157764	0	0	0	0.0187437	0	0	0	0	0	0.0687982	0	0.0147927	0	0	0.0360761
ENSMUSG00000003559	As3mt	83.0627	97.5359	73.2392	72.3205	83.4283	83.9494	168.958	100.427	76.7439	83.2002	83.1254	100.371	100.739	105.612	73.9675	63.8366
ENSMUSG00000003573	Homer3	35.418	36.9785	34.6641	28.6873	33.9636	31.9231	33.8865	30.5227	37.5346	30.4869	27.6053	24.9304	38.9493	30.4884	32.5613	21.0143
ENSMUSG00000003575	Crtc1	73.1393	110.36	89.1336	100.612	82.5661	106.765	9.02004	103.04	96.8196	104.923	70.2774	80.6953	72.3069	112.858	81.5362	59.309
ENSMUSG00000003581	Rnf215	22.5602	19.7065	14.6621	18.9554	22.3613	13.8908	9.20011	17.647	11.1159	19.6347	14.8776	25.2551	21.9228	17.7248	7.62186	12.0314
ENSMUSG00000003585	Sec14l2	1.60919	3.91064	2.48238	4.17885	1.6307	3.83004	0.343776	2.21027	2.07246	3.49142	0.894376	7.0112	4.82243	5.0814	0.957164	3.60761
ENSMUSG00000003604	Aven	37.9422	32.0327	41.6647	48.1509	38.9869	40.4995	7.72678	49.0819	39.7955	32.4486	37.8906	49.9345	41.8487	44.2142	44.4727	48.0353
ENSMUSG00000003617	Cp	2.16137	0	1.14297	1.67531	0.224925	0.183256	14.897	2.50848	0.251208	0.449925	0.240794	0.147604	3.93487	1.50337	4.67947	1.22659
ENSMUSG00000003623	Crot	123.229	116.456	83.2223	88.8477	96.0053	106.472	43.7087	73.1668	134.061	123.405	85.4646	104.888	152.469	102.319	87.1019	83.3718
ENSMUSG00000003644	Rps6ka1	400.91	553.854	545.803	498.3	572.752	518.925	159.054	553.163	551.505	572.575	577.251	568.69	491.03	546.265	535.232	535.567
ENSMUSG00000003657	Calb2	0	0	0	0	0	0	0	0	0	0	0	0	0	0	0.0177253	0
ENSMUSG00000003660	Snrnp200	290.033	348.718	331.818	422.478	414.199	373.017	107.929	252.532	504.383	490.76	314.958	298.102	353.857	364.177	434.783	414.532
ENSMUSG00000003662	Ciao1	59.8714	66.2508	68.5423	71.624	70.4951	65.2024	31.3655	50.5554	74.3784	59.6061	57.6185	64.8426	78.6086	65.4117	65.1226	79.8002
ENSMUSG00000003665	Has1	0	0	0	0	0	0	0	0	0	0	0	0	0	0	0	0
ENSMUSG00000003680	Taf6l	48.8595	55.2665	61.1845	43.3509	63.5787	61.9221	46.6881	64.9748	84.2801	65.0052	50.1367	60.1635	54.7036	66.2987	53.1758	64.1072
ENSMUSG00000003721	Insig2	23.6015	25.5342	26.7526	22.419	27.9656	20.8728	18.0237	19.4363	25.2045	32.9525	23.0474	35.8088	30.3843	24.5651	19.0724	21.2668
ENSMUSG00000003731	Kpna6	28.4133	26.5885	36.8786	36.9697	40.1116	22.5221	27.7968	28.5054	29.1191	37.3258	24.5266	27.1592	25.0589	19.0327	40.8036	30.376
ENSMUSG00000003746	Man1a	206.671	217.673	188.804	157.629	194.485	177.941	93.278	164.226	226.401	215.514	158.58	165.848	193.637	203.842	159.031	180.434
ENSMUSG00000003752	Itpkc	2.49267	6.49856	8.84014	4.25415	10.7776	13.1761	3.24132	5.68354	9.9855	4.48125	7.20661	3.55726	6.30171	4.08917	9.09306	6.38546
ENSMUSG00000003762	Coq8b	28.6815	25.6875	28.6813	23.4355	31.4707	23.7133	6.81005	24.9269	28.9307	31.4588	26.0229	21.4912	21.2128	35.5096	31.3383	34.7232
ENSMUSG00000003778	Brd8	110.293	163.595	192.233	164.745	152.724	129.69	216.808	157.666	143.712	116.009	190.795	194.041	98.712	162.169	155.947	159.402
ENSMUSG00000003779	Kif20a	78.7242	120.712	138.763	124.556	87.3832	93.9369	94.6204	146.491	94.8309	105.264	178.892	165.996	75.4726	90.1873	151.285	156.209
ENSMUSG00000003808	Farsa	231.676	215.948	249.006	240.811	237.295	235.429	58.2455	289.685	240.929	200.253	278.564	241.702	189.599	213.87	249.589	245.443
ENSMUSG00000003809	Gcdh	38.4155	35.8283	32.9139	32.1132	41.0675	40.7561	6.66271	30.6104	30.0193	29.821	33.5391	43.2481	39.3339	36.0509	33.9262	34.8675
ENSMUSG00000003810	Mast2	38.6837	51.4134	66.2564	64.6028	41.8172	55.7647	45.3294	55.2391	38.1626	39.8094	50.6011	58.8056	63.8307	42.3199	61.4358	69.5186
ENSMUSG00000003812	Dnase2a	46.5877	45.049	32.2888	34.692	29.9712	50.1204	29.2701	45.5209	46.2222	49.8697	40.7285	38.7166	33.9198	49.6413	49.1522	46.1413
ENSMUSG00000003813	Rad23a	110.545	103.939	88.1157	101.083	98.0484	91.8294	78.3155	118.705	90.3091	103.843	100.875	95.9428	88.2535	97.644	102.452	125.563
ENSMUSG00000003814	Calr	1594.71	1414.69	2150.35	1925.49	1722.29	1668.78	568.737	1762.34	1460.21	1541.3	2083.85	1834.28	1427.97	1720.88	2297.12	2167.56
ENSMUSG00000003824	Syce2	110.309	87.3759	100.242	90.8806	77.8801	79.3864	443.275	115.443	78.3558	80.0687	111.04	104.223	97.7653	77.7694	98.5702	104.025
ENSMUSG00000003847	Nfat5	2.83975	7.3612	4.87547	11.1813	4.51724	5.31442	10.2969	14.7176	5.10789	2.87952	2.13274	2.28787	2.73666	9.92226	7.48006	2.65159
ENSMUSG00000003848	Nob1	114.915	134.38	124.601	127.643	141.796	129.452	159.119	131.932	148.924	135.589	164.17	134.837	119.718	148.428	154.192	137.414
ENSMUSG00000003849	Nqo1	14.0568	10.6392	12.269	11.9154	10.1966	12.0949	9.593	10.4374	10.153	10.1503	7.32701	8.42821	10.8727	9.51634	8.45495	9.37978
ENSMUSG00000003863	Ppfia3	0.220869	0.287547	0.0892944	0.338826	1.59322	0.513116	0.55659	0.122793	0.90016	0.395934	0.343991	0.103323	0.384611	0.150337	0.212703	0.613293
ENSMUSG00000003865	Gys1	41.3184	56.9151	48.7011	42.7297	77.5428	46.6752	16.0265	32.9084	57.8824	40.5652	50.0163	55.8092	42.4848	41.3427	64.5909	66.4882
ENSMUSG00000003868	Ruvbl2	299.941	328.494	380.126	363.334	331.97	394.165	444.388	444.667	343.882	305.337	438.262	344.877	265.249	359.982	341.832	424.615
ENSMUSG00000003872	Lin7b	0.252422	0.0191698	0.0357177	0.0188237	0.0187437	0.0549767	0.0491109	0.0526254	0.020934	0.017997	0.0171995	0.0295209	0.0147927	0.0150337	0.0177253	0.018038
ENSMUSG00000003873	Bax	55.2489	45.0107	56.9162	49.9956	41.4986	51.6415	83.8814	63.9574	38.372	45.7484	71.7393	55.5878	42.7806	57.2785	50.8715	61.7803
ENSMUSG00000003882	Il7r	11.3432	1.53358	1.83946	7.41652	2.60538	3.92167	66.7417	2.36814	1.59098	4.10332	0.619184	0.501855	9.63008	5.84812	1.87888	5.1228
ENSMUSG00000003923	Tfam	77.1939	55.2473	61.0773	55.1345	44.4414	60.6943	81.5732	56.0986	64.7697	67.9567	61.1616	86.8356	63.949	56.0006	64.13	52.5989
ENSMUSG00000003929	Zfp81	7.03627	8.74142	10.0188	10.3342	10.2903	7.092	18.4493	8.70073	10.5507	7.7927	13.2953	6.89312	8.18039	8.65942	10.5997	7.19717
ENSMUSG00000003934	Efnb3	0.078882	0.0191698	0.0178589	0.188237	0	0	2.78295	0.929715	0.0837359	2.4116	0.584785	0.0295209	0.103549	0.0451012	0.0354505	0.0360761
ENSMUSG00000003948	Mmd	22.9862	15.2208	12.019	16.0189	16.8506	11.875	6.74456	15.2087	15.0306	13.2818	12.0913	15.0409	14.9998	10.2229	15.6514	16.4507
ENSMUSG00000003949	Hlf	132.632	165.071	54.416	84.443	137.26	114.516	17.1397	57.2389	151.143	175.093	67.0094	99.5148	177.543	126.163	55.3205	31.8732
ENSMUSG00000003955	Fam162a	74.575	42.2502	60.3808	55.078	49.0898	54.7202	148.053	56.2214	45.7826	42.9409	66.4247	63.1746	63.165	46.0633	52.7681	56.5492
ENSMUSG00000003970	Rpl8	830.406	587.842	543.642	524.973	669.507	757.854	185.999	542.427	563.814	638.246	551.16	515.198	564.639	571.492	586.015	584.955
ENSMUSG00000003974	Grm3	0	0	0	0	0	0	0	0	0	0	0	0	0.0295855	0	0	0
ENSMUSG00000003992	Ssbp2	93.8064	138.866	123.244	110.344	120.054	127.729	78.692	111.601	150.787	163.017	142.257	116.519	120.709	134.898	125.761	133.932
ENSMUSG00000004018	Fancl	14.8298	22.0836	18.5196	20.9131	16.4757	26.8103	2.76658	19.9801	26.942	20.9665	16.976	22.6277	23.0767	19.7242	13.4535	20.4371
ENSMUSG00000004031	Brinp2	0	0	0.0357177	0.0376473	0.0374874	0	0.622072	0.0701672	0.146538	0	0	0	0.0295855	0.12027	0	0
ENSMUSG00000004032	Gstm5	40.6558	32.2244	27.3062	23.6237	31.452	29.889	73.6009	30.9086	29.3704	34.5363	14.5164	26.6573	35.1476	30.4433	20.8272	42.0286
ENSMUSG00000004035	Gstm7	16.3128	20.2433	8.35795	7.24711	15.0512	15.1003	0.0982218	9.13927	10.2995	30.001	9.06416	6.18462	17.6034	16.6574	7.12556	8.98294
ENSMUSG00000004038	Gstm3	2.46112	2.2237	3.1253	2.31531	2.0993	2.32735	3.87976	2.99965	1.61192	2.87952	3.23352	2.6126	2.75145	2.25506	3.06647	3.53545
ENSMUSG00000004040	Stat3	292.273	434.311	382.966	408.793	433.748	352.786	104.59	445.421	515.394	493.838	400.337	494.725	482.317	564.336	463.338	373.207
ENSMUSG00000004043	Stat5a	247.09	323.375	237.916	300.689	302.73	284.999	27.5185	302.035	320.897	265.672	259.318	306.028	271.595	302.238	282.08	313.248
ENSMUSG00000004044	Cavin1	27.6087	33.7388	16.8409	51.238	27.7594	27.1218	8.43071	20.2608	33.6827	23.81	23.5118	39.1004	37.973	24.0389	21.5007	18.0921
ENSMUSG00000004054	Map3k11	201.117	276.927	209.735	191.757	248.111	220.786	67.8058	219.43	233.225	224.369	237.663	274.943	206.107	237.503	219.297	168.024
ENSMUSG00000004056	Akt2	177.074	265.693	161.426	219.352	238.57	220.896	26.5035	214.361	231.634	217.476	188.61	234.159	206.581	230.753	203.167	181.932
ENSMUSG00000004069	Dnaja3	146.72	148.738	139.085	155.559	155.948	160.294	87.5975	154.017	154.535	129.308	177.654	174.513	139.732	135.664	160.609	152.494
ENSMUSG00000004070	Hmox2	70.8675	68.0528	58.6128	60.104	60.411	53.5656	118.685	74.921	61.5877	67.1288	83.9854	88.1936	100.739	65.4869	55.0192	70.0056
ENSMUSG00000004071	Cdip1	38.0842	51.8735	57.952	41.5438	52.6324	57.7622	21.6579	36.0308	43.9823	56.8165	35.8955	48.2518	32.7807	40.5008	45.1462	36.8337
ENSMUSG00000004085	Map3k20	51.0682	80.954	106.885	106.994	77.3178	58.0188	29.4174	53.748	60.876	54.4769	80.2703	63.337	73.5791	71.5304	77.1758	91.0921
ENSMUSG00000004096	Cwc15	72.4294	67.0943	77.7575	73.1864	65.9591	64.2678	106.145	80.394	60.6457	55.3768	82.1966	81.1233	73.9933	67.9825	77.2821	67.2819
ENSMUSG00000004098	Col5a3	0	0.0383396	0	0.0752947	0.0749749	0.109953	0.0163703	0.0526254	0.020934	0.035994	0	0.0147604	0.0443782	0.0601349	0	0.162342
ENSMUSG00000004099	Dnmt1	528.604	867.011	912.07	947.32	777.921	647.204	135.301	836.849	744.977	781.79	847.628	894.881	749.105	670.88	1044.3	981.251
ENSMUSG00000004100	Ppan	127.505	136.125	170.124	145.225	142.996	133.337	52.5487	169.805	129.749	119.644	174.902	152.446	119.777	150.924	145.081	156.083
ENSMUSG00000004105	Angptl2	12.558	11.521	7.9472	7.86829	15.2012	6.50558	7.48123	6.24488	11.9114	5.25513	4.28269	4.07388	10.1478	7.35149	4.43132	2.88608
ENSMUSG00000004110	Cacna1e	0.0473292	0	0.0357177	0.0376473	0	0.0183256	0.0327406	0	0	0	0.0171995	0.0147604	0.0295855	0.0902023	0.070901	0
ENSMUSG00000004113	Cacna1b	0	0	0.0535766	0.150589	0	0.0549767	0.294665	0	0	0.017997	0	0	1.12425	0.285641	0.124077	0
ENSMUSG00000004127	Trmt10a	11.7376	10.8501	16.4123	15.3978	10.7402	12.9562	26.8473	15.4368	9.12721	17.1152	12.7277	10.8342	9.18629	10.8994	12.2659	9.16332
ENSMUSG00000004151	Etv1	1.34099	0.843471	0.232165	0.320002	1.51824	1.6493	8.20152	0.19296	0.272142	0.143976	1.08357	0	1.34614	0.811821	0.460857	0.432913
ENSMUSG00000004187	Kifc2	0.0157764	0.479245	0.250024	2.03296	0.0749749	0.0183256	0.671182	0.368378	0	0.035994	0.120397	0	0	0.0300674	0.0177253	0
ENSMUSG00000004207	Psap	1845.27	327.746	451.187	1024.72	590.39	559.828	7668.67	513.325	394.836	581.825	283.758	262.913	1333.64	1127.93	560.703	980.728
ENSMUSG00000004221	Ikbkg	68.3118	84.2704	59.0414	64.0381	83.6907	82.9049	34.0339	95.2695	104.858	95.7621	76.7272	62.3776	86.434	107.145	69.7844	61.7803
ENSMUSG00000004231	Pax2	0.347081	0	0	0.150589	0	0	0.0654812	0.0175418	0.10467	0.071988	0	0.0147604	0.059171	0.0300674	0	0
ENSMUSG00000004233	Wars2	11.3748	8.70309	10.8582	13.553	10.534	5.99246	3.3068	11.7355	12.3929	8.83653	13.1921	19.6314	15.9022	7.81753	4.62629	10.0111
ENSMUSG00000004263	Atn1	0.694161	0.421735	0.678637	0.282355	0.880955	0.824651	3.86339	0.333294	0.502415	0.53991	0.670782	0.398532	0.650881	0.571281	0.779912	0.703483
ENSMUSG00000004264	Phb2	322.816	218.555	268.49	253.894	256.433	281.572	186.572	266.898	276.684	248.791	293.063	259.931	259.228	256.16	266.801	284.784
ENSMUSG00000004266	Ptpn6	316.238	359.453	374.233	335.4	366.515	364.642	348.278	420.582	355.542	338.686	436.043	386.9	386.372	408.992	357.767	332.495
ENSMUSG00000004267	Eno2	1.49876	1.016	0.0892944	0.0752947	0.0374874	1.19116	2.99577	1.9296	1.61192	3.04149	0.0171995	0	1.0207	1.06739	0.212703	0.793673
ENSMUSG00000004268	Emg1	161.014	147.435	138.638	119.606	128.807	161.357	152.62	120.337	141.304	136.327	150.41	158.173	128.297	135.003	139.427	120.765
ENSMUSG00000004270	Lpcat3	141.214	127.978	119.315	126.363	163.37	152.414	47.4248	111.794	131.591	137.785	125.574	101.242	117.558	155.449	117.199	128.575
ENSMUSG00000004285	Atp6v1f	173.54	128.936	121.19	116.631	131.187	147.301	319.565	140.948	133.475	134.402	133.125	133.685	149.51	138.085	108.124	113.08
ENSMUSG00000004296	Il12b	0	0	0	0	0	0	0.360147	0	0	0	0	0	0	0.0150337	0	0.0360761
ENSMUSG00000004317	Clcn5	9.27652	8.60724	12.3226	3.5765	14.264	6.34065	30.9071	7.64822	16.3285	9.19647	7.13781	6.14034	10.1034	17.7248	9.51847	9.16332
ENSMUSG00000004319	Clcn3	49.8692	40.1032	33.8426	29.9484	25.7726	34.5437	25.3249	25.2426	41.5749	45.0105	39.5934	22.0226	36.9819	45.1613	32.7031	28.5903
ENSMUSG00000004328	Hif3a	1.04124	2.49207	2.8217	4.81886	0.0187437	1.70428	0	0.0701672	3.01449	3.0235	1.54796	5.93369	0.0887565	3.11198	2.09158	8.89275
ENSMUSG00000004341	Gpx6	0	0	0	0.0376473	0	0.0183256	0	0.0350836	0.020934	0.035994	0	0.0147604	0.0147927	0	0	0.018038
ENSMUSG00000004344	Gpx5	0	0.0383396	0	0	0	0.0183256	0.0163703	0	0.0418679	0.017997	0	0	0	0	0.0177253	0
ENSMUSG00000004347	Pde1c	4.10186	1.87864	2.50024	3.78356	0.262412	0.256558	21.5269	0.947257	5.19162	0.881853	0.0515986	4.26576	3.32837	5.41214	3.68685	4.61774
ENSMUSG00000004356	Utp20	51.1471	49.899	88.9729	112.377	54.0756	49.9189	23.0821	64.6941	54.8261	60.4159	57.4121	86.7028	58.3426	67.5615	92.3132	69.4464
ENSMUSG00000004359	Spic	3.89677	2.62626	3.69679	0.545886	2.51166	2.73051	7.4976	0.263127	1.88406	1.2058	3.40551	0.738022	2.79583	2.20996	1.93205	3.58957
ENSMUSG00000004360	9330159F19Rik	0	0.0191698	0.0178589	0	0	0.0183256	0	0.0175418	0	0	0	0	0.0147927	0	0	0
ENSMUSG00000004364	Cul3	129.13	136.221	189.804	178.448	103.484	101.524	137.805	174.541	132.156	114.857	176.829	188.52	164.318	118.842	188.331	157.833
ENSMUSG00000004366	Sst	0	0.0191698	0	0	0	0	0	0	0	0.035994	0	0	0	0	0	0
ENSMUSG00000004371	Il11	0.0157764	0.0766792	0.0178589	0.0941183	0.0374874	0.0916279	0.229184	0.0175418	0.0418679	0	0.257993	0.67898	0.177513	0.0150337	0.0531758	0.126266
ENSMUSG00000004383	Large1	7.69888	4.56241	1.28584	3.8212	1.18085	1.44772	8.51256	1.43843	2.63768	3.83336	0.429989	1.06275	3.65381	4.41991	2.05613	3.58957
ENSMUSG00000004393	Ddx56	213.502	219.801	207.038	171.145	234.147	233.138	419.833	250.549	266.615	230.74	228.083	224.949	225.19	243.621	200.969	235.811
ENSMUSG00000004394	Tmed4	147.604	148.738	124.28	108.236	135.311	163.116	303.047	116.144	142.33	135.787	117.043	134.482	161.936	135.319	113.105	117.59
ENSMUSG00000004415	Col26a1	0.0315528	0	0	0.0188237	0	0.0183256	0.0327406	0	0	0.035994	0	0.0147604	0.0295855	0	0	0.0541141
ENSMUSG00000004446	Bid	74.8432	94.8521	129.37	115.201	95.7617	96.2459	168.123	137.791	72.8921	91.8027	164.72	141.11	100.398	89.9918	102.789	94.4111
ENSMUSG00000004451	Ralb	37.2165	38.3012	37.5929	48.1133	34.0573	32.1614	98.4674	40.5917	53.2769	37.2718	53.7142	43.2333	46.6563	51.0545	31.3737	50.3802
ENSMUSG00000004455	Ppp1cc	251.491	280.205	248.845	275.258	254.071	279.557	135.71	251.058	271.241	254.73	266.868	294.293	254.184	223.912	237.27	243.676
ENSMUSG00000004455	Ppp1cc	251.491	280.205	248.845	275.258	254.071	279.557	135.71	251.058	271.241	254.73	266.868	294.293	254.184	223.912	237.27	243.676
ENSMUSG00000004460	Dnajb11	89.8465	95.2164	120.315	160.208	88.8265	83.4547	233.162	170.208	102.493	101.269	176.571	174.513	115.309	108.769	143.007	135.917
ENSMUSG00000004462	Tbccd1	33.3355	38.2821	46.8081	52.198	41.6673	31.2634	54.7914	49.1696	54.6586	35.0402	47.9179	68.2522	56.8929	44.2292	37.5598	44.4998
ENSMUSG00000004473	Clec11a	10.1758	15.3742	8.10793	9.18595	15.3511	17.9774	0	11.1566	9.06441	10.0963	15.6516	14.8785	9.60049	14.2069	6.8774	17.3526
ENSMUSG00000004500	Zfp324	16.5652	31.2659	21.2699	29.252	30.1212	27.4151	3.22495	28.7685	26.7745	28.7592	28.792	35.7202	14.5709	41.1623	19.6041	22.5836
ENSMUSG00000004508	Gab2	29.3283	35.1574	45.1294	57.5063	34.8258	19.0036	37.5535	51.1519	25.1208	32.9525	43.0505	51.8829	44.8516	23.0467	42.4875	48.0172
ENSMUSG00000004530	Coro1c	276.197	294.525	323.388	308.087	309.29	324.436	265.379	276.985	347.148	320.221	321.442	367.49	297.6	322.548	273.324	338.195
ENSMUSG00000004535	Tax1bp1	211.12	358.878	485.993	393.904	254.727	229.326	576.267	429.704	301.679	260.435	485.715	490.017	381.372	332.922	443.858	424.958
ENSMUSG00000004540	Psg17	0	0	0	0	0	1.08121	0.0163703	0	0	0	0	0.0147604	0	0	0.0177253	0
ENSMUSG00000004542	Psg19	0	0	0	0	0	0	0	0	0	0	0	0	0	0	0	0
ENSMUSG00000004552	Ctse	233.98	311.797	262.936	282.035	326.459	314.082	149.625	296.158	297.032	370.666	254.158	294.633	293.296	293.263	307.037	367.85
ENSMUSG00000004558	Ndrg2	15.2873	19.8216	10.9653	10.5977	25.8663	17.7758	10.919	4.82399	18.2335	36.9119	10.8185	8.2068	24.7483	21.844	14.6233	6.52977
ENSMUSG00000004561	Mettl17	25.6366	31.8794	33.3782	23.7555	26.3537	24.0065	3.19221	34.3994	31.5894	30.145	34.6915	22.7606	25.9317	21.3328	32.5968	38.0242
ENSMUSG00000004562	Arhgef40	24.0274	42.1352	32.6282	48.7345	40.0741	39.6382	3.71606	37.9078	55.8937	66.6609	23.1162	27.6463	54.8811	44.3344	43.5687	29.9612
ENSMUSG00000004565	Pnpla6	44.9154	59.7522	42.9149	57.3181	51.339	62.3986	9.67485	50.0643	35.9227	42.5989	50.3603	37.6539	32.2926	49.04	41.2999	44.4457
ENSMUSG00000004567	Mcoln1	37.1061	37.3619	44.4686	41.9015	39.0994	43.175	33.8374	33.4171	44.2125	69.8464	44.478	46.1854	45.1918	54.0613	49.3826	42.2451
ENSMUSG00000004568	Arhgef18	110.025	191.621	182.25	224.943	191.448	140.869	26.6509	174.348	148.108	158.392	128.309	171.974	150.117	132.643	151.055	151.375
ENSMUSG00000004591	Pkn2	39.7407	36.9785	65.0956	60.5934	38.5558	31.5566	22.3782	43.1703	57.9871	33.7084	48.6747	42.0525	43.1652	45.5973	44.26	43.7242
ENSMUSG00000004609	Cd33	9.70248	5.50173	6.91138	7.47299	10.6464	12.2781	23.0494	6.19225	4.81481	10.9242	8.13539	4.85618	5.22184	12.7486	1.43575	4.49147
ENSMUSG00000004610	Etfb	45.72	30.0007	32.4853	27.5014	33.9636	37.0177	34.0993	28.5931	40.884	32.3586	31.1484	32.2515	31.5085	29.4511	30.7533	31.0795
ENSMUSG00000004612	Nkg7	365.334	374.309	373.965	373.029	348.933	393.945	464.72	405.97	350.121	319.321	366.626	417.912	363.635	380.939	378.807	381.504
ENSMUSG00000004626	Stxbp2	250.892	285.131	240.738	241.941	291.559	280.216	122.45	227.745	254.557	254.928	276.156	331.062	287.896	326.202	259.976	264.78
ENSMUSG00000004630	Pcp2	0	0.268377	0	0	0.0187437	0	0	0	0	0	0	0	0	0.150337	0.0354505	0
ENSMUSG00000004631	Sgce	15.7764	19.0164	8.84014	9.31771	19.8309	13.5059	43.234	4.85908	17.6683	25.8797	10.1305	10.4947	23.5057	17.6797	9.09306	6.31331
ENSMUSG00000004633	Chn2	14.6878	17.0803	24.4309	13.8166	15.9322	13.5426	17.0742	16.1735	12.5394	13.0298	19.1775	25.2846	13.846	12.3427	13.3826	20.6896
ENSMUSG00000004637	Wwox	25.8102	26.7227	23.913	23.1155	40.9738	26.2239	23.2622	30.6455	37.9323	43.2288	27.9837	31.484	29.9257	30.7139	19.8523	32.3602
ENSMUSG00000004642	Slbp	190.326	202.107	237.13	219.22	178.759	193.94	270.437	229.727	209.34	193.738	234.516	269.083	234.45	208.382	195.722	204.641
ENSMUSG00000004651	Tyr	0	0	0	0	0	0	0	0	0	0	0	0	0	0	0	0
ENSMUSG00000004654	Ghrhr	0	0	0	0	0	0	0	0	0.020934	0	0.0687982	0.0147604	0	0	0	0
ENSMUSG00000004655	Aqp1	73.2971	47.2535	81.2221	129.319	58.143	57.6339	0.0327406	82.0079	19.9919	53.865	42.7065	44.8127	45.2362	44.2893	79.8346	262.886
ENSMUSG00000004661	Arid3b	4.07031	4.92664	8.89372	9.67536	9.10945	3.04204	4.99294	6.96409	9.81803	6.80287	3.61191	5.04807	18.2838	7.50183	6.25702	3.76995
ENSMUSG00000004665	Cnn2	195.485	299.336	228.576	233.677	243.312	247.102	40.4346	253.917	239.171	251.382	231.712	251.606	246.077	258.445	260.03	195.153
ENSMUSG00000004667	Polr2e	199.934	204.446	206.091	176.848	232.291	215.509	151.9	216.325	231.467	231.226	219.105	209.628	208.948	242.298	204.355	234.278
ENSMUSG00000004668	Abca13	0.0315528	0	0.125012	0.0376473	0	0	0	0	0.0418679	0	0	0	0	0	0.0531758	0
ENSMUSG00000004677	Myo9b	118.623	157.748	185.625	227.917	135.011	78.5067	129.718	201.117	125.164	122.614	153.179	119.072	141.019	184.389	171.563	170.045
ENSMUSG00000004698	Hdac9	5.71105	9.16316	5.76842	8.15065	6.76648	3.26195	6.71182	0.526254	18.0451	11.5901	2.88952	1.12179	10.207	10.2831	4.9099	2.38102
ENSMUSG00000004707	Ly9	30.1171	25.1891	41.3611	31.6614	24.2731	23.695	84.127	31.9611	24.5974	12.022	31.9052	32.2663	32.3074	35.7953	26.0384	26.4979
ENSMUSG00000004709	Cd244a	31.8052	33.7963	40.111	35.5203	32.3891	24.6296	19.759	53.6603	36.3623	31.9627	47.1956	46.7168	44.8368	40.2002	35.6101	37.0501
ENSMUSG00000004730	Adgre1	76.547	4.25569	13.037	37.0073	7.7599	7.49516	438.479	17.5593	9.60869	10.3663	1.54796	7.07025	68.5496	41.4329	15.0487	39.7378
ENSMUSG00000004748	Mtfp1	20.2884	20.55	30.0386	24.4519	21.7802	27.5067	31.4801	39.048	19.4895	25.6457	23.3226	22.2882	16.8194	16.8678	24.0355	15.6931
ENSMUSG00000004768	Rab23	14.4038	6.40271	9.7688	10.2589	8.77206	7.092	7.825	17.0331	5.71497	13.8937	10.6809	9.60904	12.1596	6.53967	4.28951	4.81615
ENSMUSG00000004771	Rab11a	114.268	97.7276	74.5786	85.1959	91.4693	96.1543	84.6508	73.7983	94.5587	83.7041	77.9484	79.8539	115.25	86.7446	76.2009	65.6224
ENSMUSG00000004788	Eif2b2	122.882	123.971	132.066	102.495	103.821	143.892	116.426	113.759	142.937	129.596	125.987	134.054	122.366	122.916	118.298	127.403
ENSMUSG00000004789	Dlst	144.78	133.959	167.498	169.827	128.245	143.636	73.8301	139.475	178.671	151.193	170.499	186.395	152.957	112.828	156.23	173.418
ENSMUSG00000004791	Pgf	0.930807	0	0	0	0.337387	0	0.491109	0	0.167472	0.107982	0	0	0.931943	0.0300674	0	0.018038
ENSMUSG00000004798	Ulk2	52.0463	64.1421	65.9885	67.6146	63.7661	56.1862	35.3107	60.6595	60.1642	79.6907	50.2055	57.4771	50.5468	33.3298	59.7873	56.0261
ENSMUSG00000004814	Ccl24	0.0631056	0.0383396	0	0	0.0187437	0.0733023	0.753034	0.105251	0.0418679	0.269955	0.137596	0	0	0.0601349	0.248154	0.18038
ENSMUSG00000004815	Dgkq	2.24025	7.3612	11.1618	8.73418	8.07854	3.50018	4.73102	3.63115	6.25926	9.32245	9.32215	7.54258	6.95259	0.571281	5.28213	10.913
ENSMUSG00000004821	Tmed11	0	0	0	0	0	0	0	0	0	0	0	0	0	0	0	0
ENSMUSG00000004837	Grap	4.35428	1.26521	3.48248	1.46825	1.40578	1.61265	14.766	0.49117	0.20934	1.96167	2.40794	0.0590417	2.07098	3.8787	0.638109	2.23672
ENSMUSG00000004842	Pou1f1	0.0157764	0	0	0	0	0	0	0	0	0	0	0	0	0	0	0
ENSMUSG00000004843	Chmp2b	55.6749	56.2633	55.3625	57.9016	55.5751	59.9063	64.6463	50.7835	60.3317	58.1843	58.7021	70.6139	71.1383	65.983	62.4106	58.1546
ENSMUSG00000004846	Plod3	55.1227	63.2795	108.01	72.5464	76.3057	59.6131	48.1451	128.353	72.7246	54.135	103.782	67.5437	45.7392	64.7202	129.891	115.498
ENSMUSG00000004849	Ap1s1	161.913	158.438	164.48	142.57	157.728	143.068	95.6189	176.769	144.696	130.316	170.448	172.476	148.845	156.26	138.895	160.647
ENSMUSG00000004864	Mapk13	0.126211	0.613433	1.12511	0.263531	0.581055	0.32986	0	0	1.73752	0.773871	2.37354	1.4908	0.0295855	0.796787	3.79321	1.76773
ENSMUSG00000004865	Srpk1	70.2049	94.7754	131.513	128.999	85.8462	83.6929	100.89	97.3218	117.754	88.7072	138.732	118.349	101.641	100.561	122.038	118.636
ENSMUSG00000004872	Pax3	0.0946583	0.0383396	0	0	0	0	0	0	0	0	0	0	0	0.0601349	0.0177253	0
ENSMUSG00000004880	Lbr	624.745	775.648	568.948	568.418	773.085	759.998	89.6438	537.463	737.818	698.23	584.527	579.45	641.162	673.932	618.984	632.377
ENSMUSG00000004885	Crabp2	0.362857	0	0	0.0752947	0.0187437	0.0733023	0.0163703	0.0877089	0.0628019	0	0.0171995	0	0.266269	0.0150337	0.070901	0.018038
ENSMUSG00000004891	Nes	0.0946583	0.153358	0.857226	0.0941183	0.112462	0.0733023	4.89472	0.0701672	0.0628019	0.017997	0.137596	0.0147604	1.03549	0.315708	0.177253	0.396837
ENSMUSG00000004892	Bcan	0.552174	0.115019	0.357177	0.244708	0.224925	0.0733023	1.89896	0.228043	0.0628019	0.035994	0.0343991	0.0147604	0.828394	0.420944	0.106352	0.306647
ENSMUSG00000004894	Hapln2	0.0157764	0	0	0	0.0374874	0	0.360147	0	0.0418679	0	0	0	0.0295855	0	0.0354505	0.378799
ENSMUSG00000004895	Prcc	31.253	42.6144	43.5935	49.2615	37.4312	41.4341	7.44849	52.4149	46.3897	52.4253	37.1166	30.3622	38.8162	41.4931	50.6588	35.8235
ENSMUSG00000004896	Rrnad1	7.84087	14.1665	17.6803	12.5366	8.80955	6.24902	1.50607	16.1911	13.7955	3.07749	14.0004	18.9967	9.89635	9.39608	10.8124	10.8409
ENSMUSG00000004897	Hdgf	522.277	597.887	748.108	755.356	523.343	573.554	230.559	814.781	535.784	566.258	761.906	760.192	525.039	574.318	742.529	835.54
ENSMUSG00000004902	Slc25a18	0.457515	0	0.0357177	0	0	0.0183256	0.52385	0.0350836	0.0837359	0.071988	0	0	0	0	0	0
ENSMUSG00000004929	Thop1	118.402	105.07	160.855	146.919	142.377	124.632	12.3432	176.19	121.668	84.136	162.777	116.799	104.244	110.408	135.261	173.598
ENSMUSG00000004931	Apba3	52.8194	54.2505	56.8091	55.6051	52.3325	56.8276	21.4778	52.257	59.0128	48.07	54.9182	67.5142	47.1889	62.1795	60.1773	52.8695
ENSMUSG00000004933	Matk	128.199	140.285	84.8832	89.13	131.356	124.742	46.9337	99.1287	107.726	127.617	100.686	89.9648	107.706	117.804	101.158	100.021
ENSMUSG00000004934	Pias4	46.6823	60.0014	38.0573	50.4662	49.8208	48.5444	21.5106	60.0105	31.5684	50.0857	41.2101	39.986	40.6061	63.773	49.7725	39.2147
ENSMUSG00000004936	Map2k1	72.7607	71.2925	65.417	81.5629	78.8361	78.9649	110.139	55.7653	72.9967	64.8972	74.3708	82.4665	65.7094	72.1619	90.0266	66.2537
ENSMUSG00000004937	Sgta	190.074	244.261	206.627	182.608	234.296	233.633	137.609	222.553	226.338	164.295	252.885	222.75	204.746	218.786	199.516	181.048
ENSMUSG00000004939	Nmrk2	0	0	0.0357177	0	0.0187437	0	0	0	0.020934	0.017997	0.0171995	0	0	0.0300674	0	0.018038
ENSMUSG00000004945	Tmem242	49.743	38.4354	30.0208	32.1508	34.6946	41.9289	27.1256	40.1356	36.153	35.886	31.3376	36.4583	42.7067	39.3883	25.3649	31.2599
ENSMUSG00000004947	Dtx2	23.7277	38.6655	27.8956	37.1956	34.6384	46.0705	9.28196	30.8385	28.4911	39.9713	26.9517	25.2699	23.6092	35.9005	31.3383	27.6523
ENSMUSG00000004948	Zp3	0	0	0	0	0.0187437	0	0	0.0350836	0	0	0	0	0.0147927	0	0	0
ENSMUSG00000004951	Hspb1	0.631056	0.0575094	0	0.112942	0.431106	0	1.6534	0.0701672	0.20934	0	0	0	0.266269	0.451012	0	0.0721521
ENSMUSG00000004952	Rasa4	68.8797	57.9694	86.3119	46.7768	65.0969	87.4863	89.4146	55.7653	49.7182	69.6844	65.9603	40.8569	51.8634	75.1536	67.3205	54.5831
ENSMUSG00000004961	Syt5	0.126211	0.690112	0.0714355	0.0752947	0.731005	0.513116	0.0163703	0.0175418	0.125604	0.827862	0.120397	0.0442813	1.37573	0.0300674	0.141802	0.162342
ENSMUSG00000004980	Hnrnpa2b1	917.208	949.825	1359.56	1320.65	941.834	974.004	456.502	1193.44	1070.94	889.502	1464.78	1500.87	926.026	1009.08	1188.73	1178.37
ENSMUSG00000004988	Fxyd4	0.236646	0	0.0714355	0	0	0	0.0163703	0.0175418	0.0837359	0	0	0.236167	0	0.0601349	0	0.0721521
ENSMUSG00000004994	Ccdc130	7.33602	15.4125	20.2162	9.31771	12.3521	8.72297	46.3771	15.3841	7.43156	10.5282	23.6322	29.7423	17.6034	15.0939	12.4609	12.5725
ENSMUSG00000004996	Mri1	127.126	144.502	99.9204	75.8217	125.883	122.177	33.7556	122.793	125.96	110.214	91.45	66.1562	111.286	111.355	98.8715	108.066
ENSMUSG00000005034	Prkacb	220.428	262.952	222.825	268.331	258.607	222.821	60.2918	205.397	242.018	282.391	197.365	212.093	221.447	201.617	233.513	206.896
ENSMUSG00000005043	Sgsh	23.002	35.3874	22.2164	22.4378	38.7058	36.3213	8.74174	23.1376	32.4476	39.5754	15.858	13.8453	31.0204	30.3681	14.2511	14.1779
ENSMUSG00000005045	Chd5	4.10186	0.0191698	4.10754	0.112942	1.0309	2.69386	1.26051	5.68354	0.020934	0.089985	2.52833	0.0147604	0.843186	0.0601349	4.94535	1.78577
ENSMUSG00000005054	Cstb	130.66	40.5633	40.0932	59.2381	45.0786	45.649	467.127	51.3799	44.1079	51.9933	39.215	43.1005	100.739	79.0323	40.1477	69.3202
ENSMUSG00000005057	Sh2b2	46.1617	60.5765	70.3104	70.0617	56.6623	76.1427	4.58368	72.1318	74.0016	63.3315	60.2328	55.8387	47.7658	31.7061	101.903	59.2189
ENSMUSG00000005069	Pex5	96.9301	120.712	74.5786	89.3936	97.4298	121.389	34.2794	114.899	133.642	140.215	83.0394	95.4114	85.3541	106.078	112.272	107.597
ENSMUSG00000005078	Jkamp	39.1254	26.4735	26.6276	26.3343	26.2787	27.2501	29.9904	32.8382	31.2544	27.9673	26.9689	41.6392	30.1772	33.886	29.7607	21.0504
ENSMUSG00000005087	Cd44	157.953	155.314	121.887	130.9	141.328	189.212	152.457	121.968	173.208	147.593	123.82	143.102	132.306	152.352	159.634	151.682
ENSMUSG00000005089	Slc1a2	0	0	0.0357177	0.225884	0	0	0.703923	0	0.167472	0.017997	0.0343991	0	0.266269	0.0601349	0	0
ENSMUSG00000005102	Eif2ak4	36.7905	44.3589	72.2034	66.7864	46.3345	32.5279	10.0186	63.3083	62.7182	49.1498	48.0039	61.4034	62.381	47.0405	60.5318	61.7261
ENSMUSG00000005103	Wdr1	665.921	713.174	586.592	563.995	726.769	712.407	523.768	560.46	628.961	679.369	601.812	577.207	579.876	705.442	567.049	511.432
ENSMUSG00000005107	Slc2a9	5.49018	9.29735	2.42881	3.72709	14.4139	4.50809	2.48829	3.08735	2.88889	7.57674	2.02955	0.0885626	5.47332	9.66668	4.96307	2.81393
ENSMUSG00000005124	Ccn4	0	0	0	0	0	0	0	0	0	0	0.171995	0	0	0	0.0531758	0
ENSMUSG00000005125	Ndrg1	249.472	304.531	167.927	199.606	286.666	295.243	27.1092	172.015	269.65	288.924	170.74	219.03	231.329	216.997	249.572	156.913
ENSMUSG00000005131	4930550C14Rik	1.53031	0.268377	0.446472	0.97883	1.23709	0.659721	0	1.01742	0.293076	1.65572	0.791179	0	1.47927	0.375843	0.0177253	0.288608
ENSMUSG00000005142	Man2b1	422.918	456.567	456.241	485.349	609.096	502.066	294.78	439.018	495.653	506.994	481.914	448.51	449.566	663.664	464.579	451.871
ENSMUSG00000005148	Klf5	6.34211	5.42505	4.83975	2.08943	3.61754	2.56558	6.38442	1.66647	3.74718	6.35294	2.63153	5.15139	6.16857	5.71281	0.283604	2.9402
ENSMUSG00000005150	Wdr83	27.8769	26.6652	41.1111	38.7767	34.9758	37.5491	27.5021	32.6102	35.8808	33.8884	38.7162	43.0414	29.7038	25.1364	35.9114	37.934
ENSMUSG00000005161	Prdx2	323.889	325.829	258.132	241.489	315.269	362.92	217.299	277.09	284.367	317.557	259.318	281.171	319.908	299.412	221.513	277.732
ENSMUSG00000005198	Polr2a	198.767	242.325	202.412	230.289	242.056	269.716	78.3483	188.557	237.182	240.422	119.107	115.013	191.107	252.281	218.747	228.47
ENSMUSG00000005202	Shbg	0	0	0	0	0.0187437	0	0	0	0	0	0.0171995	0	0	0	0	0
ENSMUSG00000005204	Senp3	37.043	29.0997	31.8424	29.8732	30.3086	29.0094	20.6266	42.4862	27.2142	18.4469	31.8708	30.3474	28.5648	30.9845	26.836	37.4289
ENSMUSG00000005220	Corin	0.0157764	0	0.0178589	0	0.0749749	0.0183256	0	0	0	0	0	0	0	0	0	0.306647
ENSMUSG00000005225	Plekha8	2.95018	12.6137	8.42939	9.50595	5.41693	7.93497	10.8044	1.87697	8.37359	5.993	9.61455	5.85989	13.9496	6.76517	5.47711	6.98072
ENSMUSG00000005232	G6pc2	0	0	0.0178589	0	0	0	0	0	0	0	0	0	0	0	0	0
ENSMUSG00000005233	Spc25	49.5063	52.8703	56.9698	55.4169	49.1835	40.6828	85.7313	67.15	64.7697	45.0285	71.3609	84.5773	55.0586	44.9809	48.9394	46.8628
ENSMUSG00000005237	Dnah2	0.0631056	0.230037	0.48219	0.56471	0.187437	0.256558	4.94383	0.122793	0.711755	0.17997	0.171995	0.177125	0.251477	0.40591	0.460857	0.234494
ENSMUSG00000005251	Ripk4	0.441739	0.0191698	0.0714355	0.150589	0.131206	0.0366511	1.70251	0.122793	0	0	0	0.0147604	0.281062	0.0601349	0.0531758	0.162342
ENSMUSG00000005262	Ufd1	69.7948	56.7809	70.8819	50.1462	50.0832	68.4827	73.0443	62.4663	56.6473	74.8675	72.8229	62.7761	66.1975	67.0955	48.5495	74.479
ENSMUSG00000005267	Zfp287	2.25602	5.02249	2.71455	0.320002	0.14995	2.21739	2.78295	7.0518	0.0837359	3.68939	3.19912	5.78609	2.36684	2.6309	1.36485	2.23672
ENSMUSG00000005268	Prlr	0	0	0	0.0941183	0.0187437	0	0.0327406	0	0.020934	0	0	0.0147604	0.059171	0	0.0177253	0
ENSMUSG00000005299	Letm1	137.728	185.219	216.217	197.874	175.366	168.852	42.2026	232.955	170.151	173.005	207.444	186.587	162.158	148.563	196.325	170.892
ENSMUSG00000005312	Ubqln1	210.615	238.319	301.815	327.814	253.546	229.968	191.811	302.841	253.364	261.568	326.155	311.947	283.488	269.389	295.391	321.402
ENSMUSG00000005320	Fgfr4	0	0.0383396	0.214306	0	0	0.0366511	0.0654812	0	0.020934	0.035994	0	0.0147604	0	0.0300674	0	0.018038
ENSMUSG00000005338	Cadm3	0	0	0.125012	0.0752947	0.0937186	0.0733023	0	0.0350836	0	0	0	0.0738022	0.0295855	0	0.0354505	0
ENSMUSG00000005339	Fcer1a	11.4694	5.44422	8.28652	5.74122	7.62869	7.2386	22.3782	3.98199	13.0837	10.0243	8.85777	15.4394	10.7691	10.2229	14.712	10.426
ENSMUSG00000005354	Txn2	299.389	266.364	254.364	235.804	306.122	307.815	297.645	296.158	272.728	260.003	291.429	278.293	268.104	293.308	272.81	242.666
ENSMUSG00000005355	Casp14	0	0	0	0	0	0	0	0	0	0	0	0	0	0	0	0
ENSMUSG00000005357	Slc1a6	0	0	0	0	0	0	0	0	0	0	0	0	0	0	0	0
ENSMUSG00000005360	Slc1a3	1.9405	0.0383396	0.375036	0.150589	1.18085	0.0733023	2.73384	0.0701672	0.020934	0	0	0	0.458575	0.435978	0.0354505	0.523103
ENSMUSG00000005362	Crbn	64.0364	55.209	59.8094	56.7722	49.296	47.5182	40.4019	55.4321	53.5909	54.369	52.6134	65.7577	54.1267	55.5346	42.647	47.5122
ENSMUSG00000005364	Il5ra	0	0.402566	0	0	0	0	0	0	2.99356	1.70972	1.56516	0	0.458575	0.0601349	0.070901	0.847787
ENSMUSG00000005370	Msh6	273.468	311.317	310.351	299.993	289.647	310.087	10.4279	239.41	344.468	344.877	268.485	304.685	325.736	363.951	305.814	298.565
ENSMUSG00000005371	Fbxo11	8.17217	6.65192	14.68	8.84712	6.57905	3.2986	32.2495	11.946	7.41062	9.19647	4.28269	6.19938	7.61826	7.18612	5.79616	7.77439
ENSMUSG00000005373	Mlxipl	0.299751	0.0383396	0.392895	0.0188237	0.0374874	0.0916279	0.0163703	0.350836	0.858293	0.89985	0.275193	0.0442813	0.0887565	1.54847	0	0.0360761
ENSMUSG00000005374	Tbl2	80.1441	100.411	122.44	100.951	75.4622	107.718	24.0316	117.723	111.62	111.977	134.604	98.8506	73.5199	109.31	119.716	110.988
ENSMUSG00000005378	Bud23	79.513	94.4304	91.491	100.857	100.129	105.977	50.7479	146.491	97.0708	81.2745	114.239	114.113	91.9073	100.636	110.712	103.737
ENSMUSG00000005397	Nid1	0	0	0.0357177	0.0752947	0	0	0.883996	0	0	0	0	0	0.0295855	0	0	0
ENSMUSG00000005410	Mcm5	849.779	860.532	926.947	776.683	810.572	938.123	162.508	896.824	875.291	794.1	873.737	854.393	721.058	789.902	821.335	749.895
ENSMUSG00000005413	Hmox1	63.0898	6.93946	12.5012	36.932	7.49749	14.8437	363.584	18.5592	8.83413	14.4516	9.25336	6.27318	50.3101	35.0436	10.6883	34.5068
ENSMUSG00000005417	Mprip	119.348	213.034	236.612	312.059	148.6	127.821	54.8241	273.178	164.729	207.595	251.01	262.809	219.924	183.231	292.999	224.05
ENSMUSG00000005442	Cic	23.3806	24.499	27.1276	41.3556	36.1004	25.1793	23.9825	37.9604	23.4879	33.3485	13.9832	18.7162	27.1447	23.1219	34.5288	34.7954
ENSMUSG00000005447	Pafah1b3	59.7925	52.8319	33.2711	35.9155	47.103	63.6814	20.5284	35.066	46.6409	62.4316	36.721	41.5949	55.3545	50.4983	31.6928	34.9757
ENSMUSG00000005465	Il27ra	53.5766	55.8608	30.2529	34.9555	48.8461	56.2229	0	37.4693	44.8824	55.7547	44.3576	40.1927	42.9138	57.2183	47.8759	32.1438
ENSMUSG00000005469	Prkaca	105.434	137.026	112.725	111.794	124.852	128.297	45.9351	132.458	118.696	98.6236	109.974	119.117	123.697	106.604	118.068	129.603
ENSMUSG00000005470	Asf1b	68.5011	115.46	117.94	109.648	90.7571	99.5079	241.396	153.964	94.9355	93.4225	153.575	143.073	96.9812	110.528	107.504	117.193
ENSMUSG00000005474	Myl10	14.8929	4.6966	2.62525	6.09887	7.44126	11.3069	6.10612	3.1049	6.92914	8.74654	6.12304	3.97056	7.42596	6.11872	0.460857	3.49938
ENSMUSG00000005481	Ddx39	307.624	279.323	337.211	308.087	296.619	324.399	550.042	322.471	321.86	287.952	345.453	285.821	290.663	311.454	295.817	280.311
ENSMUSG00000005483	Dnajb1	215.821	222.81	169.606	216.83	244.812	236.95	188.831	219.097	194.183	233.241	185.893	216.167	195.072	195.198	160.148	158.735
ENSMUSG00000005493	Msh4	0	0	0	0.0752947	0.0374874	0.238232	0	0	0.0418679	0	0.0343991	0	0.118342	0	0	0
ENSMUSG00000005501	Usp40	25.7155	21.451	29.1278	19.9343	27.8344	18.1973	12.0158	19.6994	29.8728	23.936	24.2342	30.9674	19.8814	25.6175	23.8759	20.0583
ENSMUSG00000005503	Evx1	0.0157764	0.0383396	0.0357177	0.056471	0.0374874	0.0916279	0.589331	0	0	0	0	0.0738022	0	0.0902023	0.0177253	0.0360761
ENSMUSG00000005505	Kbtbd4	32.31	31.0934	23.8952	16.2448	23.2797	32.0881	14.3404	18.2785	24.5137	32.1966	24.647	23.8971	27.6328	22.9264	22.7061	25.0368
ENSMUSG00000005506	Celf1	105.828	105.53	153.497	175.719	89.7637	91.2247	37.357	123.108	114.279	144.462	128.549	148.844	116.863	111.204	107.805	144.394
ENSMUSG00000005510	Ndufs3	97.2457	92.8968	88.6336	74.3911	85.2089	109.935	255.933	89.0947	82.1867	82.6782	99.5854	99.5443	100.398	86.504	82.6706	98.199
ENSMUSG00000005514	Por	363.409	447.059	295.457	284.482	441.621	420.554	247.404	290.071	412.106	393.487	297.759	349.94	406.741	438.894	327.811	321.744
ENSMUSG00000005533	Igf1r	25.7944	27.5853	25.1274	42.6544	30.7959	18.0507	3.19221	26.6109	30.124	41.843	13.9488	12.6644	28.2541	27.1208	33.8375	48.2157
ENSMUSG00000005534	Insr	8.25105	8.41554	15.2693	8.39535	7.32879	8.28316	6.56449	0.245585	6.92914	11.1042	6.74222	9.80093	5.23663	5.89322	7.72821	9.90288
ENSMUSG00000005540	Fcer2a	0	0.440905	0.821508	0	0.468593	0	0	0	0	0.449925	0	0	0	0.962158	0	0
ENSMUSG00000005547	Cyp2a5	0.0157764	0	0	0	0	0.0183256	0	0.0701672	0.0628019	0	0	0	0	0.0150337	0	0
ENSMUSG00000005553	Atp4a	2.2718	2.56875	2.2145	2.76708	6.52281	2.38232	0.0163703	3.89428	0	0.809865	1.68556	1.16607	3.22482	0	1.25849	9.7225
ENSMUSG00000005566	Trim28	464.599	494.082	492.226	558.573	524.787	548.631	54.5622	443.544	517.069	533.791	412.772	332.744	496.548	586.616	555.421	614.898
ENSMUSG00000005575	Ube2m	262.219	231.724	228.647	239.644	216.509	273.179	284.761	293.509	202.766	234.699	255.534	243.149	232.276	226.739	236.083	231.085
ENSMUSG00000005580	Adcy9	11.0435	9.89161	6.2506	11.6518	10.3278	10.8487	3.51962	7.19213	9.35748	16.7012	2.18434	5.77133	8.74251	7.08088	6.84195	8.29749
ENSMUSG00000005583	Mef2c	131.701	187.078	181.768	192.208	171.73	132.604	55.9537	173.295	165.923	209.233	158.786	147.486	141.108	174.782	195.12	135.159
ENSMUSG00000005609	Ctr9	147.588	217.136	214.878	230.552	179.958	178.289	116.606	197.924	206.786	175.021	258.354	214.528	190.886	156.336	242.73	223.69
ENSMUSG00000005610	Eif4g2	1021.06	1161.46	1496.86	1615.05	1103.07	920.567	681.299	1322.3	1102.8	1135.04	1295.52	1354.28	1367.84	1131.89	1346.15	1278.9
ENSMUSG00000005611	Mrvi1	0.126211	1.24604	8.92944	1.99531	3.69251	0.659721	0	5.94667	0	4.84119	4.14509	4.70858	0.0147927	0.105236	2.19793	2.63355
ENSMUSG00000005615	Pcyt1a	95.6207	110.265	90.0444	94.043	86.0524	92.3426	52.6305	57.9405	99.4991	103.717	72.6509	100.666	82.4991	70.3879	79.4269	94.2307
ENSMUSG00000005621	Zfp592	84.1986	103.44	128.905	123.144	126.052	69.6188	16.403	94.7081	79.0467	109.872	75.764	104.77	68.1798	86.6393	113.761	102.672
ENSMUSG00000005625	Psmd4	247.863	229.712	239.505	216.98	245.899	258.171	467.274	241.656	227.385	205.994	251.733	191.339	248.622	231.579	215.894	260.343
ENSMUSG00000005628	Tmod4	0	0	0.0892944	0.0376473	0	0.0183256	0.0163703	0	0.355877	0.017997	0	0	0.177513	0	0	0
ENSMUSG00000005640	Insrr	0.157764	0.536754	0.0535766	0.0752947	0.0374874	0.604744	0	0.0175418	0.020934	0	0.687982	0.0147604	0.650881	3.53292	0	2.48925
ENSMUSG00000005649	Cabp5	0	0	0	0	0.0749749	0	0	0	0	0	0	0	0	0	0	0
ENSMUSG00000005656	Snx6	109.93	115.805	104.564	110.683	106.877	105.629	432.487	122.038	114.865	96.5899	125.677	157.051	132.129	104.184	84.8863	87.8632
ENSMUSG00000005667	Mthfd2	29.9278	23.6172	39.3431	37.1579	25.1166	28.0931	68.2805	34.8906	31.5475	24.8179	50.1539	47.0267	27.2334	27.7372	41.548	40.297
ENSMUSG00000005672	Kit	995.254	1455.41	1113.95	1197.03	1253.28	1113.66	23.0658	1078.35	1511.06	1408.37	1077.36	1259.17	1338.88	1268.74	1309.91	1199.31
ENSMUSG00000005674	Tomm40l	16.4706	16.8502	9.94739	12.7813	18.1627	18.6738	5.63138	10.0865	15.8261	11.932	16.718	15.8822	16.8489	16.3717	13.9852	14.5206
ENSMUSG00000005677	Nr1i3	0	0	0	0	0	0	0	0	0	0	0.0343991	0	0	0	0	0
ENSMUSG00000005681	Apoa2	0.725714	0.230037	0.0357177	0	0.299899	0.348186	0.0163703	0.315752	0.020934	0	0.309592	0	0.32544	0.0751686	0.319055	0
ENSMUSG00000005682	Pan2	52.4723	102.232	84.7939	70.1746	98.8919	74.1453	6.35168	84.7268	87.0016	96.284	84.7594	61.0934	76.0939	93.3444	51.9882	77.7259
ENSMUSG00000005683	Cs	272.316	283.636	279.295	305.772	305.598	289.746	108.732	271.6	289.998	273.734	292.134	310.618	256.861	289.534	313.666	310.182
ENSMUSG00000005686	Ampd3	14.0725	9.22067	12.787	10.5601	16.2508	12.4431	46.9991	5.03449	9.81803	7.50475	6.55303	15.897	9.74842	19.153	12.904	26.5881
ENSMUSG00000005687	Bcas2	138.911	113.524	113.368	112.076	111.506	110.21	339.717	121.056	126.609	97.2738	123.716	121.803	115.295	95.9151	96.195	117.951
ENSMUSG00000005696	Sh2d1a	0	0	0.0178589	0	0	0	0	0	0.0837359	0	0	0	0	0	0	0
ENSMUSG00000005698	Ctcf	88.1742	130.412	176.035	178.411	105.771	114.626	119.225	189.013	162.385	129.003	201.286	197.303	117.913	124.133	171.811	153.45
ENSMUSG00000005699	Pard6a	17.4014	15.2016	10.5546	14.4566	20.3182	20.6346	10.1987	15.6122	11.1369	12.274	9.68335	14.2881	10.2958	18.6418	11.5391	14.0156
ENSMUSG00000005705	Agrp	0.220869	0.0383396	0.714355	0.320002	0	0	0	0	1.06763	0.143976	0.137596	0.944668	0.266269	0.0150337	0	0.144304
ENSMUSG00000005716	Pvalb	0.0946583	0.115019	0.0178589	0	0.0374874	0	0.52385	0.0350836	1.00483	0.071988	0.0171995	0	0.0147927	0	0	0
ENSMUSG00000005718	Tfap4	17.3383	20.3583	13.6085	22.0802	16.4757	20.2864	1.42422	19.8047	21.1224	15.8734	10.5949	9.55	11.9673	15.169	14.6765	23.7922
ENSMUSG00000005732	Ranbp1	235.084	176.055	211.645	187.71	172.011	193.06	764.166	215.676	200.799	156.88	238.472	232.669	223.296	172.091	194.003	211.135
ENSMUSG00000005763	Cd247	0	0.709282	0.678637	0.0376473	1.74317	2.63888	0	0.122793	1.63285	1.58374	0.687982	1.65317	2.21891	0	0.248154	0.108228
ENSMUSG00000005774	Rfx5	18.9159	30.4033	42.3077	31.9626	24.5918	30.3288	3.71606	31.1367	43.8148	36.4259	27.9665	31.4692	27.0707	32.1571	43.5332	39.1966
ENSMUSG00000005779	Psmb4	229.594	164.592	137.103	152.039	204.419	213.548	166.617	147.895	184.303	159.04	160.713	150.719	166.492	145.932	142.777	159.113
ENSMUSG00000005800	Mmp8	18.8843	1.66777	4.33971	7.77417	2.2305	2.40065	104.148	3.19261	2.219	2.84353	0.687982	2.50927	11.5975	8.10318	5.38848	7.25129
ENSMUSG00000005802	Slc30a4	16.3128	10.9268	5.39338	5.34592	11.7336	11.4352	27.6822	12.5424	20.62	20.4266	8.04939	11.1736	15.562	9.68172	6.46972	4.0766
ENSMUSG00000005803	Sqor	26.031	21.1634	16.573	15.5107	20.9742	17.4643	35.1143	11.6477	15.7423	23.4681	21.5682	18.5243	23.3873	17.394	16.2009	21.5194
ENSMUSG00000005804	Bloc1s6	61.9854	61.8034	64.1133	64.9793	70.9075	75.6296	46.7536	65.9571	66.4025	62.5036	67.2158	69.5216	76.8039	70.6284	62.1448	44.9327
ENSMUSG00000005813	Metap1	59.5085	50.1865	49.5226	51.671	44.8537	39.8948	20.5447	66.7465	65.314	51.8314	54.7806	59.5879	52.7805	45.6724	52.1832	41.9925
ENSMUSG00000005823	Gpr108	121.604	145.614	108.6	112.001	141.89	167.367	57.1324	148.579	127.886	133.466	127.517	126.792	102.869	147.406	113.566	118.077
ENSMUSG00000005824	Tnfsf14	10.4282	11.0801	14.7871	9.84478	8.62211	10.8487	0.0163703	8.77089	13.6071	17.925	15.4108	15.0409	11.7011	8.07311	13.4889	15.2061
ENSMUSG00000005836	Gata6	0	0	0	0.169413	0	0	0	0	0	0	0	0	0	0.0751686	0	0
ENSMUSG00000005846	Rsl1d1	158.6	146.342	238.773	224.886	123.409	121.462	378.694	212.677	192.32	142.752	285.77	269.835	232.779	160.199	192.337	216.24
ENSMUSG00000005864	Cnga2	0	0	0	0	0	0	0	0	0	0	0	0	0	0	0.0177253	0
ENSMUSG00000005871	Apc	7.80931	24.1923	27.4669	47.1156	6.2604	11.7467	16.7959	26.1548	24.9742	22.6942	35.8439	31.6759	22.4554	23.4676	44.7917	35.8235
ENSMUSG00000005873	Reep5	131.607	112.009	117.672	116.255	120.934	136.342	162.443	110.829	109.757	126.915	103.902	91.3966	113.904	119.022	106.015	109.292
ENSMUSG00000005881	Ergic3	208.927	199.826	168.159	141.516	198.084	238.654	113.25	165.542	156	179.52	149.258	156.195	170.338	180.555	155.716	171.289
ENSMUSG00000005882	Uqcc1	61.4333	83.2927	94.7592	111.718	70.4201	65.4589	43.9706	80.2537	92.3188	69.4864	91.6736	108.932	67.6176	97.8244	83.6278	80.0889
ENSMUSG00000005883	Spo11	0	3.60392	0.214306	0.865889	0	2.32735	0	0	0.983896	2.46559	0.842778	1.07751	1.90826	0	0	0.631331
ENSMUSG00000005886	Ncoa2	40.1667	58.7554	97.8488	75.5582	58.1243	53.1442	25.5704	86.2179	62.4041	62.1257	54.7978	63.1008	56.0349	61.954	81.9262	68.5806
ENSMUSG00000005891	Prl4a1	0	0	0	0	0	0	0	0	0	0	0	0	0	0	0	0
ENSMUSG00000005892	Trh	0	0	0	0	0	0	0	0	0	0	0	0.0147604	0	0	0	0
ENSMUSG00000005893	Nr2c2	50.1689	54.8831	72.3106	84.2359	46.0908	45.0259	9.87129	79.3941	53.1932	64.9512	40.9693	47.8976	56.7006	55.9705	53.6544	45.3476
ENSMUSG00000005897	Nr2c1	17.496	22.0453	21.2342	19.2001	25.6602	22.1373	6.69545	31.2595	33.913	22.1363	18.7303	25.137	20.3548	26.1587	23.7696	21.0143
ENSMUSG00000005899	Smpd4	81.8637	93.4336	114.922	104.283	112.537	99.7094	21.7398	126.704	87.9017	84.6039	99.637	85.7138	90.0139	115.73	99.5628	139.903
ENSMUSG00000005907	Pex1	19.7205	18.1921	16.9481	23.5861	22.1363	17.3543	18.8913	20.4186	20.5362	16.0893	12.8997	19.3952	14.8815	16.2815	25.5776	16.8475
ENSMUSG00000005917	Otx1	0.662608	0.0383396	0.0714355	0.188237	0.0749749	0.0366511	2.83206	0.0701672	0.0418679	0.143976	0	0	0.32544	0.210472	0.0354505	0.0721521
ENSMUSG00000005936	Kctd20	224.419	213.091	258.971	256.905	197.128	217.543	39.3378	265.197	191.148	216.414	248.361	214.44	184.687	207.285	234.771	258.016
ENSMUSG00000005947	Itgae	1.59342	0.153358	1.08939	1.3553	0.281156	0.311535	0.0982218	0.894631	0.942028	0.197967	0.103197	0.723261	0.133135	0.721619	0.0177253	1.1364
ENSMUSG00000005949	Ctns	25.6209	27.9304	18.8411	17.6001	22.2488	19.7916	25.554	23.3306	17.3543	21.9024	18.5239	15.4689	23.4021	13.9363	16.1123	19.7697
ENSMUSG00000005950	P2rx5	0.0946583	0	0.0714355	0.056471	0.0562312	0	1.29325	0	0	0.017997	0.103197	0	0.0739637	0.0300674	0.106352	0.126266
ENSMUSG00000005951	Shpk	7.24136	23.6172	9.66165	9.39301	17.3567	17.226	3.60147	11.8758	12.037	18.087	16.804	18.1258	16.1241	14.7932	7.14328	13.1497
ENSMUSG00000005952	Trpv1	0	0	0	0.0376473	0.0187437	0	0.0163703	0	0.020934	0.017997	0	0.0147604	0.0147927	0.0150337	0.0177253	0.018038
ENSMUSG00000005958	Ephb3	0.536397	1.57192	0	0.35765	0.0187437	0	1.76799	0.0175418	0.0628019	0.035994	0.963175	0	0.192306	0.0902023	0.0354505	0.162342
ENSMUSG00000005968	Tuft1	12.7315	13.1505	5.4291	16.4519	12.6145	15.7966	1.32599	7.19213	14.7794	4.35528	12.7449	8.8415	10.207	10.4635	15.8109	10.2636
ENSMUSG00000005973	Rcn1	88.4582	103.862	99.1346	102.645	90.4572	71.5064	80.5583	124.003	97.1755	100.729	118.075	87.5884	106.981	90.969	91.6751	88.6208
ENSMUSG00000005980	Dnase1	2.52422	2.49207	1.62516	3.12473	0	0.439814	0.491109	1.22793	1.84219	1.51175	3.7667	5.34328	0.650881	0.902023	3.42098	1.73165
ENSMUSG00000005981	Trap1	291.09	307.292	386.037	337.828	298.831	299.165	195.412	366.255	293.641	314.732	409.607	358.088	273.917	339.371	310.245	384.048
ENSMUSG00000005982	Naa60	53.9079	66.615	64.6134	62.9463	64.4596	69.5822	16.6813	67.9043	58.343	53.3071	79.9607	71.8095	58.1059	64.4345	63.74	59.9765
ENSMUSG00000005983	1700037C18Rik	7.22559	5.77011	3.98253	4.48003	4.89211	5.00288	0.491109	2.80669	6.21739	4.98517	5.81345	3.74915	5.04433	2.11975	2.72969	3.30096
ENSMUSG00000005986	Ankrd13d	5.30087	5.67426	7.75075	6.45652	4.70467	3.99497	4.1908	3.54344	8.83413	13.2278	3.00992	8.59057	9.80759	6.97565	2.62334	4.38324
ENSMUSG00000005994	Tyrp1	0	0	0	0	0	0	0	0	0	0	0	0	0	0	0	0
ENSMUSG00000006005	Tpr	63.7366	73.7078	204.395	192.717	35.2569	25.2526	244.785	182.522	61.5459	42.8329	190.623	219.65	103.475	49.912	179.894	174.933
ENSMUSG00000006007	Pdc	0	0	0	0	0	0	0	0	0	0	0.257993	0	0	0	0.0354505	0
ENSMUSG00000006010	Odr4	14.4512	17.1761	36.7536	38.2497	14.4139	10.3539	68.8862	34.4872	20.5153	17.5831	35.4139	27.2478	32.5588	17.7097	27.5451	31.8732
ENSMUSG00000006014	Prg4	0	0.0383396	0	0	0.14995	0	0	0	0	0	0	0	0	0	0.389956	0
ENSMUSG00000006019	Dhx34	42.7067	67.2668	48.719	41.6191	67.2712	98.7199	16.8287	39.3287	67.533	68.2806	55.1074	38.6723	52.1444	65.5621	59.3265	61.5638
ENSMUSG00000006021	Kptn	42.2965	40.2566	25.7168	28.4237	39.8304	40.3712	22.6729	23.734	42.8518	31.3148	30.9936	20.9746	37.4404	39.5086	27.0133	21.0323
ENSMUSG00000006024	Napa	209.747	200.171	200.144	203.823	196.547	209.59	376.795	211.414	181.518	205.31	216.405	215.059	238.563	212.487	211.675	212.362
ENSMUSG00000006050	Sra1	51.7623	60.7107	43.79	43.6333	56.3624	59.2649	148.479	52.5903	56.8148	55.5388	45.3036	47.75	48.9196	64.5247	44.0118	50.6508
ENSMUSG00000006056	Calcoco2	0	0	0	0	0	0	0	0	0	0	0	0	0	0	0	0
ENSMUSG00000006057	Atp5g1	220.712	197.621	202.162	225.79	228.242	260.113	364.419	241.603	211.224	189.221	237.509	231.325	198.445	225.491	228.638	278.525
ENSMUSG00000006058	Snf8	82.1319	62.2635	62.7918	61.0451	64.3284	61.5922	67.7894	62.6066	60.3526	49.8337	57.3605	60.8868	64.2597	59.0224	58.0857	65.0993
ENSMUSG00000006095	Tbcb	131.26	104.226	88.1692	87.5112	100.241	96.7407	156.991	100.918	97.008	96.014	109.148	92.2527	99.8954	95.9302	76.8213	94.5012
ENSMUSG00000006127	Inpp5k	160.051	206.976	146.068	129.601	196.359	178.528	73.077	111.671	232.262	184.685	147.366	138.04	166.907	188.357	123.492	106.929
ENSMUSG00000006134	Crkl	119.885	121.268	102.885	113.996	140.765	112.995	33.4773	112.478	102.346	144.624	107.256	98.4521	101.937	125.261	108.762	99.4978
ENSMUSG00000006143	Upk3bl	0.0631056	0.0383396	0.32146	0.658828	0.262412	0.293209	0	0	0.669887	0	0	0.826584	0.177513	0.105236	0.0354505	2.27279
ENSMUSG00000006154	Eps8l1	9.79714	11.9428	6.37562	5.08239	17.5254	12.2965	0.425628	0.0350836	9.35748	11.1221	1.92635	0	14.349	17.9503	0.514033	3.95033
ENSMUSG00000006169	Clint1	258.701	351.593	470.17	375.099	312.42	235.062	159.725	370.412	349.388	356.467	370.255	409.454	305.5	350.451	374.233	359.516
ENSMUSG00000006179	Prss16	1.79851	4.71577	5.30408	5.02592	5.8293	6.89041	0.0163703	2.22781	2.47021	4.1933	5.96824	6.25842	1.46448	3.45776	6.54062	2.85001
ENSMUSG00000006191	Cdkal1	36.2226	30.1349	38.5394	26.052	31.6956	23.3834	20.6593	35.4344	24.4927	25.5378	26.7969	43.8237	39.4966	23.8735	40.1123	40.3511
ENSMUSG00000006200	Rhox6	0	0	0	0	0	0	0	0	0	0	0	0	0	0	0	0
ENSMUSG00000006204	Cdcp3	0.078882	0	0	0.0752947	0	0	0	0.0350836	0.20934	0.089985	0	0	0	0	0.0531758	0.0901902
ENSMUSG00000006205	Htra1	0.631056	0	0.642919	0.640005	0.974673	1.08121	0.229184	1.84189	0.0418679	0	0.429989	0	0.650881	0.12027	0	0
ENSMUSG00000006215	Zbtb17	41.0028	67.1901	61.4524	70.4381	51.8639	58.4952	10.7553	78.0434	59.8921	69.3065	71.2921	73.7136	47.4699	70.0872	90.8597	59.778
ENSMUSG00000006216	Clcnkb	0.0157764	0	0	0.0188237	0	0	0	0	0	0.017997	0	0	0.0147927	0	0.070901	0
ENSMUSG00000006218	Fam131c	0	0	0	0.0188237	0	0	0	0	0	0	0	0	0	0	0	0
ENSMUSG00000006219	Fblim1	17.1647	0.690112	2.01805	11.7836	2.90528	1.06288	86.0096	3.68378	2.0934	1.87169	0.0687982	0.221406	13.5797	10.0125	2.78287	6.80034
ENSMUSG00000006221	Hspb7	0.283975	0	0	0	0.0187437	0	0.163703	0	0.0418679	1.04383	0.0171995	0	0	0.0150337	0	0
ENSMUSG00000006235	Epor	16.4074	17.4828	20.9306	18.7484	7.96608	10.0424	12.998	16.0507	9.02254	19.8867	9.28776	12.443	5.75438	10.0726	23.5569	31.6026
ENSMUSG00000006241	Ccdc159	0.425963	2.14702	0	0.527063	0.431106	0.0733023	0	0.98234	0.0837359	0.971838	0.791179	1.4908	0.133135	1.4733	0.070901	0.0360761
ENSMUSG00000006262	Mob1b	13.6624	14.6457	19.8055	23.2284	15.9509	13.7625	28.2388	11.6127	20.9968	8.96251	14.31	12.5611	18.3578	12.914	12.6027	11.0393
ENSMUSG00000006269	Atp6v1b1	0.0157764	0.0191698	0.0357177	0	0.0187437	0.0183256	0.229184	0.0350836	0.0418679	0.017997	0.0171995	0.0147604	0	0	0.0177253	0
ENSMUSG00000006270	Vax1	0	0	0	0	0	0	0.0163703	0	0	0	0	0	0	0	0	0
ENSMUSG00000006273	Atp6v1b2	276.481	192.906	223.379	263.381	243.949	235.374	1101.74	257.549	215.536	232.539	207.186	183.118	292.941	279.447	218.677	244.578
ENSMUSG00000006276	Eps15l1	74.1964	78.3086	77.1503	73.5817	97.4486	91.4079	39.8781	89.5333	86.4782	88.0234	82.0418	75.4406	82.9577	87.8721	80.455	92.968
ENSMUSG00000006281	Tep1	38.3051	31.7643	25.3596	16.1319	30.8522	24.9778	51.4028	15.7876	33.5153	46.6662	19.8311	18.0963	27.6476	47.6569	19.8168	26.7324
ENSMUSG00000006288	Ttc5	70.0472	125.735	93.4912	92.5748	97.7672	104.163	161.493	103.146	84.636	90.6869	106.74	90.2748	94.9398	87.2407	94.6884	99.624
ENSMUSG00000006289	Osgep	178.431	163.25	137.388	129.469	176.435	198.704	230.101	167.928	141.032	147.18	138.061	131.294	163.401	127.997	144.869	141.599
ENSMUSG00000006299	Aamp	272.726	297.438	262.829	245.894	327.828	302.537	160.265	309.876	281.813	302.53	308.904	302.559	284.953	339.702	273.111	269.164
ENSMUSG00000006301	Tmbim1	123.119	147.914	110.796	98.7113	133.118	146.495	78.4301	112.513	194.037	122.452	127.758	112.593	147.425	171.309	107.38	89.7212
ENSMUSG00000006304	Arpc2	736.268	686.01	692.317	704.099	687.913	636.795	1131.5	722.195	700.848	716.515	736.227	704.84	772.536	702.511	681.767	655.628
ENSMUSG00000006307	Kmt2b	12.4949	12.2878	14.7693	13.986	14.2452	16.2365	3.51962	18.9276	8.89693	19.1488	14.396	10.6423	12.6034	11.5158	6.27474	14.9896
ENSMUSG00000006310	Zbtb32	0.252422	0.498415	0.0178589	0	0.0187437	0	0	0	0.942028	0	0.0343991	1.28416	0.147927	0	0.602659	0.0721521
ENSMUSG00000006311	Etv2	0.0315528	0	0	0	0	0.0183256	0.0163703	0	0.125604	0	0	0	0	0	0.0177253	0
ENSMUSG00000006313	Upk1a	0.0631056	0	0	0	0.0187437	0	0	0	0	0	0.429989	0	0.532539	1.1576	0	0
ENSMUSG00000006315	Tmem147	233.191	171.57	135.852	127.38	176.303	200.024	245.424	142.211	168.079	161.541	169.003	134.025	153.061	159.342	138.629	159.168
ENSMUSG00000006333	Rps9	1313.29	896.054	719.855	657.492	1007.98	1115.51	739.201	682.972	883.748	993.147	676.149	727.689	925.804	898.611	720.745	734.382
ENSMUSG00000006335	Tfpt	23.5857	22.2945	22.2879	23.699	27.5158	20.1765	43.3158	22.471	26.7117	25.9697	24.4062	20.3989	23.0027	25.2867	20.065	27.2915
ENSMUSG00000006342	Susd2	0.0946583	2.93298	1.42871	6.62593	4.89211	0.531442	0.0163703	6.78867	0	1.52975	1.68556	1.60889	0.16272	2.30016	0	4.56362
ENSMUSG00000006344	Ggt5	24.4061	31.611	16.9838	11.2001	23.1672	25.894	3.78154	23.6288	17.0402	34.3203	17.7671	23.0115	33.7275	25.0612	18.2038	13.6909
ENSMUSG00000006345	Ggt1	2.24025	2.30037	0.803649	0	3.22392	3.04204	0.687553	0	0.648953	0	0.928776	0.0147604	0.976321	2.60083	1.71935	0.523103
ENSMUSG00000006356	Crip2	2.06671	2.95215	4.80404	4.64944	3.24266	3.26195	4.6328	2.3506	3.49597	0.197967	5.45226	5.62372	1.12425	1.338	3.74003	8.69433
ENSMUSG00000006360	Crip1	268.845	157.211	133.281	121.375	175.385	209.938	97.8617	134.335	180.493	162.963	156.258	147.959	208.356	138.28	110.375	134.185
ENSMUSG00000006362	Cbfa2t3	149.734	215.104	190.34	190.552	237.764	179.847	12.9489	174.243	204.085	228.22	132.798	165.435	171.729	176.586	190.564	190.482
ENSMUSG00000006369	Fbln1	3.81789	5.31003	2.89314	3.25649	0.449849	10.6105	3.56873	5.52566	0.0837359	0	3.7495	0	0.251477	4.08917	0.177253	3.93229
ENSMUSG00000006373	Pgrmc1	163.065	147.627	128.584	162.844	141.984	175.412	118.586	134.51	150.766	137.983	137.545	160.844	180.516	124.058	131.592	120.097
ENSMUSG00000006378	Gcat	10.0811	5.59758	5.32194	4.14121	7.06638	7.27525	1.30962	6.98163	8.6876	5.21913	6.29503	3.80819	6.83425	5.15657	5.1226	3.0845
ENSMUSG00000006386	Tek	11.5956	38.0904	19.7698	39.1532	43.879	24.2264	0	11.8056	28.9307	41.933	29.824	45.285	30.0293	29.7668	27.6691	16.6852
ENSMUSG00000006389	Mpl	179.946	336.641	113.172	200.077	319.674	263.32	0.687553	135.159	335.53	297.239	146.093	239.37	313.636	296.179	128.774	104.296
ENSMUSG00000006390	Elovl1	200.407	218.612	173.124	170.354	199.939	197.825	236.354	197.398	208.439	200.019	213.429	178.882	186.329	214.231	171.386	237.705
ENSMUSG00000006392	Med8	42.2018	44.4739	64.1669	50.6733	44.5913	43.8531	169.187	66.5711	52.2512	45.9823	67.5082	57.6838	58.1207	43.8834	48.3191	45.6543
ENSMUSG00000006395	Hyi	17.4014	17.3103	12.0726	9.92007	18.4251	22.0457	12.3268	10.1216	13.8164	14.2896	11.1625	8.94482	12.8253	13.1244	11.8405	13.276
ENSMUSG00000006398	Cdc20	206.513	282.582	251.06	253.649	240.782	286.465	215.924	269.898	247.774	258.113	305.189	270.219	206.211	242.749	265.95	298.295
ENSMUSG00000006403	Adamts4	0	0	0.0535766	0	0	0.0183256	0.261925	0.210501	0.020934	0.017997	0.429989	0	0.0295855	0.0300674	0.0354505	0.018038
ENSMUSG00000006411	Nectin4	7.43068	10.39	4.67902	2.25884	12.8957	10.244	5.82783	1.70155	4.91948	14.9375	3.21632	6.02226	10.7247	10.3432	8.57903	2.54336
ENSMUSG00000006412	Pfdn2	76.6102	59.1005	64.5062	60.8004	62.3978	56.5527	67.1019	68.9392	59.8502	46.3423	79.8919	64.8721	66.0496	56.0006	50.1448	61.0948
ENSMUSG00000006418	Rnf114	233.538	245.584	195.59	192.077	221.682	225.258	173.591	157.631	285.916	233.619	198.156	209.982	244.184	226.618	169.79	155.813
ENSMUSG00000006423	C330007P06Rik	39.7407	37.937	39.861	40.9226	44.0665	51.5498	37.046	40.697	43.124	41.4831	37.8218	46.9234	42.825	30.338	40.2718	34.2362
ENSMUSG00000006435	Neurl1a	0.441739	2.68377	0.0357177	1.4306	3.22392	0.769674	6.10612	0.333294	1.29791	2.24963	0.791179	1.99266	0.902357	1.32297	0.106352	2.20064
ENSMUSG00000006442	Srm	346.213	332.979	485.011	403.956	345.409	360.574	279.31	528.078	364.418	331.055	553.929	429.381	313.813	431.889	485.3	493.196
ENSMUSG00000006445	Epha2	0.915031	0	1.96448	0.0941183	2.02432	1.6493	0.0818515	0.0701672	0	0.17997	0.653583	2.40595	0.133135	0.210472	0.0177253	0.0901902
ENSMUSG00000006456	Rbm14	141.025	202.74	175.088	174.062	208.936	191.74	16.4685	191.591	210.554	184.235	213.309	193.007	180.531	215.659	191.309	177.404
ENSMUSG00000006457	Actn3	0	0.0191698	0.0357177	1.29883	0	0.0366511	0	0.0526254	0	0.863856	0.309592	1.417	0.0295855	0	0.0354505	0.0541141
ENSMUSG00000006462	A530013C23Rik	0.0315528	0	0.125012	0.0188237	0	0	0.212814	0	0	0	0.0171995	0.0147604	0.0147927	0.150337	0.124077	0
ENSMUSG00000006463	Zdhhc24	31.9787	29.5023	34.8248	21.4966	38.5933	33.1143	16.1575	22.4359	31.8615	27.8594	30.7872	32.5615	24.5412	25.0011	21.8375	16.6491
ENSMUSG00000006464	Bbs1	3.62857	16.2176	5.67912	9.43066	11.0026	5.6626	1.37511	3.99953	8.7504	11.2301	8.92657	15.9265	8.20997	16.5672	6.71787	4.40128
ENSMUSG00000006469	Slc34a3	0.425963	0.805131	0	0	1.10588	0.0183256	0.360147	2.10501	0	0.017997	0.0343991	0	0	0.165371	0	0
ENSMUSG00000006471	Ndor1	16.4548	16.0259	17.716	15.8307	17.4129	17.9041	1.60429	18.2961	13.6489	15.0455	17.9735	15.2032	14.1123	18.3111	17.9202	14.25
ENSMUSG00000006476	Nsmf	25.8575	30.5758	34.289	27.1625	17.9752	27.6899	8.21789	26.5758	25.6232	22.8922	24.6986	31.2035	27.1743	30.9544	36.8331	19.0482
ENSMUSG00000006488	Prl7a1	0	0	0	0	0	0	0	0	0	0	0	0	0	0	0	0
ENSMUSG00000006490	Prl8a9	0	0	0	0	0	0	0	0	0	0	0	0	0	0	0	0
ENSMUSG00000006494	Pdk1	169.36	184.337	125.851	134.74	183.07	170.391	38.2901	129.458	135.547	172.501	124.336	113.582	167.602	175.068	110.765	98.3975
ENSMUSG00000006498	Ptbp1	372.244	393.019	468.313	443.975	411.931	377.378	62.862	455.823	444.344	401.045	431.279	454.06	380.81	362.298	515.096	378.041
ENSMUSG00000006517	Mvd	12.5265	17.3295	7.78647	6.79534	16.7007	16.8045	10.8371	8.10431	17.7729	10.2043	9.21896	1.85981	20.6803	19.6641	13.223	3.71583
ENSMUSG00000006519	Cyba	335.485	211.75	177.767	201.526	239.02	250.199	833.428	218.764	209.863	219.258	197.485	175.442	269.805	275.703	174.807	242.503
ENSMUSG00000006522	Itih3	0	0	0	0.0376473	0	0	0.327406	0.0350836	0.0418679	0.017997	0.0687982	0.0295209	0.0147927	0	0.0177253	0
ENSMUSG00000006526	Stimate	40.64	44.1289	46.183	43.2944	41.7235	32.9677	5.10753	35.2239	38.4138	45.6764	36.5146	27.4692	40.8871	31.3152	19.356	32.2881
ENSMUSG00000006527	Sfmbt1	25.0687	27.2019	38.4859	39.5862	20.262	25.4359	40.8275	38.0657	21.6876	22.6942	29.91	26.5097	32.3221	23.4676	38.517	28.2115
ENSMUSG00000006529	Itih1	0.0157764	0	0.0535766	0.0376473	0	0.0549767	0	0	0.020934	0	0.0171995	0.0295209	0	0.0451012	0	0
ENSMUSG00000006538	Ihh	0.504844	0	0.0178589	0.0752947	0.243668	0.0549767	0	0.0701672	0.334943	0.017997	0.0687982	1.22512	0.059171	0.0601349	0.0177253	0.0541141
ENSMUSG00000006542	Prkag3	0	0	0.714355	0	0	0	0	0.0175418	0.293076	0	0	0	0.0147927	0	0	0
ENSMUSG00000006546	Cryba2	0.0473292	0.0191698	0.0178589	0	0	0.0183256	0.0163703	0	0	0	0	0.0147604	0.0739637	0.0300674	0.0177253	0
ENSMUSG00000006567	Atp7b	2.42956	3.89147	0.0357177	9.44948	0	6.13907	1.30962	3.17506	0	0	3.40551	2.47975	0.946736	6.17886	3.6514	14.6469
ENSMUSG00000006570	Defb2	0	0	0	0	0	0	0	0	0	0	0	0	0	0	0	0
ENSMUSG00000006574	Slc4a1	0.220869	0.306717	0.0178589	0.225884	0.0187437	0.0366511	0.867626	0.19296	0.0418679	0.143976	0.326791	0.0147604	0.221891	0.0601349	0.0354505	0.018038
ENSMUSG00000006575	Rundc3a	3.17105	3.8723	2.67883	3.67061	3.26141	2.96874	0.736664	4.57841	3.37037	2.3936	1.84035	7.40974	3.00293	3.7434	5.58346	2.95824
ENSMUSG00000006576	Slc4a3	0.299751	0.95849	0.892944	0.0752947	0	0	0.654812	0	0	0.017997	0.0171995	0.0147604	0.133135	0.0451012	0.0886263	0
ENSMUSG00000006585	Cdt1	156.849	188.842	185.107	178.994	207.493	216.26	26.4708	180.487	170.423	170.468	192.738	155.988	146.389	170.467	218.163	165.282
ENSMUSG00000006586	Runx1t1	1.19901	0.460075	0	1.44942	0.0187437	0	1.47333	0	0.0418679	0.917847	0	0.0442813	0.502953	0.0902023	0	0.0901902
ENSMUSG00000006587	Snai3	0.0631056	0.0191698	0.500048	0.847065	0.0187437	0.0366511	0	0	0.020934	0	0	0.0147604	0.0147927	0.0300674	0.584934	0
ENSMUSG00000006589	Aprt	94.7372	77.1584	82.9723	92.0477	77.2803	102.935	104.344	80.5694	88.7391	88.7432	82.1278	67.5142	89.644	80.5958	81.9793	81.9287
ENSMUSG00000006599	Gtf2h1	33.0042	32.3778	65.7921	78.6453	26.5224	26.9569	137.642	56.5196	30.7311	39.8274	72.7369	65.1673	31.834	36.3515	57.7489	57.4872
ENSMUSG00000006611	Hfe	15.5871	13.0546	17.966	15.7366	15.0137	14.0007	22.6729	10.2444	18.2963	19.6167	17.0792	8.78246	13.0028	20.055	14.0916	16.1801
ENSMUSG00000006638	Abhd1	0.0946583	0.0191698	0.0714355	0.20706	0.0374874	0	0.753034	0.0526254	0	0.035994	0.0171995	0.0147604	0.0295855	0.0902023	0	0
ENSMUSG00000006641	Slc5a6	39.2043	31.956	22.5558	39.5673	39.2868	24.9778	4.33813	30.014	44.1288	39.4674	41.2617	35.4103	24.6595	27.1659	32.5081	36.3647
ENSMUSG00000006642	Tcf23	0.39441	0.210868	0.267883	0.150589	0.14995	0.183256	0.0163703	0.19296	0.188406	0.251958	0.670782	0.250927	0.32544	0.300674	0.248154	0.342723
ENSMUSG00000006649	Nphs1	0.425963	0.153358	0.0357177	0.0376473	0	0.0549767	0.0163703	0.0350836	0.167472	0.197967	0.103197	0.0295209	0.0295855	0.0751686	0.106352	0
ENSMUSG00000006651	Aplp1	1.12012	0.728452	0.0535766	0.169413	0.0187437	0.0549767	3.65058	0.0526254	0.0418679	3.16747	0	0.0147604	0.384611	0.135303	0.0177253	0.18038
ENSMUSG00000006673	Qrich1	178.037	214.184	240.488	205.084	210.286	211.88	126.428	199.748	230.441	243.859	245.472	203.192	212.882	213.915	211.906	233.845
ENSMUSG00000006675	P4htm	1.30944	2.10868	3.00029	4.42356	9.65301	5.46102	2.75021	4.47316	4.22866	6.51492	4.09349	1.91886	2.97334	6.26906	3.1551	3.24685
ENSMUSG00000006676	Usp19	277.948	423.346	350.855	317.499	331.089	351.136	77.4806	351.467	404.319	381.644	343.595	319.947	347.245	413.833	318.168	365.288
ENSMUSG00000006678	Pola1	108.904	113.964	160.658	178.505	93.906	89.5937	120.158	110.32	98.0756	83.83	143.135	181.273	119.629	99.9291	201.129	146.649
ENSMUSG00000006699	Cdc42	876.71	773.099	578.556	616.908	746.806	852.744	925.119	575.546	788.603	774.897	595.208	665.223	774.548	685.508	616.892	560.694
ENSMUSG00000006705	Pknox1	72.9343	93.9128	109.118	84.1982	66.8588	93.4238	13.9966	97.5148	77.665	72.222	86.9781	83.7359	77.159	87.5865	77.6366	81.7844
ENSMUSG00000006711	D130043K22Rik	0.157764	0	0.0178589	0	0	0	0.0654812	0	0.020934	0	0.103197	0	0	0.0902023	0	0.018038
ENSMUSG00000006715	Gmnn	58.7513	49.3239	65.0956	59.1628	40.2053	48.746	58.5075	49.7134	45.6988	47.3681	71.4641	67.7209	57.1592	41.929	64.1832	56.2606
ENSMUSG00000006717	Acot13	35.8597	22.2178	25.7346	23.3602	23.0735	30.8969	48.5871	34.1714	23.5926	19.4728	25.2489	24.6942	30.8429	24.4899	19.7814	22.9805
ENSMUSG00000006720	Zfp184	13.0944	15.0866	13.2334	10.353	9.46558	19.4618	20.1846	9.85849	12.8535	10.2943	14.8088	13.2991	13.7573	13.1094	16.8922	18.8497
ENSMUSG00000006724	Cyp27b1	0.0157764	0.0191698	0	0	0	0	0	0	0	0.089985	0.0343991	0	0	0.0150337	0	0.0360761
ENSMUSG00000006728	Cdk4	783.55	684.879	696.871	660.918	727.725	801.066	486.935	750.701	709.62	643.105	721.452	726.42	684.771	733.615	628.821	645.112
ENSMUSG00000006731	B4galnt1	180.955	247.252	355.927	302.44	284.83	233.358	32.8061	322.365	229.311	277.532	340.413	288.67	167.321	290.978	414.044	346.637
ENSMUSG00000006732	Mettl1	20.036	23.8664	32.0388	36.6497	23.8045	29.7241	8.21789	37.9078	27.0048	22.5323	35.2763	30.4655	28.5056	32.0068	34.4402	30.2678
ENSMUSG00000006736	Tspan31	125.58	104.36	103.974	82.3347	106.389	114.04	151.638	99.4444	111.829	104.581	102.784	93.9649	103.638	107.641	103.516	98.7402
ENSMUSG00000006740	Kif5b	40.1667	58.0845	97.6702	121.13	30.0649	20.8728	125.527	88.6036	56.7729	45.7484	112.777	110.998	85.6204	60.3003	110.747	95.5294
ENSMUSG00000006763	Saal1	79.087	66.8451	66.9708	53.1016	78.1238	84.7558	29.6302	53.8884	77.0161	62.7556	57.2917	77.9794	52.6918	72.1017	72.9926	41.7761
ENSMUSG00000006764	Tph2	0	0	0	0	0	0	0	0	0	0	0	0.0147604	0	0.0150337	0.0354505	0
ENSMUSG00000006777	Krt23	0.283975	0	0.0357177	0	0	0.0366511	0.343776	0.0350836	0	0	0	0	0.0443782	0.0451012	0.0354505	0
ENSMUSG00000006782	Cnp	195.864	201.283	186.036	146.9	211.842	207.904	27.0274	161.209	184.386	194.926	159.233	165.878	160.708	223.251	148.396	154.045
ENSMUSG00000006784	Ttc25	0.978136	0.095849	0.267883	0.112942	0.131206	0.201581	3.43776	0.157876	0.502415	0.251958	0.429989	0.118083	0.488161	1.18766	0.248154	0.144304
ENSMUSG00000006800	Sulf2	11.4063	11.7703	17.216	5.34592	12.8769	10.5555	6.07338	2.26289	7.07568	17.907	15.1356	6.53887	4.79285	10.9596	9.92615	6.42154
ENSMUSG00000006818	Sod2	168.019	129.454	130.191	136.415	127.907	133.447	140.785	137.054	132.135	121.462	140.503	153.774	133.578	135.574	149.69	141.617
ENSMUSG00000006850	Tmco6	33.3197	33.4896	20.8413	29.0261	32.5578	38.9052	3.60147	26.2601	41.198	40.8712	27.2957	29.019	31.7304	41.8689	28.9454	22.9263
ENSMUSG00000006906	Stambp	43.4166	36.4993	32.4853	31.9626	40.149	37.7873	13.7674	35.4169	46.7037	35.4721	39.9717	59.7797	44.393	38.4713	36.9926	23.3773
ENSMUSG00000006920	Ezh1	61.9697	82.2384	96.7236	86.2688	88.7702	80.6875	37.5698	53.1165	67.9516	85.9357	73.4937	49.9936	77.2921	47.702	80.7031	66.5603
ENSMUSG00000006930	Hap1	0.236646	1.53358	0.0714355	0	0	1.5027	0.605701	0	0.0628019	0	0	0.0147604	1.36093	0.0751686	0	0.018038
ENSMUSG00000006931	P3h4	2.71354	2.14702	0.339319	1.1106	1.34955	3.48186	0.54022	0.0526254	3.70531	2.57357	1.03197	2.95209	1.76034	1.44324	0.0177253	0.378799
ENSMUSG00000006932	Ctnnb1	328.133	344.213	300.636	372.821	343.685	361.289	187.767	332.61	354.161	325.494	300.253	350.25	320.825	315.422	340.999	319.544
ENSMUSG00000006941	Eif1b	80.3649	51.5284	66.4171	61.6663	52.07	60.8409	51.8611	65.273	58.0918	64.0873	63.0191	87.8688	70.1472	51.28	51.1197	57.3249
ENSMUSG00000006948	Klk4	0.0473292	0	0	0	0.0187437	0	0	0	0	0.017997	0	0	0	0	0	0
ENSMUSG00000006958	Chrd	0.0473292	0.0383396	0.0357177	0.0376473	0.0187437	0	0	0.0701672	0.020934	0.017997	0.0343991	0.0442813	0	0.0150337	0.0354505	0
ENSMUSG00000006998	Psmd2	604.046	707.864	709.104	688.155	688.176	652.409	717.085	750.771	761.41	545.219	749.212	708.205	652.419	690.123	682.706	697.278
ENSMUSG00000007021	Syngr3	0.0157764	0.383396	0.0178589	0.112942	0	0	0.491109	0.210501	0	0.017997	0	0	0.281062	0	0	0
ENSMUSG00000007029	Vars	855.853	1102.61	904.623	893.183	1164.57	1112.66	49.5365	902.069	1022.04	1018.94	906.451	841.005	898.822	1076.31	887.912	981.323
ENSMUSG00000007030	Vwa7	1.81428	1.22687	0.32146	0.489415	0.131206	0.0183256	2.04629	0.0350836	0.10467	0.107982	0.429989	0.797063	1.15383	0.0300674	0.106352	0.342723
ENSMUSG00000007033	Hspa1l	0.0315528	0.0766792	0.339319	0.0188237	0.131206	0.0366511	0	0.0175418	0.20934	0.017997	0.0515986	0.442813	0	0	0.0177253	0
ENSMUSG00000007034	Slc44a4	0.946583	0.115019	0.375036	0.92236	0.318643	0.879627	7.23567	0.368378	0.293076	0.269955	0.980374	0.0590417	1.19821	1.02229	0.425406	0.468989
ENSMUSG00000007035	Msh5	5.55329	7.59124	7.92934	4.2165	8.02231	7.11032	0.867626	4.9117	6.17552	12.6159	4.95347	5.32852	4.21593	13.0944	3.75776	3.319
ENSMUSG00000007036	Abhd16a	208.438	227.66	176.16	187.183	230.454	244.811	89.1854	191.609	226.924	238.712	177.413	188.151	198.637	225.626	155.894	211.839
ENSMUSG00000007038	Neu1	29.77	22.4287	37.325	33.9391	23.6358	25.6558	60.4392	21.7518	20.9968	24.6559	29.308	26.6573	28.4612	35.0586	30.1152	28.5722
ENSMUSG00000007039	Ddah2	64.1941	83.542	42.3434	48.9792	69.5392	63.04	9.28196	59.0983	58.5942	73.8237	43.8932	50.1264	53.6533	65.0359	40.9808	51.7331
ENSMUSG00000007041	Clic1	451.173	437.723	414.236	421.104	427.619	448.592	945.32	478.4	397.997	409.108	457.25	486.843	505.379	438.699	388.006	413.179
ENSMUSG00000007050	Lsm2	84.1197	89.1779	107.868	101.93	94.4309	102.953	91.9684	98.6901	92.1722	90.345	121.205	127.574	81.5228	88.4584	89.9912	110.916
ENSMUSG00000007080	Pole	75.8213	172.356	174.856	216.924	156.51	139.311	14.9133	114.232	138.646	135.265	145.147	114.497	145.516	145.256	212.774	171.091
ENSMUSG00000007097	Atp1a2	0.189317	0	0.0535766	0.056471	0.0374874	0.0183256	0.376517	0	0.0418679	0.053991	0.275193	0.0442813	0.207098	0.360809	0.0886263	0.198418
ENSMUSG00000007107	Atp1a4	0.0315528	0.460075	0.0178589	0.0188237	0.0374874	0	0.114592	0.0350836	0	0.053991	0.0171995	0	0.103549	0.0601349	0.159527	0.559179
ENSMUSG00000007122	Casq1	0	0	0.0178589	0	0	0	0	0	0	0	0	0	0	0	0	0.144304
ENSMUSG00000007207	Stx1a	0.189317	0	2.19664	0.056471	0.112462	0.0366511	0.589331	0.0701672	0	0	1.47916	0	0	1.86418	0.0177253	0.505065
ENSMUSG00000007209	Ceacam9	0.0157764	0	0	0.0188237	0	0	0	0	0	0	0	0	0	0.0150337	0.0177253	0
ENSMUSG00000007216	Zfp775	15.4451	21.681	9.05445	9.29889	19.0249	21.5875	0.0327406	10.9285	19.8245	16.4133	18.3347	10.1699	19.4673	14.2369	6.46972	10.7507
ENSMUSG00000007279	Scube2	0.0315528	0.0191698	0	0	0.0749749	0	0.0163703	0.0526254	0	0	0	0	0.0147927	0	0.070901	0
ENSMUSG00000007338	Mrpl49	50.7369	45.3366	67.578	52.0098	49.7833	52.0996	37.3734	67.3429	50.9951	42.023	61.1444	62.7909	46.6119	54.0162	49.5776	62.6641
ENSMUSG00000007379	Dennd2c	6.02658	2.54958	4.80404	7.90594	1.66819	8.64967	2.65199	6.10454	6.4686	0.575904	5.88225	3.89675	1.8343	6.56974	6.57607	7.01679
ENSMUSG00000007411	Mark3	85.8393	93.1652	112.439	104.584	77.4303	63.7913	29.9413	101.62	102.409	74.4356	99.0694	116.312	82.5731	68.5688	113.477	96.4494
ENSMUSG00000007415	Gatad1	48.8122	47.982	33.5925	53.1392	47.1779	43.5782	62.6328	33.0136	53.256	52.0833	21.121	27.971	65.0437	55.2038	38.2334	47.2957
ENSMUSG00000007440	Pcdha11	0	0	0	0.0752947	0	0	0	0.105251	0	0	0.0171995	0	0.059171	0.150337	0	0
ENSMUSG00000007457	2310003L06Rik	0	0	0	0	0	0	0	0	0.0418679	0	0	0	0	0	0	0
ENSMUSG00000007458	M6pr	327.928	350.385	342.015	362.374	332.101	334.515	556.59	386.077	332.013	344.319	331.315	448.584	355.913	368.476	346.44	340.594
ENSMUSG00000007476	Lrrc8a	1.9405	2.24287	1.71445	2.65414	2.64286	1.35609	14.2913	2.57864	2.3446	2.23163	0.223594	0.324729	2.32246	2.82634	1.29394	2.77786
ENSMUSG00000007480	Mc5r	69.4634	87.6059	64.542	72.3958	74.6937	83.8212	171.217	69.5006	81.9565	90.039	49.5003	47.9862	93.076	80.7461	61.9852	78.0866
ENSMUSG00000007564	Ppp2r1a	419.983	483.155	436.203	415.852	446.588	461.42	163.081	422.196	460.422	444.292	415.868	453.249	423.62	487.649	504.443	436.881
ENSMUSG00000007570	Fance	37.7056	36.4226	34.164	32.8285	41.0487	35.1118	4.86198	46.5735	24.8486	30.8649	34.5195	28.4581	26.5234	30.6538	34.3693	32.0355
ENSMUSG00000007589	Tinf2	34.2821	37.3236	26.9669	33.2991	37.4874	38.3371	5.1239	31.5051	41.3655	27.9493	33.0231	30.9674	30.8577	31.9918	20.5436	33.2802
ENSMUSG00000007591	Tssk4	0.078882	0.383396	0.607202	0.35765	0.0187437	0	0.605701	0.456087	0	0.737877	0.206395	0.0295209	0.147927	0.481079	1.08124	0.0721521
ENSMUSG00000007594	Hapln4	0.0473292	0.0383396	0.0178589	0.0376473	0.0374874	0.0183256	0.0163703	0.0175418	0.020934	0.053991	0	0.0147604	0	0	0.0354505	0.360761
ENSMUSG00000007603	Dus3l	64.8725	95.3889	73.8107	63.1534	85.9212	93.3688	15.077	79.131	76.9533	77.855	67.7662	81.0938	75.8572	99.403	77.4417	72.1882
ENSMUSG00000007610	Gtpbp3	37.6109	34.5631	19.2876	22.9837	22.9985	28.2031	6.4499	16.1735	33.4315	35.3281	30.6668	26.7754	21.124	37.8699	32.2777	19.0121
ENSMUSG00000007613	Tgfbr1	62.301	64.4297	55.0053	55.2851	78.8548	69.0324	80.6237	57.6072	52.7117	71.0702	44.65	69.5659	64.2153	69.6362	52.8567	62.7363
ENSMUSG00000007617	Homer1	3.69168	3.12468	3.98253	8.15065	2.5304	2.10744	11.1318	5.49058	2.47021	1.70972	3.59471	3.80819	4.39345	5.18663	7.90547	0.937978
ENSMUSG00000007646	Rad51c	8.45615	3.81479	5.53625	7.41652	4.59221	2.21739	0.294665	5.666	6.86634	4.84119	2.83793	6.83408	1.77513	7.42666	4.94535	2.32691
ENSMUSG00000007653	Gabrb2	0	0	0	0	0	0	0	0	0	0	0	0	0	0	0.0354505	0
ENSMUSG00000007655	Cav1	0.504844	0	0.0535766	0.188237	0.0749749	0	3.5851	0	0.146538	0.071988	0	0	0.502953	0.360809	0.283604	0.342723
ENSMUSG00000007656	Arpp19	118.402	98.0535	95.0806	105.902	108.076	88.934	225.386	102.374	116.372	107.928	98.0718	114.63	117.085	77.2733	100.697	90.3705
ENSMUSG00000007659	Bcl2l1	62.0959	46.7551	40.8432	68.1793	45.8096	58.9534	137.625	51.7307	65.8373	67.5428	42.6205	44.8569	70.2212	67.7269	49.418	50.6508
ENSMUSG00000007670	Khsrp	251.728	272.096	210.056	248.021	355.943	285.824	36.0147	180.259	297.744	281.167	220.601	214.321	201.803	268.953	303.864	263.463
ENSMUSG00000007682	Dio2	4.68559	2.95215	6.98282	5.91063	4.40477	3.0787	1.06407	5.78879	4.20773	5.14714	5.69305	11.0408	1.58282	0.962158	3.5096	3.15666
ENSMUSG00000007721	Ccdc124	82.9996	80.2256	108.189	78.6641	70.2327	80.8707	185.999	97.7429	78.8164	65.0592	107.979	85.6843	81.4932	82.1743	93.7844	103.538
ENSMUSG00000007739	Cct4	515.352	411.288	407.289	388.389	422.034	442.159	507.185	386.077	422.615	411.448	424.571	478.223	470.557	382.037	375.829	437.963
ENSMUSG00000007777	0610009B22Rik	42.9749	23.5022	22.145	20.819	26.9722	27.4884	138.395	28.7685	29.3285	26.5816	22.1014	27.3806	33.8754	23.1068	20.7386	20.6896
ENSMUSG00000007783	Cpt1c	0.110435	1.53358	0.142871	0.131766	1.06839	0.0366511	0.0327406	0	0.10467	0.071988	1.49636	0.0295209	0.843186	1.84915	0.939439	0.559179
ENSMUSG00000007805	Twist2	0	0	0	0	0	0	0	0	0	0	0	0	0	0	0	0
ENSMUSG00000007812	Zfp655	70.7413	68.2445	55.4339	65.1487	64.7033	49.2591	41.7443	51.7658	69.2914	43.5168	51.6846	70.3482	59.7923	72.658	48.5318	52.7973
ENSMUSG00000007815	Rhoa	324.063	243.514	181.143	233.715	259.394	271.86	231.722	176.295	247.125	244.507	187.595	230.971	267.675	222.033	232.892	220.605
ENSMUSG00000007817	Zmiz1	109.362	154.47	176.553	233.809	149.125	177.117	93.4417	189.346	139.127	165.41	132.144	138.689	117.469	118.255	182.233	154.333
ENSMUSG00000007827	Ankrd26	3.80211	9.6424	29.1993	13.5907	4.17985	6.02911	1.96444	20.5941	19.4686	4.87719	25.9885	12.9449	8.66855	3.8787	21.1994	20.7257
ENSMUSG00000007833	Aldh16a1	195.596	238.626	160.873	159.041	258.645	236.95	20.9704	191.767	245.869	226.564	166.285	187.472	163.016	223.912	182.109	164.741
ENSMUSG00000007836	Hnrnpa0	31.0953	17.9813	31.7531	33.4496	30.646	26.4805	16.0102	31.0139	19.6989	31.6387	23.615	21.8159	25.4287	16.5221	36.4254	27.977
ENSMUSG00000007837	Prrg2	10.6964	10.5626	8.07221	7.83064	13.6267	12.2048	11.0827	11.6828	10.781	6.49692	9.15016	9.71236	15.5028	6.25403	8.45495	11.5263
ENSMUSG00000007850	Hnrnph1	117.029	109.536	143.085	144.829	105.958	108.103	33.0844	86.1828	110.469	91.6048	110.817	136.431	91.1825	92.4273	124.485	102.456
ENSMUSG00000007867	Ift43	0.915031	0.191698	1.55372	0.92236	0.468593	0.989581	2.94665	1.47351	2.0934	1.11581	1.54796	0.324729	2.14495	1.90928	0.230428	0.901902
ENSMUSG00000007872	Id3	1.12012	0.498415	0	0.20706	0	0.0733023	3.76517	0.175418	0	0.125979	0.206395	0.67898	0.236684	1.00726	0	0.0721521
ENSMUSG00000007877	Tcap	0.0157764	0	0	0	0	0	0	0	0	0	0.0171995	0	0.0147927	0.300674	0.0177253	0
ENSMUSG00000007880	Arid1a	96.7724	149.601	132.87	159.681	138.497	127.583	25.4722	160.402	105.047	177.738	110.06	100.917	98.8451	142.144	162.47	187.992
ENSMUSG00000007888	Crlf1	0	0.0383396	0	0.0376473	0.0374874	0.0183256	0	0.0175418	0.146538	0.017997	0.137596	0.398532	0.0295855	0	0.0354505	0.216456
ENSMUSG00000007891	Ctsd	1249.77	313.349	388.288	666.621	340.986	344.631	5670.03	468.787	375.681	432.9	279.751	265.26	1067.84	807.972	460.485	768.925
ENSMUSG00000007892	Rplp1	637.193	340.11	296.564	259.879	418.51	461.42	251.202	264.916	341.286	353.641	268.863	261.186	375.943	313.062	290.233	313.663
ENSMUSG00000007907	Cabs1	0	0	0	0	0	0	0	0	0	0	0	0	0	0	0	0
ENSMUSG00000007908	Hmgcll1	0	0	0	0	0	0	0	0	0.0418679	0	0	0	0	0	0	0
ENSMUSG00000007944	Ttc9b	0	0	0	0	0	0	0.196444	0	0	0	0	0	0	0	0	0
ENSMUSG00000007946	Phox2a	0	0	0	0.0752947	0.0187437	0	0	0.0350836	0	0	0	0.0295209	0	0	0	0
ENSMUSG00000007950	Abhd8	115.389	129.99	77.5254	72.0946	106.596	111.291	10.7553	78.5697	115.241	139.315	104.848	101.581	83.3127	114.737	85.5067	74.8759
ENSMUSG00000007987	Ift22	32.4047	26.6077	33.3068	29.3649	28.3218	26.5538	42.4155	20.7695	30.3752	36.8219	35.7923	32.8715	21.5826	22.6708	32.3841	27.8688
ENSMUSG00000007989	Fzd3	2.22447	2.89464	2.00019	1.73178	4.77965	0.476465	1.76799	4.40299	5.38003	3.77937	2.06395	8.42821	6.9378	2.99171	0	0.649369
ENSMUSG00000008028	1700008O03Rik	0.0473292	0.210868	0.571484	0	0.0937186	0.109953	0	0.49117	0.439613	0.17997	0.0687982	0.118083	0.118342	0	0.177253	0.126266
ENSMUSG00000008035	Mid1ip1	45.7042	51.6242	47.0045	42.6356	45.9596	37.8057	50.8953	43.9597	28.847	35.2021	47.5224	40.0893	46.8042	40.7113	38.8361	43.5799
ENSMUSG00000008036	Ap2s1	208.69	149.429	155.729	141.177	143.09	181.038	149.968	151.684	143.858	122.578	159.354	145.671	137.72	149.15	148.024	131.028
ENSMUSG00000008090	Fgfrl1	9.79714	14.339	13.4834	18.7484	11.1525	13.6526	5.10753	13.0335	12.8325	24.026	10.0273	12.3988	11.3608	16.4319	11.6278	12.7709
ENSMUSG00000008129	4930432K21Rik	2.42956	3.41222	4.96477	1.93884	6.67276	6.70716	0	2.99965	1.33977	1.09782	3.9387	3.38014	3.69819	0.631416	6.91285	2.34494
ENSMUSG00000008136	Fhl2	0.631056	2.8563	3.44676	1.60001	3.56131	1.94251	1.08044	0.578879	2.93076	0.971838	1.65116	1.74173	4.65971	1.83411	0.992615	0.829749
ENSMUSG00000008140	Emc10	321.397	332.385	289.171	257.432	332.514	384.819	88.6452	301.947	300.109	311.708	269.035	275.636	306.003	325.074	274.369	255.869
ENSMUSG00000008153	Clstn3	103.036	160.106	77.311	95.8501	140.166	150.196	0.982218	59.8175	154.2	181.122	84.7766	140.416	124.052	144.158	78.1507	92.5892
ENSMUSG00000008167	Fbxw9	13.9621	12.422	11.2154	14.5319	17.0568	23.2735	8.62715	8.9814	21.5201	14.7036	15.6172	16.0446	18.0028	14.9886	9.66027	8.73041
ENSMUSG00000008193	Spib	0.0315528	0	0.0178589	0.0376473	0	0.0366511	0	0	0	0.017997	1.01477	0.0147604	0.0443782	0	0.0177253	0
ENSMUSG00000008200	Fnbp4	32.2469	43.5921	71.2212	54.7204	35.7443	31.5933	18.0237	67.0447	50.7649	41.7531	41.0553	36.5321	32.5588	32.8336	50.6943	38.5473
ENSMUSG00000008206	Cers4	25.4789	57.5669	30.2172	25.5437	49.371	46.1071	21.0195	28.1546	50.1787	47.6921	29.4628	38.2738	62.884	47.8223	32.6677	25.9567
ENSMUSG00000008226	Scrn3	8.44037	10.8884	11.5011	16.3389	8.47216	9.12613	17.7127	13.0335	9.16908	11.3021	19.5043	16.8417	8.59459	13.4401	17.0517	19.3909
ENSMUSG00000008301	Phax	56.3848	56.1867	58.5057	52.8192	55.3877	50.5419	103.346	45.556	68.8309	59.7681	65.2551	70.2154	75.2211	58.7518	57.8553	65.5502
ENSMUSG00000008305	Tle1	31.7579	35.2724	13.7513	24.3955	28.3967	28.0931	23.2949	23.1376	27.6747	27.9134	30.942	32.5467	25.8725	47.702	36.9394	23.0706
ENSMUSG00000008307	1700109H08Rik	0.378633	0.268377	1.8216	0.715299	0.0937186	0.16493	4.60006	0	1.0467	0	0.619184	0.236167	0.16272	0	1.45347	0.234494
ENSMUSG00000008318	Relt	45.9093	59.8673	40.361	40.4332	37.8061	48.4711	0.55659	44.1351	71.4267	44.4346	50.0507	39.6465	42.3073	37.9752	29.5126	34.2542
ENSMUSG00000008333	Snrpb2	32.4363	37.5153	38.9502	39.3603	36.0067	34.5071	66.7417	33.4697	36.9903	31.2788	42.4485	41.772	41.0795	27.4516	39.3678	34.8134
ENSMUSG00000008348	Ubc	268.688	341.261	186.375	201.074	344.941	348.277	278.05	194.381	354.412	320.653	191.809	189.583	383.398	402.122	202.724	210.829
ENSMUSG00000008373	Prpf31	125.99	162.33	199.698	188.613	151.58	149.848	154.29	205.958	159.307	114.677	257.58	202.675	143.194	167.701	197.956	224.213
ENSMUSG00000008384	Sertad1	30.3853	36.7102	25.9847	25.6002	39.493	33.4075	16.7468	15.3315	23.0692	41.7171	16.03	27.3806	38.5499	26.6097	16.8744	16.3064
ENSMUSG00000008393	Carhsp1	29.6281	31.611	20.1805	36.4238	15.5011	21.5142	38.9941	37.9429	30.103	22.7122	34.9839	28.4286	34.9848	28.0229	23.2201	23.5577
ENSMUSG00000008398	Elk3	69.6528	61.2667	86.4369	59.784	58.0493	60.3828	36.0474	96.1641	61.3575	80.8066	70.6385	82.2008	63.3573	54.3469	60.904	59.2008
ENSMUSG00000008429	Herpud2	88.048	74.3596	72.5784	76.8194	81.2165	72.0012	42.7265	90.4806	72.2012	104.671	74.818	60.0159	60.4432	95.2837	101.371	67.6426
ENSMUSG00000008435	Rdh13	16.7545	12.6521	16.8588	14.946	12.2959	7.80669	25.5213	6.38521	7.26409	12.148	5.81345	6.58315	13.0472	13.801	5.99114	11.1655
ENSMUSG00000008438	Adam21	0	0	0	0	0	0	0	0	0	0	0	0	0	0	0	0
ENSMUSG00000008450	Nutf2	160.73	135.76	148.032	130.297	127.27	146.293	137.314	153.157	137.097	113.831	169.33	158.748	149.052	126.283	128.739	143.925
ENSMUSG00000008461	Fut1	0.0473292	0.0575094	0.0357177	0	0	0	0.0491109	0	0	0.035994	0.0343991	0.0295209	0	0	0	0.0360761
ENSMUSG00000008475	Arpc5	503.677	436.86	384.466	373.819	430.693	440.748	1406.05	396.462	433.71	430.344	374.125	413.912	530.867	407.94	386.145	359.732
ENSMUSG00000008482	Rnf151	0	0	0	0.244708	0	0	0	0	0	0	0	0	0.251477	0	0.0177253	0
ENSMUSG00000008489	Elavl2	0	0	0	0.0376473	0.0562312	0.0183256	0.130962	1.26301	0.020934	0	0	0.0590417	0.0147927	0	0	0
ENSMUSG00000008496	Pou2f2	7.32025	9.54656	28.3956	19.1437	7.53497	4.17823	12.7688	15.963	4.5636	5.52508	18.0939	14.3176	6.25733	8.86989	23.9291	15.4947
ENSMUSG00000008540	Mgst1	31.0795	20.9142	18.4661	21.9296	37.4687	30.4388	116.18	22.892	20.8084	23.0902	17.6811	17.9192	29.4376	31.1348	26.3752	22.0786
ENSMUSG00000008575	Nfib	0.0631056	0.0191698	0.232165	0	0.0187437	0.0549767	0.343776	0.0350836	0.502415	0.035994	0	0	0.147927	0.210472	0	0.0360761
ENSMUSG00000008590	Htr3b	0	0	0	0	0	0	0	0	0	0	0	0	0	0	0	0
ENSMUSG00000008601	Rab25	0.410186	0	0.0714355	0.320002	0.0187437	0	0.622072	0.0350836	0	0.215964	0	0	0.147927	0.0902023	0	0.324685
ENSMUSG00000008604	Ubqln4	119.932	160.374	157.337	181.065	148.432	123.734	36.1129	178.926	148.631	129.147	177.001	166.099	154.895	176.451	173.92	172.931
ENSMUSG00000008658	Rbfox1	0	0	0	0	0	0	0	0	0	0	0	0	0	0.0300674	0	0
ENSMUSG00000008668	Rps18	991.83	763.494	549.982	461.048	847.478	900.262	260.713	497.029	672.211	769.354	496.757	501.692	742.788	645.217	540.567	554.85
ENSMUSG00000008682	Rpl10	503.488	417.882	368.768	352.115	499.539	507.435	197.704	327.347	386.19	430.614	375.741	371.299	353.236	412.856	368.863	413.955
ENSMUSG00000008683	Rps15a	355.395	159.454	121.53	108.631	197.484	202.608	69.0827	100.392	154.43	183.659	106.689	108.504	180.871	163.356	115.533	126.916
ENSMUSG00000008690	Ncaph2	294.955	343.753	262.686	278.515	322.692	354.233	189.061	290.527	339.486	307.227	305.086	334.398	306.461	299.171	302.269	280.095
ENSMUSG00000008730	Hipk1	69.8894	82.4109	90.598	99.3136	97.5798	79.0015	73.3881	66.3781	73.876	113.759	49.5347	65.8315	109.629	99.2827	133.932	93.1664
ENSMUSG00000008734	Gprc5b	0.78882	0.575094	1.75017	2.10825	0.674774	0.879627	1.30962	5.78879	1.44444	0.791868	1.68556	2.43547	0.680466	0.270607	8.68538	2.4171
ENSMUSG00000008763	Man1a2	48.1338	53.0428	71.5962	79.1912	45.7722	50.1204	36.2111	74.5526	61.2109	69.0365	68.3338	70.6139	67.3218	59.3682	66.5406	59.9223
ENSMUSG00000008789	Ceacam5	0	0	0	0	0	0	0	0	0	0	0	0	0	0	0	0.108228
ENSMUSG00000008813	Tppp2	0	0	0	0	0	0.0183256	0.0654812	0	0	0	0	0	0	0	0	0
ENSMUSG00000008822	Acyp1	19.7836	19.3615	15.1979	14.5695	16.4382	20.7262	23.3277	17.9453	16.7262	13.3538	13.45	18.362	23.4021	19.1379	16.4845	15.675
ENSMUSG00000008843	Cldn13	1.59342	0.88181	6.00058	7.09652	1.98683	5.95581	13.4564	7.66576	0.167472	0	3.54311	2.1255	1.03549	0.631416	2.49926	17.2444
ENSMUSG00000008845	Cd163	11.217	20.205	17.216	12.9695	19.6996	16.493	0	14.8404	12.7488	15.9993	17.0448	20.2808	16.7898	10.0275	21.6957	14.701
ENSMUSG00000008855	Hdac5	95.5734	191.295	132.441	121.959	166.725	136.251	57.3452	122.038	115.828	167.408	124.886	94.1863	119.895	120.796	145.631	105.252
ENSMUSG00000008859	Rala	38.0053	26.6652	30.8601	36.085	27.0284	37.2192	45.1493	37.7675	35.5249	32.8445	34.0379	32.901	40.4877	27.3463	28.4668	33.9837
ENSMUSG00000008874	Clec3a	0	0	0	0	0	0	0	0	0	0	0	0	0	0.0300674	0	0
ENSMUSG00000008892	Vdac3	266.668	261.227	193.876	202.43	255.964	274.682	426.086	204.871	278.422	245.713	217.712	282.441	292.793	236.285	192.071	212.56
ENSMUSG00000008932	Slc1a7	0	0.0191698	0	0	0	0	0	0	0	0	0	0	0.0147927	0	0	0
ENSMUSG00000008958	Vps72	137.791	144.77	119.369	114.166	125.433	128.884	77.7426	145.176	120.601	122.812	158.236	152.579	133.09	149.255	147.545	136.458
ENSMUSG00000008976	Gabpa	56.5899	56.0525	68.7745	72.6405	48.5275	53.2541	24.6864	44.9596	76.095	52.0473	62.8471	73.1675	46.3309	54.858	64.4491	47.7106
ENSMUSG00000008999	Bmp7	0	0	1.01796	0.0376473	0.112462	2.05246	0.933107	0.0350836	1.15137	0.971838	1.34156	0	0.887565	0	4.53767	0.108228
ENSMUSG00000009013	Dynll1	190.484	161.601	209.181	177.564	166.725	165.517	101.905	174.488	186.187	157.132	214.238	212.491	187.365	150.893	154.086	175.69
ENSMUSG00000009030	Pdcl	49.0646	62.6085	43.4685	42.8238	61.9292	47.6648	53.5145	48.9065	61.4412	43.8767	40.6425	56.0601	43.2392	53.52	48.904	47.6926
ENSMUSG00000009035	Tmem184b	74.2437	64.8897	73.4178	87.963	65.3031	49.2591	100.53	57.4318	62.446	87.0875	85.9805	76.7395	75.4726	73.2443	65.8139	83.8227
ENSMUSG00000009047	Gm5965	0	0	0	0	0	0	0	0	0	0	0	0	0	0	0	0
ENSMUSG00000009070	Rsph14	0.0157764	0	0	0	0	0	0	0	0	0.017997	0	0	0.0295855	0	0.0177253	0.0360761
ENSMUSG00000009073	Nf2	68.58	93.6253	139.692	187.183	43.7104	77.957	45.5749	162.525	117.46	75.0655	136.582	125.936	89.6736	97.6891	125.389	112.593
ENSMUSG00000009075	Cabp7	0.0946583	0	0.0892944	0	0	0	0	0	0.020934	0	0	0	0	0.0300674	0	0.018038
ENSMUSG00000009076	Zmat5	25.8575	19.9366	22.8951	19.5954	20.4494	17.2627	69.9667	26.9617	22.7762	18.069	27.0205	21.565	25.34	20.6864	24.6204	24.7301
ENSMUSG00000009079	Ewsr1	673.21	1107.86	985.863	927.367	1033.68	1060.35	848.8	1100.62	964.114	1011.99	1068.32	961.509	922.742	1145.76	942.754	942.83
ENSMUSG00000009090	Ap1b1	278.706	349.312	282.92	331.786	379.11	304.938	85.8622	249.164	331.803	323.676	302.643	270.692	285.115	331.373	325.223	386.429
ENSMUSG00000009092	Derl3	1.1359	2.8563	2.37523	0.414121	1.89312	0.916279	0.0163703	1.50859	0.962962	0	2.30474	3.92627	2.2337	0.826855	0.265879	2.47121
ENSMUSG00000009093	Gstt4	0	0	0	0	0.0187437	0	0.261925	0	0	0	0	0	0.0887565	0	0	0.306647
ENSMUSG00000009097	Tbx1	0.0315528	0.345056	0.0178589	0.188237	0	0	0.229184	0	0.020934	0.053991	0	0	0.103549	0.0300674	0	0.252532
ENSMUSG00000009108	Gnat2	3.47081	3.08634	4.83975	4.85651	3.63628	5.90083	14.9952	6.20979	3.64251	5.92101	5.15986	3.04065	5.63604	1.86418	4.46677	1.425
ENSMUSG00000009112	Bcl2l13	78.5191	96.7499	116.476	97.8642	91.7692	106.691	20.5284	125.266	101.969	87.0515	107.772	91.4704	70.517	79.0473	100.378	114.722
ENSMUSG00000009114	2610028H24Rik	0	0	0	0	0	0	0.147333	0	0	0.035994	0	0	0	0.0300674	0	0
ENSMUSG00000009115	Spatc1l	0.0157764	0	0	0	0	0	0	0	0	0.017997	0	0	0	0	0	0
ENSMUSG00000009145	Dqx1	0.0157764	0.345056	0.464331	0	0.0187437	0.0183256	1.30962	0.0701672	0.0418679	0.125979	1.15237	0.0295209	0.0147927	0.0150337	1.34712	0
ENSMUSG00000009185	Ccl8	2.66621	0.306717	0.571484	1.50589	0.112462	0.476465	18.8913	0.771839	0.230274	0.305949	0	0.0147604	2.15974	1.62364	0.815362	0.577217
ENSMUSG00000009207	Lnpk	11.2801	16.0068	20.4663	20.1413	7.94734	9.73088	16.8778	17.3137	10.9694	10.6362	14.6884	16.0003	9.67446	11.0498	10.8656	14.7371
ENSMUSG00000009210	Prr29	0.0631056	0	0.0357177	0.20706	0	0	0	0	0.0628019	0	0.137596	0	0.059171	0.12027	0	0
ENSMUSG00000009214	Mymk	0.678385	0	0	0	0	0	0	0.140334	0	0	0	0	0	0	0	0
ENSMUSG00000009216	Fam163b	0	0	0.0357177	0.0188237	0	0	0.294665	0	0.0837359	0.017997	0.0171995	0	0.118342	0.0601349	0.070901	0.018038
ENSMUSG00000009246	Trpm5	0	0	0.428613	0	0.0187437	0.0366511	0	0	0.0418679	0.197967	0.0859977	0.0147604	0.0295855	0.0150337	0.177253	0
ENSMUSG00000009248	Ascl2	0.725714	1.53358	0.696496	0.941183	0.0187437	0.274884	0.785775	4.1574	0	0.431928	2.51113	2.64212	0.458575	0.781753	2.03841	2.12849
ENSMUSG00000009281	Rarres2	0.0157764	0	0	0	0	0.0183256	0.196444	0	0.020934	0.035994	0	0	0	0	0	0
ENSMUSG00000009291	Pttg1ip	250.419	270.888	210.735	203.051	277.201	244.536	129.833	234.446	248.612	253.578	198.638	272.049	242.142	258.445	214.103	224.032
ENSMUSG00000009292	Trpm2	3.29727	5.34837	6.17917	8.00006	1.42452	4.56307	1.94807	0.0350836	4.39613	10.2223	6.62183	9.31383	8.63896	4.32971	2.97784	7.1611
ENSMUSG00000009293	Ube2g2	89.9254	87.4142	105.6	107.803	88.3579	84.5175	71.5546	118.758	87.0016	104.293	114.463	108.061	88.2683	88.4283	81.5894	101.302
ENSMUSG00000009350	Mpo	4275.75	5843.87	12652.4	10306.5	9946.07	8731.57	6632.28	12786.7	4361.4	4800.2	10169	7388.17	2253.25	6878.15	16794	15027.1
ENSMUSG00000009356	Lpo	0.583726	0.115019	0.178589	0.150589	0.281156	0.128279	0.147333	0.122793	0.0418679	0.017997	0.37839	0.103323	0	0.0300674	0.106352	0.108228
ENSMUSG00000009376	Met	13.9148	2.37705	20.0377	11.5201	6.67276	6.21237	20.7084	9.06911	7.51529	5.18314	18.9023	14.6423	2.42601	9.77192	17.6544	19.2646
ENSMUSG00000009378	Slc16a12	1.10435	4.5049	1.08939	0.790594	7.17884	0.879627	0	0.0350836	1.38164	3.13148	0.0687982	0.236167	3.81653	1.39814	1.9675	1.38893
ENSMUSG00000009394	Syn2	0	0	0	0	0	0	0.638442	0	0.0418679	0	0	0.0147604	0.059171	0.0601349	2.02068	0.324685
ENSMUSG00000009406	Elk1	10.4282	14.9333	11.1082	16.866	14.9387	9.63925	8.11967	5.82387	12.2254	11.3381	9.68335	8.66437	11.4496	9.41111	7.03693	4.94242
ENSMUSG00000009418	Nav1	19.4996	23.0229	36.3428	25.2049	24.1419	4.14158	52.3031	22.892	14.3398	24.5479	19.5559	16.1332	34.9257	8.55419	33.9084	39.4672
ENSMUSG00000009470	Tnpo1	100.385	82.3726	109.011	157.949	84.6091	75.6846	72.3404	123.406	76.8695	79.8887	92.31	64.2964	69.5555	67.0504	98.7652	127.096
ENSMUSG00000009471	Myod1	0	0	0	0.225884	0	0.0183256	0	0	0	0	0	0	0	0	0	0.018038
ENSMUSG00000009487	Otog	0.0315528	0	0	0.0188237	0	0.0183256	0	0.0701672	0.020934	0.017997	0	0	0	0	0.0531758	0.108228
ENSMUSG00000009535	Rnmt	80.5069	80.2064	106.635	98.5607	75.7809	78.012	79.2486	94.7607	108.061	82.2463	115.787	90.4814	87.8837	82.7155	112.165	96.8462
ENSMUSG00000009545	Kcnq1	0.425963	0.153358	0.142871	0.0752947	0.224925	0.0366511	0.425628	0.157876	0.10467	0.035994	0.0859977	0.162365	0.458575	0.24054	0.141802	0.126266
ENSMUSG00000009549	Srp14	147.604	108.635	100.813	99.9348	108.376	110.265	192.155	92.7961	116.874	90.6689	107.119	114.305	137.099	96.5466	100.13	82.1272
ENSMUSG00000009551	6330409D20Rik	0.0157764	0.0766792	0.0892944	0	0.0374874	0.0916279	0	0	0.0418679	0	0.0687982	0	0	0.0902023	0	0.0541141
ENSMUSG00000009555	Cdk9	228.663	249.629	251.614	263.55	306.554	292.183	198.997	260.408	235.8	294.737	252.128	211.62	253.917	308.958	265.117	270.354
ENSMUSG00000009563	Tor2a	64.4308	72.6152	62.7025	59.1063	73.1005	67.3831	52.6305	79.1661	61.5459	76.4513	68.3854	61.7429	60.9017	67.7269	56.4727	62.2132
ENSMUSG00000009566	Fpgs	59.9187	81.1649	64.2384	63.3605	68.7894	78.2319	11.9503	93.8837	110.783	79.8887	82.3514	77.5218	65.8129	82.3848	96.6027	94.1766
ENSMUSG00000009569	Mrtfb	22.86	27.8537	26.074	26.2402	23.5983	24.318	42.6774	34.9959	13.1256	32.5926	23.5118	16.5464	39.0233	21.0021	24.9394	34.5248
ENSMUSG00000009575	Cbx5	84.6403	98.2068	131.298	156.952	99.5104	87.3213	85.5185	145.071	118.989	84.7119	128.068	146.837	109.629	75.2738	148.095	100.273
ENSMUSG00000009580	Odam	0	0	0	0	0	0	0	0	0	0	0	0	0	0	0	0
ENSMUSG00000009585	Apobec3	238.507	233.756	259.15	267.898	223.688	224.653	72.5368	252.391	286.021	291.461	295.385	344.376	240.767	296.976	283.693	264.203
ENSMUSG00000009588	St6galnac1	0	0	0	0	0	0	0.52385	0	0	0	0.0515986	0	0.0887565	0.0300674	0	0.018038
ENSMUSG00000009596	Taf7l	0	0	0	0	0	0	0.0163703	0	0	0	0	0	0	0	0.0177253	0
ENSMUSG00000009614	Sardh	2.50845	2.97132	1.33942	2.88002	3.82372	1.90586	3.27406	7.75347	1.2351	0.035994	1.13517	2.33215	1.86389	5.81805	1.06352	0.414875
ENSMUSG00000009621	Vav2	42.6278	31.8794	45.9866	48.2262	28.9778	63.1866	25.243	30.0842	31.9871	21.1285	26.1777	35.9712	32.8991	27.1659	30.6647	42.6058
ENSMUSG00000009628	Tex15	0.0315528	0	0.48219	0.0752947	0.318643	0	0	0.0175418	2.30274	0.017997	0.877177	0	0.295855	0.0150337	0	0
ENSMUSG00000009630	Ppp2cb	96.2044	97.5551	98.3667	90.4289	103.672	101.304	89.2345	97.8656	100.588	108.054	85.9977	66.5105	103.83	112.978	109.968	118.348
ENSMUSG00000009633	G0s2	0.410186	0.345056	1.66087	0	1.0309	0.95293	0	0.526254	0	0	1.37596	0.413292	0.32544	0.0601349	0.389956	1.06424
ENSMUSG00000009640	Dmap1	55.4225	51.6051	47.2903	43.2944	49.0336	54.5369	9.98588	45.3806	44.8196	45.2265	49.1907	47.4843	48.8604	53.4298	41.8848	66.1996
ENSMUSG00000009646	Pla2g12b	0.0315528	0	0	0	0	0	0	0	0.167472	0	0	0	0	0	0.106352	0
ENSMUSG00000009647	Mcu	28.1135	23.7705	23.3594	23.1343	37.4874	32.0148	10.2806	19.4012	31.5266	25.5737	19.0399	32.532	20.8874	28.6693	23.3796	22.0244
ENSMUSG00000009654	Oit3	1.07279	0	0.964379	0.432944	0.0562312	0.0366511	6.64634	0.140334	0.167472	0.17997	0.0343991	0	0.739637	0.721619	0.106352	0.541141
ENSMUSG00000009670	Tex11	0	0	0	0.960007	0	0	0.982218	0	0	0	0	0	0.177513	0.0601349	0	0.0901902
ENSMUSG00000009681	Bcr	22.9073	25.1508	33.6997	46.8709	38.5933	21.5142	6.43353	38.8375	32.9082	31.2068	19.8827	20.0004	47.248	26.0083	31.1256	40.7479
ENSMUSG00000009687	Fxyd5	335.879	323.279	284.01	296.077	316.6	322.97	292.603	322.19	337.602	331.001	319.396	353.645	363.044	331.539	282.168	263.085
ENSMUSG00000009731	Kcnd1	7.79354	10.1025	1.17869	4.64944	11.3587	5.44269	1.11318	18.4013	11.1997	8.49459	2.87232	7.0112	10.6064	3.45776	4.59084	5.15888
ENSMUSG00000009733	Tfcp2	12.6369	12.4604	15.8051	13.2707	8.75332	14.4772	4.27265	17.5067	20.7665	11.3381	15.8924	21.0484	13.9791	12.3277	17.3353	7.73832
ENSMUSG00000009734	Pou6f2	0.0315528	0.0575094	0.0178589	0	0	0	0	0	0.020934	0	0.0515986	0	0	0	0	0.018038
ENSMUSG00000009739	Pou6f1	0.410186	2.74128	0.0535766	0.056471	0.206181	1.15451	3.4705	0.140334	3.09823	2.93351	1.30717	0.0590417	4.26031	2.24002	0.194978	1.47912
ENSMUSG00000009741	Ubp1	54.397	50.915	72.1141	56.7157	46.5594	37.3109	16.5013	54.5374	54.6376	40.6372	61.626	64.4883	47.751	47.4765	46.8833	55.4309
ENSMUSG00000009772	Nuak2	92.8756	103.919	88.2407	95.2854	101.816	112.574	15.0116	120.459	86.8341	101.755	88.9733	75.4553	62.736	75.7098	87.9173	75.417
ENSMUSG00000009828	Cilk1	32.9411	39.0297	32.9496	48.0192	30.0462	25.1977	4.87835	34.5047	29.0982	37.0018	28.964	33.0338	35.4434	31.1649	39.5982	34.128
ENSMUSG00000009863	Sdhb	399.3	301.982	309.834	256.679	323.067	350.788	639.817	289.475	309.111	280.357	324.057	314.013	322.038	322.579	280.378	299.576
ENSMUSG00000009876	Cox4i2	1.24633	1.22687	1.46443	1.48707	1.29332	1.20949	0.0163703	2.03485	2.19807	1.2058	1.75435	1.83029	1.78992	1.86418	1.9675	1.87596
ENSMUSG00000009894	Snap47	48.4177	55.6691	43.9864	34.9932	48.7899	46.9318	86.0423	35.9958	40.3397	34.2483	47.0924	32.7239	52.8249	55.9856	22.1211	57.4331
ENSMUSG00000009900	Wnt3a	0	0	0	0	0	0.0183256	0	0	0.020934	0.071988	0.0343991	0	0.0147927	0	0	0
ENSMUSG00000009905	Kdsr	70.9149	64.2571	58.6128	60.8757	72.5007	74.4385	9.3147	61.6594	80.2608	65.4371	48.0211	75.1749	71.6265	65.0058	60.0709	61.9967
ENSMUSG00000009907	Vps4b	172.767	174.752	185.339	176.34	174.504	142.371	374.405	178.26	208	181.14	170.121	177.583	195.812	189.996	146.889	153.738
ENSMUSG00000009927	Rps25	447.876	222.408	239.112	228.783	253.565	273.491	237.091	201.029	238.27	252.876	212.5	247.193	337.955	223.657	234.487	228.614
ENSMUSG00000009941	Nxf2	1.19901	0.977659	0.857226	3.76473	4.59221	0.95293	47.7522	0	0.962962	1.49375	2.02955	0	3.63902	4.35978	0	0.901902
ENSMUSG00000009995	Taz	82.7156	94.4496	80.1149	61.704	88.8077	80.3943	30.4488	62.6593	81.3913	84.6039	79.2383	81.5809	99.5848	80.1598	69.2881	63.4939
ENSMUSG00000010021	Kif19a	1.4041	2.24287	1.83946	1.09177	0.731005	1.19116	4.40361	1.08759	2.47021	0.089985	1.04917	1.63841	1.47927	0.962158	0.0354505	0.396837
ENSMUSG00000010025	Aldh3a2	52.5354	53.7329	53.8624	43.8403	43.9915	46.9318	23.0821	40.3286	54.533	53.0552	41.7261	45.5212	48.0764	41.2525	32.3132	36.0761
ENSMUSG00000010044	Zmynd10	0.678385	0.115019	0.214306	0.414121	0.131206	0.0549767	4.97657	0.157876	0.251208	0.197967	0.0171995	0.0295209	0.621295	0.435978	0.159527	1.06424
ENSMUSG00000010045	Tmem115	93.3489	105.549	70.2925	81.0923	127.232	95.7145	25.374	99.3392	98.4106	110.268	72.7369	71.6176	73.875	120.315	69.0753	88.9996
ENSMUSG00000010047	Hyal2	48.1022	70.2381	49.987	52.5745	66.4277	69.7838	71.5873	51.4852	47.6876	63.3675	48.4511	46.8053	62.2479	65.3215	44.7208	53.4467
ENSMUSG00000010048	Ifrd2	105.371	113.926	112.654	134.627	122.134	116.972	52.0412	136.177	126.483	103.933	119.606	99.0572	108.002	109.791	137.548	158.41
ENSMUSG00000010051	Hyal1	1.54609	1.03517	1.19654	0.715299	0.918442	1.5027	4.15806	0.350836	1.67472	1.58374	0.412789	0.501855	1.70117	0.826855	1.29394	0.883864
ENSMUSG00000010054	Tusc2	47.6131	48.9213	43.3078	46.5886	48.6587	45.9239	41.1713	41.3986	50.5555	43.8407	42.2077	40.8716	41.1386	53.8658	34.1389	38.872
ENSMUSG00000010057	Nprl2	31.7894	41.5601	39.0573	29.1014	38.1997	36.5412	23.0985	40.2058	41.2818	38.9275	46.0604	34.3918	37.6475	44.4246	34.1566	37.8438
ENSMUSG00000010064	Slc38a3	0.236646	0.0191698	0.0178589	0.20706	0	0.0366511	0.0163703	0.0350836	0.020934	0.017997	0.0171995	0	0.103549	0	0.0531758	0.0541141
ENSMUSG00000010066	Cacna2d2	0.17354	0.536754	0	0.903536	0.581055	0.824651	0.0327406	0	1.00483	1.11581	0.0687982	1.4908	0.133135	0.0601349	0.070901	0.0541141
ENSMUSG00000010067	Rassf1	18.6635	8.47305	20.6449	21.779	8.04106	11.3069	30.4651	21.6817	15.9307	10.8522	16.9072	19.779	12.2632	10.4635	9.14624	14.3943
ENSMUSG00000010080	Epn3	0.946583	1.38022	0.857226	0.432944	0.599799	0.109953	2.29184	0	0.314009	0.71988	0.257993	0	0.813601	0.586315	0.0354505	0.162342
ENSMUSG00000010086	Rnf112	0	0	0	0	0	0	0	0.0175418	0.020934	0	0.154796	0	0.0295855	0	0.0177253	0
ENSMUSG00000010095	Slc3a2	221.501	237.974	249.756	250.336	241.363	260.571	430.866	242.287	264.249	263.116	254.519	276.227	271.476	268.517	268.112	285.542
ENSMUSG00000010097	Nxf1	114.253	141.78	175.624	150.514	116.136	113.783	100.596	177.084	167.66	131.594	187.888	220.373	152.75	142.024	153.412	130.758
ENSMUSG00000010110	Stx5a	85.1294	90.1172	98.0273	86.2124	106.258	83.8395	63.9915	87.8844	74.4202	111.905	98.089	90.7324	103.534	90.7586	86.3752	82.6142
ENSMUSG00000010122	Slc47a1	0	0.0383396	0	0.169413	0	0	0.0163703	0	0	0	0.206395	0.250927	0	0	0	0
ENSMUSG00000010136	Pifo	0.110435	0	0	0.0752947	0.0374874	0	0.0654812	0	0	0.035994	0	0	0.236684	0.12027	0	0.144304
ENSMUSG00000010142	Tnfrsf13b	101.158	109.134	82.9545	85.4406	104.159	95.183	58.6057	103.918	89.6183	131.612	106.758	113.641	95.6055	92.4724	94.3338	69.9876
ENSMUSG00000010154	Spire2	0.157764	2.97132	1.67873	3.25649	1.53698	0.0549767	0.278295	2.9821	1.86312	0.053991	2.01235	1.71221	6.09461	3.53292	1.22304	1.74969
ENSMUSG00000010175	Prox1	0.157764	0	0	0.112942	0	0.0366511	1.96444	0.0175418	0	0	0	0	0.147927	0.0300674	0.0354505	0.108228
ENSMUSG00000010205	Raver1	0	0	0.0357177	0	0.0749749	0.0366511	0	0	0	0	0	0	0	0	0.0354505	0.0360761
ENSMUSG00000010277	2610507B11Rik	228.316	273.476	312.173	372.464	235.215	204.752	217.447	257.742	241.201	210.403	299.995	226.764	213.962	294.856	295.994	285.885
ENSMUSG00000010290	AI597479	36.7274	41.1384	33.0211	42.0144	34.9195	29.9257	11.5247	52.7482	54.6795	40.6552	51.6674	26.3621	33.2245	32.7134	32.7563	26.6422
ENSMUSG00000010307	Tmem86a	25.9364	25.0166	17.5731	23.6425	30.4023	23.2735	63.4677	24.1901	22.2319	23.756	7.7398	14.111	40.9019	34.2017	10.8301	12.5905
ENSMUSG00000010311	Optc	0	0	0	0	0	0	0	0	0.20934	0	0	0	0	0	0	0
ENSMUSG00000010342	Tex14	0.157764	0.134189	0.553625	0.169413	0.224925	0.256558	0.785775	0.175418	0.230274	0.107982	0.257993	0.0738022	0.0739637	0.255573	0.283604	0.216456
ENSMUSG00000010358	Ifi35	53.198	44.6848	40.0217	35.5955	40.2803	44.2929	100.808	37.9253	48.2737	41.6271	42.0701	41.5949	56.671	49.2956	47.2378	48.4682
ENSMUSG00000010362	Rdm1	57.9467	47.9628	35.4677	35.3508	42.3046	54.2987	56.232	30.5227	48.8808	48.07	36.1534	32.8272	33.5352	39.223	26.4638	32.2881
ENSMUSG00000010376	Nedd8	100.338	103.21	136.763	122.862	97.5798	101.909	243.672	150.544	93.7632	96.5539	160.145	150.232	129.658	112.046	124.697	145.621
ENSMUSG00000010392	Gosr1	45.01	66.0783	72.5249	67.3699	72.5007	66.5035	42.1044	59.1334	65.3977	63.7274	57.0337	57.1081	49.2598	64.7202	54.0621	45.8707
ENSMUSG00000010406	Mrpl52	59.6348	28.8889	27.9134	23.5296	33.0639	34.5804	19.317	26.3653	32.029	31.3148	25.8165	33.3143	38.7274	24.8056	24.0177	31.6567
ENSMUSG00000010435	Spaca7	0	0	0	0	0	0	0	0	0	0	0	0	0	0	0	0
ENSMUSG00000010453	Kansl3	66.2766	83.9445	83.4009	94.5701	59.53	69.3806	27.8623	59.0106	78.7117	87.8434	93.7203	70.8205	100.25	62.856	60.3545	57.884
ENSMUSG00000010461	Eya4	1.78273	0.90098	0.0714355	0.790594	0.187437	0.916279	11.361	0.68413	0.272142	0.323946	0	0	1.19821	1.23277	0.354505	0.793673
ENSMUSG00000010476	Ebf3	0	0.0383396	0	0.112942	0	0.0366511	0	0	0.0837359	0.053991	0	0.0147604	0.177513	0.0902023	0.0531758	0
ENSMUSG00000010492	Uckl1os	0.646832	0.0575094	0.375036	0.188237	0	0	0	0	0.90016	0.17997	0.0171995	0.0147604	0.59171	0.0150337	0.0177253	0
ENSMUSG00000010505	Myt1	0	0.115019	0.0178589	0.0376473	0.0374874	0	0.52385	0.122793	0.020934	0	0	0.0147604	0.0887565	0.0300674	0.0177253	0.018038
ENSMUSG00000010517	Faf1	124.712	121.115	147.925	134.307	104.309	132.604	48.7999	140.668	138.227	103.519	151.115	136.401	139.377	137.904	129.572	127.421
ENSMUSG00000010529	Gm266	0	0	0	0	0	0.201581	0	0	0	0	0	0	0.118342	0	0	0.018038
ENSMUSG00000010538	Tsacc	2.8713	1.80196	1.57158	1.44942	2.28673	2.38232	0.818515	1.26301	1.77939	2.55557	1.70276	2.43547	1.47927	1.3831	1.25849	1.17247
ENSMUSG00000010554	Mettl16	69.6843	55.9566	67.4351	71.0782	45.5472	37.4758	107.848	49.5029	74.19	64.5913	77.2088	79.2488	52.6178	50.6336	53.5126	71.1961
ENSMUSG00000010592	Dazl	0.473292	0	0	0.414121	0	0	0	0	0.020934	0	0.75678	0.501855	0	0	0.070901	0
ENSMUSG00000010601	Apol7a	0.0631056	0.115019	0.0357177	0.0376473	0.0374874	0.0733023	0	0	0.0628019	0.071988	0.0687982	0	0.059171	0.0601349	0.0177253	0.0360761
ENSMUSG00000010607	Pigyl	34.7081	32.2819	26.324	22.946	36.0629	31.7399	29.9577	27.6985	37.5765	30.091	24.4234	29.4471	43.3132	27.4516	23.5923	30.6466
ENSMUSG00000010608	Rbm25	57.0632	71.1966	128.245	139.05	69.8016	47.903	113.512	123.775	69.0402	60.11	116.527	137.405	73.6679	67.5766	123.51	121.143
ENSMUSG00000010609	Psen2	54.113	58.7937	45.2722	44.9697	52.7823	78.5434	46.9991	46.0121	51.7488	63.4394	42.3969	39.9122	48.89	65.4568	67.2851	50.8312
ENSMUSG00000010651	Acaa1b	3.04484	1.05434	1.08939	1.37413	1.70568	1.83256	2.73384	1.43843	1.08857	1.34978	1.22117	1.03323	1.71596	1.44324	1.25849	1.04621
ENSMUSG00000010660	Plcd1	0.993913	0	0.107153	0.188237	0.0749749	0.219907	3.55236	0.245585	0.251208	0.377937	0	0.0295209	0.562124	0.420944	0.141802	0.649369
ENSMUSG00000010663	Fads1	161.945	140.17	80.5614	121.808	149.294	112.262	84.4871	96.8658	152.839	156.484	103.197	104.341	150.339	181.818	107.061	107.579
ENSMUSG00000010721	Lmbr1	8.10906	5.40588	3.7325	4.64944	4.51724	6.56055	19.628	5.75371	5.56843	1.85369	6.00264	8.33964	4.03842	7.21619	2.51699	6.2592
ENSMUSG00000010751	Tnfrsf22	9.52894	10.4859	10.4296	11.8777	10.0654	12.9928	18.4166	13.2967	12.0789	22.2263	18.4035	12.1921	17.1152	10.268	14.5524	6.29527
ENSMUSG00000010755	Cars	53.9079	56.6851	88.3478	71.304	66.0154	57.1575	64.8264	89.2	50.5555	50.9855	91.5704	87.6179	62.1887	47.4765	85.2585	73.2344
ENSMUSG00000010760	Phlda2	6.83118	4.40905	2.42881	2.99296	4.44226	3.92167	4.15806	2.31552	5.35909	4.71522	2.78633	4.16244	8.72772	1.63868	2.33973	4.02248
ENSMUSG00000010796	Asz1	0	0	0	0	0	0	0	0	0	0	0	0	0	0	0	0
ENSMUSG00000010797	Wnt2	0	0	0	0	0	0	0	0	0	0	0	0.236167	0	0	0	0
ENSMUSG00000010803	Gabra1	0	0	0	0	0	0	0	0	0.0418679	0	0	0	0	0	0	0
ENSMUSG00000010825	Grid2ip	0.0631056	0	0.0178589	0.056471	0.0749749	0.0183256	0	0	0	0.017997	0.0515986	0.0147604	0.488161	0	0.106352	0.018038
ENSMUSG00000010830	Kdelr3	0.189317	0	0.0357177	0.301179	0.0187437	0	1.30962	0.105251	0	0.845859	0	0	0	0.0902023	0.0354505	0.108228
ENSMUSG00000010841	Cfap97d1	0.0315528	0.191698	0.0892944	0.0376473	0.262412	0.0366511	0	0	0.188406	0.665889	0.120397	0	0	0.0751686	0	0
ENSMUSG00000010911	Apip	43.6217	36.921	36.1821	31.4543	30.2336	39.0884	81.7697	46.5559	36.5088	27.7874	41.8121	43.927	37.0854	38.6517	31.4446	39.864
ENSMUSG00000010914	Pdhx	40.3402	47.081	53.3802	43.8027	39.0619	51.8797	84.0779	57.309	48.0853	49.4738	61.368	54.3774	50.2362	42.6356	57.0931	47.8549
ENSMUSG00000010936	Vac14	114.19	124.144	143.05	127.888	135.461	114.37	127.836	144.001	121.417	109.692	145.715	136.918	103.342	136.311	145.968	170.315
ENSMUSG00000011008	Mcoln2	46.5561	33.7772	14.805	20.0096	37.0938	41.6907	44.3963	36.1361	29.3076	40.0253	17.6467	27.7053	49.8663	36.111	4.87445	16.1801
ENSMUSG00000011034	Slc5a1	0.0157764	0.0191698	0	0.0752947	0	0.0366511	0.0491109	0.0526254	0.125604	0	0.0171995	0.0147604	0	0	0.0354505	0.018038
ENSMUSG00000011096	Akt1s1	96.3464	85.8232	78.8291	80.3206	104.009	92.8557	20.7739	89.1649	92.57	84.28	77.484	104.091	84.5257	82.1743	97.4712	71.0157
ENSMUSG00000011114	Tbrg1	128.025	129.511	89.2408	96.603	120.803	135.096	184.722	100.304	133.454	136.543	102.561	136.667	160.605	116.135	88.4136	110.194
ENSMUSG00000011118	Panx3	0	0.0191698	0	0	0	0	0.0163703	0	0.0837359	0	0	0	0.0147927	0	0	0
ENSMUSG00000011148	Adssl1	217.304	248.421	227.736	211.013	299.168	264.841	90.626	227.815	230.295	207.649	241.654	197.155	181.004	207.27	238.228	219.775
ENSMUSG00000011154	Cfap161	0.126211	0.0191698	0	0	0.168693	0.0733023	0	0	0.020934	0.269955	0	0	0.0295855	0	0	0.018038
ENSMUSG00000011158	Brf1	66.2608	74.1296	89.723	74.7299	87.1583	74.75	40.4674	69.062	92.2141	97.9217	97.1086	101.006	88.2387	76.1157	70.4579	121.035
ENSMUSG00000011171	Vipr2	15.382	16.3135	13.8406	7.51064	16.6069	16.4014	0	5.92912	16.3704	9.70039	12.0569	21.0189	18.417	13.9212	13.5244	7.32344
ENSMUSG00000011179	Odc1	259.601	206.152	232.933	220.086	246.367	246.827	107.733	242.936	217.567	177.414	256.187	210.174	195.634	198.205	226.742	231.41
ENSMUSG00000011254	Thg1l	8.58236	6.36437	7.03639	6.43769	7.62869	7.51348	8.67626	4.7012	6.30112	8.11665	7.36141	5.60896	5.88751	5.59254	3.68685	4.27501
ENSMUSG00000011256	Adam19	0.39441	0.536754	0.142871	0.0376473	0.0562312	1.35609	3.12673	0.0701672	0.188406	0.125979	0.223594	0.0295209	0.192306	0.180405	0.0531758	0.396837
ENSMUSG00000011257	Pabpc4	19.0737	19.304	25.8418	38.3062	16.3258	14.2573	20.8721	31.8383	14.6956	16.9532	18.3347	18.5686	19.5264	20.1452	29.6721	40.3511
ENSMUSG00000011263	Exoc3l2	34.4241	46.5251	25.431	29.6849	48.2463	36.2846	0.147333	27.8739	17.4799	49.8697	27.3817	22.8049	21.0057	26.8352	23.3264	21.321
ENSMUSG00000011267	Zfp296	8.99254	15.0291	12.4476	11.7648	19.9808	14.6055	3.73243	13.7177	13.4815	15.8014	14.9808	15.6903	14.3046	11.5158	16.5731	9.21743
ENSMUSG00000011305	Plin5	0	0	0	0	0	0.0366511	0	0	0.020934	0.017997	0	0.0147604	0	0.0451012	0	0.018038
ENSMUSG00000011306	Sugp1	65.2512	77.561	73.8643	73.1488	61.948	77.7554	32.3968	64.624	66.0885	90.6329	95.5435	82.009	76.5377	78.4159	80.4904	92.4088
ENSMUSG00000011349	Dmrtc2	0	0	0.392895	0	0.0187437	0.0366511	0.0163703	0	0.0628019	0.017997	0.103197	0	0	0	0	0
ENSMUSG00000011350	Gm5893	0.0157764	0.0383396	0	0	0.0187437	0	0	0	0	0	0.0687982	0.0147604	0	0.0150337	0.0354505	0
ENSMUSG00000011382	Dhdh	4.74869	2.76045	5.50053	6.38122	2.64286	1.79591	4.40361	6.52555	3.76811	2.23163	7.757	4.6643	2.4556	3.29238	6.85968	5.62787
ENSMUSG00000011427	Zfp790	18.8055	22.1986	34.2355	31.059	26.5973	19.6267	35.3762	28.0318	28.7423	26.4376	24.6298	41.4325	20.5027	22.9565	30.1329	21.8801
ENSMUSG00000011463	Cpb1	0.126211	0	0.428613	0	0	0.0183256	0	0	0.0628019	0	0.137596	0	0	0	0.638109	0
ENSMUSG00000011486	Slc25a41	0.662608	0	0.375036	0.451768	1.1996	0	0	0	0.020934	0.827862	0.137596	0	0.946736	0.210472	0.549483	0.432913
ENSMUSG00000011589	Fsd1	0.0157764	0.0383396	0	0	0.0187437	0.458139	0	0	0	0.017997	0	0	0	0	0.0177253	0.018038
ENSMUSG00000011632	Pinlyp	0	0	0	0	0	0	0.0327406	0	0.020934	0	0	0	0	0	0	0
ENSMUSG00000011658	Fuz	12.6684	22.4287	13.5727	10.0518	15.8947	19.4434	3.66695	17.419	17.7101	21.6504	12.8825	15.1737	11.2721	18.0254	17.7962	16.6852
ENSMUSG00000011751	Sptbn4	0.993913	5.9043	0.357177	0.809418	3.28015	1.94251	0.392887	1.26301	2.49114	2.50158	2.99272	7.86731	3.52067	1.2929	0.921714	1.71361
ENSMUSG00000011752	Pgam1	164.974	194.324	271.776	258.016	201.682	218.807	224.797	272.634	199.354	191.614	289.537	293.364	193.267	225.596	280.963	253.849
ENSMUSG00000011831	Evi5	7.65155	9.31652	13.2691	12.8566	6.16668	5.03953	10.7553	7.49034	3.97745	9.6104	14.998	6.43555	15.0146	10.3582	8.2777	8.26142
ENSMUSG00000011832	Evi5l	15.1927	34.6782	23.2165	29.4214	31.3957	25.6191	1.60429	27.4704	30.5636	20.1386	20.8459	23.0706	25.695	36.1411	35.3619	29.2757
ENSMUSG00000011837	Snapc2	64.0995	63.0878	51.7729	44.9321	65.5468	63.6447	30.8744	56.239	54.9307	59.858	49.8099	64.5769	55.532	57.1732	61.0104	57.3068
ENSMUSG00000011877	Git1	137.27	169.135	161.158	170.354	139.172	126.483	49.5038	157.806	186.187	194.89	138.422	155.235	157.276	162.59	179.681	132.904
ENSMUSG00000011884	Gltp	346.86	358.073	277.705	296.567	358.811	352.877	480.976	277.458	355.668	380.169	293.631	311.991	336.742	360.659	236.88	241.926
ENSMUSG00000011958	Bnip2	112.075	105.146	127.048	126.514	102.472	88.4575	148.675	111.373	121.166	93.3325	120.706	135.176	111.389	99.3579	101.14	114.145
ENSMUSG00000011960	Ccnt1	65.2196	65.7524	69.6317	57.8075	57.0934	53.3641	33.6573	54.3971	66.5281	73.1758	65.5819	62.5842	53.8604	51.4304	60.2127	53.5369
ENSMUSG00000012017	Scarf2	0.836149	0.095849	0.0357177	0.828241	0.112462	2.01581	0.654812	0.0701672	0.0418679	1.00783	1.53076	0.988949	0.192306	2.13479	0.177253	0.432913
ENSMUSG00000012042	4930579F01Rik	0.0157764	0	0	0	0	0	0	0	0	0.035994	0	0	0.0147927	0	0	0
ENSMUSG00000012076	Brms1l	19.9571	16.6394	20.3413	17.8637	16.8131	12.5897	6.66271	8.45514	12.7069	22.9642	17.9391	13.5206	14.1715	20.1151	22.9542	13.9073
ENSMUSG00000012114	Med15	90.3041	145.652	155.586	139.86	190.211	134.345	96.0773	184.452	152.985	146.64	162.364	169.125	116.301	161.432	154.777	153.035
ENSMUSG00000012117	Dhdds	69.0217	84.0404	91.9553	92.1983	77.449	88.7141	64.5808	93.182	87.3574	73.5358	85.9633	111.825	72.3809	74.0862	88.52	73.4509
ENSMUSG00000012123	Crybg2	0.552174	1.43773	1.83946	1.20471	0.899698	1.00791	0.55659	0.0350836	0.0628019	1.29578	2.09834	1.9041	0.266269	1.65371	0.106352	0.18038
ENSMUSG00000012126	Ubxn11	7.77776	16.5819	13.6978	10.2965	10.3278	11.2519	0.785775	16.1911	10.0274	10.8342	10.2681	14.6571	8.565	15.5298	16.5554	11.1836
ENSMUSG00000012187	Mogat1	0	0	0	0	0	0	0	0	0	0	0	0	0	0.0150337	0	0
ENSMUSG00000012211	Tex22	0	0	0	0.0376473	0	0.16493	0	0.245585	0	0	0	0	0.0443782	0	0	0
ENSMUSG00000012282	Wnt8a	0	0	0	0	0	0	0	0	0	0	0	0	0	0	0	0
ENSMUSG00000012296	Tjap1	26.0153	38.6846	41.5219	40.0379	35.7818	42.1488	9.03641	46.1875	46.3478	43.1028	47.1784	36.2959	35.4138	43.9887	44.7031	43.2011
ENSMUSG00000012350	Ehf	0.473292	0.0766792	0.375036	0.320002	0	0.0366511	2.94665	0.140334	0	0.035994	0.0171995	0	0.739637	0.24054	0.070901	0.162342
ENSMUSG00000012396	Nanog	0	0.0191698	0	0	0	0.0366511	0.163703	0	0	0	0	0	0.0147927	0	0	0
ENSMUSG00000012405	Rpl15	402.361	358.283	286.421	282.28	396.58	462.922	233.686	255.637	348.299	378.423	276.294	315.608	343.059	324.052	293.708	268.316
ENSMUSG00000012422	Tmem167	85.8867	66.9984	65.9885	62.664	64.4971	69.3623	138.28	66.6763	70.6731	71.6461	65.5647	77.5956	87.647	67.4262	65.4948	75.9401
ENSMUSG00000012428	Steap4	0	0	0	0.0376473	0	0.16493	0	0	0	0	0	0	0.177513	0.0601349	0	0.0360761
ENSMUSG00000012429	Mplkip	57.0001	55.3432	37.6286	37.1956	45.8471	59.3015	63.5986	43.5036	54.3864	56.6726	43.6869	47.3367	65.7242	55.5346	47.7696	41.7761
ENSMUSG00000012443	Kif11	77.7303	142.757	204.216	209.244	106.127	94.395	99.646	162.805	115.325	99.0555	201.458	225.746	93.2091	108.829	205.648	221.796
ENSMUSG00000012483	Rpa3	49.5694	29.7707	30.9137	26.9178	29.7838	31.3001	88.2196	31.6629	35.2319	25.4478	27.4849	30.9083	36.8044	25.6325	24.8685	26.8586
ENSMUSG00000012519	Mlkl	32.6729	56.4934	70.6318	62.9087	43.6166	43.9447	36.604	55.7829	50.3253	40.2053	71.4641	49.108	65.2804	58.6165	55.675	45.3837
ENSMUSG00000012520	Phox2b	0	0	0	0.0752947	0	0.0366511	0	0	0	0.017997	0	0	0.0887565	0	0	0
ENSMUSG00000012535	Tnpo3	136.86	132.099	178.946	205.498	139.884	101.634	115.787	187.311	129.602	112.625	211.933	172.254	142.38	128.418	143.238	184.673
ENSMUSG00000012609	Ttll5	22.0869	25.7834	41.9862	48.3768	26.9347	18.5455	4.38724	31.0139	24.3043	24.8899	43.8588	32.1925	30.5914	19.0928	44.3841	42.1729
ENSMUSG00000012640	Zfp715	31.9945	45.4899	35.682	58.2404	44.835	39.6382	39.1741	23.927	47.1014	39.6294	35.1903	39.9565	36.8783	37.9451	35.2201	48.9733
ENSMUSG00000012705	Retn	0	0	0	0	0.112462	0.0366511	0	0	0	0	0	0.0147604	0	0	0	0
ENSMUSG00000012777	Acp4	0	0	0.0178589	0	0	0.366511	0	0	0	0	0	0	0	0	0.0177253	0
ENSMUSG00000012819	Cdh23	0.520621	0.0383396	1.14297	0.20706	0.224925	0.0549767	0.343776	0.245585	0.795491	0.071988	0.825578	1.01847	0.281062	0.0751686	0.301329	0.324685
ENSMUSG00000012848	Rps5	892.959	611.593	467.688	435.429	707.969	783.968	288.297	455.174	576.563	666.213	481.278	449.189	584.698	566.952	520.077	526.079
ENSMUSG00000012889	Podnl1	0.725714	2.56875	0.857226	1.73178	1.18085	3.84837	0	0	2.49114	2.46559	4.21389	3.63107	0.91715	3.35252	0	0
ENSMUSG00000013033	Adgrl1	4.79602	6.49856	6.00058	9.84478	4.53598	5.62595	0.52385	10.6829	7.68277	4.51725	3.9559	9.29907	4.30469	6.35926	8.15362	11.7608
ENSMUSG00000013076	Amotl1	0.662608	0	0.0714355	0.056471	0	0.146605	1.58792	0.0877089	0.0837359	0.107982	0	0.0442813	0.42899	0.150337	0.0177253	0
ENSMUSG00000013083	2200002J24Rik	0.0946583	0	0	0	0	0	0.0327406	0	0	0	0	0	0.118342	0	0	0
ENSMUSG00000013089	Etv5	57.2367	69.7205	47.0403	61.271	51.5827	59.778	52.3686	43.2405	68.0982	60.7039	65.2895	67.1747	82.3512	47.7922	37.1167	66.1635
ENSMUSG00000013091	Tmem190	0.362857	1.76362	0.357177	0.470592	0.487337	0.293209	0	0.105251	0.648953	0.017997	2.56273	0.472334	0.946736	0.285641	1.38257	0.811711
ENSMUSG00000013150	Gfod2	16.9123	27.1636	18.1803	23.2849	29.3527	25.8574	1.01496	9.06911	22.2947	21.0565	21.6886	22.2882	24.5264	26.5044	20.3486	18.6694
ENSMUSG00000013155	Enkd1	13.615	13.2463	17.5731	17.1295	15.9696	14.074	7.825	17.2436	10.3414	12.6519	20.9834	8.67913	12.9437	15.6351	16.8744	12.9513
ENSMUSG00000013158	4933405L10Rik	0	0	0	0	0	0	0	0	0	0	0	0	0	0	0	0
ENSMUSG00000013160	Atp6v0d1	132.395	110.667	87.0799	99.6713	109.651	125.439	153.341	86.9371	102.325	108.018	67.0438	67.278	121.079	128.313	87.6337	102.727
ENSMUSG00000013236	Ptprs	246.254	333.056	243.649	322.901	313.395	311.333	60.6683	287.808	295.169	345.183	249.015	225.982	301.535	230.347	321.519	266.602
ENSMUSG00000013275	Slc41a1	55.7695	75.7398	41.6469	44.0097	43.223	50.0838	7.18656	42.8195	63.5136	72.33	51.0655	54.776	61.9816	54.3619	35.8228	50.1097
ENSMUSG00000013338	Fer1l4	0.0157764	0.0191698	0.0357177	0.0376473	0.0187437	0	0	0	0.0418679	0.053991	0	0.0147604	0.0887565	0	0.0177253	0.018038
ENSMUSG00000013353	4931406B18Rik	0.0157764	0.0191698	0.0178589	0.0376473	0.0749749	0.0733023	0.720293	0.0350836	0.314009	0	0.0515986	0.0442813	0.0147927	0	0.301329	0
ENSMUSG00000013367	Iglon5	0.110435	0.0191698	0.0357177	0.056471	0.281156	0.0916279	0.0163703	0	0.334943	0.035994	0.0343991	0.0295209	0	0.135303	0.0177253	0.018038
ENSMUSG00000013415	Igf2bp1	0	0.134189	0.125012	0	0.0187437	0.0183256	0	0.0877089	1.94686	0.089985	0.0171995	0.0147604	0	0.0300674	0.0531758	0.018038
ENSMUSG00000013418	B4galnt2	0.252422	0.421735	0.32146	0	0	0	0	0.999882	0.439613	0.323946	0.343991	0.0147604	0.0295855	0.541214	0	0.523103
ENSMUSG00000013419	Zfp651	3.70745	0	1.62516	0.112942	0.0187437	0.0366511	0.0654812	3.89428	0.0418679	4.7872	0.223594	3.79343	0	5.0814	3.61595	3.75191
ENSMUSG00000013465	Nelfb	221.485	256.894	208.717	198.364	249.16	265.464	54.2839	271.424	256.588	249.618	260.883	213.746	211.255	263.316	268.236	215.104
ENSMUSG00000013483	Card14	0.0315528	0	0	0.112942	0	0	1.0477	0	0.020934	1.00783	0	0	0	0.0902023	0.0354505	0.0541141
ENSMUSG00000013495	Tmem175	81.3115	94.3154	83.7938	66.1464	95.8929	95.238	47.7685	78.6749	92.9677	94.2683	85.6193	84.0459	90.4428	99.0121	82.7238	58.9302
ENSMUSG00000013523	Bcas1	0.220869	2.14702	0.62506	1.37413	0.918442	1.5027	1.03133	0.719213	1.57005	0.827862	0.533186	0.767542	0.902357	1.81908	1.24077	0.541141
ENSMUSG00000013539	Tango2	31.111	36.4609	38.0394	35.1061	46.1095	35.6066	88.989	44.8719	43.5008	40.1693	37.0134	48.7537	39.8221	32.6232	37.3826	53.591
ENSMUSG00000013562	4833413E03Rik	0	0.0191698	0	0	0	0	0	0.0175418	0.020934	0	0	0	0	0.0300674	0	0
ENSMUSG00000013584	Aldh1a2	0	0	0.0178589	0.244708	0	0	0	0	0.020934	0	0	0	0	0.0601349	0	0
ENSMUSG00000013593	Ndufs2	299.972	276.313	236.809	236.915	264.286	304.992	157.777	271.582	286.398	241.718	267.143	255.783	245.249	251.71	230.499	262.85
ENSMUSG00000013611	Snx31	6.29478	3.81479	1.89304	1.99531	2.28673	2.95042	0	1.75418	6.19645	11.4281	1.94355	0	1.47927	0.541214	0.549483	1.19051
ENSMUSG00000013622	Atraid	105.796	85.7273	58.2914	57.8639	87.4582	106.508	51.1736	65.3783	85.5362	88.2393	59.2352	74.7468	91.8482	86.5642	58.7238	73.1983
ENSMUSG00000013629	Cad	410.517	375.325	347.409	519.439	406.139	410.328	6.02427	370.939	544.744	483.706	358.851	340.715	297.393	472.63	506.943	491.049
ENSMUSG00000013643	Lypd8	0	0	0	0	0	0	0	0	0	0	0	0	0	0	0	0
ENSMUSG00000013646	Sh3bp5l	70.4258	75.0497	54.0945	52.4239	63.2413	54.0971	24.8501	67.1851	79.2769	71.4841	62.3828	93.6845	54.1562	78.1152	81.7666	35.0118
ENSMUSG00000013653	1810065E05Rik	0	0	0.0178589	0	0	0	0	0	0	0	0	0.0147604	0	0	0	0.018038
ENSMUSG00000013662	Atad1	77.0519	80.1489	87.2942	91.6524	67.5336	74.5484	62.289	73.5878	79.6747	81.4005	75.6608	98.7473	85.147	61.2624	86.9956	60.4454
ENSMUSG00000013663	Pten	135.961	123.779	112.922	138.297	135.105	122.177	209.982	117.565	143.816	134.924	90.8136	118.246	136.064	121.908	116.951	118.348
ENSMUSG00000013668	4933402N03Rik	0	0	0	0.0376473	0	0	0	0	0	0	0	0	0	0	0.0177253	0
ENSMUSG00000013698	Pea15a	67.1443	25.3425	23.8237	40.7909	26.185	29.101	324.05	38.5569	32.3639	27.9493	29.7896	26.2145	62.7804	54.3319	25.6307	41.6318
ENSMUSG00000013701	Timm23	137.191	136.278	121.637	143.417	146.107	173.891	245.211	137.3	137.285	130.856	158.15	149.198	147.587	143.452	138.186	143.042
ENSMUSG00000013707	Tnfaip8l2	83.9146	84.6538	62.3096	50.7674	74.5813	79.8995	58.5238	67.3956	60.2898	112.499	55.2277	54.3922	82.6175	85.0909	59.4505	65.8929
ENSMUSG00000013736	Trnt1	36.5697	51.1833	72.632	60.1604	37.1313	40.7927	232.999	54.362	52.7536	54.5849	66.8718	67.9275	59.9698	61.4127	70.1743	48.4862
ENSMUSG00000013766	Ly6g6e	0.0315528	0.0383396	0.0178589	0.20706	0	0.0183256	0	0	0	0.035994	0.0171995	0	0.0887565	0	0.319055	0.198418
ENSMUSG00000013787	Ehmt2	114.174	143.793	114.19	147.389	128.076	151.956	45.5094	156.946	124.599	179.79	108.89	122.393	102.085	161.207	149.016	154.225
ENSMUSG00000013822	Elof1	106.964	96.1557	78.4183	87.5865	92.444	101.084	130.913	89.7438	108.166	91.5508	92.1896	94.4372	96.5818	100.726	82.5111	87.25
ENSMUSG00000013833	Med16	238.823	286.224	200.984	175.512	294.501	296.013	26.5854	221.623	242.373	258.491	226.656	210.351	183.356	253.408	261.483	221.976
ENSMUSG00000013846	St3gal1	21.2981	22.7162	20.252	19.6896	23.5421	29.156	19.8081	27.8213	22.0853	29.4971	16.804	25.9931	19.7039	17.3489	17.0872	24.9827
ENSMUSG00000013858	Tmem259	20.2884	22.9271	28.4313	39.3226	17.3942	29.3209	13.6201	40.697	29.4122	25.3218	26.1433	25.0042	34.1712	43.4174	29.6366	30.827
ENSMUSG00000013878	Rnf170	9.86024	6.74777	13.7513	12.4048	8.02231	6.61553	2.34095	4.87662	5.50563	8.90852	9.63175	8.26584	16.3904	3.00674	10.8301	12.0855
ENSMUSG00000013921	Clip3	1.41988	0.785961	0.0178589	0.056471	0.0187437	0.32986	0.327406	0.105251	0.962962	2.78954	0.103197	0.0295209	0	0.0601349	0.070901	0.0901902
ENSMUSG00000013928	Thap8	0.126211	0.268377	0	0	0.0187437	0.0183256	0	0.0175418	0	0.935844	0	0	0	0.0601349	0.124077	0.0721521
ENSMUSG00000013936	Myl2	0.315528	0.0766792	0	0.790594	0.374874	0.109953	0	0.263127	0	0.161973	0	0	0	0	0.177253	0.018038
ENSMUSG00000013973	Dedd	5.96348	4.94581	5.60769	4.5365	5.28573	3.64679	6.13886	5.52566	6.23832	4.84119	5.79625	5.53516	3.65381	6.56974	4.30724	3.80602
ENSMUSG00000013974	Mcemp1	0.189317	0.460075	1.55372	1.60001	0	0.146605	1.14592	1.50859	0	0	2.13274	1.07751	0.517746	0.0902023	0.833087	0.91994
ENSMUSG00000013997	Nit1	26.1099	26.646	18.8232	16.3013	17.3567	21.1477	6.22072	24.1726	20.934	27.3015	23.701	30.1998	24.9849	20.3406	15.2792	21.7358
ENSMUSG00000014030	Pax5	0	0	0	0.0941183	0	0.0183256	0.0654812	0	0.418679	0	0	0	0.0443782	0	0	0.468989
ENSMUSG00000014039	Prdm15	13.615	29.7707	22.2164	36.1603	12.8957	12.8096	3.99435	34.1889	31.7778	10.6902	28.5856	38.0229	15.5768	32.5931	32.5081	13.0776
ENSMUSG00000014074	Rnf168	19.8625	36.2309	83.9188	73.6946	37.1688	28.2397	9.44566	36.6974	37.5555	38.0097	63.4319	79.9425	38.8457	51.2199	64.2364	41.6318
ENSMUSG00000014075	Tctex1d2	31.3477	17.8471	16.448	15.1154	19.5872	22.3205	23.917	11.8407	17.6055	20.1746	17.6123	16.945	22.8548	16.2364	12.7445	9.37978
ENSMUSG00000014077	Chp1	56.2902	56.7618	38.3787	55.5863	65.6967	61.464	48.4234	31.0841	55.8728	53.901	45.7508	44.916	42.2777	44.3795	53.9911	44.1932
ENSMUSG00000014104	Sval2	0	0	0	0	0	0	0	0	0	0	0	0	0	0	0	0
ENSMUSG00000014158	Trpv4	5.69528	3.37388	4.39328	2.48472	0.224925	7.18362	3.65058	6.8413	3.76811	5.57907	2.04675	0.0295209	7.20407	2.04459	5.22895	2.61551
ENSMUSG00000014164	Klhl3	0.757267	2.58792	4.21469	2.10825	7.60995	4.0866	18.5639	5.22745	1.29791	7.97267	2.13274	2.59784	3.18044	4.46501	3.2969	2.65159
ENSMUSG00000014177	Tvp23b	59.193	57.7202	45.2722	46.8333	38.2747	52.3562	94.5385	44.6263	64.2882	46.7022	51.2891	54.3331	61.2124	44.3495	38.2866	48.4141
ENSMUSG00000014195	Dnajc7	79.4972	81.5291	113.047	112.471	67.6273	66.9616	106.914	108.198	83.0869	92.5586	112.915	126.467	91.0789	84.8804	99.7578	99.2092
ENSMUSG00000014198	Zfp385c	0	0	0.0535766	0.0188237	0	0.586418	0.0163703	0.0175418	0.020934	0.017997	0.412789	1.37272	0	0.0300674	0	0.018038
ENSMUSG00000014226	Cacybp	159.436	138.368	226.647	193.112	136.548	144.186	352.338	205.239	186.522	133.052	259.163	226.322	175.161	161.357	207.102	197.246
ENSMUSG00000014232	Cluap1	13.5046	9.12482	13.2334	9.60007	8.52839	10.7938	19.0714	8.8586	10.3414	8.9985	12.2289	11.5279	7.48513	6.52463	8.45495	8.29749
ENSMUSG00000014243	Zswim7	12.8735	8.3772	4.89333	6.30593	10.8526	9.98744	25.8814	7.56051	7.43156	15.0635	8.73737	10.6866	12.3815	8.59929	4.55539	8.02692
ENSMUSG00000014245	Pigl	7.71465	8.20467	13.3942	14.833	10.2716	10.299	0.55659	14.1562	11.3043	5.21913	14.31	15.8232	11.775	10.5687	9.23486	12.4282
ENSMUSG00000014294	Ndufa2	183.448	102.673	110.85	85.2524	120.56	126.831	174.033	107.952	108.124	97.5258	103.352	97.965	116.804	93.645	95.5569	110.627
ENSMUSG00000014301	Pam16	16.1708	16.486	15.8765	16.2448	14.9575	20.543	32.2659	18.8399	16.8518	17.1331	18.9883	19.8528	16.4643	16.4619	15.0842	17.3345
ENSMUSG00000014303	Glis2	3.20261	4.84996	1.69659	3.72709	3.82372	5.82753	0.0327406	4.61349	8.22705	5.65106	4.26549	3.91151	2.75145	1.12753	5.54801	2.23672
ENSMUSG00000014313	Cox6c	214.953	94.3154	103.992	111.173	105.115	117.723	248.698	98.1288	122.422	102.223	105.554	129.582	135.576	97.8695	97.6485	100.039
ENSMUSG00000014329	Bicc1	0	0.0191698	0	0	0.0374874	0	0.245555	0	0	0	0	0.0147604	0	0	0	0
ENSMUSG00000014349	Ube2z	74.1648	96.9991	90.1873	117.158	87.908	79.7162	69.7048	93.4451	87.8598	98.5156	74.7836	73.7283	91.0198	84.4444	92.6322	87.4484
ENSMUSG00000014351	Gip	0	0	0	0	0	0	0	0	0	0	0	0	0	0	0	0.018038
ENSMUSG00000014353	Tmem87b	16.1392	14.8949	16.1801	14.0801	12.1459	11.3069	21.1832	10.911	7.91304	8.15264	18.7131	7.04073	21.5234	9.50131	6.15067	11.2738
ENSMUSG00000014355	Anapc1	373.885	423.518	377.036	448.248	361.566	360.977	109.894	285.422	502.143	471.054	343.389	324.538	348.28	420.012	418.157	462.261
ENSMUSG00000014361	Mertk	11.9743	0.421735	1.64302	5.53416	0.712261	0.989581	71.571	2.57864	1.1095	1.60173	0.447188	0.236167	7.70702	5.83308	1.7548	5.62787
ENSMUSG00000014402	Tsg101	96.8355	116.169	98.1345	95.5489	89.5762	94.8348	150.378	125.406	88.4879	106.416	106.706	116.725	102.869	96.0053	104.774	75.0382
ENSMUSG00000014418	Hps5	49.6641	59.1963	51.8264	52.518	54.8066	56.3145	57.5089	39.241	66.6956	73.0138	52.321	48.9899	35.1624	62.2246	48.4077	34.8495
ENSMUSG00000014426	Map3k4	60.3762	81.0499	77.2039	89.4877	72.7256	50.7435	13.8165	70.4829	105.382	69.9184	97.7278	105.773	81.0347	82.6704	81.8375	91.9759
ENSMUSG00000014444	Piezo1	85.9024	87.8743	153.801	100.349	80.1107	71.0849	164.227	144.369	88.6763	68.4246	95.2511	73.3889	87.2772	71.5154	141.27	122.136
ENSMUSG00000014453	Blk	0	0	0.0178589	0	0.0187437	1.08121	0.0654812	0	0	0.665889	0.0171995	0	0.0147927	0.0150337	0	0
ENSMUSG00000014470	Rnf166	128.877	170.017	155.926	147.032	160.315	141.767	60.0463	171.173	163.934	133.754	130.39	151.59	166.64	133.845	141.04	144.683
ENSMUSG00000014496	Ankrd28	40.782	82.1234	101.581	66.9746	71.6385	54.1704	13.44	79.0433	75.6135	81.4904	86.2557	53.8165	53.7273	47.0555	71.8405	52.9055
ENSMUSG00000014498	Ankrd52	5.47441	4.35154	7.96506	5.98592	8.15352	0.586418	6.71182	3.84165	1.84219	0.863856	8.39338	8.00015	3.4763	1.1576	7.23191	4.70793
ENSMUSG00000014503	Pkd2l2	3.61279	4.65826	5.75056	6.49416	2.56789	5.36939	7.35027	3.12244	7.55716	4.62523	6.24344	5.16615	3.84611	4.11924	7.16101	2.83197
ENSMUSG00000014504	Srp19	56.1166	41.9052	64.792	47.9062	38.3309	40.6644	72.5532	68.1674	54.9307	43.4988	70.6729	77.2709	50.8723	45.7777	54.0798	56.9821
ENSMUSG00000014529	Tmbim7	0.599503	0.709282	0	0.056471	0.412362	0.641395	0	0.771839	0.983896	0	0	0.132844	0.310648	0.24054	0.301329	0.505065
ENSMUSG00000014542	Clec4f	0	0	0	0	0	0	0	0	0.020934	0	0	0.0295209	0	0.0300674	0	0
ENSMUSG00000014543	Klra17	0.0946583	0	0	0.150589	0	0	0	0	0	0	0	0	0	0.0300674	0	0.0360761
ENSMUSG00000014547	Wdfy2	29.6596	41.2151	54.7553	36.612	25.5664	33.939	65.3011	55.204	42.8309	51.7054	41.0381	35.1593	56.2568	28.8046	52.6795	40.5856
ENSMUSG00000014550	Rbsn	48.0864	53.6179	63.6847	69.9676	58.1618	38.0805	33.7392	45.2403	38.8744	58.8142	49.0015	58.5546	52.1	74.3117	48.9572	53.8976
ENSMUSG00000014551	Mrps25	48.0233	44.934	50.487	46.0427	36.2129	45.649	43.9052	45.9419	47.0805	32.4846	60.25	55.145	48.0912	42.0192	43.2851	53.573
ENSMUSG00000014554	Dguok	101.016	84.0979	57.952	58.7675	74.1689	78.58	71.6037	75.9735	76.2834	68.4426	66.4075	75.3225	91.9221	79.1676	52.9454	63.097
ENSMUSG00000014592	Camta1	22.3867	18.288	19.5733	18.9554	22.455	26.4988	43.8233	21.2256	16.6216	19.4008	19.4011	28.9157	27.1447	19.153	18.3634	27.4539
ENSMUSG00000014599	Csf1	14.6563	13.4764	8.32223	13.6472	9.29688	6.94539	53.5145	12.2793	12.9163	12.022	10.1993	7.92635	14.349	21.0171	16.7149	7.99085
ENSMUSG00000014601	Strip1	122.377	145.115	110.35	68.6875	126.501	156.024	31.1363	106.11	140.32	169.73	136.203	123.25	132.099	152.412	107.061	110.717
ENSMUSG00000014602	Kif1a	0.378633	0	0.500048	0.0376473	0.0374874	0.0549767	3.01214	0.140334	0.0418679	0.035994	0	0.0590417	0.059171	0.225506	0.177253	0.396837
ENSMUSG00000014603	Alx3	0	0	0.0178589	0.0376473	0	0.0183256	0	0	0	0	0	0	0	0	0	0
ENSMUSG00000014606	Slc25a11	182.217	208.97	152.05	164.764	194.878	236.693	183.789	145.281	209.612	196.419	178.669	178.454	192.912	224.303	154.653	145.819
ENSMUSG00000014609	Chrne	0.0157764	1.03517	0	0.0376473	0.0937186	0	0.0654812	0.473628	0.188406	0.017997	0	0	0.16272	0.556248	0.106352	0
ENSMUSG00000014633	Cmc2	36.7432	28.8122	30.1815	33.2991	34.3572	28.8811	28.6971	32.7505	28.8889	25.5198	37.9594	38.0376	26.2423	24.3697	24.7976	35.5169
ENSMUSG00000014668	Chfr	44.6472	46.9276	56.7198	60.1793	35.6318	44.2196	14.8151	61.6769	55.3494	49.0058	63.0707	61.6248	34.0677	45.4319	56.0473	46.2134
ENSMUSG00000014686	Ceacam16	0.536397	0	0	0.0752947	0	0	0.343776	0	0	0	0	0	0	0	0	0
ENSMUSG00000014704	Hoxa2	0.599503	0.191698	0.285742	1.46825	1.1996	0	0	0	0.020934	0.017997	0	0	0.207098	0.676517	0.0177253	0.144304
ENSMUSG00000014725	Adam28	0	0	0	0	0	0	0	0	0	0	0	0	0	0.0300674	0	0
ENSMUSG00000014747	Ankrd53	0	0	0	0	0.0374874	0	0	0.0175418	0	0	0	0	0.0147927	0	0	0
ENSMUSG00000014748	Tex261	185.231	208.606	179.035	202.674	199.115	199.034	93.3762	198.924	196.654	190.552	195.834	225.407	153.238	184.163	173.583	200.024
ENSMUSG00000014763	Fam120b	58.1202	55.3048	47.7903	43.6333	50.608	55.3432	28.6808	59.3965	58.343	63.6014	50.3259	44.8717	58.742	59.1276	47.7164	54.2223
ENSMUSG00000014767	Tbp	38.2104	37.9562	54.1302	52.7439	47.609	45.9789	96.6503	59.7123	62.8647	41.6991	64.6015	66.7467	56.0053	49.04	51.4387	41.722
ENSMUSG00000014769	Psmb1	443.695	300.621	271.633	233.056	336.506	386.651	506.808	251.111	330.024	309.423	287.404	302.456	377.984	327.66	269.14	299.54
ENSMUSG00000014771	Pdcd2	0	0	0	0	0	0	0	0	0	0	0	0	0	0	0	0
ENSMUSG00000014773	Dll1	0.252422	0	0	0.0376473	0	0	0.55659	0	1.65378	0.035994	0	2.47975	0.0887565	0.12027	0.0531758	0
ENSMUSG00000014776	Nol3	0.504844	0	0.0357177	0.056471	0	0.0366511	0.327406	0	0.125604	0.053991	0	0.0147604	0.103549	0.0300674	0	0.0360761
ENSMUSG00000014778	Fhod1	1.04124	1.28438	0.535766	1.60001	0.674774	0.421488	1.22777	0.280669	0.502415	1.43976	1.04917	0.590417	1.03549	0.541214	0.248154	1.20855
ENSMUSG00000014782	Plekhg4	0.0631056	0	0	0.0376473	0.50608	0.0183256	0.0163703	0	0.314009	0	0.0171995	0	0.0147927	0.0451012	0	0
ENSMUSG00000014786	Slc9a5	0.39441	0.536754	0.464331	3.27532	0.0374874	1.48437	1.2114	11.332	0.020934	0.071988	2.61433	1.72697	1.44969	2.08969	0	0
ENSMUSG00000014791	Elmo3	3.45503	5.06082	1.62516	5.00709	5.64186	4.58139	0.163703	3.92936	7.49436	3.83336	1.08357	0	3.2544	5.50234	0.0886263	3.80602
ENSMUSG00000014813	Stc1	0.0315528	0	0	0	0.0187437	0.0366511	0	0	0	0	0	0	0	0	0	0
ENSMUSG00000014837	4931428F04Rik	6.97316	16.3327	12.8405	15.6425	21.0867	16.9695	0.703923	12.8932	14.1932	8.56657	15.4452	20.6794	7.9437	13.7108	15.0665	10.2276
ENSMUSG00000014846	Tppp3	8.32993	0.785961	0.839367	2.29649	0.65603	2.01581	23.8188	1.15776	2.76328	1.54774	1.34156	1.43176	6.21295	2.60083	0.691285	2.48925
ENSMUSG00000014850	Msh3	37.1692	38.4354	32.7889	36.0473	29.184	24.6845	43.3486	54.6076	37.5555	25.5378	31.028	55.8092	40.0588	27.7372	36.8863	33.7492
ENSMUSG00000014852	Adamts13	0.0157764	0	0	0	0.0374874	0	0	0	0	0.017997	0.0343991	0	0.0295855	0	0	0
ENSMUSG00000014856	Tmem208	56.9843	50.0907	45.933	45.2521	54.1131	73.8521	53.5636	43.3458	66.4863	52.3173	51.2719	63.1156	50.251	43.703	41.8848	44.8245
ENSMUSG00000014859	E2f4	160.777	185.851	261.4	219.992	181.664	182.779	67.593	291.071	180.995	156.142	265.664	259.001	164.081	177.022	273.182	246.49
ENSMUSG00000014867	Surf4	406.873	413.109	420.469	368.643	408.163	439.612	215.695	347.082	390.377	422.444	443.714	416.126	357.422	395.657	391.781	428.89
ENSMUSG00000014873	Surf2	27.656	20.1666	33.9319	26.0896	14.9575	17.4459	49.0782	27.9265	23.6972	22.1903	30.4432	27.2478	21.0057	21.0021	20.8095	26.2994
ENSMUSG00000014905	Dnajb9	20.9037	19.0739	14.8407	18.0895	23.3547	23.7499	20.0045	14.0861	21.7085	21.1285	10.7669	12.9744	27.6624	16.2214	14.1979	16.8114
ENSMUSG00000014907	Naf1	5.6795	4.8883	4.76832	8.94124	5.19201	4.6547	1.99718	4.63103	5.65217	5.02116	4.81587	1.83029	7.01176	5.51738	4.9808	8.62218
ENSMUSG00000014932	Yes1	4.43317	2.2237	2.01805	2.10825	1.48075	0.934604	2.75021	2.05239	4.81481	2.17764	1.15237	0.841345	6.34609	1.63868	0.0177253	1.26266
ENSMUSG00000014956	Ppp1cb	221.832	209.027	164.641	188.67	198.777	200.793	261.908	153.385	219.702	222.641	142.498	176.225	239.746	173.67	160.502	150.131
ENSMUSG00000014959	Gorasp2	173.241	229.29	242.077	224.962	216.303	223.645	209.736	225.798	195.67	186.665	252.042	240.403	164.584	227.19	218.942	239.635
ENSMUSG00000014980	Tsen15	33.2882	42.4611	30.0922	38.0614	31.9393	34.4337	30.2196	35.031	35.1691	28.8312	31.372	42.82	48.4167	32.3225	31.4801	26.7504
ENSMUSG00000015001	Oc90	0	0	0	0	0	0	0	0	0.0418679	0	0	0	0	0	0	0
ENSMUSG00000015002	Efr3a	175.986	199.27	173.517	193.206	174.804	164.124	86.1733	171.032	173.878	200.289	186.477	204.461	169.229	179.518	188.455	180.903
ENSMUSG00000015013	Trappc2l	25.6366	18.3072	15.3229	16.3201	20.8805	15.5951	43.5941	17.612	19.8454	21.7764	20.0375	16.9007	19.1862	21.844	14.5347	20.9241
ENSMUSG00000015016	Acsf3	14.5143	22.4095	21.5021	27.4073	23.5796	23.2185	2.04629	9.05156	19.1755	27.5894	16.288	12.384	14.9555	11.0799	21.483	17.0099
ENSMUSG00000015023	Ddx19a	34.361	37.6686	44.2721	53.8921	46.297	35.0385	18.5476	50.5204	48.818	38.4056	44.6672	38.569	48.2835	48.2582	50.4815	53.2483
ENSMUSG00000015027	Galns	38.9204	36.2692	37.4679	31.2661	24.7792	44.916	69.5738	37.9078	41.3027	28.9932	41.6229	22.5097	35.1771	34.0063	20.9513	30.809
ENSMUSG00000015053	Gata2	346.229	569.803	370.286	448.38	483.344	366.053	3.71606	435.019	458.517	478.774	356.443	444.23	373.472	418.674	412.644	403.763
ENSMUSG00000015083	C8g	2.52422	6.03848	3.50034	3.65179	7.60995	6.67051	0.687553	5.42041	4.438	12.058	6.60463	4.72334	6.78987	5.45724	4.92762	4.02248
ENSMUSG00000015085	Entpd2	0.773043	0.210868	0.714355	0.0752947	0.374874	0	0	0.0526254	0	0	0.120397	0.516615	0.828394	0.706585	0	0
ENSMUSG00000015087	Rabl6	60.108	76.8709	96.0986	114.015	87.0083	60.511	60.6029	118.091	71.5732	77.2431	98.7426	97.7288	68.1946	65.5771	98.3929	100.833
ENSMUSG00000015090	Ptgds	3.69168	4.12151	3.50034	2.59767	3.39261	5.20446	4.92746	2.1401	2.36554	4.85919	4.28269	4.84142	6.03544	3.32245	3.5096	3.37311
ENSMUSG00000015092	Edf1	151.611	89.3121	119.887	119.888	105.115	108.469	300.493	132.739	103.184	98.9835	133.314	121.021	120.014	108.709	109.808	122.821
ENSMUSG00000015093	Clic3	0	0.824301	0.446472	0	0.431106	0.403163	0	2.63127	0.020934	0.431928	0.670782	0.915147	0.236684	0	0.372231	0.450951
ENSMUSG00000015094	Npdc1	17.8431	25.285	3.2146	8.26359	19.531	19.5534	2.35732	3.01719	11.6602	17.6911	6.43263	9.66808	14.8075	10.3733	3.26145	2.9402
ENSMUSG00000015095	Fbxw5	106.853	131.39	103.742	130.297	137.898	143.929	24.9647	122.968	130.46	117.34	112.967	108.283	112.321	123.712	119.823	106.046
ENSMUSG00000015112	Slc25a13	73.376	63.682	63.5061	68.9887	72.9693	68.8675	36.293	61.4138	74.2109	86.3496	74.9212	56.2963	85.221	69.2754	72.1773	55.7014
ENSMUSG00000015120	Ube2i	196.905	205.749	202.716	211.559	201.495	210.103	304.291	217.781	219.66	194.89	227.688	217.274	226.802	197.468	200.703	204.064
ENSMUSG00000015126	Tsr3	26.0784	24.7865	31.3602	21.9484	31.7144	33.8107	65.7268	20.1555	24.6393	32.2866	37.925	21.0927	28.5352	35.0135	23.6632	38.6375
ENSMUSG00000015127	Unkl	11.5483	15.4317	12.0369	13.1954	10.9838	10.6472	3.29043	11.4197	13.1884	11.6441	12.0913	8.75294	8.38749	9.21567	12.3013	17.1542
ENSMUSG00000015133	Lrrk1	61.6699	97.6509	108.886	75.69	104.534	52.8509	22.7056	107.408	112.499	60.308	81.2335	57.0638	83.7121	99.7638	83.8759	68.7971
ENSMUSG00000015134	Aldh1a3	0.631056	0.191698	0.142871	0.35765	0.112462	0.0366511	4.60006	0.175418	0.0837359	0.17997	0.412789	0.0590417	0.221891	0.856922	0.124077	0.577217
ENSMUSG00000015143	Actn1	14.2461	11.0226	10.5725	19.1437	11.2275	8.63134	50.8298	9.33223	8.49919	15.5854	5.36626	7.18833	22.766	13.5454	8.47268	12.1757
ENSMUSG00000015149	Sirt2	68.9902	74.4938	85.669	75.0311	60.6922	73.6871	119.454	61.8874	70.8824	66.391	59.2352	74.5549	59.9106	58.4361	71.6632	91.543
ENSMUSG00000015165	Hnrnpl	613.891	503.475	416.094	481.396	560.531	520.153	75.2052	405.864	512.463	539.856	337.386	349.601	503.382	555.316	455.185	448.407
ENSMUSG00000015176	Nolc1	110.356	152.304	293.475	305.583	123.634	133.612	91.3136	283.581	145.282	109.152	314.356	303.548	181.004	160.35	266.003	253.543
ENSMUSG00000015189	Casd1	107.343	112.373	110.779	96.5277	109.482	100.956	20.1682	63.1154	113.755	92.3066	91.0716	82.5256	132.928	103.432	134.003	109.545
ENSMUSG00000015202	Cnksr3	31.1741	41.3301	26.7883	41.5626	42.3795	25.894	7.02286	30.207	32.2174	45.1185	25.4553	44.8865	42.0706	53.2494	24.0709	21.4653
ENSMUSG00000015214	Mtmr1	58.9406	80.609	82.3651	68.5934	69.9703	79.7529	19.6935	65.7642	75.5088	92.3966	78.0859	72.2818	77.0998	87.4662	57.5894	77.7259
ENSMUSG00000015217	Hmgb3	141.593	170.534	178.642	171.879	163.014	154.796	129.063	163.753	173.898	139.171	165.305	197.923	175.146	142.159	163.693	156.209
ENSMUSG00000015222	Map2	0.410186	0	0.0357177	0.263531	0.0374874	0.0916279	1.09681	0.0350836	0.0418679	0.017997	0	0	0.147927	0.0902023	0.106352	0.216456
ENSMUSG00000015224	Cyp2j9	40.9871	34.4098	20.1627	21.0072	34.6009	28.9727	0.147333	27.2249	35.7343	45.7664	26.4701	28.5614	49.8516	36.4117	21.1108	17.6773
ENSMUSG00000015242	Nipsnap3a	0.205093	0.0383396	0.0892944	0.0752947	0.0562312	0.0366511	0.114592	0	0.0628019	0.107982	0.103197	0.0590417	0.118342	0.0150337	0.0354505	0.018038
ENSMUSG00000015243	Abca1	79.8759	22.2753	23.0915	35.4826	17.6753	26.0773	334.904	20.2432	14.3398	23.4501	5.72745	5.72705	61.7597	38.2157	28.9985	38.439
ENSMUSG00000015247	Nipsnap3b	106.207	99.2803	66.0064	77.61	85.9212	89.8686	139.377	72.9738	83.3172	102.565	83.7962	83.2783	97.7505	83.2417	88.0237	78.3211
ENSMUSG00000015289	Lage3	52.9771	52.8895	51.8264	45.9297	53.5695	61.5556	85.3711	52.4149	56.103	44.9205	56.3973	44.6208	58.8012	51.8212	48.3368	40.8922
ENSMUSG00000015290	Ubl4a	100.291	94.3921	96.1879	115.163	75.0686	105.097	131.388	107.794	96.1078	78.053	109.63	90.4519	96.5227	81.0618	88.4668	90.2262
ENSMUSG00000015290	Ubl4a	100.291	94.3921	96.1879	115.163	75.0686	105.097	131.388	107.794	96.1078	78.053	109.63	90.4519	96.5227	81.0618	88.4668	90.2262
ENSMUSG00000015291	Gdi1	51.1786	70.1231	55.7733	48.4521	40.6176	55.6731	31.2836	71.7284	57.4428	61.2438	54.4882	60.9311	65.1768	54.7528	50.6411	42.5517
ENSMUSG00000015305	Sash1	1.97205	0.536754	0.357177	0.865889	0.768492	1.7226	11.7702	0.333294	0.355877	1.25979	0.275193	0.708501	2.89938	1.54847	0.726736	0.667407
ENSMUSG00000015312	Gadd45b	8.80323	5.04166	12.6441	11.8024	5.56688	3.09702	17.3034	14.472	5.25443	5.75904	12.9857	4.87094	8.74251	7.51686	10.5643	11.0573
ENSMUSG00000015314	Slamf6	0.773043	0.670943	1.32156	1.1106	2.45543	1.61265	0.0654812	1.40334	0.293076	1.1878	0.584785	0.0295209	1.93785	1.00726	2.83604	2.7057
ENSMUSG00000015316	Slamf1	5.96348	8.39637	8.94729	9.97654	6.09171	6.87209	0.196444	1.98222	7.80837	16.0893	9.51135	5.85989	4.4822	3.45776	10.4756	4.63577
ENSMUSG00000015335	Zdhhc12	15.3189	21.9302	23.1808	19.0872	19.8496	13.6709	28.0914	23.1552	15.219	23.0002	16.3396	14.9376	14.9703	14.6729	17.3353	18.1643
ENSMUSG00000015337	Endog	16.8176	14.8374	15.055	11.1436	17.6566	15.8333	6.69545	15.5245	13.1256	14.1276	14.9636	8.53153	10.1774	13.8611	14.1802	13.9434
ENSMUSG00000015340	Cybb	162.718	9.35486	32.4496	82.7112	16.4195	12.9012	1045.82	57.6599	21.6876	28.8852	14.2928	4.91522	146.241	92.1116	34.7415	100.508
ENSMUSG00000015341	Golga7	99.3755	128.303	124.673	120.528	132.706	124.009	239.825	129.704	131.57	119.194	135.825	137.862	134.525	136.401	116.473	104.963
ENSMUSG00000015342	Xk	26.3466	21.6427	36.5392	28.7814	36.569	18.7654	1.30962	22.664	26.314	26.0597	24.1998	42.4215	12.4111	20.8518	30.1684	26.7684
ENSMUSG00000015354	Pcolce2	0	0	0	0	0	0	0	0	0	0	0	0	0.0887565	0	0.0177253	0
ENSMUSG00000015355	Cd48	245.907	223.079	226.665	185.733	239.882	238.892	242.592	220.237	200.254	198.471	221.307	205.878	224.554	242.088	199.906	162.757
ENSMUSG00000015357	Clpx	61.6541	70.8515	58.0592	79.1912	65.3968	57.469	102.118	79.5345	89.6183	73.8057	79.1523	92.8579	59.7923	60.6611	72.904	89.2161
ENSMUSG00000015363	Trabd	98.2711	111.338	115.743	117.309	122.959	108.634	31.431	97.1464	119.868	138.649	131.026	114.142	88.076	98.4107	103.019	94.3389
ENSMUSG00000015365	Mov10l1	0	0	0	0	0	0	0	0	0	0.017997	0.0171995	0	0	0	0	0
ENSMUSG00000015377	Dennd6b	2.54	2.97132	2.37523	0.282355	3.46759	0.549767	1.98081	1.19284	8.22705	0.755874	5.76185	3.73439	6.07982	0.886989	7.26736	3.57153
ENSMUSG00000015396	Cd83	13.2048	2.31954	2.16092	5.30827	5.81055	1.81423	75.0742	2.92948	1.33977	1.99767	0.945975	0.236167	12.0561	6.5998	1.9675	5.91647
ENSMUSG00000015401	Cltrn	0.883478	0.115019	0	0.414121	0.50608	0.403163	0	0	0	0	0	0	0	0	0	0
ENSMUSG00000015405	Ace2	0	0	0	0	0	0	0	0	0	0	0	0	0	0	0	0.0360761
ENSMUSG00000015437	Gzmb	0	0.230037	3.53606	1.20471	2.04307	0	0	5.98175	1.77939	3.67139	3.49151	5.99273	7.29282	15.3945	14.3929	4.49147
ENSMUSG00000015441	Gzmf	0	0	0	0	0	0	0	0	0	0	0	0	0	0	0	0
ENSMUSG00000015443	Gzmn	0	0	0	0	0	0	0	0	0	0	0	0	0	0	0	0
ENSMUSG00000015451	C4a	0.78882	0.249207	0.196448	0.320002	0.14995	0.311535	0.753034	0	0.439613	0.377937	0.257993	0.250927	0.16272	0.315708	0.265879	0.126266
ENSMUSG00000015452	Ager	0.631056	0.095849	0.303601	0.338826	0.899698	0	0.0327406	0	0.565217	0.035994	0	0.0147604	0.221891	0	0.0531758	0.0360761
ENSMUSG00000015461	Atf6b	137.554	173.218	186.786	177.526	150.568	197.421	63.3531	197.977	126.546	154.54	185.308	155.87	128.061	194.176	193.755	196.669
ENSMUSG00000015467	Egfl8	0	0.0575094	0.0535766	0.414121	0.412362	0	0.0163703	0	0	0.593901	0.103197	0	0.0295855	0	0.0177253	0
ENSMUSG00000015468	Notch4	1.4672	1.47607	0.589343	1.65648	0.374874	1.17284	0.785775	0.578879	1.42351	6.19097	1.28997	1.03323	1.36093	2.42043	5.2644	1.87596
ENSMUSG00000015474	Ppt2	20.4304	29.7707	21.8235	24.4143	26.4849	27.1402	23.6387	25.5584	29.4332	29.3351	23.0474	26.6426	26.7157	31.5107	21.1285	26.6782
ENSMUSG00000015476	Prrt1	2.33491	2.68377	1.6073	2.52237	1.66819	0.806325	0.0163703	3.47327	0.837359	1.52975	0.722381	2.02218	2.55914	2.55573	1.87888	2.25475
ENSMUSG00000015478	Rnf5	28.2713	26.301	29.61	33.7885	27.7032	28.1298	41.2859	31.049	31.8615	32.9165	36.979	36.3254	29.0234	25.2416	37.0103	34.9938
ENSMUSG00000015484	Fam163a	0	0	0	0	0	0	0	0	0	0.017997	0	0	0	0	0	0
ENSMUSG00000015488	Cacfd1	29.1548	44.3589	43.8078	19.3884	44.5913	43.5049	31.9712	23.1376	39.4605	34.1943	33.3843	26.9821	29.3192	38.0654	19.9055	43.7061
ENSMUSG00000015501	Hivep2	3.78633	7.59124	9.66165	8.33888	6.39161	5.29609	6.69545	4.80645	13.0628	0.917847	5.62425	7.77875	2.63311	7.77243	0.248154	2.43513
ENSMUSG00000015519	2310057J18Rik	0	0	0	0	0	0	0	0	0	0	0	0	0	0	0	0
ENSMUSG00000015522	Arnt	71.3408	75.874	72.4534	76.0852	73.6253	67.8413	40.1236	43.3984	93.7214	68.6046	77.9484	48.5323	84.8512	64.7803	56.3486	91.1822
ENSMUSG00000015533	Itga2	5.96348	11.2335	2.8217	7.04005	8.41593	1.35609	0.0327406	5.22745	9.75523	0	3.16472	4.41337	3.13606	5.54744	2.69424	0.739559
ENSMUSG00000015536	Mocs2	32.1996	29.7323	30.9673	30.1367	25.6039	24.6845	68.1005	28.1721	32.9501	30.037	25.4381	44.6798	33.0322	38.4262	31.9055	25.4517
ENSMUSG00000015542	Nat9	15.24	19.9366	15.4301	19.219	20.5993	20.4697	18.5312	17.647	12.2045	19.0948	19.6591	15.7494	16.4495	19.9948	15.2792	21.8982
ENSMUSG00000015568	Lpl	379.675	15.585	57.7199	167.06	31.5269	29.9257	2330.17	86.9371	40.9678	51.3994	4.76427	4.251	326.683	200.339	67.2496	186.116
ENSMUSG00000015575	Atp6v0e	264.113	184.318	160.694	159.098	199.771	204.33	540.236	158.157	191.022	180.816	156.636	173.878	214.421	179.503	171.776	180.867
ENSMUSG00000015579	Nkx2-5	0.0315528	0.172528	0.0178589	0.0376473	0	0	0	0.0350836	0.0418679	0.017997	0	0.0295209	0	0	0.0177253	0
ENSMUSG00000015597	Zfp318	8.31416	7.78294	6.76851	10.4283	8.37844	2.74884	11.8685	12.3845	8.12238	6.91085	8.94376	6.65695	5.22184	6.05859	5.61891	13.5285
ENSMUSG00000015599	Ttbk1	0.489068	0.115019	0.107153	0.790594	1.21834	0.16493	0.0654812	0.0526254	0.020934	0.809865	0.429989	0.265688	3.59464	0.435978	0.194978	0.829749
ENSMUSG00000015605	Srf	41.3026	42.5761	43.6292	54.4569	46.953	41.7457	13.5382	27.3126	36.5716	44.1647	45.6476	43.8532	38.8457	27.3614	43.6928	54.9438
ENSMUSG00000015619	Gata3	14.7983	22.8696	15.6801	9.11065	21.0867	18.179	0.0654812	10.6479	21.9807	14.9735	11.1625	21.2255	26.1684	17.7548	11.4328	8.94686
ENSMUSG00000015627	Gata5	0	0	0.0178589	0	0	0	0	0	0	0.017997	0	0	0	0	0	0
ENSMUSG00000015647	Lama5	0.96236	0.095849	0.16073	0.188237	2.84905	0.0916279	0.261925	5.73617	0.0837359	0.17997	0.309592	0.0147604	1.71596	0.195438	0.0886263	0.108228
ENSMUSG00000015652	Steap1	0	0.0191698	0	0	0	0	0.261925	0	0	0.251958	0	0	0.0295855	0	0	0.018038
ENSMUSG00000015653	Steap2	0.0157764	0.0766792	0	0.225884	0.0187437	0.0549767	0.785775	0	0.0628019	0.089985	0	0.0295209	0.147927	0.0902023	0.070901	0
ENSMUSG00000015656	Hspa8	1499.48	2055.17	2660.01	2307.67	1545.79	1505.17	3470.41	2597.85	2230.56	1997.49	3250.85	3127.63	1647.73	1816.89	2125.29	2504.42
ENSMUSG00000015659	Serac1	1.90894	2.26204	2.28594	3.1059	1.38704	2.96874	5.1239	2.70144	0.0418679	0.863856	3.6979	1.22512	1.44969	0.841888	2.87149	2.50729
ENSMUSG00000015665	Awat1	0	0	0	0	0	0	0	0	0.020934	0	0	0	0	0.0150337	0	0
ENSMUSG00000015668	Pdzd11	38.2893	39.7773	33.5568	34.3155	30.4773	40.4262	61.847	35.8379	39.9001	34.1583	47.1784	45.5802	40.325	30.759	32.8981	31.9814
ENSMUSG00000015671	Psma2	272.947	245.853	223.307	218.825	253.471	261.194	438.659	241.428	230.755	226.402	270.514	223.65	252.157	241.637	225.058	220.028
ENSMUSG00000015672	Mrpl32	39.2359	31.0551	25.1631	28.612	28.6404	30.2738	31.3	26.9266	32.2383	29.3531	33.7455	36.0893	34.4671	31.6309	35.2555	25.9387
ENSMUSG00000015697	Setdb1	58.7828	73.382	92.6161	94.7395	55.2002	50.1204	21.8871	69.5181	100.483	97.3098	86.8577	71.8538	88.86	75.7248	82.7238	76.9683
ENSMUSG00000015702	Anxa9	18.5215	23.6939	12.0905	11.3883	8.86578	8.99786	2.39006	14.051	29.6425	17.3311	9.58015	12.4578	13.6241	10.4033	9.71344	11.869
ENSMUSG00000015709	Arnt2	1.15168	0	0.0714355	0.677652	0.0374874	0.0733023	4.05984	0.315752	0	0.071988	0	0.0442813	0.636088	0.541214	0.248154	0.505065
ENSMUSG00000015711	Prune1	22.86	29.1381	22.5915	27.3884	37.0938	25.9673	14.9788	21.0501	33.6199	43.2288	20.8803	22.8344	20.34	37.1483	26.0384	33.4786
ENSMUSG00000015714	Cers2	359.402	359.664	297.422	320.605	283.255	292.513	316.536	302.315	411.855	360.048	324.727	288.64	334.878	342.423	307.906	316.369
ENSMUSG00000015721	Nlrp5	0	0	0	0.0376473	0	0	0	0	0	0	0	0	0	0	0	0
ENSMUSG00000015733	Capza2	574.418	482.715	442.614	441.942	429.4	448.665	1334.95	410.145	517.174	455.414	470.906	500.261	570.024	475.276	431.858	395.033
ENSMUSG00000015745	Plekho1	42.4385	23.3488	31.6638	38.2873	38.6495	29.8157	103.853	23.9972	27.884	36.6599	20.7771	20.6941	49.3634	39.3282	32.0295	32.0536
ENSMUSG00000015747	Vps45	43.7006	34.7548	33.9854	27.012	30.3461	22.1006	55.7409	35.7502	33.0966	30.199	39.6794	32.1925	28.7127	28.3987	35.4151	32.739
ENSMUSG00000015748	Prpf3	52.2514	56.1867	91.4731	74.937	34.7321	47.0234	34.7214	78.1487	67.847	51.4894	78.9115	88.0755	71.7596	55.0384	70.068	73.9018
ENSMUSG00000015749	Anp32e	261.273	285.783	370.518	401.113	276.976	273.949	119.962	299.052	275.24	254.208	396.966	359.682	223.888	266.638	338.109	352.571
ENSMUSG00000015750	Aph1a	21.5979	24.8632	22.1629	27.8967	25.0791	31.7399	21.4287	23.1201	25.351	18.9508	21.6542	25.4027	18.8608	22.0244	19.1965	24.64
ENSMUSG00000015755	Tab2	12.4791	9.35486	16.698	14.9272	7.44126	8.57637	23.3604	15.3841	4.52174	12.4359	14.5508	13.6386	14.9259	18.1457	12.6736	14.683
ENSMUSG00000015757	Ppil4	39.9616	60.0973	87.8835	65.6381	48.6587	46.1071	25.3903	75.57	66.4235	39.6294	93.0324	79.0569	83.0613	51.0244	71.6278	73.4509
ENSMUSG00000015759	Cnih1	90.3356	76.8709	62.8989	71.6993	79.8482	83.4913	53.6455	65.9045	89.5764	85.4138	79.1007	80.1196	90.2062	74.913	70.2984	72.9458
ENSMUSG00000015766	Eps8	23.917	28.5246	15.6801	7.49182	20.2994	14.2023	10.1823	12.1214	34.8551	29.5151	23.0302	22.8049	19.1122	12.3126	14.8006	11.6886
ENSMUSG00000015776	Med22	134.746	137.371	118.172	121.488	149.163	137.79	34.4431	146.386	124.662	158.482	117.628	98.0535	116.286	126.96	102.417	119.43
ENSMUSG00000015787	Abo	0	0	0.0178589	0.225884	0	0.0366511	0	0	0.0628019	0	0	0	0.0443782	0	0	0.0721521
ENSMUSG00000015790	Surf1	42.3438	38.4163	33.3604	29.459	35.763	41.1592	73.4535	41.2758	39.0418	30.163	33.2123	35.9269	40.2659	38.5916	32.4195	31.8371
ENSMUSG00000015804	Med28	165.873	123.185	106.725	88.3583	113.137	120.894	302.474	102.076	113.985	116.045	109.699	137.154	141.892	120.811	92.9867	97.9465
ENSMUSG00000015806	Qdpr	139.763	115.786	93.8662	90.9371	122.621	124.247	66.7254	103.093	113.253	109.584	100.445	113.729	113.608	107.942	99.4387	95.7459
ENSMUSG00000015812	Gnrh1	0	0	0.0714355	0	0	0	0	0	0	0	0	0	0	0	0	0
ENSMUSG00000015829	Tnr	0.39441	0	0.107153	0.131766	0.0187437	0.0183256	1.01496	0.175418	0.0837359	0.053991	0.0515986	0.0885626	0.147927	0.330742	0.0886263	0.234494
ENSMUSG00000015837	Sqstm1	469.332	342.162	260.525	298.242	377.948	344.594	962.41	284.808	353.617	447.64	273.645	287.179	430.306	426.973	323.185	358.993
ENSMUSG00000015839	Nfe2l2	136.229	113.274	131.638	150.345	113.381	86.8815	322.397	139.124	122.003	135.841	139.523	153.184	145.516	130.372	113.956	171.975
ENSMUSG00000015843	Rxrg	0	0	0	0	1.01216	0.788	0.0327406	0	0	0	0	0.0442813	0	0	1.18759	0
ENSMUSG00000015846	Rxra	28.9812	15.8151	11.3761	6.32475	13.2331	22.2839	56.1993	4.19249	22.7971	17.1511	11.3861	13.5796	27.2482	7.99794	12.1064	12.7709
ENSMUSG00000015850	Adamtsl4	1.26211	2.91381	1.98233	3.03061	0.993417	0.16493	0.360147	0.842006	2.49114	4.8232	2.49393	3.24729	0.059171	3.00674	3.63368	1.6595
ENSMUSG00000015852	Fcrls	5.25354	0.153358	1.05367	2.82355	0.674774	0.476465	34.5577	1.42088	0.460547	1.1878	0	0	5.93189	1.87922	0.779912	2.92216
ENSMUSG00000015854	Cd5l	0.252422	3.12468	0.107153	0.0752947	1.7994	1.75925	1.01496	0.0350836	1.80032	0.251958	0.429989	0.0295209	0.443782	0.12027	0.0531758	1.01013
ENSMUSG00000015869	Prpsap1	128.041	161.621	142.246	114.711	145.826	136.819	67.3802	173.102	139.504	145.65	179.752	158.306	126.907	159.553	180.23	173.76
ENSMUSG00000015879	Fam184b	0.126211	0	0.0178589	0.20706	0.393618	0.0549767	0.147333	0.0175418	0.020934	0.053991	0.0515986	0.0147604	0.103549	0.0902023	0	0
ENSMUSG00000015880	Ncapg	63.9417	52.2185	70.7033	61.6475	60.2798	63.1866	1.84984	59.5368	85.9758	47.0082	72.3757	81.2414	57.1592	53.49	75.5982	71.6831
ENSMUSG00000015882	Lcorl	7.30447	9.23984	15.3765	12.7248	5.37945	5.6626	29.5484	10.0865	6.69887	10.2403	8.08379	17.2697	9.27505	2.88647	12.2659	15.5849
ENSMUSG00000015889	Lta4h	383.114	407.147	543.767	468.86	436.241	456.747	475.295	555.426	382.484	375.4	541.407	461.957	325.1	361.155	570.275	518.197
ENSMUSG00000015890	Amdhd1	0.978136	1.07351	0.803649	0.0376473	2.19302	0.0733023	0.261925	0	0.334943	1.51175	0.636383	0.915147	1.21301	1.02229	1.16987	0.108228
ENSMUSG00000015932	Dstn	81.8006	48.9788	49.8084	80.8853	48.1151	53.8222	63.2549	55.4145	48.6505	47.89	49.3971	56.2077	58.9639	48.7243	55.0369	66.8309
ENSMUSG00000015937	Macroh2a1	1883.91	1853.22	2374.52	1988.68	1924.6	2050.87	1085.74	2358.2	1766.03	1935.69	2245.81	1885.73	1522.75	1785.81	2204.12	1886.18
ENSMUSG00000015942	Gtf2ird2	11.075	24.844	28.4135	27.8967	22.2113	18.2706	6.20434	24.8041	31.1916	22.7122	24.6642	31.2183	23.979	26.4443	35.7519	32.9735
ENSMUSG00000015943	Bola1	63.1529	57.6627	43.5042	46.5133	65.8654	68.6659	160.789	49.8713	60.3945	50.5536	53.8346	60.0454	59.2893	54.2868	43.8523	54.4388
ENSMUSG00000015944	Castor2	21.4874	18.0004	12.8941	13.8354	23.2422	14.074	9.47841	15.6824	15.6586	26.4556	15.5484	14.9228	15.2217	19.3183	10.0857	6.16901
ENSMUSG00000015947	Fcgr1	17.5907	0.824301	2.87528	8.56477	1.66819	1.66763	97.5343	5.47304	1.94686	3.0235	0.739581	0.147604	15.8726	9.44118	3.56278	10.3178
ENSMUSG00000015950	Ncf1	80.4911	75.3181	114.029	85.8359	69.6329	81.7504	113.954	83.0779	49.0692	85.9357	113.964	71.7505	59.4373	78.1152	96.8154	75.7417
ENSMUSG00000015957	Wnt11	0	0	0	0	0	0.0183256	0.0163703	0	0	0.035994	0	0	0	0	0	0.306647
ENSMUSG00000015961	Adss	186.051	153.857	133.191	142.834	163.426	178.509	214.827	118.723	176.808	144.228	137.442	133.493	171.773	155.479	130.812	143.601
ENSMUSG00000015962	1700016C15Rik	0	0	0	0.0188237	0	0	0	0	0	0.071988	0	0	0	0	0	0
ENSMUSG00000015966	Il17rb	2.61888	3.69977	5.26837	5.00709	1.4995	1.53935	0	3.50836	4.12399	5.09315	3.8011	1.91886	3.81653	2.14982	5.31758	6.638
ENSMUSG00000015968	Cacna1d	0.96236	0.0575094	1.58944	1.58119	0.0374874	1.59432	4.82924	0.666588	1.1095	1.51175	0.77398	0.369011	2.855	0.375843	0.957164	0.992092
ENSMUSG00000015970	Chdh	21.235	18.9781	50.2013	75.4076	17.3567	26.4071	0	41.4512	14.8003	21.3085	42.9129	46.5101	8.34311	21.859	89.9025	59.9223
ENSMUSG00000015971	Actr8	59.477	60.3082	63.399	65.6758	59.2114	61.8671	55.3644	80.1484	54.3027	59.5701	78.4643	81.6695	72.3661	68.5688	61.5421	52.4005
ENSMUSG00000015980	Lrrc27	5.44285	3.18219	2.00019	3.21885	3.54256	2.05246	9.60937	3.43819	3.99839	4.7872	3.45711	3.38014	2.27808	1.77398	1.45347	2.52532
ENSMUSG00000015981	Stk32c	0.56795	0	0	0.225884	0.0749749	0	1.14592	0	0	0	0	0	0	0	0	0
ENSMUSG00000015994	Fnta	138.99	146.189	118.601	127.455	123.184	128.352	237.861	132.581	166.634	142.914	147.675	171.62	176.359	137.754	121.737	135.411
ENSMUSG00000016018	Mtrex	148.661	152.553	147.693	157.949	122.209	163.372	67.7567	148.246	141.974	146.064	177.706	151.782	181.596	135.709	151.321	170.928
ENSMUSG00000016024	Lbp	43.4955	50.8958	70.8997	56.5839	74.2626	68.0428	37.177	61.8348	58.4267	68.8026	76.0736	60.2373	42.8842	59.744	72.4963	75.3449
ENSMUSG00000016028	Celsr1	1.86161	6.13433	4.67902	6.55063	4.89211	2.34567	8.52893	4.84153	5.02415	2.3756	1.84035	3.04065	0.991114	0.947124	3.20827	5.14084
ENSMUSG00000016087	Fli1	161.061	208.567	159.587	174.684	223.819	142.28	76.3838	151.859	197.763	190.174	158.924	166.557	152.646	194.01	138.115	152.457
ENSMUSG00000016128	Stard13	0.252422	0.92015	0.303601	0.112942	0.0374874	2.49228	2.06266	0.0350836	0.188406	0	0.963175	0	1.71596	0	0	0.18038
ENSMUSG00000016150	Tenm1	0	0	0	0	0	0.109953	0	0	0	0	0	0	0	0	0	0.018038
ENSMUSG00000016179	Camk1g	0.0157764	0	0	0	0	0	0	0	0	0	0	0	0	1.68378	0	0
ENSMUSG00000016181	Utp25	8.36149	9.16316	10.4296	13.3083	8.41593	5.93748	0.589331	12.5424	2.61675	2.64556	11.3689	9.87473	12.0561	8.73459	9.02216	10.1915
ENSMUSG00000016194	Hsd11b1	0.930807	1.39939	4.96477	3.91532	2.02432	3.31693	6.76094	3.42065	0	1.47575	4.66108	1.50556	0.59171	0.601349	7.39143	6.76426
ENSMUSG00000016200	Syt14	0	0.0575094	0	0	0.0749749	0.0549767	0.0163703	1.12267	0.125604	0	0	0	0.0295855	0.0300674	0	0
ENSMUSG00000016206	H2-M3	54.7441	58.7171	37.8965	32.3579	39.2119	39.7482	46.0497	30.9613	39.2721	43.0848	43.1881	32.1482	46.3309	36.3215	36.6204	33.8574
ENSMUSG00000016239	Lonrf3	6.16857	6.74777	6.62564	4.59297	0.449849	1.22781	27.453	7.49034	3.62158	3.88735	2.85512	7.70494	5.39935	2.61587	1.79025	3.39115
ENSMUSG00000016252	Atp5e	239.628	98.3794	97.7952	85.7418	112.35	122.012	144.484	91.6032	115.765	102.997	91.708	99.5296	146.138	99.2677	83.9291	96.8282
ENSMUSG00000016253	Nelfcd	139.684	174.982	180.732	152.66	172.442	155.474	110.074	218.132	145.198	143.58	186.151	167.959	130.028	156.696	157.56	170.459
ENSMUSG00000016255	Tubb1	0.126211	2.08951	1.85732	1.18589	0	2.2907	0.0163703	1.07005	1.33977	2.08765	0.429989	0	0.961528	0.0300674	0	0.450951
ENSMUSG00000016256	Ctsz	452.246	265.636	354.124	345.621	322.804	317.344	1440.5	397.164	215.704	287.952	381.538	235.886	327.6	426.642	362.872	433.183
ENSMUSG00000016257	Prelid3b	74.1964	75.1072	96.5272	84.1982	71.3198	75.0249	123.874	83.7971	69.8985	71.88	110.989	80.8429	74.9548	60.4957	85.9143	85.9693
ENSMUSG00000016262	Sertad4	0.0631056	0.0766792	0	0.112942	0	0	1.01496	0	0.0837359	0	0	0	0.0295855	0	0.0177253	0.0721521
ENSMUSG00000016283	H2-M2	10.0338	0.306717	1.80375	4.72474	1.16211	0.549767	58.1473	2.10501	0.983896	1.67372	0.0515986	0.147604	7.88453	4.87093	1.64845	5.33926
ENSMUSG00000016308	Ube2a	75.5531	60.8066	67.5601	63.1346	62.0417	67.1999	35.4908	61.484	58.9082	69.8284	58.9429	58.5694	78.0613	63.1717	50.907	58.353
ENSMUSG00000016319	Slc25a5	1350.19	1211.59	1157.52	1074.23	1320.85	1510.67	1192.05	1180.44	1329.01	1073.43	1233.64	1063.05	1131.78	1281.7	1046.43	1186.56
ENSMUSG00000016327	Atp1b4	0.078882	0.249207	0.16073	0.338826	0.0374874	0	0.0654812	0.385919	0.439613	0.17997	0.481587	0.0147604	0.42899	0.0451012	0.141802	0.252532
ENSMUSG00000016344	Ppdpf	61.8434	75.1839	59.1843	63.944	71.601	91.2613	78.9703	64.0977	62.2367	78.251	68.6606	73.5069	72.085	77.2884	64.2895	57.0904
ENSMUSG00000016346	Kcnq2	0.157764	0.0191698	0.0535766	0.0376473	0.0749749	0.0366511	0.0163703	0.0701672	0.0837359	0.035994	0	0.0738022	0.0443782	0.0902023	0.0354505	0.0721521
ENSMUSG00000016349	Eef1a2	0.220869	0.0766792	0.142871	0.790594	0.112462	1.5027	2.02992	0.105251	0.20934	0	0.0171995	0.0147604	0.857979	0.556248	0.0354505	0.703483
ENSMUSG00000016356	Col20a1	0.0157764	0	0	0.0752947	0	0.0183256	0.0327406	0.0350836	0.0418679	0	0.0171995	0	0.118342	2.39036	0.0886263	0.108228
ENSMUSG00000016382	Pls3	18.2848	17.4253	20.377	14.4566	25.7351	16.2548	45.6404	30.4876	12.9163	17.2951	18.5067	17.4763	24.9997	21.4982	13.0458	8.73041
ENSMUSG00000016386	Mpped2	1.00969	1.61026	1.35727	3.23767	4.7609	1.85088	0.998588	3.89428	0.544283	1.51175	1.47916	1.66793	0.458575	4.51012	1.93205	1.38893
ENSMUSG00000016409	Nkap	20.178	28.6588	36.3607	48.7156	16.7381	28.3497	15.1753	26.8039	27.3816	24.9259	32.3867	45.4031	26.1832	25.0462	37.2053	41.7039
ENSMUSG00000016427	Ndufa1	90.872	50.5699	50.4156	41.7697	59.0989	61.0242	126.788	57.5546	57.7987	49.9597	54.9526	57.4624	60.7686	55.0685	56.3663	62.7904
ENSMUSG00000016458	Wt1	0.189317	0.172528	0.196448	0.112942	0.224925	0.16493	0.0163703	0.0175418	0.10467	0.107982	0.0515986	0.118083	0.118342	0.150337	0.283604	0.0721521
ENSMUSG00000016477	E2f3	20.1622	20.9334	29.6279	30.739	18.4063	17.9591	8.46345	21.5939	14.4026	25.9337	30.5292	16.207	25.6358	12.914	29.5835	25.1631
ENSMUSG00000016481	Cr1l	102.515	103.21	81.4364	100.481	116.717	110.302	207.035	80.3589	117.628	111.167	85.0862	107.544	93.076	106.92	91.8878	81.1351
ENSMUSG00000016487	Ppfibp1	26.2046	37.707	33.1996	37.3838	31.302	33.151	45.002	23.8042	21.9597	37.0378	34.4679	23.7643	36.9967	37.4189	33.5716	28.9871
ENSMUSG00000016493	Cd46	0.0315528	0.575094	0.32146	0.0188237	0	0	0.163703	0	0	0.035994	0.137596	0.0147604	0.192306	0	0	0.685445
ENSMUSG00000016494	Cd34	1274.95	1330.96	1083.44	1036.58	1403.68	1495.82	398.355	1142.95	1309.65	1258.82	1110.45	1310.73	1329.81	1253.36	1106.48	821.993
ENSMUSG00000016495	Plgrkt	75.4111	56.34	44.7365	45.6097	60.1298	58.312	46.95	48.1347	60.3526	68.8026	47.058	63.5141	77.159	65.3816	38.8183	31.6026
ENSMUSG00000016496	Cd274	21.7241	14.7607	18.5911	19.8401	22.305	17.2444	78.0372	18.2259	26.314	25.5198	19.5903	21.6536	38.3132	26.6698	11.9646	17.064
ENSMUSG00000016498	Pdcd1lg2	0.725714	0.996829	0.357177	1.52472	1.0309	1.53935	7.75952	0.929715	0.0628019	1.42176	1.04917	1.18083	0.680466	3.9689	0.620384	0.162342
ENSMUSG00000016503	Gtf3a	72.4925	51.0108	55.3446	46.1744	52.6136	57.524	29.6466	44.2053	56.1658	46.2163	55.5373	50.894	58.387	44.0789	50.6943	46.2315
ENSMUSG00000016510	Mtif3	17.4487	17.9046	18.2339	15.6989	14.9387	12.5897	13.0471	11.5074	14.7794	18.087	16.1848	15.3508	16.1241	18.7019	17.8493	16.6671
ENSMUSG00000016520	Lnx2	38.1946	26.7035	25.556	41.1674	52.1263	33.7191	13.5055	35.0134	43.417	35.1122	38.8022	37.6096	26.3755	39.5988	42.1507	26.9127
ENSMUSG00000016524	Il19	0.0631056	0	0	0	0	0	0	0	0	0.017997	0	0	0	0	0	0
ENSMUSG00000016526	Dyrk3	42.3596	42.2694	45.2544	37.9862	44.6288	44.6411	3.11036	34.1889	37.7021	51.5074	30.1508	29.0042	44.1859	40.3956	28.9454	48.5945
ENSMUSG00000016528	Mapkapk2	568.029	587.554	620.596	525.801	662.141	552.974	156.729	498.625	497.642	564.296	549.388	455.448	406.667	560.427	643.764	506.291
ENSMUSG00000016529	Il10	0	0	0	0	0.0187437	0.0183256	0	0	0.0418679	0.377937	0	0	0.0887565	0	0	0
ENSMUSG00000016534	Lamp2	384.281	267.112	241.559	277.178	293.414	262.99	596.387	229.587	316.291	289.914	206.911	241.156	325.914	314.385	217.471	201.521
ENSMUSG00000016541	Atxn10	294.877	251.163	230.165	237.517	266.761	276.588	216.497	218.693	250.182	246.289	254.502	282.352	307.304	271.013	231.9	220.695
ENSMUSG00000016552	Foxred2	81.2326	104.61	90.1159	96.1513	105.658	98.7015	6.71182	115.179	112.206	110.016	91.45	89.2563	118.135	113.895	74.6411	78.5556
ENSMUSG00000016554	Eif3d	151.69	148.182	163.355	142.081	154.542	160.385	55.037	161.525	150.306	147.953	169.828	167.974	144.984	157.794	173.832	188.552
ENSMUSG00000016559	H3f3b	924.954	1204.48	1083.46	1074.66	1142.77	1242.18	2981.64	1259.76	1381.2	1118.1	1332.76	1357.74	1347.74	1172.31	913.312	974.342
ENSMUSG00000016619	Nup50	181.081	151.537	220.771	223.851	176.603	150.031	119.094	171.594	175.385	151.319	187.939	210.676	160.856	141.993	155.114	209.115
ENSMUSG00000016624	Phf21b	0	0.479245	0	0.0752947	0	0	0	0.368378	0	0	0.223594	0	0	0	0.0177253	0
ENSMUSG00000016626	Nlrp14	0	0	0	0	0	0	0	0	0	0	0	0	0	0	0	0
ENSMUSG00000016637	Ift27	73.7862	74.513	58.3449	57.2992	75.9308	85.104	94.1292	57.4143	74.0434	67.1828	60.6112	63.4551	70.8129	66.9903	63.6869	46.1232
ENSMUSG00000016664	Pacsin2	103.698	145.844	202.787	157.667	149.744	142.958	170.89	213.133	143.523	131.306	202.886	179.029	130.753	108.634	192.532	190.175
ENSMUSG00000016756	Cmah	2.69776	3.18219	2.71455	1.44942	4.87337	3.39023	0.360147	8.8586	0.0418679	4.13931	1.03197	2.00742	0.207098	1.32297	0.957164	0.829749
ENSMUSG00000016757	Ttll12	77.7303	81.2991	94.5091	83.8218	101.441	85.5987	13.4891	92.8487	80.1771	81.5444	78.4127	72.6213	67.4697	89.3153	77.1935	115.967
ENSMUSG00000016758	Bik	0	0.0383396	0.0714355	0	0	0.32986	0.0654812	0	0.0418679	0.035994	0.137596	0	0.16272	0.0300674	0.0886263	0.288608
ENSMUSG00000016763	Scube1	0.189317	0.0575094	0	0.263531	0.0562312	0.128279	0.589331	0.0175418	0.0418679	0.053991	0	0	0.0887565	0.0751686	0.0354505	0.144304
ENSMUSG00000016831	Tox4	161.361	203.871	172.838	180.086	211.448	181.185	167.239	179.663	218.739	197.733	202.112	222.381	190.605	229.475	176.455	213.679
ENSMUSG00000016833	Mrps18c	41.2237	24.5182	22.7522	21.2143	25.9226	29.8524	95.5207	20.8396	30.2705	23.756	23.9934	35.6169	35.4286	24.6703	19.1256	28.951
ENSMUSG00000016918	Sulf1	0	0	0.0357177	0	0	0	0	0	0.0418679	0.017997	0	0	0.147927	0	0.106352	0
ENSMUSG00000016921	Srsf6	310.448	277.579	326.835	316.181	289.909	286.667	112.66	286.352	344.782	264.646	353.692	373.158	279.435	277.507	334.777	287.797
ENSMUSG00000016933	Plcg1	71.2462	124.623	96.4379	90.8995	113.137	104.914	7.36664	55.3093	118.8	124.917	107.239	86.7913	120.753	141.257	117.075	75.4892
ENSMUSG00000016940	Kctd2	26.599	25.0933	22.9129	25.4872	17.4317	30.3288	30.8253	21.4185	18.6731	26.2936	19.6075	28.7533	14.778	12.929	28.2009	15.7472
ENSMUSG00000016942	Tmprss6	0	0.0191698	0.0178589	0.0752947	0.0187437	0.0183256	0.0327406	0.0175418	0.0837359	0.071988	0	0.0147604	0.0147927	0.0601349	0.0177253	0.018038
ENSMUSG00000016946	Kctd5	46.351	55.6307	78.4004	65.7134	56.606	45.2458	62.1253	52.8183	50.8695	46.4503	75.1276	49.2408	53.2539	58.8871	60.5672	58.2268
ENSMUSG00000016982	Pom121l2	0.0315528	0.0191698	0.0178589	0.0941183	0.112462	0.16493	0	0.0175418	0.167472	0.125979	0.0171995	0.0147604	0.059171	0.0751686	0.0177253	0.018038
ENSMUSG00000016984	Etaa1	20.2411	23.9814	42.6291	35.7838	19.3623	15.3752	44.0689	40.311	27.6119	25.5378	40.0577	35.7793	29.9997	27.4666	26.9601	37.1403
ENSMUSG00000016995	Matn4	0.0631056	7.05448	0	0.150589	0	0	0	0.0175418	0.481481	1.2058	2.92392	0	0.0443782	0.0601349	0	0.18038
ENSMUSG00000016998	Svs4	0	0	0	0	0	0	0	0	0	0	0	0	0.0147927	0	0	0
ENSMUSG00000017000	Svs6	0	0	0	0	0	0	0	0	0	0	0	0	0	0	0	0
ENSMUSG00000017002	Slpi	34.4556	22.3328	52.0407	41.4874	41.7048	43.5232	8.23426	38.4165	20.4106	20.8225	44.3232	23.0263	8.19518	34.0363	45.3058	48.4862
ENSMUSG00000017003	Svs3a	0.283975	0.191698	0.16073	0.244708	0.281156	0.0916279	0.0163703	0.175418	0.146538	0.197967	0.154796	0.295209	0.207098	0.360809	0.248154	0.198418
ENSMUSG00000017004	Svs5	0	0	0	0	0	0	0	0	0	0	0	0	0	0	0	0
ENSMUSG00000017007	Rbpjl	0	0.134189	0.0178589	0.0376473	0.0187437	0	0	0.0350836	0.020934	0.161973	0.0171995	0.0590417	0	0	0	0
ENSMUSG00000017009	Sdc4	2.31913	3.22052	0.696496	0.734123	1.14337	4.0866	5.10753	2.61373	2.38647	3.56341	0.619184	0.900386	2.42601	2.61587	0.194978	0.487027
ENSMUSG00000017049	Ccdc70	0	0	0	0	0	0	0.261925	0	0	0	0	0	0.0295855	0	0	0
ENSMUSG00000017057	Il13ra1	3.88099	0.191698	0.410754	1.44942	0.824724	0.403163	19.9227	0.912173	0.251208	1.63773	0.0343991	0.0295209	2.97334	2.51063	2.07386	1.33481
ENSMUSG00000017064	Prl5a1	0	0	0	0	0	0	0	0	0	0	0	0	0	0	0	0
ENSMUSG00000017119	Nbr1	97.3719	118.009	105.582	116.198	104.084	96.2092	86.337	111.303	103.225	110.07	98.519	101.906	129.984	111.851	129.767	89.3965
ENSMUSG00000017132	Cyth1	51.2733	70.3915	76.8824	89.8642	71.4885	59.1916	28.4516	96.4798	60.3736	54.045	78.8599	58.6284	62.6029	75.9203	65.0163	56.0442
ENSMUSG00000017144	Rnd3	2.24025	3.20136	1.01796	1.48707	1.57447	0.769674	9.70759	1.3858	0.962962	1.54774	0.361191	0.738022	2.4408	2.24002	0.460857	0.775635
ENSMUSG00000017146	Brca1	22.5445	40.87	84.8475	64.151	16.0634	20.4513	20.643	34.2767	38.5394	36.7499	62.4688	65.9053	46.109	31.8414	65.7253	78.6999
ENSMUSG00000017165	Gast	0	0	0	0	0	0	0	0	0	0	0	0	0	0	0.0177253	0
ENSMUSG00000017167	Cntnap1	0.236646	0.0575094	0.0535766	0.112942	0.0187437	0.183256	0.589331	0	0.502415	0.215964	0.137596	0.0590417	0.0887565	0.0300674	0.0177253	0.0360761
ENSMUSG00000017176	Nt5c3b	92.8441	120.405	89.8658	88.2453	88.9577	118.035	127.999	110.355	91.0418	81.8324	101.529	107.633	116.863	91.5403	65.6721	83.8227
ENSMUSG00000017188	Coa3	113.622	96.4624	86.0798	84.6688	87.9643	106.178	334.756	106.233	98.264	92.7206	106.723	108.105	119.792	104.965	91.6928	93.906
ENSMUSG00000017195	Zpbp2	0.0157764	0.594264	0	0.0188237	0	0.824651	0	0.912173	0.020934	0.017997	0.240794	0	0.769223	0	0.0177253	1.02817
ENSMUSG00000017204	Gsdma	0	0	0	0.0188237	0	0	0	0	0	0	0	0	0	0	0	0
ENSMUSG00000017210	Med24	137.018	190.241	176.571	218.354	151.805	165.755	35.6218	160.385	162.259	159.112	193.495	192.875	165.25	189.996	205.205	202.405
ENSMUSG00000017211	Gsdma2	0	0	0	0	0	0	0	0	0.020934	0	0	0	0	0	0	0
ENSMUSG00000017221	Psmd3	291.437	287.125	328.71	293.066	330.733	331.015	87.1064	313.244	312.146	272.295	376.928	339.431	287.778	302.298	343.64	342.614
ENSMUSG00000017264	Exosc10	117.802	153.493	192.661	184.999	161.046	165.333	87.7612	161.156	175.992	115.991	210.144	198.144	167.291	162.755	194.127	188.191
ENSMUSG00000017286	Glod4	164.721	140.476	119.708	121.864	127.214	151.681	245.031	95.48	119.219	127.815	129.874	142.601	146.138	124.705	113.087	115.804
ENSMUSG00000017288	Vps53	63.1056	56.225	60.7737	58.9934	52.6511	63.0033	22.3127	79.2363	64.3929	56.4206	73.7001	80.2229	57.026	53.054	74.003	64.4499
ENSMUSG00000017291	Taok1	7.85664	10.0833	20.3948	17.2613	8.62211	10.2257	18.3511	16.77	7.22222	17.781	9.66615	14.2291	16.2572	10.9896	15.5982	10.8769
ENSMUSG00000017299	Dnttip1	58.7671	51.9885	53.148	51.5957	51.2078	59.8696	56.8868	70.0093	58.971	52.8752	52.0802	56.1782	64.6295	42.9814	48.6204	56.1704
ENSMUSG00000017300	Tnnc2	0	0	0	0	0	0	0	0	0	0	0	0	0	0	0	0
ENSMUSG00000017307	Acot8	25.1949	25.3041	20.2341	26.3155	25.454	23.1452	14.8151	27.7336	17.6892	20.8765	23.8386	23.8824	17.2927	26.5796	21.164	27.3637
ENSMUSG00000017309	Cd300lg	0	0.728452	0.32146	0.056471	0.131206	3.8667	0.0163703	1.35072	0.837359	0.035994	0.37839	2.59784	0.133135	0	0.0177253	0.541141
ENSMUSG00000017310	Spint4	0	0	0	0	0	0	0	0	0	0	0	0	0	0	0	0
ENSMUSG00000017311	Pyy	0	0	0	0	0	0	0	0	0.314009	0	0	0	0	0	0	0
ENSMUSG00000017314	Mpp2	0.157764	1.72528	2.35737	0.112942	1.29332	0.256558	0.0327406	1.99976	1.98873	0.305949	3.6979	3.85247	1.13904	1.44324	0.159527	2.47121
ENSMUSG00000017316	Ppy	0	0	0	0	0	0	0	0	0	0	0	0	0	0	0	0
ENSMUSG00000017344	Vtn	0.0157764	0.0191698	0.0178589	0.0376473	0	0	0.0163703	0.0350836	0.020934	0	0.0343991	0.0147604	0	0	0	0
ENSMUSG00000017376	Nlk	2.8082	7.09282	7.28642	2.82355	6.07296	0.934604	2.94665	4.10478	7.24315	7.00083	4.17949	4.79714	5.82834	2.42043	12.6558	0.992092
ENSMUSG00000017386	Traf4	33.7615	33.873	27.6455	38.5132	37.7498	33.7924	1.83347	27.3126	26.0837	30.3969	31.5612	31.2035	29.5707	29.5864	22.7061	21.1406
ENSMUSG00000017390	Aldoc	17.5749	27.0102	9.59021	11.8213	24.2169	20.378	22.5255	12.6125	21.541	34.5363	12.2117	19.6019	29.053	21.3779	10.8479	6.24116
ENSMUSG00000017400	Stac2	3.81789	0.0766792	0.571484	2.10825	0.65603	0.311535	23.1476	0.578879	0.544283	0.377937	0	0	3.4615	2.27009	0.850813	1.8038
ENSMUSG00000017404	Rpl19	325.846	209.411	225.79	201.714	235.327	272.465	231.132	203.608	227.427	240.476	209.938	226.469	263.089	210.863	214.653	221.345
ENSMUSG00000017405	Nek8	19.6101	25.4	11.1082	11.746	13.6267	23.4934	2.47192	9.87603	21.227	8.11665	9.76934	5.41708	5.66562	15.7704	14.8715	3.51742
ENSMUSG00000017412	Cacnb4	0	0.306717	0	0.0376473	0.0562312	0.0366511	0	0.0350836	0.334943	0	0.0171995	0	0.236684	0.0150337	0	0
ENSMUSG00000017417	Plxdc1	7.58844	0.90098	4.92905	2.56002	1.72442	2.91377	25.2594	8.08677	0.230274	0.629895	0.619184	0.0885626	3.68339	3.11198	1.59527	9.488
ENSMUSG00000017418	Arl5b	7.91975	5.44422	14.2157	10.6165	10.2153	8.79627	5.15665	5.80633	6.84541	13.9477	5.76185	8.56105	14.4377	10.7491	7.17873	7.72028
ENSMUSG00000017421	Zfp207	321.491	353.203	368.178	348.464	341.754	299.568	497.182	341.1	330.108	358.014	328.494	313.851	334.02	330.727	316.148	306.358
ENSMUSG00000017428	Psmd11	137.586	134.917	108.439	130.128	128.319	138.944	260.599	141.176	125.164	109.872	146.11	121.198	147.558	130.538	126.133	128.088
ENSMUSG00000017446	C1qtnf1	0.0157764	0.325886	0	0.0188237	0	0	0	0	0.020934	0.017997	0	0	0.0147927	0.0150337	0.0177253	0
ENSMUSG00000017453	Pipox	0	0.0191698	0	0	0	0	0.0163703	0	0.020934	0	0.447188	0.0147604	0	0	0	1.06424
ENSMUSG00000017466	Timp2	116.588	86.82	63.0418	91.8407	83.8032	79.4414	304.308	72.6406	90.1207	85.7917	59.5104	65.6249	131.67	81.8285	64.1832	65.9651
ENSMUSG00000017478	Zc3h18	68.438	106.047	121.708	134.552	91.0195	71.2315	30.989	105.672	90.7697	95.978	125.901	132.003	111.404	106.754	150.434	132.002
ENSMUSG00000017485	Top2b	133.105	191.161	267.615	296.077	175.479	135.206	57.1487	202.994	188.196	192.118	219.088	257.953	201.936	148.834	255.953	254.282
ENSMUSG00000017491	Rarb	0.0315528	0.95849	0	0.0376473	0.449849	0.146605	0.52385	0	0.020934	0	0.0859977	0.0147604	1.16863	0.150337	0	0
ENSMUSG00000017493	Igfbp4	807.515	802.371	851.868	723.318	878.78	865.443	80.8366	816.763	782.365	886.334	761.699	673.4	654.416	775.92	852.798	726.897
ENSMUSG00000017499	Cdc6	118.071	116.993	115.618	105.093	113.193	107.315	100.514	99.2339	121.459	110.268	141.294	138.955	119.392	96.6518	121.365	120.638
ENSMUSG00000017548	Suz12	52.3145	72.366	120.405	136.735	56.681	60.9692	62.3054	119.547	90.2463	82.9842	89.472	89.5811	118.682	85.0157	116.615	114.397
ENSMUSG00000017550	Atad5	12.0374	25.9942	48.219	57.7322	11.9397	8.33813	15.4699	28.5931	34.8132	26.9775	47.488	50.894	28.8015	25.9783	40.9454	49.334
ENSMUSG00000017561	Crlf3	215.474	271.444	248.22	239.343	249.01	204.898	127.95	246.252	275.721	285.9	229.115	257.156	260.145	240.855	225.678	153.197
ENSMUSG00000017588	Krt27	0	0	0	0	0	0	0	0	0	0	0	0	0.0147927	0	0	0
ENSMUSG00000017607	Tns4	2.28758	0.0191698	0.0714355	0.112942	1.96809	0.109953	4.32176	0.122793	0	0.035994	0.636383	0	0.443782	1.51841	0.868538	0.360761
ENSMUSG00000017615	Tnfaip1	25.2896	29.9049	34.5391	33.3932	26.8785	18.3622	48.5543	32.1366	25.8953	30.091	37.753	23.2034	21.8193	34.8331	33.7844	25.3975
ENSMUSG00000017631	Abr	102.894	134.169	127.441	154.825	117.673	131.834	155.403	152.543	88.9693	134.258	118.539	95.8985	102.529	144.008	129.306	131.912
ENSMUSG00000017639	Rab11fip4	4.22807	4.86913	3.19674	2.54119	3.18643	1.41107	0.425628	0	2.1562	4.96717	6.48423	5.28423	2.76624	0.541214	0.124077	4.34717
ENSMUSG00000017652	Cd40	0.473292	0.575094	0.0357177	0.244708	0.0562312	0.0733023	5.45131	0.245585	0.565217	0.161973	0	0.0590417	0.414197	0.12027	0.070901	0.360761
ENSMUSG00000017664	Slc35c2	251.271	271.617	237.523	225.131	248.767	277.962	70.5887	225.658	250.266	232.341	254.278	253.599	202.927	237.157	226.263	230.67
ENSMUSG00000017667	Zfp334	0.378633	0	0	0.225884	0	0.0366511	0.589331	0.0701672	0.125604	0.035994	0.808379	0	0.118342	0.420944	0	0.0721521
ENSMUSG00000017670	Elmo2	126.385	184.337	228.826	184.095	174.242	141.015	63.3694	210.694	163.725	147.377	200.065	162.97	184.85	164.544	175.427	205.507
ENSMUSG00000017677	Wsb1	141.057	149.448	140.603	122.523	131.937	149.408	178.125	144.965	124.306	134.582	121.635	108.578	128.519	94.9229	126.541	97.0626
ENSMUSG00000017679	Ttpal	54.9176	56.1483	49.8798	59.0687	50.4581	48.4162	33.9029	41.1004	39.942	81.0225	50.9967	45.7426	52.7805	64.8705	48.4077	44.6441
ENSMUSG00000017686	Rhot1	82.1634	94.3154	102.671	92.7442	75.4247	75.8312	167.092	70.9565	84.636	94.9702	103.644	123.884	81.4193	83.5724	95.0429	73.3066
ENSMUSG00000017688	Hnf4g	0	0	0	0	0	0	0	0	0	0	0	0	0	0	0	0
ENSMUSG00000017692	Rhbdl3	13.1733	7.53373	9.21518	7.98123	3.14894	4.96623	0	16.0683	4.33333	3.07749	9.39095	9.28431	9.21588	1.72888	6.84195	4.13071
ENSMUSG00000017697	Ada	54.397	53.5987	59.6665	54.3627	53.2884	56.2229	41.1713	61.5015	52.1046	57.0865	65.6679	66.9976	69.1561	54.1815	29.3708	44.8065
ENSMUSG00000017707	Serinc3	3241.05	3397.17	2835.04	2786.34	3518.44	3294.46	891.101	2826.4	3593.8	3731.55	2893.55	3590.27	3177.96	3193.34	2970.95	2658.14
ENSMUSG00000017713	Tha1	6.56298	15.7001	17.8767	18.6919	19.2498	15.3752	2.14451	19.4363	22.504	15.9813	18.2659	30.5689	9.9851	16.2515	21.5539	15.8554
ENSMUSG00000017715	Pgs1	53.6713	59.0621	78.6862	85.7418	51.0017	47.2616	71.309	103.549	53.3188	63.5834	88.0101	82.9093	52.2628	56.181	80.1182	67.823
ENSMUSG00000017716	Birc5	119.853	104.399	118.672	119.003	103.953	113.728	243.639	123.301	106.282	89.1212	158.184	158.261	110.901	87.0302	98.0916	141.977
ENSMUSG00000017718	Afmid	1.54609	0.287547	1.44657	0.0752947	0.224925	0.641395	0	1.84189	1.84219	1.65572	1.85755	1.75649	0.91715	0.0300674	0.0177253	0.468989
ENSMUSG00000017720	Trp53tg5	0	0	0	0	0.0374874	0	0	0	0	0	0	0	0	0	0	0
ENSMUSG00000017721	Pigt	40.7189	25.8409	29.8779	28.6496	31.4332	35.6066	26.88	35.6449	27.5282	31.8547	20.4675	27.5577	29.8813	33.3598	38.8361	41.4514
ENSMUSG00000017723	Wfdc2	2.50845	0.728452	0.392895	0.92236	0.543568	0.714697	3.96161	0.315752	0.523349	1.58374	0.75678	0.664219	1.27218	1.27787	0.496307	0.505065
ENSMUSG00000017724	Etv4	0.236646	0	0	0.112942	0	0	0.0654812	0	1.1723	1.96167	0.791179	0.0147604	0.236684	1.1576	0	1.49716
ENSMUSG00000017733	Eppin	0.0157764	0	0	0.131766	0	0	0	0	0	0	0	0	0	0	0	0
ENSMUSG00000017734	Dbndd2	0	0	0	0.0376473	0	0	0	0.0701672	0	0.071988	0	0	0.281062	0	0	0.0721521
ENSMUSG00000017737	Mmp9	59.6821	2.28121	8.42939	22.306	4.85462	5.24111	338.44	12.367	7.7665	9.75438	0.326791	0.944668	50.6208	31.9016	11.1492	31.1878
ENSMUSG00000017740	Slc12a5	0.126211	0.0766792	0.285742	0.0188237	0	0.109953	0.965848	0.0350836	0.376811	0.017997	0.103197	0	0.147927	0.0902023	0.0354505	0.306647
ENSMUSG00000017747	Ghdc	5.4113	4.54324	4.62545	5.91063	5.71683	3.11535	8.72537	6.26242	1.52818	2.05166	3.9215	6.90788	1.16863	1.30793	1.86115	2.39906
ENSMUSG00000017754	Pltp	17.6065	1.26521	1.87518	5.2518	1.31206	1.17284	82.8828	3.71886	1.75845	2.53758	0.154796	0.147604	11.494	8.04304	2.81832	7.28736
ENSMUSG00000017756	Slc12a7	53.198	71.3883	57.5413	68.8005	53.1572	68.556	41.777	46.1875	58.8663	44.6686	49.2079	36.5173	66.2715	51.8212	50.3043	50.1638
ENSMUSG00000017760	Ctsa	434.04	241.444	248.971	298.524	286.179	277.852	1353.86	305.701	245.681	260.849	254.794	234.957	366.919	372.566	278.818	363.106
ENSMUSG00000017764	Zswim1	35.0867	47.081	35.5034	27.3696	53.101	49.6256	8.44708	54.1515	32.8035	50.5356	39.8514	52.2224	28.5796	45.0711	45.8021	42.8403
ENSMUSG00000017765	Slc12a4	22.0869	22.4287	30.2351	38.6262	19.5122	18.069	59.2278	26.225	18.0241	11.3201	19.8827	12.753	27.411	32.7434	17.743	30.1776
ENSMUSG00000017767	Spata25	0.0157764	0	0	0	0	0	0.0327406	0	0	0	0.326791	0.0147604	0	0	0.0531758	0
ENSMUSG00000017774	Myo1c	195.454	185.583	187.215	188.387	185.657	132.97	136.201	200.485	201.908	176.659	180.578	143.383	186.921	202.414	151.498	141.887
ENSMUSG00000017776	Crk	139.984	131.332	121.869	94.0242	125.302	98.0418	96.0937	96.5676	96.1497	130.262	90.16	118.083	109.082	80.2199	91.1433	81.9287
ENSMUSG00000017778	Cox7c	83.4098	55.4199	56.5055	53.8921	59.605	63.1866	263.873	54.8532	60.562	55.1968	55.7953	65.6249	77.2329	56.0307	58.1566	58.1366
ENSMUSG00000017781	Pitpna	359.307	328.474	398.878	357.198	314.426	286.264	622.923	458.876	300.591	290.814	425.293	403.772	359.996	322.263	343.392	336.986
ENSMUSG00000017801	Mlx	48.2758	31.8219	47.5225	30.8143	31.7706	41.6723	44.1507	28.0669	29.7262	25.6457	38.9742	36.2073	35.118	31.6309	34.582	24.9105
ENSMUSG00000017802	Retreg3	41.8863	20.7992	24.8417	32.452	31.2458	26.6087	39.4688	24.3655	27.5072	35.4181	23.2194	33.0486	21.0353	19.2131	21.6071	21.8441
ENSMUSG00000017817	Jph2	0.110435	1.16936	0.0714355	0.0752947	0.0374874	0.0733023	0.0327406	0.0526254	0.020934	0.071988	0.567585	0.369011	0.059171	0.135303	0.0354505	0.018038
ENSMUSG00000017830	Dhx58	29.7858	27.5087	19.0376	23.3225	26.0538	39.8398	42.7429	29.7333	28.4911	24.026	27.5881	22.7458	37.3073	33.1043	22.5288	29.6365
ENSMUSG00000017831	Rab5a	37.3427	36.1734	45.7008	46.5886	40.5614	31.465	119.929	41.6267	32.8873	38.8735	43.6009	41.7277	49.8811	41.3427	41.9025	37.5371
ENSMUSG00000017832	Hspb9	0.473292	0.210868	0.267883	0	1.3308	0.0183256	0.0327406	0	0.020934	0.323946	0.343991	0	0.0147927	0.24054	0	0.018038
ENSMUSG00000017837	Nkiras2	46.8401	49.4581	33.6283	31.492	43.5604	26.7553	45.755	47.0822	29.9356	42.5629	47.4708	27.3068	42.1149	56.166	53.9025	39.8821
ENSMUSG00000017843	Ppp2r5c	157.874	194.573	199.323	201.263	171.055	170.043	226.974	192.556	186.71	190.678	184.035	186.188	181.936	187.651	160.538	170.586
ENSMUSG00000017858	Ift52	130.976	110.801	104.76	83.1818	94.5433	129.488	25.2103	85.7794	106.91	112.085	90.9684	98.8211	107.972	100.41	80.6145	89.4145
ENSMUSG00000017861	Mybl2	77.0361	92.2259	129.602	128.133	97.4298	111.639	1.45696	166.84	101.195	91.4248	139.11	128.239	51.3752	117.894	129.377	131.317
ENSMUSG00000017868	Sgk2	0.078882	0.210868	0.142871	0.056471	0	0.0549767	0	0	0	0.017997	0.0171995	0	0.0147927	0	0	0.018038
ENSMUSG00000017897	Eya2	44.8996	65.1006	29.3243	37.7414	82.135	73.8521	0.883996	68.8164	95.8566	84.334	56.1565	76.4	74.9992	99.8089	36.2127	35.7694
ENSMUSG00000017922	Prl3c1	0	0	0	0	0	0	0	0	0	0	0	0	0	0	0	0
ENSMUSG00000017929	B4galt5	31.1899	21.451	23.788	21.6472	28.5467	35.2034	53.0234	30.663	22.3993	34.3383	22.669	9.99281	31.0944	28.2183	19.675	33.208
ENSMUSG00000017943	Gdap1l1	0.899254	0.0191698	0	0.0376473	0.0187437	0.0366511	0.622072	0.0526254	0.711755	0.035994	0	0	0.133135	0	0	0.162342
ENSMUSG00000017950	Hnf4a	15.1453	35.9242	15.5015	26.4284	22.0051	37.5857	0	13.6651	26.942	24.6739	9.71774	22.0078	35.1771	45.3718	2.90694	7.77439
ENSMUSG00000017969	Ptgis	2.39801	3.02883	1.98233	2.65414	2.36171	2.85879	0	2.06993	2.74235	2.87952	2.88952	0.811824	1.80471	2.11975	2.33973	2.20064
ENSMUSG00000017978	Cadps2	60.4236	20.7225	10.2867	28.9131	26.11	27.5983	12.4578	16.8927	20.3478	34.2483	3.9559	3.63107	58.8012	36.1862	13.2408	31.5846
ENSMUSG00000017999	Ddx27	101.742	130.546	186.804	169.733	140.672	94.1201	25.112	167.068	175.72	126.231	196.075	186.026	126.522	140.671	145.826	156.354
ENSMUSG00000018001	Cyth3	40.072	26.0709	38.2537	57.4875	42.4733	32.0697	42.1699	44.3281	37.5137	35.2021	38.613	29.388	50.3693	31.676	20.4727	69.3202
ENSMUSG00000018008	Cyth4	134.92	142.681	121.387	138.448	143.033	122.085	322.839	134.879	109.924	133.304	138.456	102.939	164.954	168.799	93.7666	121.161
ENSMUSG00000018012	Rac3	0.678385	0.268377	0.214306	1.24236	0.0749749	0.274884	4.91109	0.228043	0.0628019	0.17997	0.275193	0.0147604	0.488161	1.41317	0.0354505	0.613293
ENSMUSG00000018040	Rrp7a	87.4801	97.996	91.3838	91.5207	90.0073	98.4633	134.744	103.023	85.578	95.4021	112.967	99.9724	105.28	84.0535	82.4579	79.8002
ENSMUSG00000018042	Cyb5r3	142.761	199.174	176.946	185.997	174.766	188.35	266.083	229.85	161.233	166.544	215.889	209.229	176.285	169.671	180.532	204.66
ENSMUSG00000018068	Ints2	68.1225	66.4808	76.311	57.8639	56.3061	71.598	13.3091	77.3242	73.1851	50.5536	83.0222	77.817	60.4284	72.1468	80.5613	60.247
ENSMUSG00000018076	Med13l	46.3195	72.5577	50.3977	69.4781	42.3983	50.0471	19.3333	63.5364	37.0322	70.3323	42.9129	44.6208	55.5763	52.9187	65.5657	77.3832
ENSMUSG00000018102	H2bc4	22.3236	23.9431	22.3593	27.7649	20.7306	26.5171	51.7793	35.066	19.8035	24.5839	21.1038	21.4912	16.2128	23.2271	21.0399	15.7292
ENSMUSG00000018126	Baiap2l2	0.709938	0.134189	0	1.8259	1.4995	1.70428	0.0163703	1.35072	1.38164	0.773871	0.103197	1.62365	2.15974	1.50337	1.34712	0
ENSMUSG00000018143	Mafk	95.6996	112.661	107.975	102.532	104.009	129.03	40.3037	113.074	99.9597	94.3583	96.6615	106.334	96.7446	102.801	100.609	77.0404
ENSMUSG00000018160	Med1	60.3447	58.9471	68.8995	63.4169	69.333	64.3044	117.031	66.7114	47.3108	56.8705	54.7634	58.1413	51.7302	43.0115	72.3013	61.1489
ENSMUSG00000018166	Erbb3	2.76087	7.3612	16.3587	18.5225	7.74116	19.59	1.57155	5.4555	12.2464	17.3131	11.6097	5.03331	14.8223	8.01297	8.22452	9.21743
ENSMUSG00000018167	Stard3	65.5982	64.698	60.2915	58.6169	72.1633	58.202	68.0677	65.1327	62.2367	99.9734	77.914	46.643	66.1975	74.7326	51.7755	54.4388
ENSMUSG00000018168	Ikzf3	0	0	0.0178589	0.131766	1.27457	0.201581	0	0.0701672	0.753623	0.053991	0.0343991	0	0.0295855	0.165371	1.13442	0.018038
ENSMUSG00000018169	Mfng	171.316	182.113	128.334	143.135	152.893	192.272	4.10895	155.21	193.514	205.472	153.867	168.889	192.232	196.401	106.334	95.5655
ENSMUSG00000018171	Vmp1	129.682	116.361	77.3825	80.8288	110.007	123.624	269.881	107.251	125.96	116.099	101.512	109.05	126.079	122.239	91.5687	96.1607
ENSMUSG00000018189	Uchl5	146.373	132.195	162.998	151.003	109.445	117.375	420.357	159.964	143.377	134.492	197.571	182.291	169.614	123.712	161.725	159.492
ENSMUSG00000018196	Glrx2	50.1216	38.8763	39.3967	30.9837	34.8821	33.5541	44.6582	31.277	39.2721	35.3821	33.8659	38.8642	43.535	37.8549	33.5007	31.8732
ENSMUSG00000018199	Ro60	8.88211	17.0036	7.14355	13.873	10.1216	12.8462	15.0116	12.9634	12.1626	15.2075	9.66615	9.12195	13.4762	3.95387	5.61891	6.90857
ENSMUSG00000018209	Stk4	176.885	266.882	239.255	280.247	219.302	196.065	104.361	202.906	231.739	241.484	226.346	278.426	182.247	246.147	277.347	243.766
ENSMUSG00000018211	Wfdc15b	0	0	0	0	0	0	0	0	0	0	0	0	0	0	0	0
ENSMUSG00000018217	Pmp22	37.9738	1.85947	5.71484	18.0707	3.03648	3.97665	249.893	8.82352	3.74718	5.84903	0.137596	0.369011	31.2275	21.7538	7.67504	22.9263
ENSMUSG00000018238	Gdf9	0.662608	1.72528	0.714355	2.7859	0.768492	0.549767	0	0	1.33977	0.341943	0.326791	0	2.39642	0.150337	0.0177253	0.703483
ENSMUSG00000018239	Zcchc10	16.2339	18.4797	21.5378	26.579	13.6267	17.7025	47.8177	26.7688	17.7939	14.3076	18.8679	19.5871	19.6744	17.7999	18.2216	14.5026
ENSMUSG00000018259	Prl8a2	0	0	0	0	0	0	0	0	0	0	0	0	0	0	0	0
ENSMUSG00000018263	Tbx5	0	0	0	0	0	0	0	0	0	0	0.0171995	0	0	0	0	0
ENSMUSG00000018286	Psmb6	426.594	414.911	308.333	297.583	423.364	504.32	1182.49	408.162	422.489	377.019	375.071	330.619	416.49	436.534	319.976	348.08
ENSMUSG00000018287	Spag7	130.155	102.654	104.849	108.914	110.738	99.6178	94.604	109.426	105.549	96.7159	113.741	118.821	103.623	109.385	102.984	107.362
ENSMUSG00000018293	Pfn1	2465.2	2370.52	1867.48	1807.79	2368.92	2637.65	3491.08	2091.37	2338.22	2105.52	2088.42	2159.76	2218.69	2362.26	1855.14	2149.93
ENSMUSG00000018322	Tomm34	86.5019	108.559	112.047	103.493	90.0261	75.6663	59.2932	103.602	88.132	96.8059	111.384	105.67	94.3481	100.786	109.702	104.765
ENSMUSG00000018326	Ywhab	309.438	287.374	400.503	400.586	233.322	267.26	341.468	397.707	314.261	278.378	421.836	477.662	370.632	306.718	403.87	350.389
ENSMUSG00000018334	Ksr1	3.6759	3.23969	4.05396	1.54354	6.4291	2.52893	1.9317	1.7191	0.90016	2.84353	3.14752	0.664219	2.76624	2.88647	0.67356	5.8804
ENSMUSG00000018339	Gpx3	7.93552	0.613433	4.01825	4.76239	0.937186	2.16242	39.5343	3.87674	2.3446	5.14714	4.83307	3.86723	6.70111	5.90825	6.84195	5.82628
ENSMUSG00000018340	Anxa6	149.245	136.776	153.943	119.926	149.706	123.881	230.363	158.244	106.617	115.613	137.424	125.227	139.496	164.454	129.518	153.251
ENSMUSG00000018341	Il12rb2	8.99254	12.7479	11.3047	14.6072	15.3136	6.04744	26.1106	11.9109	8.52012	9.66439	9.61455	8.8415	8.87565	7.14102	17.6012	10.5342
ENSMUSG00000018347	Zkscan6	30.6693	28.563	27.8063	25.9014	30.571	24.6845	14.6187	21.8571	19.7407	23.972	25.7477	26.244	25.5914	24.6102	14.6233	21.2668
ENSMUSG00000018362	Kpna2	259.348	288.697	313.905	298.976	286.16	273.179	645.17	311.595	279.72	281.797	395.916	383.934	236.137	284.438	291.474	398.929
ENSMUSG00000018363	Smurf2	16.4074	11.8086	27.0205	22.7202	23.5421	5.90083	8.15241	15.8753	23.153	17.2231	20.949	9.60904	25.6062	6.88544	11.8228	23.1969
ENSMUSG00000018372	Cep95	4.03876	8.33886	14.3764	9.33654	5.34196	4.25153	3.71606	8.70073	8.9388	8.3866	11.9365	8.62009	9.12712	7.98291	12.514	12.5905
ENSMUSG00000018377	Vezf1	105.639	152.534	166.909	169.639	119.979	118.237	28.6153	178.716	136.929	174.157	122.736	137.981	137.573	133.935	156.142	137.72
ENSMUSG00000018378	Cuedc1	15.4766	18.8439	13.7156	12.9695	19.2498	10.299	2.57014	19.2083	14.5282	22.4603	13.0373	20.207	21.3607	18.4313	14.0561	13.1678
ENSMUSG00000018379	Srsf1	301.061	293.643	344.212	386.77	292.046	293.796	79.7397	286.142	324.644	304.311	284.584	285.053	290.485	250.702	305.424	324.576
ENSMUSG00000018381	Abi3	7.80931	5.42505	6.76851	5.02592	7.87236	6.32232	4.66554	7.91135	11.0322	10.0423	7.18941	9.01862	8.84606	9.12547	4.44904	5.05065
ENSMUSG00000018387	Shroom1	0.0315528	0.843471	1.87518	1.60001	0.0187437	0.0183256	0	0	0	0	0	0	1.25738	1.05236	0.0177253	0.162342
ENSMUSG00000018395	Kif3a	16.155	11.9619	18.4125	26.899	10.1404	13.1394	17.6308	16.156	9.12721	12.112	21.1898	16.7826	11.0946	11.9217	12.1241	15.8735
ENSMUSG00000018398	Septin8	45.578	45.9308	51.6121	67.0122	44.5538	22.3755	48.1287	47.24	37.9114	37.2718	34.1067	44.2075	37.5736	36.3515	48.9749	71.5749
ENSMUSG00000018401	Mtmr4	81.2642	120.751	116.583	112.98	132.874	104.877	24.3099	123.284	135.15	105.678	102.544	138.084	104.925	122.209	91.1788	101.807
ENSMUSG00000018405	Mrm1	58.0729	67.0176	63.1132	60.6498	52.5012	74.6401	7.84138	75.9735	84.8244	71.2141	60.9724	67.9127	73.6531	68.8845	57.2703	63.0068
ENSMUSG00000018411	Mapt	0.0631056	0	0.0178589	0.150589	0	0.0549767	0.589331	0	0	0.143976	0	0.0147604	0.266269	0	0	0
ENSMUSG00000018412	Kansl1	105.497	110.552	144.514	149.629	123.596	92.7274	25.996	152.754	123.573	126.915	110.885	118.969	113.786	149.24	129.253	115.516
ENSMUSG00000018415	Gid4	100.874	96.3665	126.887	166.288	106.352	121.59	31.5128	159.262	102.807	138.199	137.493	127.84	92.6322	102.695	145.861	120.981
ENSMUSG00000018417	Myo1b	4.51205	0.287547	1.33942	1.20471	1.76191	1.22781	25.7832	2.94702	2.07246	0.251958	2.14994	0.0295209	3.65381	1.77398	0.531758	1.11836
ENSMUSG00000018425	Dhx40	22.718	17.7512	29.9315	29.4026	20.3182	22.1739	38.6667	26.9793	22.1063	22.8562	31.5956	29.8751	18.7572	18.1908	35.681	31.9273
ENSMUSG00000018427	Ypel2	3.81789	2.68377	4.55401	7.7177	6.11045	0.623069	1.88258	5.19237	2.65861	3.09548	1.80595	2.834	3.43192	5.83308	4.44904	4.20286
ENSMUSG00000018428	Akap1	54.9176	55.2473	52.3265	86.5136	51.6764	62.9667	25.0466	77.1663	78.1465	61.4598	69.7786	64.4736	57.9876	54.1515	61.9143	81.586
ENSMUSG00000018433	Nol11	119.159	118.719	116.315	95.6619	110.757	133.758	58.4747	105.602	128.053	116.297	128.79	115.294	120.206	121.593	108.833	94.7718
ENSMUSG00000018442	Derl2	53.8606	42.672	41.3433	36.0473	46.6344	56.7543	104.704	35.1713	65.3977	60.254	45.166	43.3071	57.9728	48.0778	45.483	41.8482
ENSMUSG00000018446	C1qbp	230.351	181.73	255.132	243.446	189.555	200.592	231.312	235.428	200.924	195.088	282.399	259.843	221.048	218.921	229.524	235.342
ENSMUSG00000018449	Rpain	39.0308	34.0264	41.754	27.5767	38.3871	35.6066	48.4397	38.6621	34.5829	33.4024	39.4902	40.3403	39.0972	38.2308	29.743	40.2248
ENSMUSG00000018451	6330403K07Rik	0.0315528	0.0191698	0	0.056471	0	0.0183256	0	0.0526254	0.0418679	0	0	0.0147604	0	0.0300674	0	0.18038
ENSMUSG00000018459	Slc13a3	0.425963	0	0	0.131766	0.0187437	0.0549767	0.458368	0	0.0418679	0.035994	0	0	0.784016	0.0902023	0	0.0721521
ENSMUSG00000018470	Kcnab3	0.0315528	0.364226	0	0.0376473	0	0	0	0.0175418	0	0.701883	0.309592	0.0147604	0	0.0150337	0	0
ENSMUSG00000018474	Chd3	29.3441	29.8665	43.1113	17.2613	22.7361	10.5006	16.0756	46.6085	31.38	30.055	31.5956	31.3364	31.4494	30.744	36.1595	27.2735
ENSMUSG00000018476	Kdm6b	5.09577	5.38671	2.6074	3.5765	2.77407	2.32735	1.34236	2.82423	6.55233	3.67139	3.13032	1.13655	6.02065	1.32297	4.87445	1.44304
ENSMUSG00000018479	1700125H20Rik	0	0	0	0	0	0	0	0	0	0.017997	0	0	0	0	0	0
ENSMUSG00000018481	Appbp2	131.07	142.892	106.439	106.749	135.03	149.885	31.9548	103.9	135.38	141.96	112.485	141.139	122.972	134.837	98.712	112.611
ENSMUSG00000018486	Wnt9b	0.0946583	0.0191698	0.0892944	0	0	0	0	0	0	0	0.0343991	0.0147604	0	0.0601349	0	0.018038
ENSMUSG00000018500	Adora2b	3.70745	3.91064	0.517907	2.01413	4.27357	3.09702	4.38724	3.05227	2.38647	2.32161	2.68313	1.44652	1.56803	3.7885	0.283604	0.613293
ENSMUSG00000018501	Ncor1	76.1369	149.697	241.077	240.943	89.595	61.8488	95.0623	240.884	103.707	106.758	195.817	228.934	158.371	108.513	195.456	214.472
ENSMUSG00000018507	Trpv2	97.6085	107.734	84.3296	84.33	104.552	116.459	141.734	78.1136	88.1948	96.8239	82.5578	82.6289	117.173	102.545	74.6943	103.989
ENSMUSG00000018509	Cenpv	49.8534	41.4067	38.843	38.3814	47.609	45.7406	26.3889	38.1534	41.3655	34.8422	38.1142	27.8234	50.8575	46.5745	33.6071	56.1704
ENSMUSG00000018537	Pcgf2	1.02547	2.10868	1.48229	2.4659	2.90528	1.90586	0.589331	0.98234	0.376811	2.30362	1.70276	1.63841	2.84021	1.98445	0.691285	1.78577
ENSMUSG00000018541	Cwc25	29.2179	32.972	36.6464	26.2214	40.9925	28.313	27.4857	37.8376	27.5072	31.5487	38.7678	42.7905	29.8961	30.8191	39.2615	40.8561
ENSMUSG00000018543	1700001P01Rik	0.0631056	0	0.0178589	0	0	0.109953	0	0	0	0	0	0	0	0	0.0531758	0
ENSMUSG00000018547	Pip4k2b	2.57155	2.43456	1.67873	7.60476	2.62412	4.32483	2.17725	3.17506	2.11433	2.75354	2.54553	2.9078	3.99404	2.4956	4.30724	4.20286
ENSMUSG00000018548	Trim37	118.449	147.837	193.233	166.853	109.595	110.815	74.665	158.227	129.351	121.984	175.986	176.299	130.132	137.333	148.024	168.403
ENSMUSG00000018554	Ybx2	0.0946583	0.191698	0.107153	0.0752947	0.0374874	0.439814	0.0327406	0.0877089	0	0.071988	0.0515986	0.767542	0.0147927	0.962158	0.0531758	0.541141
ENSMUSG00000018559	Ctdnep1	30.196	30.0774	26.6276	34.7485	34.1511	30.7137	25.5868	31.5226	32.5104	39.2515	21.2758	20.1775	27.0559	29.3007	36.0355	31.5666
ENSMUSG00000018565	Elp5	83.8357	80.2831	77.9004	68.8005	84.0468	72.9541	94.0965	79.2538	81.1819	60.362	90.0568	84.0311	89.4369	72.0266	69.6957	86.33
ENSMUSG00000018566	Slc2a4	0.189317	0.306717	0.196448	0.0376473	0.0562312	0	0.753034	0.0701672	0.0837359	0.863856	0.0171995	0.0295209	0.0147927	0.0150337	0.0531758	0
ENSMUSG00000018567	Gabarap	184.678	136.355	127.905	140.613	146.52	148.859	254.067	122.617	130.963	140.377	115.117	113.434	168.356	155.283	131.752	139.38
ENSMUSG00000018569	Cldn7	0.915031	0.613433	0.553625	0.489415	0.0374874	2.08912	2.11177	1.1753	1.48631	1.51175	1.46196	0.162365	1.87868	1.71384	0.283604	1.73165
ENSMUSG00000018570	2810408A11Rik	6.8154	7.01614	6.10773	6.7577	8.39719	7.22027	10.2642	5.59583	10.5926	7.8287	8.59977	6.716	16.701	3.57803	6.32792	2.85001
ENSMUSG00000018572	Phf23	69.7632	66.0016	63.2561	73.2805	72.5194	72.331	81.8351	56.7652	64.6231	90.417	68.7294	74.983	70.5762	70.2826	63.5451	61.1128
ENSMUSG00000018574	Acadvl	79.2921	71.8867	51.6479	57.5063	68.7145	65.8071	65.5631	62.1506	75.2576	65.7431	62.6752	77.9203	72.233	67.2158	57.3058	52.2021
ENSMUSG00000018581	Dnah11	0.315528	0.172528	0.267883	0.112942	1.68693	1.48437	0.491109	0.0175418	0.146538	0.017997	0.103197	0.0295209	0.0147927	2.69104	3.20827	0.27057
ENSMUSG00000018583	G3bp1	767.159	904.297	906.106	996.374	889.408	965.043	227.089	1015.72	1060.54	870.479	1041.83	1056.03	941.603	1002.81	910.99	950.532
ENSMUSG00000018585	Atox1	129.603	69.3946	77.5789	78.2311	73.0818	89.9786	193.972	84.7268	80.8051	79.6008	83.3662	79.3226	96.1381	76.1308	72.5318	84.6344
ENSMUSG00000018589	Glra2	0	0	0	0	0	0	0	0	0	0	0	0	0.0887565	0	0	0
ENSMUSG00000018593	Sparc	0.268199	0.0191698	0	0.112942	1.61196	0.384837	3.33954	2.24535	0.0837359	0	0.980374	0.118083	0.680466	3.54796	0.141802	0.108228
ENSMUSG00000018595	Glra4	0	0	0	0	0	0	0	0	0	0	0	0	0	0	0.0177253	0
ENSMUSG00000018599	Mief2	16.8807	16.8311	7.75075	12.8754	23.0548	23.5667	3.50324	10.7707	18.0241	19.1128	7.03462	10.7456	12.4555	17.1685	10.1034	17.6773
ENSMUSG00000018604	Tbx3	0.252422	0	0	0.112942	0	0	0	0	0	0.053991	0	0	0.0147927	0.0150337	0	0.0360761
ENSMUSG00000018620	Mmp20	0	0	0	0	0	0	0.0491109	0	0	0.017997	0	0	0	0.0451012	0	0
ENSMUSG00000018623	Mmp7	0.0946583	0	0	0	0	0	0	0	0	0	0	0	0	0	0	0
ENSMUSG00000018634	Crhr1	0	0	0	0.225884	0	0	0	0	0	0	0	0	0	0	0	0
ENSMUSG00000018648	Dusp14	0.0946583	0.0383396	0	0	0.0374874	0	0.392887	0	0.0837359	0.071988	0	0	0.0887565	0.195438	0.0531758	0.324685
ENSMUSG00000018651	Tada2a	29.5334	26.416	36.3071	26.3155	19.5122	16.0165	27.9768	56.8705	24.6602	19.3828	45.3552	29.4175	27.3666	28.6994	30.7711	26.6963
ENSMUSG00000018654	Ikzf1	112.391	151.997	153.908	202.354	138.516	118.072	33.1335	153.017	166.676	147.791	93.7203	93.2564	143.283	157.764	177.979	176.592
ENSMUSG00000018656	Tcaf3	0	0	0	0	0.0187437	0	0	0	0	0	0	0.0295209	0	0.0300674	0	0
ENSMUSG00000018659	Pnpo	66.4028	66.2316	57.7377	54.5322	61.2732	72.496	28.779	51.2045	63.8486	57.0865	61.6776	69.1083	62.6769	64.9757	55.1256	47.909
ENSMUSG00000018661	Cog1	93.9326	133.901	113.457	110.043	116.605	143.581	35.2289	93.1118	137.411	129.794	106.156	92.8579	115.028	140.28	123.722	133.878
ENSMUSG00000018666	Cbx1	80.0336	62.3593	61.7203	66.3158	63.7849	63.5531	85.1419	64.7994	65.7536	51.1115	67.577	78.0679	68.2685	61.2925	61.7903	76.0664
ENSMUSG00000018669	Cdk5rap3	153.93	171.627	155.962	119.078	165.994	196.725	167.861	216.676	140.195	142.356	177.603	144.018	177.188	154.051	190.547	159.871
ENSMUSG00000018672	Copz2	15.0507	11.0035	8.12579	8.5083	11.1338	8.59469	42.5137	15.2614	9.9227	11.1042	5.89944	9.0629	10.562	11.2001	2.65879	3.64368
ENSMUSG00000018677	Slc25a39	293.125	298.819	254.864	283.033	311.708	338.18	138.689	331.031	299.418	277.442	298.326	303.15	276.284	312.867	295.533	307.043
ENSMUSG00000018678	Sp2	42.2176	73.6695	73.0071	71.0782	69.2206	61.2257	22.3127	69.5006	55.0145	48.7719	62.6408	76.4295	51.1089	51.3101	77.7076	70.4926
ENSMUSG00000018697	Aatf	62.6165	61.9184	80.1685	88.5277	65.3219	62.5085	94.1784	85.6741	87.6086	72.024	98.3642	94.083	82.4696	83.7679	84.2127	99.4076
ENSMUSG00000018698	Lhx1	0	0	0	0.0376473	0	0.0183256	0	0.0175418	0.0418679	0	0	0	0.0295855	0	0	0
ENSMUSG00000018707	Dync1h1	105.197	101.562	136.906	227.333	96.4177	53.3457	106.194	136.422	123.845	124.683	78.3783	72.4885	89.1855	103.943	184.29	172.949
ENSMUSG00000018727	Cpsf4l	0	0.115019	0	0	0	0	0	0	0.020934	0	0	0	0	0	0	0.018038
ENSMUSG00000018733	Pex12	18.5846	21.8727	24.0559	15.8872	12.8394	18.3622	17.0251	15.7525	16.0564	25.6997	17.6295	26.4064	19.5264	24.0239	26.0916	11.4
ENSMUSG00000018736	Ndel1	61.1966	52.9086	77.3289	71.5487	54.1881	43.8714	86.4188	61.291	49.8856	66.7329	62.4	82.5108	67.2182	56.1509	43.9587	54.529
ENSMUSG00000018740	Slc25a35	4.65404	8.8181	6.08987	3.68944	7.51623	1.42939	2.01355	8.49023	9.96457	7.36078	4.79867	3.79343	6.90821	10.1327	1.18759	3.53545
ENSMUSG00000018750	Zbtb4	3.6759	3.14385	1.0001	5.81651	2.99899	1.94251	7.3339	1.12267	3.49597	3.90535	0.739581	2.39119	2.61832	5.98342	4.14771	1.46108
ENSMUSG00000018752	Tnfsfm13	0.489068	0.249207	0.32146	0.301179	0.224925	0.586418	1.34236	0.280669	0.20934	0.143976	0.120397	0.295209	0.295855	0.180405	0.567208	0.342723
ENSMUSG00000018761	Mpdu1	60.3131	68.9537	60.988	54.3251	62.3791	66.2469	56.2811	57.8528	79.9887	53.4691	58.0313	48.5913	58.0615	60.5107	57.7312	55.3587
ENSMUSG00000018765	Fxr2	51.0524	71.3116	72.8463	96.6595	60.6359	67.3831	37.4225	100.865	73.7922	69.4504	75.5576	78.2598	78.8897	60.9467	69.1817	79.8002
ENSMUSG00000018770	Atp5g3	369.041	263.834	284.867	302.929	301.062	345.877	219.247	275.81	317.819	275.138	281.23	283.887	294.331	287.204	273.908	311.066
ENSMUSG00000018774	Cd68	216.121	46.2567	69.4174	102.57	69.5392	57.6522	1041.54	79.9555	64.3929	66.4089	47.0064	37.0044	166.3	133.95	69.1108	125.418
ENSMUSG00000018776	Slc35g3	0.0473292	0.210868	0.0535766	0.0752947	0.187437	0	0.376517	0.0175418	0.0628019	0.017997	0.343991	0.0590417	0.295855	0.0451012	0.0177253	0.0541141
ENSMUSG00000018796	Acsl1	49.7114	62.1676	78.454	84.9512	47.1592	43.5599	40.6638	47.5207	45.5732	55.3768	58.8053	65.3149	62.9875	49.2805	95.8228	67.0113
[truncated: 53,775 more rows]

## Sheet: Down_1
Gene_Symbol	Fold_Change	Average_Expression	p-Value	Adjusted_ p-Value
Igkc	-12.0474	0.849533	3.5103e-05	0.0182537
Art5	-6.38581	-1.80308	0.00020113	0.0289157
Ddx4	-6.26522	-1.85678	0.000824796	0.0478181
Chad	-6.166	-1.35144	0.000437758	0.0385012
Jchain	-5.94698	0.697299	0.00578172	0.103876
Plod2	-5.79917	0.559176	0.000400806	0.0381325
Nhsl1	-5.79716	-1.07739	2.01688e-05	0.014498
Sox18	-5.6633	-1.79531	0.00221868	0.0687089
Gpr4	-5.53057	-1.59778	0.00019472	0.0286305
Rnf208	-5.52829	-1.64365	0.000674036	0.0461447
Fjx1	-5.4693	-1.08371	0.002463	0.0722709
Pygm	-5.41323	0.319258	4.10838e-05	0.0189851
5830444B04Rik	-5.36143	-1.85719	0.00811896	0.124468
4930452B06Rik	-5.35369	-2.05772	0.00317482	0.0810734
Xist	-5.24654	1.21241	4.27523e-06	0.00991353
Foxa3	-5.16259	-1.32508	0.000619678	0.0452995
Arhgef10	-5.12147	1.27612	1.46378e-05	0.0113924
Zfp879	-5.11957	-0.893897	0.00170971	0.0631923
Pde10a	-5.06143	-0.137089	0.00299602	0.0789066
9630028I04Rik	-4.94725	-1.6745	0.00312463	0.0803768
Abcg3	-4.84854	-0.521229	0.00333912	0.0835684
Arhgef16	-4.8474	-0.481856	0.0132703	0.156256
Kazn	-4.65666	-0.256106	0.00329642	0.0831431
Npr2	-4.58331	0.953453	0.0054421	0.102331
Fam71e1	-4.55851	-1.50929	0.00175071	0.063331
D630039A03Rik	-4.49177	-0.703432	0.0147126	0.162715
Pde9a	-4.42867	-1.19759	0.0073294	0.1172
Pcdhb5	-4.39811	-1.91126	0.00986414	0.137832
C1ql1	-4.34578	-1.15601	0.00419326	0.0948781
P2ry10	-4.30165	-0.829247	0.0315451	0.222946
Fstl1	-4.28886	-0.215344	0.00523167	0.101873
Lrtm2	-4.28166	-1.35322	0.015285	0.16495
Btc	-4.27556	-1.81146	0.0114402	0.146869
Krt7	-4.2292	0.533972	0.0002502	0.0323733
Cryab	-4.22319	0.0604601	0.00317677	0.0810734
Lrrn4	-4.16817	1.26805	0.00614387	0.106705
Bgn	-4.15911	0.296122	0.00750912	0.118924
A130051J06Rik	-4.13146	-1.3119	0.0222269	0.192242
Tns2	-4.12124	-0.335852	0.0103651	0.140942
Il18r1	-4.08942	-0.202725	0.0024592	0.0722709
Obscn	-3.96246	0.0795104	0.000638104	0.0457462
Eps8l1	-3.93623	1.382	0.000554419	0.0427001
Trpc6	-3.893	0.847229	0.00171295	0.0631923
Pim1	-3.85582	5.40446	3.20785e-08	0.000415064
Myo5c	-3.83532	0.237508	0.00224319	0.0687788
Fam169a	-3.80675	0.405146	0.00767842	0.120134
Plscr2	-3.77243	-0.599624	0.00530861	0.102214
Pde1b	-3.75434	-0.0292075	0.0117022	0.148373
Gm5134	-3.61605	0.29805	0.0313406	0.222689
Igsf9	-3.56634	0.476715	0.00257354	0.0735079
Baiap2l2	-3.55491	-1.02726	0.0358425	0.235341
Gimap8	-3.5291	0.689589	0.00249204	0.0729302
Dlk1	-3.52533	-0.528301	0.0131047	0.155847
Apbb1	-3.47892	0.301119	0.00307358	0.0796975
Castor1	-3.41427	0.835373	0.00515926	0.101607
Cd248	-3.41304	-1.90152	0.0324662	0.225365
Slc9b2	-3.41004	-1.56712	0.0123259	0.151314
Mmp17	-3.39989	-1.02628	0.01907	0.179278
Ryr1	-3.39269	-0.28136	0.00134816	0.0596623
Sgsm1	-3.31407	2.44736	2.29685e-05	0.0146572
Tmem44	-3.30683	1.18836	0.0354049	0.23392
Gm12258	-3.29034	-0.147481	0.00882034	0.128718
BC037704	-3.28755	0.452053	0.000440388	0.0385012
Syt3	-3.24624	0.390573	0.0242138	0.200714
Gcnt4	-3.19817	-1.68834	0.0345101	0.231367
Epm2a	-3.1978	-1.45548	0.0058433	0.104238
Gm20467	-3.18396	0.0647534	0.000939745	0.0495134
Arhgef17	-3.14967	-0.620916	0.019238	0.179467
Klf12	-3.11596	0.351188	0.000723015	0.0476148
Gm12185	-3.11097	2.65358	0.00390464	0.0912074
4933406P04Rik	-3.10753	-0.295246	0.0076061	0.119727
AI661453	-3.09191	-0.4683	0.0162443	0.168811
Gpm6b	-3.07095	0.832682	0.00101867	0.051518
Slc16a2	-3.04632	0.55751	0.00562259	0.102834
H3c6	-3.03257	-0.362785	0.000226611	0.0308645
Cd200	-2.97603	1.45898	0.000352525	0.0366879
Cd74	-2.94956	6.80358	6.461e-05	0.0245212
Ephb4	-2.9374	0.578479	0.00763438	0.11988
Tcf15	-2.91694	1.82885	0.0001582	0.0276626
Chrnb1	-2.89997	1.30154	6.19484e-05	0.0244061
Dpm1	-2.87522	-0.410298	0.00426807	0.0953393
H2-Eb1	-2.86091	4.57066	0.000113455	0.0257542
Fzd4	-2.82868	-0.248754	0.0124648	0.152205
Iigp1	-2.82416	2.97872	9.09812e-05	0.0257542
Plekha6	-2.81901	0.55373	0.03584	0.235341
Evpl	-2.80314	1.57655	0.0412346	0.251667
Fcrl1	-2.75762	0.316216	0.0140917	0.160363
Bcam	-2.755	1.97175	0.00264972	0.0742161
H2-Aa	-2.74613	5.33183	0.000128439	0.0266997
Cdcp1	-2.74316	1.20121	0.018172	0.176195
Cnrip1	-2.73276	2.7145	0.000769108	0.0476148
Lhcgr	-2.73256	0.502608	0.000302313	0.0352399
Hoxa10	-2.73029	2.63083	0.000103732	0.0257542
Upp1	-2.70694	1.17733	0.00084124	0.0480583
Trim30b	-2.69171	-0.262961	0.00178873	0.0635836
Trim30b	-2.69171	-0.262961	0.00178873	0.0635836
Agmo	-2.69162	0.533284	0.0193433	0.180319
Prkn	-2.66754	-0.180468	0.0331853	0.226828
Camsap3	-2.63938	1.25681	0.00630908	0.108258
L3hypdh	-2.62888	-0.679794	0.0358893	0.235483
Hnf4a	-2.62646	2.70464	0.00126502	0.0578376
Tcf7	-2.62231	1.36291	0.0441861	0.261794
Ltb	-2.60525	4.87475	4.67616e-06	0.00991353
Thnsl2	-2.59962	2.05433	0.000786504	0.0478181
Cdkn1c	-2.58348	1.15823	0.000136658	0.0268716
Amot	-2.57606	0.729479	0.0445658	0.262668
5830454E08Rik	-2.5755	1.02732	0.000628274	0.0454147
Slc18a1	-2.55215	0.973145	0.00444062	0.0963435
Rfx8	-2.54983	-0.611685	0.0298835	0.218087
2210408F21Rik	-2.53983	0.627041	0.00726883	0.117019
Slc52a3	-2.53714	-0.181978	0.0307326	0.22027
Ccdc149	-2.51682	2.27012	0.0478092	0.270893
Plcl1	-2.5071	-0.176623	0.0298839	0.218087
Tox	-2.50419	2.60966	0.000990496	0.0511995
Ly6a	-2.49831	4.12125	5.7555e-05	0.0244061
Cd276	-2.44815	1.42884	0.00729838	0.117019
Fah	-2.44453	1.67066	0.0391595	0.245885
St3gal6	-2.44068	0.851403	0.0223184	0.192606
Gm9008	-2.44012	2.41356	1.49679e-05	0.0113924
BC016579	-2.42944	0.505227	0.0174584	0.174246
Gm20707	-2.39063	0.914706	0.0302711	0.218781
Phf2os1	-2.38766	-1.40084	0.0190914	0.179278
Cish	-2.38314	1.26885	0.000534759	0.0417805
Bmf	-2.36815	-0.425694	0.000651613	0.0457462
Cyp2r1	-2.36717	0.0719978	0.0154182	0.16495
Abca4	-2.33109	1.8455	0.0498563	0.27627
Cbarp	-2.30814	0.954706	6.82249e-05	0.0245212
Gm35551	-2.30155	0.128279	0.0191942	0.179444
Mlf1	-2.29564	0.237201	0.00471139	0.0977334
Pglyrp2	-2.29483	5.24161	9.22293e-06	0.0101689
Alpk3	-2.28812	1.46182	0.00549469	0.102331
Bcl2l14	-2.27911	-0.144021	0.0109852	0.143652
Nkx2-3	-2.22635	1.94358	0.00225795	0.0690676
Slc27a3	-2.21557	-0.247175	0.0203686	0.184172
D830025C05Rik	-2.21471	-0.222393	0.0144412	0.161718
Grin2d	-2.21075	-0.515457	0.0261159	0.206549
Gcsam	-2.20231	1.40117	0.0110729	0.144129
Apol7e	-2.20032	0.918708	0.000625585	0.0454147
Cerox1	-2.19871	0.737921	0.00237243	0.0710575
Bco2	-2.19641	-0.225769	0.0110904	0.144129
H2ac6	-2.17908	1.83127	0.00117866	0.0566942
Cc2d2a	-2.15561	1.44893	0.00694329	0.113865
Npdc1	-2.14898	2.73889	2.20255e-05	0.0146572
Rhoj	-2.12524	0.381521	0.0129451	0.154802
Wdr35	-2.1166	1.29156	0.0218556	0.189792
Fhl1	-2.11624	1.25263	0.0194103	0.180424
Cyp11a1	-2.10109	1.03868	0.00797204	0.122798
Hbb-bt	-2.09216	0.965699	0.000434015	0.0385012
Socs2	-2.07131	-0.144905	0.0318004	0.223668
Ifi205	-2.047	0.0129805	0.00252641	0.0731302
Ttc39a	-2.04667	-0.506465	0.0257199	0.204405
Zfp979	-2.04611	0.0979222	0.0278021	0.210616
Gm14636	-2.03056	1.57675	0.00835798	0.126059
Scn1b	-2.02786	2.63684	0.000825322	0.0478181
Mttp	-2.02498	0.420822	0.003855	0.0907389
B3gnt3	-2.01545	2.7181	0.00191193	0.0651011
Fgd5	-2.01516	1.54357	0.023835	0.198896
Hmga1b	-2.01326	4.30159	2.44401e-05	0.0146572
Slc16a11	-2.00534	2.59708	0.00174238	0.063331
Dusp4	-2.00468	2.91094	0.00338704	0.0844411
Hid1	-2.00252	1.57453	0.0382198	0.243729
Nradd	-2.00053	1.05833	0.0137605	0.158546
Gm42517	-1.9946	1.3917	0.0038938	0.0912074
Plbd1	-1.99412	2.62629	0.0181368	0.176195
Lax1	-1.99317	2.80661	0.00643351	0.109387
Chst10	-1.98458	1.64635	0.0289158	0.21441
Procr	-1.98233	4.00382	0.000330834	0.0365374
Pald1	-1.97454	1.17934	0.0452167	0.26413
Aspa	-1.96627	1.94267	0.00283799	0.0768216
Smim6	-1.94709	2.24196	0.00295855	0.0787481
H4f16	-1.94456	0.639657	0.0175333	0.174246
Emcn	-1.94285	1.31073	0.00561162	0.102834
Mapre3	-1.9416	0.384963	0.0426218	0.257181
Gm16124	-1.93521	1.13685	0.00529379	0.102202
Rgmb	-1.93459	1.82015	0.00820793	0.124854
Slc16a9	-1.92927	1.01598	0.00476609	0.0978867
H2-T10	-1.9166	3.23361	0.000143406	0.0272871
4833418N02Rik	-1.91559	0.415067	0.0077894	0.120993
Klf5	-1.91074	1.4415	0.0276132	0.210107
Hdac9	-1.89721	2.06826	0.00364142	0.0877399
Jrkl	-1.88779	1.13994	0.0236969	0.198809
Atp6v1g2	-1.88301	1.87801	0.000728409	0.0476148
C920021L13Rik	-1.88259	-0.430188	0.0172922	0.173417
Fzd8	-1.87729	2.15945	0.0266427	0.20817
Mapk12	-1.86182	-7.31039e-05	0.0180974	0.176195
Myl10	-1.84979	2.1046	0.0106086	0.142031
Tymp	-1.84231	1.09616	0.00701568	0.114616
Smim10l2a	-1.83885	2.05033	0.00231275	0.0703377
Zfp933	-1.83408	1.28314	0.0104089	0.141124
Obsl1	-1.82486	2.51329	0.00170903	0.0631923
Il1r2	-1.82125	-0.162698	0.0289492	0.21441
Neu3	-1.82088	2.64263	0.00173826	0.063331
Map3k9	-1.81921	1.12232	0.0198684	0.182195
Gm5111	-1.81744	1.57673	0.00220826	0.0687089
Cabcoco1	-1.80837	1.07851	0.00272543	0.0753512
Irf6	-1.80035	2.7491	0.000880397	0.0490592
Patj	-1.79991	2.84835	0.00425729	0.0953393
Col4a2	-1.79629	4.14503	0.002038	0.0668454
Vldlr	-1.78492	4.26585	0.000806618	0.0478181
Robo4	-1.76812	3.22739	0.000782907	0.0478181
Gm49980	-1.76685	0.775863	0.0018564	0.0647888
Fam181b	-1.76399	0.509969	0.00882072	0.128718
Adora2b	-1.74899	0.945583	0.017218	0.172969
Ldlr	-1.74674	6.47375	0.00107903	0.0528847
F11r	-1.73507	4.86545	0.000104138	0.0257542
Dsel	-1.73252	0.731311	0.0332554	0.226866
Trim34a	-1.71994	3.96803	0.000427034	0.0385012
Gm4285	-1.71405	-0.852816	0.0479472	0.271267
Fcgrt	-1.70295	4.34774	0.000599606	0.0448457
Zfp467	-1.69947	3.84563	0.00076127	0.0476148
Slc24a5	-1.69548	1.57722	0.0232681	0.196775
Rbp1	-1.69375	3.99313	0.000244643	0.031974
Gimap7	-1.69213	2.18513	0.0207234	0.185283
Gm50069	-1.68848	1.72494	0.00871301	0.128111
Pkia	-1.68312	1.1598	0.00468665	0.0974928
Bex1	-1.67888	1.09488	0.00124357	0.0572979
Il18rap	-1.67275	2.8622	0.0441892	0.261794
Itm2a	-1.66992	4.80597	3.53102e-05	0.0182537
Nkpd1	-1.66821	0.493718	0.00603581	0.105744
Bdh2	-1.66771	2.14115	0.0395272	0.247313
Efna4	-1.66612	1.07141	0.0274879	0.210009
Nectin4	-1.6647	2.69692	0.00550139	0.102331
H2-Ab1	-1.66104	7.59131	0.000104604	0.0257542
Gm17655	-1.6578	0.664504	0.0348965	0.232147
Mras	-1.65644	2.15628	0.00138135	0.0596623
Gm49499	-1.6548	0.972689	0.00901999	0.130479
Msmo1	-1.6509	5.41107	0.000232886	0.0312992
Hlf	-1.64749	6.13426	7.27758e-05	0.0247801
Zfp783	-1.64504	2.31875	0.0300032	0.218341
Slc25a53	-1.64041	3.00439	0.00461766	0.0971652
Fhl2	-1.63888	0.620881	0.010438	0.141124
Crispld1	-1.62902	2.28754	0.0205026	0.184995
Col4a1	-1.62584	3.41154	0.013271	0.156256
Gm24270	-1.61397	5.23924	0.00532872	0.102331
Ctnnal1	-1.61177	3.08408	0.00616795	0.106957
9030025P20Rik	-1.61129	1.61003	0.000736354	0.0476148
Kbtbd6	-1.61047	0.975948	0.0095951	0.135833
Ccdc112	-1.607	1.7868	0.0124849	0.152205
Zfp455	-1.60674	2.74206	0.000357267	0.0366879
Epcam	-1.59733	0.0308895	0.0497514	0.276162
Tnip3	-1.59653	4.12029	0.000756659	0.0476148
Sdc1	-1.5954	3.32084	0.020802	0.185498
Jaml	-1.58059	0.166047	0.0151177	0.164115
Mturn	-1.57956	2.73985	0.000949016	0.0495134
Mamdc2	-1.5792	3.25882	0.0117553	0.148484
Zscan20	-1.57685	2.50655	0.00127663	0.0581293
Fbxo36	-1.57415	1.16303	0.0146692	0.162715
Il18	-1.56984	2.96265	0.000975106	0.0506703
Esam	-1.56842	3.93728	0.0112485	0.14569
Tceal5	-1.56653	-0.873307	0.0468774	0.269148
D330023K18Rik	-1.56094	0.169971	0.0276087	0.210107
Gem	-1.56073	2.68389	0.00167866	0.0631923
Foxd2	-1.558	3.15843	0.0123246	0.151314
Tnni2	-1.55591	0.797983	0.0108012	0.14283
Traf1	-1.55115	1.74194	0.0110023	0.143652
Zxdb	-1.54449	1.39532	0.0315332	0.222946
Tmem154	-1.53988	3.87075	0.00150108	0.06153
H2-Bl	-1.52856	0.328533	0.022634	0.193564
Trim12a	-1.5119	2.87501	0.00974163	0.137008
Ndrg2	-1.51185	3.77336	0.00175943	0.0634129
Gm4951	-1.50673	1.75358	0.0415562	0.253011
Tmem53	-1.50309	-0.142484	0.0237852	0.198809
Mvd	-1.4966	3.60549	0.00480397	0.0978867
1700123M08Rik	-1.49186	0.0909425	0.0196937	0.181616
Irgm2	-1.48544	5.16373	0.00880073	0.128718
Gm44210	-1.48021	0.929248	0.00478848	0.0978867
Gm24187	-1.47089	2.16759	0.014257	0.161069
Hacd4	-1.47067	4.21909	0.00131841	0.059414
Rab40b	-1.47034	1.48775	0.00571976	0.103683
Setmar	-1.46963	2.17602	0.00698565	0.11427
Sugct	-1.46167	2.12505	0.00476501	0.0978867
Sgce	-1.4391	3.78622	0.00134724	0.0596623
Gm24245	-1.43137	3.73762	0.0066004	0.110197
Cd38	-1.43105	2.29372	0.0273589	0.209901
Hexim1	-1.43034	1.78116	0.00520873	0.101873
Gm23935	-1.43024	8.40296	0.00454035	0.0966243
Slc35d3	-1.42963	1.04027	0.0135715	0.158058
Large2	-1.42908	0.903738	0.0402007	0.249129
Mpl	-1.42168	6.63648	0.00301286	0.0789137
Pim2	-1.42048	5.02586	0.000399901	0.0381325
Rasl12	-1.41728	1.5346	0.0098016	0.137701
Ctsw	-1.40894	2.6821	0.0229912	0.195455
9030619P08Rik	-1.3997	4.01122	0.000260448	0.0330386
Lars2	-1.39533	10.2075	0.00269136	0.0747286
Cd33	-1.39157	2.86393	0.020735	0.185283
Clic5	-1.38907	1.73171	0.0205313	0.185032
5430414B19Rik	-1.38359	0.299015	0.0207209	0.185283
Tlr6	-1.37811	2.44443	0.0245883	0.201976
Mcoln2	-1.37602	4.79026	0.0127971	0.154029
Spint1	-1.37394	1.91078	0.00713692	0.115841
Armc3	-1.37308	1.97339	0.0235561	0.198562
Slc22a18	-1.37119	2.83974	0.013614	0.158166
Apbb2	-1.36819	3.75432	0.0411921	0.251527
Traf5	-1.36783	3.40652	0.00535112	0.102331
Depp1	-1.36687	2.35895	0.00540122	0.102331
Gm25911	-1.36673	3.05056	0.0160543	0.167928
Trib3	-1.36043	3.23636	0.0141544	0.160729
Agap2	-1.35944	0.746982	0.0268745	0.208418
Pnck	-1.35195	4.66558	0.00171917	0.0631941
Gm15564	-1.34913	6.00361	0.00390516	0.0912074
Aldoc	-1.34811	4.05281	0.00123782	0.0572979
Gpx7	-1.3466	1.61548	0.0440554	0.261578
Insig1	-1.3443	5.11149	9.65695e-05	0.0257542
Fhdc1	-1.34178	1.99207	0.0280222	0.211287
Marchf3	-1.3406	2.18826	0.0133479	0.156256
Dntt	-1.34018	6.42014	0.0160048	0.167545
Ccdc102a	-1.33966	1.96352	0.0499705	0.276666
Tmem121	-1.33859	3.87339	0.00588183	0.104499
Cldn12	-1.33622	3.56759	0.000996302	0.0511995
Myl6b	-1.33374	0.836344	0.00356747	0.0869293
Rad9b	-1.33187	-0.110089	0.0359773	0.235664
Phf11c	-1.33098	0.526162	0.0160808	0.167933
Tbxa2r	-1.33044	4.39358	0.0054741	0.102331
S100a6	-1.32671	4.58059	0.000653282	0.0457462
Aldh1l1	-1.32433	5.37822	0.000504422	0.0410485
Wfdc17	-1.32036	5.23529	0.00253311	0.0731606
Gm20559	-1.31705	0.968488	0.015451	0.16495
Fdft1	-1.3161	4.56795	0.00104377	0.0520859
Gng7	-1.3133	1.40959	0.0162453	0.168811
Fads3	-1.31305	2.48999	0.00656535	0.109852
Il18bp	-1.31173	2.03736	0.0470017	0.269312
Lag3	-1.30865	1.50603	0.021191	0.187673
Gm32687	-1.3069	0.198086	0.0121703	0.150488
Sytl4	-1.30461	4.00804	0.00296028	0.0787481
Abcg1	-1.30461	6.07514	0.00186873	0.0647888
Relb	-1.30264	3.62819	0.00431616	0.0954068
Gm19590	-1.30226	4.8457	0.000197938	0.0287766
Scml4	-1.29862	2.66241	0.0452247	0.26413
Ypel1	-1.29266	3.31998	0.00868363	0.128111
Maged1	-1.28882	6.15935	3.91357e-05	0.0187547
Amn1	-1.28263	2.73583	0.00228247	0.0696531
Zbtb6	-1.28208	2.22525	0.017596	0.174246
Mmp15	-1.28141	1.96824	0.0190122	0.179039
H4c3	-1.27856	1.11223	0.00546711	0.102331
F2r	-1.27084	6.48648	0.00752755	0.118924
Gm4013	-1.26877	1.22165	0.00995741	0.138232
Adam11	-1.26189	0.889455	0.0470275	0.269312
Sytl1	-1.26058	4.38212	0.0018809	0.0648985
Tgm2	-1.24744	4.23692	0.0223435	0.192606
Bbs1	-1.24128	2.54686	0.0204192	0.1845
Ptk7	-1.24059	4.39152	0.0154293	0.16495
Akr1c12	-1.23957	2.63612	0.00210372	0.0671625
5330438D12Rik	-1.23785	0.797209	0.033659	0.228311
Lck	-1.23736	3.92834	0.0386784	0.244761
Mylip	-1.2362	3.99281	0.0166247	0.170324
Dusp16	-1.23233	0.97732	0.0120036	0.149761
Gm43460	-1.23099	1.232	0.0104488	0.141124
Tgtp1	-1.23091	5.85653	0.00187271	0.0647888
Tigd5	-1.22575	3.07803	0.00200189	0.0665835
Dusp9	-1.22178	2.17244	0.0230823	0.195972
Cdkl3	-1.22154	0.620746	0.0280867	0.211287
H1f3	-1.2203	2.58084	0.00606011	0.105819
Bbs9	-1.21818	4.56755	0.00327637	0.0827987
Bok	-1.21548	3.04404	0.00896348	0.130167
Gm43568	-1.21114	2.08988	0.00255822	0.0732528
Mblac2	-1.20421	2.80455	0.0240715	0.200297
Echdc3	-1.20245	0.877655	0.0425242	0.256993
Arxes2	-1.20062	1.31691	0.0119413	0.14967
Pard6b	-1.20053	2.40156	0.0016114	0.062279
Il1r1	-1.19978	4.82155	0.00164535	0.0629856
Tmem231	-1.19845	3.27884	0.0232388	0.196775
Myof	-1.1983	4.80329	0.0274742	0.210009
2810013P06Rik	-1.18632	3.70665	0.00349957	0.0859221
Kctd12b	-1.18376	1.96393	0.0127343	0.153702
Nupr1l	-1.18175	0.00313891	0.0289425	0.21441
F2rl3	-1.18067	6.01724	0.000112038	0.0257542
Dennd1c	-1.17929	5.08058	8.21177e-05	0.0257542
Mpzl1	-1.17927	3.38118	0.00456651	0.0968625
Abcc3	-1.17726	3.70037	0.0191228	0.179278
Itgax	-1.17297	3.66501	0.0341063	0.229605
Thsd1	-1.1702	5.4785	0.0206434	0.185233
Carns1	-1.16933	2.25308	0.0244005	0.201479
Tspan6	-1.16819	3.95657	0.000508501	0.0411218
Myct1	-1.16528	5.45623	0.00026009	0.0330386
Msh5	-1.16256	2.1677	0.0332117	0.226866
Gm10499	-1.15868	0.906017	0.0443873	0.262011
Map3k12	-1.15817	1.2584	0.0122569	0.150896
Tmem86a	-1.15714	4.69444	0.00567061	0.103182
Gnb5	-1.15223	2.71931	0.0242148	0.200714
Gm8292	-1.15068	0.600759	0.0206265	0.185209
Mir6236	-1.1493	7.53817	0.00846756	0.126955
Insl6	-1.14813	3.54268	0.00297138	0.0787481
Hhat	-1.14446	3.56068	0.0133256	0.156256
Gimap6	-1.14284	6.60747	0.000416849	0.0385012
Eva1b	-1.1396	2.80698	0.00233449	0.0704667
Gm43362	-1.13361	0.87106	0.0163132	0.168997
1500009L16Rik	-1.12924	2.89742	0.00222992	0.0687254
Gm20300	-1.12706	1.77824	0.0310185	0.221275
Gm15952	-1.11476	0.486897	0.0327594	0.225945
mt-Rnr2	-1.11452	7.56317	0.000342169	0.0365374
Socs5	-1.111	4.55448	0.0428807	0.257942
B630019K06Rik	-1.10922	2.84636	0.030328	0.218781
Scarf1	-1.10824	5.19688	0.0304817	0.219601
9930012K11Rik	-1.10757	3.29652	0.00268556	0.0747279
Trim30d	-1.10579	2.35504	0.00527221	0.101969
Ccdc120	-1.10525	2.55515	0.0366496	0.237938
Dkkl1	-1.10491	4.74667	0.00340704	0.0847764
Ggact	-1.1029	1.88532	0.0151287	0.164115
Snn	-1.10206	3.73491	0.00853025	0.127451
Nfatc2	-1.10142	4.54573	0.0175881	0.174246
Maged2	-1.09804	4.86129	0.00148989	0.06153
Gm15459	-1.09259	7.52942	2.49214e-05	0.0146572
5430405H02Rik	-1.09182	0.264146	0.0492234	0.274503
Arhgap22	-1.09038	0.384437	0.0480038	0.271351
Rgs3	-1.08992	3.17075	0.00151582	0.06153
0610009L18Rik	-1.08809	1.67848	0.0272166	0.209367
Gm43305	-1.08631	3.84335	0.00491028	0.0985025
Malat1	-1.08276	4.51186	0.00789989	0.12208
Gata3	-1.08182	2.96665	0.0202576	0.183296
Carmil2	-1.08164	5.25235	0.0106916	0.142031
Slc30a1	-1.07982	2.3574	0.0303511	0.218781
Eya2	-1.07715	5.20946	0.0103052	0.140653
Rdh12	-1.07607	3.43228	0.00540317	0.102331
Pdlim2	-1.07557	5.1089	0.00160533	0.062279
Mmp11	-1.07323	1.42471	0.0326784	0.225585
Cd151	-1.07111	3.26435	0.0267068	0.208212
Tnfrsf18	-1.07107	4.24563	0.00301213	0.0789137
Lyplal1	-1.06891	2.05034	0.0447686	0.262942
Ppp1r14a	-1.06768	1.30344	0.0246583	0.201976
Gdpd3	-1.06363	3.25832	0.0368896	0.23847
Epb41l4b	-1.06147	5.2415	0.00267215	0.0745151
Rnps1-ps	-1.0584	4.15631	0.00061858	0.0452995
Trim47	-1.05826	6.27231	0.000179428	0.0283115
Fam57a	-1.05568	2.58243	0.0194687	0.180836
Plxdc2	-1.05395	3.74128	0.0165623	0.170214
Mecom	-1.05155	4.23242	0.0092134	0.131709
Fzd6	-1.04827	3.54608	0.00263638	0.0741838
Angptl2	-1.04775	2.75585	0.0411195	0.251527
Rec8	-1.0458	2.93893	0.0178978	0.175307
H2ac20	-1.04429	0.598114	0.0259901	0.205926
Rrad	-1.04372	3.80056	0.0205984	0.185209
Rasgef1b	-1.04352	4.75501	0.00236231	0.0709186
Ccm2l	-1.03941	1.90097	0.0431083	0.25847
Pvr	-1.03817	1.94552	0.0133222	0.156256
Cirbp	-1.03785	6.34263	0.000300537	0.0352399
Nupr1	-1.03689	2.38649	0.0319527	0.223861
Sesn2	-1.03619	4.56889	0.025927	0.205557
Afp	-1.03575	2.61691	0.0113962	0.146722
Pias3	-1.03479	3.82485	0.00720268	0.116494
Nipsnap2	-1.03419	5.64939	0.000470746	0.0392966
Gstm7	-1.03364	2.7438	0.0151417	0.164115
Tmem221	-1.03294	1.77018	0.0296281	0.217489
Rab33b	-1.02242	3.74647	0.00279517	0.0766244
Lrrc49	-1.02038	3.45092	0.00773449	0.120574
Lrp12	-1.0196	4.23466	0.0168493	0.170991
Adgrl4	-1.01907	9.00188	6.22459e-05	0.0244061
Cep170b	-1.0172	4.4848	0.00577919	0.103876
Krtcap3	-1.0169	1.0011	0.0395678	0.2474
Susd3	-1.01654	4.58398	0.0069101	0.113464
Rnf180	-1.01557	3.89302	0.0147337	0.162715
mt-Rnr1	-1.01512	4.37853	0.0301069	0.218656
Csad	-1.01419	5.14885	0.00729841	0.117019
Zcchc24	-1.01253	3.7785	0.0246395	0.201976
Lipo3	-1.01035	3.36621	0.0106652	0.142031
Tnfsf10	-1.00666	3.99134	0.000916816	0.0491441
Fbxo17	-1.00628	2.57729	0.0122051	0.150688
Srr	-1.00546	2.59186	0.0144482	0.161718
Rubcnl	-1.0046	2.52051	0.032213	0.224718
Rhobtb3	-1.0024	5.18717	0.00647729	0.109757
Gimap5	-1.00167	4.01955	0.0157208	0.165675
Cavin3	-1.0013	3.24034	0.0408973	0.251334
Jup	-0.995756	5.37651	0.00462145	0.0971652
Ube2l6	-0.994819	7.12602	0.000224562	0.0308645
Gng11	-0.991369	4.27466	0.0131717	0.156213
Shisa5	-0.990526	8.29849	9.07055e-05	0.0257542
Pros1	-0.983624	3.92174	0.0390744	0.245725
Plscr4	-0.983205	3.61737	0.00463335	0.0971652
Sgsh	-0.979877	4.45241	0.000398724	0.0381325
Rnls	-0.978221	2.76214	0.0250191	0.20258
Ccdc126	-0.978084	2.54962	0.0337373	0.228311
Prdx4	-0.976096	5.75449	0.000863688	0.0488003
Oasl2	-0.975873	5.78261	0.00240037	0.0713987
Ecm1	-0.975355	4.4765	0.0050199	0.100081
Laptm4b	-0.974203	5.80601	0.00102203	0.051518
Myo15b	-0.974166	1.97453	0.00911016	0.130974
Cyp2j6	-0.971862	4.04865	0.0168293	0.170991
BC064078	-0.971461	2.81801	0.0120143	0.149761
Rnf227	-0.971309	2.80356	0.0362202	0.236482
Tceal1	-0.970425	1.59545	0.0446995	0.262872
Cdkn1b	-0.968293	2.53091	0.00548096	0.102331
Dusp10	-0.968039	2.21652	0.00789346	0.12208
S100pbp	-0.966832	2.83864	0.0138944	0.159379
Ddb2	-0.966828	2.36893	0.0401765	0.249129
Icam1	-0.965431	5.78215	0.000132064	0.0266997
Rsl1	-0.965237	3.18647	0.0278797	0.210956
Lysmd1	-0.96311	2.02693	0.0237742	0.198809
Rnf122	-0.961559	4.45716	0.00663735	0.110671
Ldhb	-0.95968	5.57008	0.0021016	0.0671625
Serpinb9	-0.958868	4.31218	0.00361511	0.0876156
Sertad1	-0.958369	4.55496	0.00136231	0.0596623
Ficd	-0.954938	3.09609	0.0370807	0.239057
Rbm47	-0.953633	2.80338	0.0357725	0.235341
Ociad2	-0.952465	5.00371	0.00142653	0.0602839
Slc27a6	-0.951216	2.86607	0.011942	0.14967
Slc29a2	-0.951101	3.17127	0.00540315	0.102331
Calhm6	-0.948342	3.76541	0.0386792	0.244761
Cyp2j9	-0.94796	3.92285	0.0312556	0.222329
Naprt	-0.943346	4.2481	0.0147752	0.162911
Zfp712	-0.94273	1.00943	0.0473937	0.270144
Ptgs1	-0.942177	5.40495	0.000150811	0.0275491
Nynrin	-0.93804	5.86955	0.0120489	0.150049
Rbm3	-0.936446	7.66775	6.65817e-05	0.0245212
B330016D10Rik	-0.936422	2.40141	0.0368307	0.23847
Src	-0.93325	1.82834	0.0332484	0.226866
Ephx1	-0.93239	2.92959	0.0162592	0.168811
Tanc1	-0.931944	4.32583	0.016356	0.169034
Mmp2	-0.92923	4.02443	0.009245	0.131709
Lrrc70	-0.928039	3.25372	0.0290773	0.214987
Serpina3f	-0.92609	3.0474	0.0411793	0.251527
Birc2	-0.92535	5.09199	0.0057781	0.103876
Art4	-0.92502	4.00775	0.00479813	0.0978867
Kank3	-0.924235	3.41417	0.0126685	0.153051
Mycn	-0.924197	6.19464	0.000145738	0.027329
Bcl3	-0.921239	4.74712	0.0175373	0.174246
Ighm	-0.919853	7.78769	0.000761149	0.0476148
Tmem71	-0.918132	4.76967	0.00159119	0.062279
Tmem98	-0.917885	5.07391	0.00490468	0.0985025
Gm6658	-0.917355	0.302085	0.0449384	0.263341
Cyp51	-0.916483	5.83439	0.00372215	0.0886941
Castor2	-0.916237	3.71193	0.0302754	0.218781
Phf11b	-0.91587	3.77499	0.0136651	0.158365
Ogt	-0.911883	7.27607	0.000435986	0.0385012
Gm37238	-0.911439	0.899959	0.0216821	0.189156
Btg2	-0.907696	4.67071	0.0107232	0.142305
Tbxas1	-0.907321	6.26929	0.00103955	0.0520859
Retreg1	-0.906878	5.6134	0.000902528	0.0490592
Arhgef28	-0.906199	3.52505	0.0158699	0.166673
Hint3	-0.904538	3.06631	0.0175986	0.174246
Txnrd3	-0.903025	4.97697	0.00629361	0.108258
Clstn3	-0.899789	5.89463	0.0206616	0.185234
Nfkbie	-0.899754	5.21268	0.000827826	0.0478181
Pcp4l1	-0.895753	5.00108	0.00543176	0.102331
Ak1	-0.894771	3.71961	0.0143995	0.161586
Fbxw9	-0.893837	3.66871	0.00466375	0.0973294
Esr1	-0.893391	4.21138	0.0115043	0.146944
Tcta	-0.891568	4.27723	0.00516735	0.101611
Kbtbd7	-0.889995	3.9814	0.00762669	0.11988
Ankrd13d	-0.889546	2.21574	0.0296736	0.217489
Klf2	-0.889172	1.58433	0.0333196	0.227146
Fitm2	-0.885861	3.57301	0.00906935	0.130677
Cnksr3	-0.879749	4.7418	0.0170031	0.171878
Rps13-ps2	-0.879308	2.40459	0.022459	0.192757
AW549877	-0.879112	4.22011	0.0339951	0.229402
Socs1	-0.876265	3.24431	0.0181195	0.176195
Ubc	-0.873752	8.14659	1.41562e-05	0.0113924
Idi1	-0.872408	4.19729	0.035044	0.232455
Sqle	-0.87213	6.4474	0.000192119	0.0286305
Fnip1	-0.870016	3.91967	0.0186563	0.177887
Zan	-0.868258	1.59464	0.0479805	0.271337
Krt18	-0.867091	6.15064	0.000226413	0.0308645
Gpr171	-0.86549	6.73024	0.000814936	0.0478181
Septin1	-0.864298	6.89436	0.000301917	0.0352399
Elk1	-0.863736	3.07201	0.0186384	0.177848
Ebpl	-0.862309	4.64931	0.0016444	0.0629856
Ctu1	-0.860553	5.32946	0.00304915	0.0792229
H2-Ob	-0.859503	5.41235	0.018106	0.176195
Rtl8c	-0.857982	2.89649	0.0156692	0.165675
Tmem37	-0.85237	2.79607	0.0410039	0.251353
Cadps2	-0.852223	4.61709	0.0302254	0.218781
Paqr7	-0.851531	6.10727	0.000400711	0.0381325
Gbp2	-0.850296	5.08398	0.00234181	0.0704667
Il12rb1	-0.849897	3.99697	0.0476248	0.270865
Gpr132	-0.848496	4.00622	0.00438048	0.0957415
Fchsd1	-0.845078	3.86697	0.00556544	0.102622
Zfand1	-0.844403	4.45277	0.0100246	0.138577
CT010467.2	-0.841571	5.70318	0.0201804	0.183087
Zbed5	-0.841567	3.80807	0.0053822	0.102331
Calcrl	-0.838247	6.4223	0.00159848	0.062279
Cers4	-0.836381	5.20062	0.00089531	0.0490592
Sstr2	-0.836215	3.14769	0.0317096	0.223283
Igtp	-0.83275	6.32264	0.00984697	0.137832
Dhrs3	-0.830527	6.40155	0.00121777	0.0572979
Mettl21a	-0.829724	4.11091	0.0411881	0.251527
Sla2	-0.827209	4.59535	0.0255552	0.203961
Serinc5	-0.826273	5.00986	0.010551	0.141618
Prkcq	-0.825942	4.85714	0.0314635	0.222946
Lss	-0.825749	5.11562	0.0211675	0.187593
Tcf7l2	-0.82485	4.70562	0.00266744	0.0745151
Camk2d	-0.823882	5.28894	0.00857103	0.127523
Nabp1	-0.822288	3.34642	0.0456097	0.265884
Grasp	-0.821097	3.44166	0.00924744	0.131709
Ccrl2	-0.821095	4.09109	0.0236453	0.198809
Mettl27	-0.819981	3.79567	0.0123384	0.151324
4632427E13Rik	-0.819673	2.40048	0.0146841	0.162715
Jak3	-0.818213	8.12748	0.00594973	0.105169
Spata6	-0.816452	4.4973	0.00293447	0.0786475
Trim5	-0.814142	2.52122	0.026287	0.207101
Acss2	-0.812951	5.99165	0.000448078	0.0387355
Aph1c	-0.812276	3.86786	0.0319727	0.223861
Tmem130	-0.80785	3.28349	0.00685444	0.11298
Rusc1	-0.806359	1.89794	0.0495123	0.275204
Ifi44	-0.806345	3.4757	0.0343004	0.230432
Cd96	-0.805973	4.26247	0.0156116	0.165437
Tspan13	-0.804053	8.36411	0.000131386	0.0266997
Ctsf	-0.803075	5.21737	0.0140243	0.160079
Nsun3	-0.802702	4.27943	0.0141418	0.160729
Il10ra	-0.80224	5.0337	0.00153599	0.06153
Ltbp3	-0.799525	6.45078	0.00251456	0.0729898
Ctso	-0.799412	5.88996	0.000820856	0.0478181
Slc16a13	-0.795792	3.9278	0.00751645	0.118924
Gm10156	-0.794721	2.49775	0.0271017	0.208946
Sesn1	-0.792483	7.4708	0.00152574	0.06153
Klhl9	-0.791842	5.63951	0.00794049	0.122458
Kif3c	-0.791015	3.04541	0.0426055	0.257181
H2-Oa	-0.790106	3.65517	0.00993598	0.138232
Dipk1b	-0.789121	6.4274	0.00439099	0.0958094
Arvcf	-0.788027	4.18272	0.0142937	0.161243
H2ac8	-0.787285	5.18422	0.00478566	0.0978867
Plgrkt	-0.787146	5.67995	0.00198398	0.0663325
Traf3ip2	-0.785994	2.96398	0.0399766	0.248443
Lysmd2	-0.785447	3.30633	0.0296762	0.217489
Mfng	-0.785416	6.57969	0.020981	0.186451
Klhl42	-0.782329	5.20972	0.0478368	0.270893
Thnsl1	-0.778137	3.70882	0.0133133	0.156256
Mfge8	-0.77753	8.03784	0.00017076	0.0283115
Lemd3	-0.777379	4.71239	0.00448251	0.0966243
Hmgcs1	-0.777036	5.24621	0.0281535	0.211421
Txnip	-0.776983	8.01991	0.000160496	0.0276888
Bri3	-0.775921	2.04746	0.0344145	0.231031
Tmem35b	-0.775237	4.74362	0.0144935	0.161944
Arl6	-0.774266	3.47866	0.0228591	0.194716
AI467606	-0.772754	6.90661	0.000474321	0.0393413
Il1rap	-0.770221	4.23886	0.023733	0.198809
Il2rg	-0.769962	6.75285	0.0045207	0.0966243
Adck2	-0.766373	4.53574	0.00728715	0.117019
Pdzk1ip1	-0.765089	5.63843	0.000714837	0.0476148
Pomgnt2	-0.764597	5.35566	0.0305942	0.21993
Slc35b3	-0.764027	4.17806	0.00636393	0.108775
Socs4	-0.761402	2.79038	0.0313175	0.222647
Tmem40	-0.761344	5.8711	0.000340888	0.0365374
Armc10	-0.760835	5.43649	0.00493262	0.0987975
Tctex1d2	-0.758407	4.03996	0.0106387	0.142031
Bpnt1	-0.757164	4.31981	0.0410369	0.251353
Tgtp2	-0.755566	7.19368	0.0176414	0.174246
Dusp2	-0.754843	5.48155	0.042706	0.257436
Zfp12	-0.754727	5.10456	0.0147815	0.162911
Clcf1	-0.749814	2.7748	0.0339898	0.229402
Plaat3	-0.749302	5.58709	0.00138966	0.0596623
Acox3	-0.749256	5.73644	0.0119574	0.14967
Gfod2	-0.749161	3.83237	0.0382418	0.243749
Fam214a	-0.748776	4.18582	0.0207913	0.185498
Entpd1	-0.748186	4.36854	0.015477	0.164956
Nfkb2	-0.74757	4.83612	0.02862	0.213684
Antxr2	-0.747156	5.1918	0.0187974	0.178182
Lacc1	-0.74684	3.65644	0.0400589	0.248704
Slc27a1	-0.746574	5.88922	0.00443225	0.0963435
Ccl27a	-0.746011	1.80338	0.0329324	0.226414
Ccl27a	-0.746011	1.80338	0.0329324	0.226414
Ccl27a	-0.746011	1.80338	0.0329324	0.226414
Ccl27a	-0.746011	1.80338	0.0329324	0.226414
Btg3	-0.745564	3.07148	0.0271134	0.208946
Asb3	-0.744902	5.00086	0.00729363	0.117019
H2-T22	-0.743248	5.74187	0.00232121	0.0703377
H2-T22	-0.743248	5.74187	0.00232121	0.0703377
Gm14597	-0.741655	1.29283	0.039057	0.245725
4931414P19Rik	-0.741611	3.20673	0.0297838	0.217839
Ypel5	-0.739073	5.45951	0.00612748	0.106668
Agpat3	-0.73626	4.81224	0.0116232	0.147734
Rhof	-0.73361	4.72258	0.0275553	0.210107
Hbb-bs	-0.733545	3.20349	0.0106684	0.142031
Hbb-bs	-0.733545	3.20349	0.0106684	0.142031
Fbxl5	-0.732155	6.21085	0.0017756	0.0635836
BC147527	-0.731006	2.87371	0.036575	0.237692
Cd274	-0.729107	4.5869	0.0431793	0.258664
Dock7	-0.72819	5.2992	0.00280149	0.0766351
Sec22a	-0.725655	5.11002	0.00425096	0.0953393
Kptn	-0.725398	4.9207	0.00215424	0.0678191
Uba7	-0.724677	7.23313	0.000286944	0.0350261
Ier5	-0.72464	4.60313	0.0306137	0.21993
Klk8	-0.718961	3.84569	0.0272959	0.209728
Fbxo4	-0.718529	4.33894	0.0278586	0.21092
Avpi1	-0.718154	3.72073	0.0206156	0.185209
Ilvbl	-0.716993	6.16986	0.000484086	0.0398954
Capg	-0.716783	7.89827	0.0236516	0.198809
Pink1	-0.716633	7.83647	0.00174432	0.063331
Dhcr7	-0.7163	5.97547	0.0081988	0.124854
Rnf11	-0.715982	5.6153	0.00161726	0.062279
AW112010	-0.713526	5.6602	0.00403267	0.0930768
Spata13	-0.713274	5.33422	0.0015334	0.06153
Nudt14	-0.712829	5.63104	0.000574141	0.0436989
Abcg2	-0.712283	6.09344	0.00331118	0.0831875
Repin1	-0.712168	6.72274	0.00887727	0.12906
Mgmt	-0.711737	4.31109	0.0056485	0.103031
Tep1	-0.711374	4.8287	0.0386043	0.244761
Plod1	-0.709188	4.37696	0.0186061	0.177827
Klf10	-0.709083	7.23294	0.000388352	0.0380673
Haghl	-0.709016	5.07625	0.0215105	0.188784
Prkch	-0.708213	6.37914	0.00143034	0.0602839
Gm28437	-0.707911	4.76967	0.0155297	0.165245
Ginm1	-0.707774	5.09756	0.0102617	0.140504
Gimap1	-0.707202	6.77185	0.0037486	0.0891602
Mthfsl	-0.706049	4.13484	0.0180604	0.176195
Fbxo30	-0.705158	4.42021	0.0446109	0.262668
Lfng	-0.704625	5.13649	0.0214333	0.188528
Dhx35	-0.704466	5.03017	0.0197642	0.181755
2410022M11Rik	-0.703459	2.52323	0.0382943	0.243843
Trmo	-0.702639	4.78462	0.0191485	0.179278
Vsig10	-0.702541	3.93287	0.0186034	0.177827
Plcg1	-0.702271	6.16677	0.0163025	0.168997
Arl13b	-0.701778	2.49697	0.0396415	0.247669
mt-Co1	-0.700687	7.59804	0.0437389	0.260376
H4c4	-0.699886	4.77363	0.037957	0.242411
Ccdc28a	-0.69848	3.57039	0.0300743	0.218613
Enpp5	-0.697135	5.26448	0.00401889	0.093024
mt-Co3	-0.696326	4.96469	0.0115735	0.147275
Slc2a1	-0.696144	5.70776	0.0103992	0.141124
Serpina3g	-0.695435	6.8781	0.0234416	0.197854
Npc1	-0.693662	4.24633	0.0121772	0.150488
H2-DMb1	-0.693001	6.03756	0.00123729	0.0572979
Bcas3	-0.691892	6.11749	0.00580816	0.103944
Pramef8	-0.689485	5.40143	0.0198646	0.182195
Hmgcr	-0.688988	6.81398	0.0322168	0.224718
Acsf2	-0.688696	4.71323	0.0201953	0.183087
Rnf103	-0.687602	5.04571	0.0124299	0.152158
Inpp5k	-0.687493	7.08503	0.000463576	0.038993
Rbm12b2	-0.68717	2.33545	0.0449328	0.263341
Ptms	-0.687153	4.12469	0.0321005	0.224433
Stoml1	-0.686433	4.66895	0.00808327	0.124215
Scd2	-0.686087	8.39279	0.000661144	0.0457462
Pdp2	-0.681137	5.07059	0.045772	0.266154
Cdk5rap1	-0.681117	4.07822	0.0279533	0.211287
Trim23	-0.680738	4.00396	0.0471815	0.269528
Gsn	-0.680714	6.78179	0.00652966	0.109852
Slc46a3	-0.680533	3.33088	0.0299963	0.218341
Irs2	-0.680114	4.20446	0.0319019	0.22385
Lat	-0.67736	5.64687	0.010493	0.141279
Snx24	-0.676701	2.78713	0.0492266	0.274503
Tmem9	-0.673926	6.28775	0.000421561	0.0385012
Il15	-0.673027	4.21919	0.0414704	0.25263
Parp12	-0.671869	5.67239	0.0482471	0.272131
Atp6v0c-ps2	-0.671335	5.35885	0.0250075	0.20258
Eid1	-0.668518	4.63503	0.0190086	0.179039
Rbpms	-0.667203	6.42941	0.00419432	0.0948781
Tmem263	-0.666264	4.75981	0.0198842	0.182211
Abcb1b	-0.666188	5.52518	0.0294078	0.216672
H2-Q7	-0.665796	8.13769	0.00053602	0.0417805
H2-Q7	-0.665796	8.13769	0.00053602	0.0417805
Trp53i13	-0.665454	5.40362	0.00153285	0.06153
Oas3	-0.664568	5.49518	0.0424274	0.256647
Cryzl2	-0.663448	5.09061	0.00461866	0.0971652
mt-Nd2	-0.663364	3.76305	0.0223921	0.192668
Rcn3	-0.663141	5.81252	0.00600298	0.105533
Pdk1	-0.661506	6.92704	0.00091915	0.0491441
Yipf4	-0.661505	5.60154	0.00925291	0.131709
Capn2	-0.660955	5.49781	0.0231495	0.196414
Ctxn1	-0.659991	3.01677	0.0484487	0.272616
Arl5b	-0.657063	3.05438	0.0230147	0.195526
Galm	-0.65697	4.33603	0.0205664	0.185184
Epm2aip1	-0.654836	4.32171	0.0430016	0.258264
Smox	-0.654603	5.24186	0.0132741	0.156256
Car2	-0.652715	9.78976	0.0106872	0.142031
Tob1	-0.652157	4.23373	0.0309366	0.221201
Gnpda2	-0.649524	4.62857	0.045991	0.266938
Ifi47	-0.649509	7.78634	0.000118619	0.0260819
Tapt1	-0.649179	6.72442	0.00432219	0.0954068
Rab38	-0.648847	7.16141	0.000768812	0.0476148
Aar2	-0.647504	6.51333	0.00201721	0.0665835
Nceh1	-0.647363	6.95053	0.0169266	0.171372
Tbce	-0.646792	4.50019	0.0430141	0.258264
Fbp1	-0.645063	5.00519	0.0178231	0.175186
Dram2	-0.643756	4.77848	0.0290812	0.214987
Neurl3	-0.641831	6.02588	0.0015109	0.06153
Slc25a24	-0.641613	5.27189	0.00650648	0.109762
Ggt5	-0.640365	4.17004	0.0332611	0.226866
Gcnt2	-0.639832	7.23674	0.0137516	0.158546
Ppcs	-0.633284	4.88685	0.0185714	0.177827
Mmgt2	-0.632531	4.96254	0.00538487	0.102331
Inka1	-0.63227	6.92478	0.000463541	0.038993
Dcaf10	-0.630646	4.72258	0.0295331	0.217119
Hnmt	-0.629037	3.94153	0.0221897	0.192048
Lamc1	-0.627389	4.50554	0.0484595	0.272616
Gm12250	-0.627289	4.54594	0.0255488	0.203961
Cd9	-0.625805	7.12767	0.00524366	0.101873
Pafah1b3	-0.625474	5.32081	0.00670279	0.111475
Aldh1a1	-0.625244	4.90585	0.0255995	0.203961
Irf5	-0.623014	5.43565	0.026731	0.208212
Ano10	-0.623003	5.28648	0.0308716	0.220934
Tnip2	-0.621476	4.8091	0.00515036	0.101586
Ier3	-0.621313	4.12624	0.0254015	0.203763
Bloc1s3	-0.62122	3.85124	0.0265476	0.207804
Akr1c13	-0.620503	6.15183	0.00710186	0.115441
Arl2bp	-0.618751	6.74977	0.00107172	0.052726
Rps15a	-0.61805	7.08723	0.00161299	0.062279
Fbxo32	-0.617732	3.65952	0.0386843	0.244761
Jund	-0.617564	4.99411	0.00905307	0.130588
F8a	-0.616815	5.04134	0.0151084	0.164115
Uba6	-0.616507	5.52825	0.0142605	0.161069
Lrfn1	-0.616234	4.02515	0.0233471	0.197185
Sptssa	-0.616221	7.34083	0.00364065	0.0877399
Ctnnbip1	-0.615185	3.86257	0.0280772	0.211287
Dis3l	-0.614916	5.24738	0.0446181	0.262668
Dpysl2	-0.614305	4.81968	0.0114945	0.146944
Gnb4	-0.614252	6.45989	0.0114758	0.146869
Tmbim1	-0.614025	6.89703	0.00282016	0.076821
Kdm6a	-0.613975	5.58361	0.0154482	0.16495
Suox	-0.613182	4.41144	0.0290935	0.214987
Anxa11	-0.61248	4.53857	0.0124761	0.152205
Pigx	-0.609604	6.23525	0.0120662	0.15012
Dcp1b	-0.608298	3.89971	0.0294495	0.216751
Grcc10	-0.607248	2.70557	0.0434317	0.259448
Coq8a	-0.606627	6.7284	0.0117862	0.148637
Gna11	-0.606588	4.22559	0.0465085	0.268649
Il4ra	-0.604881	6.65913	0.0183125	0.176936
Irf2bpl	-0.604305	4.95228	0.0398919	0.248225
Ctla2a	-0.603649	6.26891	0.0165617	0.170214
Tm2d2	-0.60347	6.93448	0.00143718	0.0603756
Gpr146	-0.601636	5.16334	0.0400763	0.248704
CT010467.1	-0.600811	8.6353	0.0432925	0.258855
Arhgap12	-0.600405	3.63405	0.0379082	0.242339
Tmem219	-0.598902	4.1268	0.0263138	0.207101
Lypla1	-0.596916	5.66661	0.00481773	0.0978867
Tes	-0.596069	7.44138	0.00139715	0.0596623
Mboat1	-0.596053	4.9334	0.0177403	0.175087
Hdac6	-0.59579	5.97381	0.0490599	0.273969
Rps19-ps6	-0.593973	4.7812	0.0301139	0.218656
Crlf2	-0.592909	6.79821	0.00129163	0.0584349
Ypel3	-0.592137	6.76224	0.00139054	0.0596623
Gcnt1	-0.591675	5.10319	0.0284751	0.213312
Saraf	-0.588882	8.26631	0.000193324	0.0286305
Selenop	-0.587949	7.45616	0.00455882	0.096858
Rdh14	-0.58766	4.96022	0.0176215	0.174246
Dcun1d1	-0.586893	6.95416	0.00840732	0.126638
Ppic	-0.585941	5.20809	0.0184779	0.177627
Tnfrsf26	-0.585829	4.89673	0.0463238	0.268061

## Sheet: Up_1
Gene_Symbol	Fold_Change	Average_Expression	p-Value	Adjusted_ p-Value
S100a9	4.99807	1.21405	0.00190627	0.0651011
Bhlha15	4.80982	-1.56443	0.0174583	0.174246
S100a8	4.55389	2.44425	6.19193e-05	0.0244061
Slc36a2	4.00872	-0.892264	0.0467815	0.269148
Shc4	3.44143	-0.0332085	0.0156871	0.165675
Baiap3	3.31392	0.681634	0.0270519	0.208946
Ermap	3.2494	3.06669	0.0109249	0.143652
Trgc1	3.17598	-0.248523	0.0199483	0.182254
Gpc4	3.13324	-0.104788	0.00936258	0.133124
Lcn2	3.00531	0.964301	0.0102289	0.140351
Clock	2.792	1.42364	0.0221452	0.191792
Dok4	2.7072	0.0206083	0.00952955	0.135201
Prss50	2.69009	2.024	0.0246196	0.201976
Atp1b2	2.63401	3.33001	0.00815938	0.124614
Chd5	2.57844	0.416972	0.00843599	0.12665
Mtus1	2.54906	2.85578	7.73536e-05	0.0256635
Garem1	2.54602	0.885915	0.0103655	0.140942
Cenpf	2.52129	4.54715	6.35747e-06	0.00991353
Rev3l	2.4435	3.18009	0.000106767	0.0257542
Sphk1	2.40411	2.84274	0.038057	0.24293
Brca2	2.40114	4.16533	2.88143e-06	0.00991353
Car1	2.3842	7.23982	0.0153961	0.16495
Cenpe	2.33892	4.62239	0.000142299	0.0272871
Gm5843	2.32046	0.37954	0.0189241	0.178791
Cldn13	2.28348	1.88416	0.0246132	0.201976
Snhg17	2.23472	1.83873	0.0209219	0.186177
Cebpe	2.20661	3.71654	0.000614554	0.0452995
Nin	2.17938	5.18742	5.17866e-05	0.0231057
Pyroxd2	2.1781	0.4194	0.0312376	0.222323
Mki67	2.1758	6.38243	6.70937e-07	0.00434063
Trim45	2.14072	1.64036	0.034721	0.231575
Zfp568	2.12468	2.5266	0.00296604	0.0787481
Papss2	2.12026	2.34377	0.00255775	0.0732528
Ccdc167	2.11854	0.196812	0.0237411	0.198809
Elane	2.0924	9.85659	0.00453765	0.0966243
Sgms2	2.08473	1.28108	0.0129442	0.154802
Hsd11b1	2.07584	1.43075	0.00965033	0.136316
Gcc2	2.07292	3.13978	0.00452718	0.0966243
St8sia6	2.0504	1.68493	0.0128255	0.154085
Smim1	2.03743	1.26837	0.0334559	0.227476
Ankrd26	1.99035	2.97753	0.000344506	0.0365374
Chd7	1.98093	2.19794	0.0169733	0.17171
Casp8ap2	1.97691	4.70953	5.36255e-06	0.00991353
Usp31	1.95231	2.957	0.00325135	0.0823272
Vps13d	1.94674	1.83686	0.00526052	0.101969
Mylk3	1.92591	1.11627	0.0399153	0.248225
Rtn4rl1	1.91445	1.42412	0.0146358	0.162703
Rhag	1.90981	1.97698	0.0489799	0.27364
Cep162	1.90746	3.14988	0.000120946	0.0260819
Knl1	1.90214	4.6535	1.06497e-05	0.0101689
Gm11914	1.89612	2.03028	0.00500964	0.10003
Ccdc88a	1.89465	4.31024	0.000658587	0.0457462
Zfp820	1.88726	0.0820763	0.0389386	0.24553
Hdc	1.87877	5.89671	0.00576816	0.103876
Bod1l	1.8752	4.70593	0.00089578	0.0490592
Tpr	1.84454	6.56021	0.000272018	0.0338427
Cep350	1.83636	4.98028	0.000336336	0.0365374
Smc4	1.81952	6.55652	0.000104153	0.0257542
Tdg-ps2	1.80937	3.37543	0.000313838	0.0353746
Gm4759	1.78247	3.23179	0.0105338	0.141533
Dgat2	1.78199	1.96398	0.000685834	0.0464608
Slc38a5	1.77536	3.55407	0.0451156	0.264021
Gbp7	1.7748	5.771	0.000172176	0.0283115
Snhg5	1.7731	2.30039	0.000520126	0.0415427
Cep290	1.76691	1.36776	0.0222647	0.19244
Mfap3l	1.73186	0.347755	0.0274948	0.210009
Trem3	1.68615	3.77671	0.00619921	0.107092
Nipbl	1.67361	4.34608	0.00210877	0.0671625
Zfp493	1.672	1.6752	0.0294221	0.216672
C3	1.66755	4.88494	0.00534736	0.102331
Ly6c2	1.66594	5.45272	0.0126175	0.152964
Kif14	1.66417	2.09928	0.0177671	0.175087
Eif5b	1.65824	5.10438	0.00242444	0.0717846
AW011738	1.6578	-0.175706	0.0366246	0.237895
Tcf20	1.64686	1.91712	0.0125908	0.152896
Kif15	1.6395	5.29143	1.10028e-05	0.0101689
Hmgn5	1.62688	4.75146	0.000404992	0.0382496
Cep83	1.62556	3.67408	0.0235972	0.198779
Atp8b4	1.59979	6.94919	7.26574e-05	0.0247801
Eif2ak2	1.59447	3.96249	0.000685178	0.0464608
Spata5l1	1.57458	2.61898	0.00882392	0.128718
Ly6c1	1.5651	1.22851	0.0262964	0.207101
Cntln	1.55945	4.04781	0.00631691	0.108258
Mapkbp1	1.5478	2.3308	0.0337905	0.228311
Cep128	1.54582	5.64002	0.000208014	0.0292554
Mt1	1.54112	5.44997	0.00119633	0.0571192
Zc3h12a	1.53589	1.75816	0.00579915	0.103927
Gen1	1.53442	3.15219	0.00311442	0.0802738
Kif20b	1.53392	4.94869	0.00214616	0.0677297
Map2k3os	1.53324	0.548013	0.0387673	0.244946
Slc24a3	1.5289	2.03152	0.0470396	0.269312
Ttf1	1.52686	3.68596	0.0150571	0.164115
Optn	1.52182	4.19039	0.00481906	0.0978867
Snhg15	1.51808	2.64476	0.00135745	0.0596623
Tnrc6b	1.51534	4.37882	0.00272474	0.0753512
Cntrl	1.51463	5.40102	0.00255581	0.0732528
Atrn	1.49734	4.72102	0.000108057	0.0257542
Mphosph9	1.49383	3.48153	0.0133476	0.156256
Akap9	1.48777	5.0894	0.000825667	0.0478181
Klf1	1.48467	5.51566	0.0342754	0.230384
Uvssa	1.48345	1.62551	0.0180896	0.176195
Ms4a3	1.47962	6.53225	0.0176159	0.174246
Rock1	1.47462	5.69741	0.000457391	0.038993
Ice1	1.47227	4.95095	0.00159202	0.062279
Gm20768	1.46874	0.108112	0.0330631	0.226662
Lcorl	1.46256	3.18019	0.00584871	0.104238
Kdm5d	1.45733	3.47019	0.0117626	0.148484
Epor	1.45595	3.67387	0.00170064	0.0631923
Tnrc6a	1.45418	3.29756	0.0143958	0.161586
Tfrc	1.45247	5.2084	0.00510045	0.101064
Macf1	1.45126	5.32747	0.000439972	0.0385012
Ccdc18	1.44569	2.42585	0.028817	0.21424
Ces2g	1.43679	5.25677	0.0376041	0.241349
Celsr1	1.41776	1.60506	0.0183968	0.177242
Cyp4f18	1.41433	2.19344	0.0150209	0.164014
Gm42547	1.41331	1.85015	0.019753	0.181755
Upf2	1.40989	4.39331	0.0070496	0.11488
Hmmr	1.40797	5.56661	7.66174e-06	0.00991353
Ss18l1	1.40649	1.77053	0.039166	0.245885
Smc2	1.40447	6.12116	0.000306753	0.0353746
Bace1	1.40377	4.57196	9.82326e-05	0.0257542
Ticrr	1.40372	4.81424	0.00567786	0.103182
Esf1	1.39911	3.66406	0.00297112	0.0787481
Dgkh	1.39877	1.58865	0.0154096	0.16495
Psd3	1.39463	2.26587	0.00481557	0.0978867
Trim56	1.38139	2.08752	0.0346772	0.231521
Thap6	1.37322	1.58851	0.0269173	0.208538
Sgo2a	1.37222	2.39605	0.000784961	0.0478181
Ddx3y	1.37207	3.98865	0.0142101	0.161069
Ankrd12	1.37068	4.07453	0.000947843	0.0495134
Ktn1	1.36402	4.5489	0.00178107	0.0635836
Ceacam1	1.36312	3.03951	0.0153277	0.16495
Gm20008	1.35397	1.99771	0.0377743	0.241842
Vamp1	1.34336	1.65649	0.0346453	0.231521
Nol8	1.3364	4.27837	0.000387498	0.0380673
Nucb2	1.33429	2.77191	0.00674728	0.112032
Siglece	1.33237	1.20397	0.0416587	0.253371
Pou2f2	1.32475	3.36827	0.0043522	0.095608
Slc45a3	1.32444	3.56801	0.0253167	0.203763
Mpo	1.31098	13.0581	0.00995159	0.138232
Sipa1l1	1.31044	6.19136	0.0112815	0.145826
Ppig	1.31011	4.97576	0.00504643	0.100455
9930021J03Rik	1.3064	2.92668	0.010985	0.143652
Usp32	1.30107	3.2716	0.0334256	0.227389
Kcnq1ot1	1.30094	2.00731	0.00630738	0.108258
Spa17	1.29483	-0.201091	0.0406773	0.25067
Pibf1	1.29326	3.44547	0.00871224	0.128111
Gm10524	1.2852	2.00748	0.0213277	0.188216
9930104L06Rik	1.28256	3.01025	0.0055312	0.102533
Met	1.28113	3.2344	0.0285536	0.213558
Ranbp2	1.2807	6.35853	0.000640004	0.0457462
Deptor	1.28046	4.46104	0.000906403	0.0490592
D030028A08Rik	1.28017	3.89527	0.0167535	0.170686
Tirap	1.27829	2.96808	0.0475036	0.270532
Ccar1	1.27776	6.96715	0.000906559	0.0490592
Bdp1	1.27024	3.39304	0.0145247	0.162153
Mdn1	1.26999	4.21906	0.00123937	0.0572979
Igsf6	1.26829	4.86919	0.0064987	0.109762
Prrc2c	1.26572	5.19072	0.000839618	0.0480583
Tgm1	1.26468	1.91229	0.0291781	0.215474
Trip11	1.2639	3.75853	0.00433567	0.0954068
Smc6	1.26357	5.79593	0.00134765	0.0596623
Akap17b	1.25919	2.3717	0.0140369	0.160079
Gm12020	1.25838	1.2797	0.00304635	0.0792229
Myo9a	1.25703	3.00073	0.0137161	0.158365
Hsp90b1	1.25576	8.19159	7.17773e-06	0.00991353
Mphosph10	1.2531	5.29219	0.00015742	0.0276626
Gm13231	1.24356	0.929297	0.0148578	0.162918
Top1	1.23023	5.87426	3.66795e-05	0.0182537
Arid3a	1.22642	4.18895	0.00867787	0.128111
Pik3r6	1.22634	2.72592	0.0359898	0.235664
Ckap5	1.22501	6.86771	0.000100667	0.0257542
Rps13-ps1	1.22486	3.57085	0.000759403	0.0476148
Prpf4b	1.2231	5.51533	0.0024083	0.07147
Mns1	1.22274	4.83442	0.00354606	0.0867342
Kif4	1.2204	5.40778	0.00201702	0.0665835
Myh10	1.21629	2.38132	0.0219835	0.190646
Dhdh	1.21512	1.92063	0.00560658	0.102834
Atrx	1.21102	6.21056	0.000656835	0.0457462
Gm8730	1.20952	6.98276	0.000207213	0.0292554
Kiz	1.20937	4.22633	0.00239746	0.0713987
E130317F20Rik	1.20914	1.14402	0.0132982	0.156256
Ifi209	1.20389	3.28652	0.0149476	0.163488
Dock5	1.19974	4.74595	0.0316903	0.223283
Cdc42bpa	1.19795	2.41069	0.0209358	0.186177
Ckap2l	1.1971	6.15646	0.00026764	0.0336212
Rbmx2	1.19542	2.75264	0.00728293	0.117019
Gm13034	1.19284	1.30575	0.00657126	0.109852
Zfp106	1.19213	7.02964	0.000464095	0.038993
Rbbp8	1.1911	4.98046	0.00194624	0.0656554
Golgb1	1.18948	4.62336	0.0042387	0.0953393
Slc28a2b	1.18833	3.40987	0.00102266	0.051518
Herc1	1.1825	5.02581	0.00196784	0.0659633
Rtel1	1.18156	4.9364	0.00462656	0.0971652
Rsf1	1.17629	4.45995	0.00171113	0.0631923
Gm13136	1.17234	1.41662	0.0134858	0.157485
Smarca5-ps	1.16687	1.56449	0.00606945	0.105839
Rad50	1.16532	6.3107	0.000234641	0.0312992
Zfp609	1.16498	2.91375	0.0263582	0.207102
Zfp518b	1.1597	2.38721	0.0186215	0.177827
Hsph1	1.15377	6.60426	7.21537e-06	0.00991353
Uty	1.15335	4.00581	0.0128714	0.154206
Pcm1	1.15308	4.79598	0.0022377	0.0687733
2610021A01Rik	1.15228	3.87261	0.00444525	0.0963435
Hba-a1	1.14745	1.24603	0.0466296	0.269013
Larp4b	1.14281	6.8719	3.32815e-05	0.0182537
Dkc1	1.14208	7.6467	0.000437438	0.0385012
Golga3	1.13962	5.23696	0.000387168	0.0380673
A630089N07Rik	1.13917	2.57279	0.0252407	0.203403
Fbxl12	1.13649	2.63051	0.0051098	0.101094
Usp45	1.13077	2.83413	0.0102082	0.140217
Gm9625	1.12799	4.98279	0.0018231	0.0641121
Micall1	1.12774	3.66425	0.00134833	0.0596623
Gm7072	1.12454	2.83582	0.025559	0.203961
Tmf1	1.12204	4.71667	0.00349753	0.0859221
4732487G21Rik	1.12116	0.262271	0.0248568	0.202351
Golga4	1.12014	5.44811	0.00411405	0.093883
Epdr1	1.11444	4.32476	0.00191774	0.0651275
Morrbid	1.11288	1.22014	0.0399223	0.248225
Eea1	1.11061	3.99742	0.0428467	0.257857
Rrbp1	1.1096	6.68384	0.00139447	0.0596623
Hpn	1.10551	2.39483	0.0442553	0.261794
Ttc3	1.1043	6.12795	0.000932697	0.0494597
Spag5	1.10372	5.02269	0.0485113	0.272671
Usp16	1.10313	4.45872	0.00427951	0.0953393
Il6ra	1.10208	4.12257	0.0192236	0.179462
Zfp946	1.10087	2.08022	0.0306443	0.21993
Zfp638	1.10021	5.60814	0.00648075	0.109757
Gm20324	1.1002	2.32523	0.00562691	0.102834
Dnajc21	1.09938	4.10347	0.00323403	0.0822105
Pde3b	1.09381	4.27817	0.00526813	0.101969
Gm13135	1.09347	0.461335	0.0296918	0.217489
Tshz1	1.09261	4.77759	0.0325071	0.225528
Parm1	1.09238	2.09015	0.0428212	0.257824
Upf3b	1.08978	3.3875	0.00618318	0.106957
Hspb6	1.08851	1.814	0.0140654	0.160205
Zbtb20	1.08637	4.66574	0.0156962	0.165675
Rgcc	1.08556	4.67009	0.00142215	0.0602839
Atm	1.08082	4.37962	0.017026	0.171975
Dio2	1.08015	1.30821	0.0219618	0.190586
Nemf	1.0796	5.80538	0.000316845	0.0353746
Gpt	1.07831	2.04046	0.0247956	0.202162
Arfgef1	1.07736	5.73106	0.00653803	0.109852
Bahcc1	1.07387	3.61895	0.00969785	0.136838
Rif1	1.06473	5.93891	0.00137067	0.0596623
Abcd2	1.06315	4.41668	0.0326195	0.225585
Pdss2	1.05807	3.70247	0.00994761	0.138232
Cenpj	1.05803	3.14745	0.0460703	0.267071
Spdl1	1.05718	4.41005	0.000665785	0.0458223
Bambi-ps1	1.05405	0.89443	0.0205353	0.185032
Birc6	1.04634	5.27712	0.00246321	0.0722709
Mis18bp1	1.04484	4.80999	0.00452953	0.0966243
Zfp62	1.04152	4.79864	0.0115758	0.147275
Utp14a	1.03902	4.18538	0.0024573	0.0722709
Wdr59	1.03716	3.65857	0.00775123	0.12069
Atf4	1.03537	5.32661	0.00179791	0.0637346
Ncor1	1.03516	7.03784	0.00213079	0.067409
Neto2	1.03169	2.98867	0.0376723	0.241547
Serac1	1.03132	1.12222	0.0497078	0.276038
Gm13498	1.03131	1.54127	0.0221089	0.191605
Larp1b	1.03108	3.10996	0.011815	0.14871
Rnf125	1.02901	5.15077	0.000945543	0.0495134
Blm	1.02796	4.98173	0.000527008	0.0417805
Tnrc6c	1.02614	4.7747	0.00318596	0.081148
Ap3s1-ps2	1.02438	1.22345	0.0200469	0.182538
Phf3	1.02375	5.33786	0.00210978	0.0671625
Edrf1	1.02306	4.21923	0.0443191	0.261794
Mastl	1.02023	2.82315	0.0461611	0.267478
Ccdc77	1.01993	3.65289	0.011457	0.146869
Bptf	1.01844	4.25053	0.0213908	0.188411
Nat8l	1.01799	2.45778	0.0348457	0.231928
Scnn1a	1.01609	2.50305	0.0376957	0.241578
Proz	1.01434	0.487147	0.0406672	0.25067
Gm5909	1.01381	1.37207	0.0365337	0.237543
Ncl	1.01367	9.27578	9.85304e-06	0.0101689
Plod3	1.01314	6.26361	0.000593213	0.0446255
Bclaf1	1.01109	6.57127	0.00074376	0.0476148
Znrf3	1.00827	2.93502	0.0487647	0.273473
Brca1	1.00726	5.08063	0.000997161	0.0511995
Kif13a	1.00575	5.33962	0.00884121	0.128769
Eprs	1.00362	8.2077	0.000107835	0.0257542
D430042O09Rik	1.00061	2.56474	0.0166078	0.170324
8030462N17Rik	0.998068	2.16203	0.0215881	0.189156
Ptpn7	0.995975	7.66673	0.00114208	0.0555539
Pfkfb3	0.992455	4.59383	0.00276923	0.0760744
Anxa3	0.992408	6.23553	0.0016964	0.0631923
Intu	0.992097	2.11699	0.0246379	0.201976
Apbb3	0.990954	2.23447	0.0450139	0.263636
Cep170	0.990473	4.91468	0.0212364	0.18769
Pop1	0.988523	4.26881	0.0337871	0.228311
Rfc1	0.988378	6.17408	0.00124878	0.0572979
Slc16a7	0.987985	3.50582	0.0206722	0.185234
R3hdm1	0.985877	5.61892	0.00106796	0.052726
Gm9333	0.984246	2.75519	0.00649705	0.109762
Ncoa6	0.981214	4.8907	0.0151431	0.164115
Stx2	0.98097	5.86006	0.000239962	0.0316824
Dnajc25	0.980474	2.63322	0.0161805	0.168703
Apc	0.980192	4.32922	0.0132025	0.156256
Alkbh8	0.979808	4.23152	0.00342259	0.0849998
Aspm	0.977885	5.18465	0.00192319	0.0651416
Nsd1	0.976328	5.78959	0.000180463	0.0283115
Fam160b2	0.974387	4.3447	0.00782052	0.121185
Paxbp1	0.970861	4.1901	0.00472087	0.0977334
Fbf1	0.970804	4.91094	0.00293076	0.0786475
Zfp326	0.970403	3.58006	0.00404275	0.0930768
Uhrf1bp1	0.97026	4.86585	0.0354301	0.23392
Trbv13-2	0.968405	1.16255	0.0241888	0.200714
Plekhg3	0.968272	4.27207	0.0120899	0.150126
Dek	0.967786	6.97108	0.003769	0.0894809
Alas1	0.963212	8.01554	0.00258622	0.0737073
Trappc10	0.96131	4.30099	0.0324467	0.22535
Prkdc	0.95798	4.34379	0.0294704	0.216781
Dtx4	0.957115	5.68906	0.028221	0.211805
Atad5	0.955755	4.48972	0.00464889	0.097176
Ogfrl1	0.953194	6.25233	0.000386193	0.0380673
Slfn9	0.951346	5.24235	0.012764	0.153796
Hipk2	0.9513	5.79084	0.00188663	0.0649231
Rnf20	0.950956	5.3142	0.00690695	0.113464
Kif11	0.950344	7.00261	0.00011944	0.0260819
Ap3s1-ps1	0.947973	1.79096	0.0152428	0.164767
Dbt	0.946023	3.14236	0.0281387	0.211421
Col4a3bp	0.945223	3.57403	0.0153386	0.16495
Cnnm2	0.944871	4.05826	0.0280851	0.211287
4932438A13Rik	0.944413	5.03814	0.0110779	0.144129
Kmt5a	0.940749	6.59053	0.00010959	0.0257542
Ercc6l2	0.939374	4.03559	0.0264188	0.207423
Cgas	0.939111	3.84125	0.0215206	0.188784
Ric1	0.938594	3.50499	0.0115569	0.147275
Smc1a	0.937125	7.57551	0.000376342	0.0380673
Miga2	0.933762	4.68515	0.0129873	0.155103
Pnn	0.929445	5.98633	0.00028353	0.034939
Gm15975	0.928678	1.76945	0.0331078	0.226662
Atxn7l3	0.927521	4.49807	0.00195358	0.0656554
Ctsg	0.925328	8.94217	0.0331032	0.226662
Eif4g3	0.923639	6.16594	0.00161621	0.062279
Gm12666	0.921609	0.651129	0.0337373	0.228311
Thoc2l	0.920945	3.36886	0.0477272	0.270893
Nktr	0.920825	4.30263	0.0346693	0.231521
Zfp617	0.920378	2.63175	0.0217871	0.189451
Rbm25	0.920102	6.44947	0.00051783	0.0415427
Pabpc4	0.91996	4.50592	0.00186829	0.0647888
Kif5b	0.919809	6.04977	0.0143085	0.161269
Card9	0.91743	2.66475	0.0159103	0.166961
Neurl4	0.915678	3.5556	0.0394747	0.247103
Man2a1	0.915432	3.89242	0.0144115	0.161586
Slf2	0.913838	5.63107	0.00732638	0.1172
Mcpt8	0.9124	4.39976	0.0262709	0.207101
Naa15	0.911593	6.15355	0.00181868	0.0641121
Ccp110	0.910008	3.1138	0.0124558	0.152205
Cep295	0.904024	3.34557	0.0447286	0.262872
Ccdc93	0.903657	4.22092	0.0059485	0.105169
Hdlbp	0.903542	7.58485	0.000137068	0.0268716
Cebpz	0.901907	5.72842	0.00477416	0.0978867
Lrrc20	0.900111	3.36571	0.0167479	0.170686
Slx4	0.899079	3.8068	0.00429909	0.0954068
Lrmda	0.89803	3.79594	0.00309115	0.0799928
Cask	0.897556	3.81995	0.0167347	0.170686
Gm5844	0.896614	3.32779	0.00518387	0.101627
Drc7	0.896548	3.28437	0.0195592	0.181386
Gm7198	0.89487	1.30722	0.0303036	0.218781
Sec22c	0.892876	4.07548	0.0453424	0.26463
Cdk11b	0.890908	5.22033	0.000716594	0.0476148
Gm6368	0.890104	2.78248	0.0125966	0.152896
Wapl	0.889954	6.74777	0.000791298	0.0478181
Baz1b	0.888404	6.66302	0.000449055	0.0387355
Cspp1	0.888336	3.46206	0.00458124	0.0970159
Nefh	0.887591	4.95118	0.0212171	0.18769
Gm7289	0.886648	0.998559	0.0269477	0.208538
Rreb1	0.885839	6.32671	0.000611371	0.0452995
Gm12346	0.885757	3.86777	0.00416384	0.0945191
Gm6493	0.885137	1.32282	0.0477283	0.270893
Slc25a43	0.883975	2.07945	0.0277305	0.210224
Gadd45b	0.883905	3.11926	0.046378	0.268254
Eif2s3y	0.883349	4.23939	0.00391498	0.091272
Top2a	0.882872	8.30081	0.000194134	0.0286305
Dync1h1	0.882846	6.78113	0.00400909	0.0929636
Ddx10	0.882745	5.73442	0.00513672	0.101472
Zc3h7a	0.882215	5.14795	0.00262925	0.0741838
Tent5a	0.881802	5.78851	0.00201152	0.0665835
Gtf2h1	0.88178	5.53019	0.00118661	0.056865
Adgrl1	0.881249	2.31381	0.0411461	0.251527
Slc28a2	0.879729	6.82352	0.000850429	0.0482618
Smarca5	0.879434	7.61044	0.000818916	0.0478181
Serpine2	0.877621	4.77575	0.0384077	0.244085
Atg9b	0.877175	2.28315	0.0155797	0.165261
Chd1	0.876823	6.08503	0.0120781	0.150123
Clip1	0.876307	6.27516	0.0166424	0.170324
Rab27b	0.876007	3.97709	0.014819	0.162918
Mga	0.876001	5.31657	0.00152585	0.06153
Fbxw7	0.87588	3.66347	0.0383715	0.244085
Lyar	0.872861	6.43605	0.00262151	0.0741838
Rsrc2	0.871979	5.1919	0.0109138	0.143652
Lbh	0.87157	3.14915	0.0185954	0.177827
Rc3h1	0.869833	4.12576	0.00621077	0.107148
Matn2	0.86812	2.39061	0.0254675	0.203961
Camta2	0.867396	5.23499	0.00509573	0.101064
Tubgcp4	0.866231	4.45923	0.0226106	0.193491
Prpf38b	0.864772	6.06122	0.000843128	0.0480583
Rab4a	0.863948	4.41944	0.0146975	0.162715
Mfhas1	0.858357	3.50337	0.0390558	0.245725
Zeb2	0.8583	6.43635	0.0448639	0.263341
Golga2	0.85801	5.09687	0.00857786	0.127523
Tbc1d2b	0.855905	6.51292	0.000572271	0.0436989
Dnajc2	0.855284	6.15455	0.00876926	0.128646
Cep76	0.852873	4.39687	0.00545351	0.102331
Zfp518a	0.851754	4.05984	0.0340051	0.229402
Tcof1	0.850389	7.66963	0.000317139	0.0353746
Bub1	0.847537	5.67641	0.00105065	0.0520859
Ubn2	0.843947	4.40711	0.0180814	0.176195
Chd6	0.843067	4.10674	0.0256738	0.20435
Zhx1	0.840834	5.83043	0.00447039	0.0966243
Wwp1	0.840486	4.0229	0.00826079	0.12516
Piezo1	0.840029	6.70632	0.000180762	0.0283115
Aff4	0.839214	5.41656	0.00172517	0.0632351
Eme1	0.838465	4.67823	0.0113185	0.146157
Dzip3	0.838365	3.53296	0.0137127	0.158365
Rock2	0.836829	5.39136	0.00406929	0.0931904
Tada2b	0.836495	4.08515	0.04069	0.25067
Klf13	0.836209	6.61185	0.000337056	0.0365374
Bbx	0.835725	5.70246	0.00559448	0.102822
Tut7	0.835472	6.0058	0.000818167	0.0478181
Ddx21	0.832276	6.27881	0.000901617	0.0490592
Hmga1	0.831754	6.99687	0.000357001	0.0366879
E2f8	0.830338	5.79751	0.00703334	0.11476
Golim4	0.828421	5.04214	0.0154502	0.16495
Gpc1	0.826963	6.55984	0.0125011	0.152205
Nop14	0.825419	5.70631	0.00302592	0.0790958
Gtse1	0.823586	5.19806	0.0252466	0.203403
Ice2	0.822978	4.86296	0.0106034	0.142031
Zfp236	0.822922	3.65986	0.0326567	0.225585
Zfp407	0.82197	4.33246	0.0276504	0.210107
Gm13140	0.820407	1.53094	0.0435674	0.259951
Dock10	0.820273	7.38782	0.00830391	0.125666
Kidins220	0.817879	5.87494	0.0215185	0.188784
Aggf1	0.816905	5.98989	0.00210283	0.0671625
Pcnt	0.814953	6.18923	0.00149717	0.06153
Rnps1	0.814784	7.20827	8.26071e-05	0.0257542
Kif20a	0.813339	6.7478	0.000174777	0.0283115
Pitrm1	0.812579	7.36698	0.000183161	0.0283115
2610005L07Rik	0.811263	2.26383	0.0407298	0.25067
Baz1a	0.810855	6.32085	0.00368376	0.0882669
Metap2	0.81004	7.97333	0.00031339	0.0353746
Ccdc191	0.807044	2.95578	0.0413374	0.252095
Slc16a6	0.805894	3.8814	0.0311188	0.2216
Scaf11	0.805338	6.3726	0.000123428	0.0261809
Snx13	0.804937	4.63638	0.0326687	0.225585
Creb3l2	0.804209	4.29024	0.0457792	0.266154
Aff1	0.804061	5.68061	0.0321766	0.22468
Kmt2e	0.802882	6.49404	0.0173562	0.173548
Odr4	0.801807	4.66853	0.0383929	0.244085
Cd3eap	0.801099	4.35358	0.00595849	0.10518
Exoc4	0.799822	5.59098	0.0242859	0.201046
Oaf	0.796956	4.63955	0.0181603	0.176195
Anln	0.794166	5.31458	0.0288269	0.21424
Cers6	0.792812	5.14341	0.0349266	0.232228
Ubxn2a	0.792652	4.6419	0.0164478	0.169712
Asap1	0.791908	6.87391	0.000291837	0.0350995
Zfp800	0.789466	4.57592	0.0119722	0.14967
Hmgxb4	0.78821	4.09519	0.00541883	0.102331
Bicd2	0.786191	5.7647	0.0109524	0.143652
Nolc1	0.783283	7.43722	0.00037688	0.0380673
Rbm27	0.782435	4.93024	0.00324233	0.0822599
Dicer1	0.781537	5.03921	0.00366865	0.088068
Hyou1	0.78033	5.75132	0.0337858	0.228311
Edem3	0.78006	5.49343	0.0416703	0.253371
Gab2	0.77999	5.15593	0.0299921	0.218341
Zzz3	0.779191	5.81108	0.00211781	0.0671625
Fkbp5	0.779072	7.21823	0.0183929	0.177242
Golm1	0.777834	5.57217	0.00160113	0.062279
Flnb	0.777315	6.36175	0.0264967	0.207531
Ssb	0.776845	6.61889	0.00483129	0.0979808
Bcorl1	0.775859	2.18608	0.0417892	0.253736
Agtpbp1	0.774613	4.40713	0.00777767	0.120956
Smc3	0.773533	7.20192	0.00158503	0.062279
Sos2	0.77343	5.12525	0.0199269	0.182254
Dpp9	0.773306	6.33323	0.00167842	0.0631923
Tlk1	0.772948	5.07074	0.0217677	0.18941
Slk	0.772185	6.52251	0.00195217	0.0656554
Xylt1	0.77099	3.72885	0.024752	0.20206
Odf2	0.770324	6.39622	0.00155263	0.0620047
Rbm19	0.770182	4.52981	0.00297611	0.0787481
Rexo1	0.769023	5.79869	0.00842809	0.12665
Rbm28	0.767782	5.26696	0.00451752	0.0966243
Magt1	0.765591	5.97935	0.000730413	0.0476148
Nbn	0.763747	5.41429	0.00734113	0.1172
Kctd13	0.762668	4.69928	0.0118122	0.14871
Ttll5	0.762308	4.50965	0.0277341	0.210224
Dhx9	0.760228	4.45671	0.00858855	0.127523
Rbbp6	0.758923	5.61743	0.00997303	0.138232
Sbno1	0.756617	6.34808	0.00029297	0.0350995
Ralbp1	0.755309	6.16945	0.0064062	0.109209
Emsy	0.754826	4.78656	0.0109617	0.143652
Hspa5	0.75479	10.1291	0.000759965	0.0476148
Zfp180	0.754163	5.21326	0.00985104	0.137832
Hsp90aa1	0.754062	8.26021	0.000100593	0.0257542
Snupn	0.753788	3.7085	0.0142334	0.161069
Fcgr3	0.753497	6.22209	0.0202543	0.183296
Rtf1	0.752974	5.19064	0.00577599	0.103876
Ankrd44	0.752117	5.14418	0.00303349	0.0791337
Ddx19b	0.751368	4.42917	0.00451191	0.0966243
Zcchc9	0.750019	3.7212	0.0296922	0.217489
Cst7	0.74942	6.31909	0.0147386	0.162715
Ube2c	0.748534	6.69093	0.00381258	0.0901845
Sgo1	0.747992	5.28835	0.00521366	0.101873
Aatk	0.747595	4.06842	0.0446204	0.262668
Eif3a	0.746227	7.81503	0.00408748	0.0934415
Mia2	0.745606	6.21781	0.00337983	0.0844239
Zmynd8	0.744629	6.34856	0.000886214	0.0490592
Lin54	0.744002	5.16028	0.0264783	0.207512
Zc3h13	0.743242	5.35924	0.0199954	0.182254
Smcr8	0.741072	4.71822	0.0314785	0.222946
Smg1	0.739241	4.55982	0.0114699	0.146869
Rb1cc1	0.73829	5.47812	0.0477906	0.270893
Kat6a	0.736273	4.57042	0.0356956	0.235341
Zcchc2	0.73623	5.57141	0.0147175	0.162715
Ppfia1	0.735275	6.10828	0.00459477	0.0971434
Sltm	0.73459	5.37824	0.0060192	0.105675
Prtn3	0.73295	9.14693	0.0255785	0.203961
Kif23	0.732622	6.01667	0.00211028	0.0671625
AI506816	0.731598	7.85938	0.00994731	0.138232
Urb1	0.730221	4.98231	0.0420664	0.25494
Psip1	0.728412	6.82191	0.00331747	0.0831875
Arid4b	0.72826	4.62528	0.0248672	0.202351
Mbtd1	0.727862	4.924	0.0156973	0.165675
Mospd3	0.727553	7.52477	0.000183527	0.0283115
N6amt1	0.727214	3.98486	0.0191253	0.179278
Zfp704	0.725835	5.77643	0.01499	0.163814
U2surp	0.725523	6.6402	0.0121678	0.150488
Tex2	0.723494	6.55623	0.00145894	0.060556
Pcf11	0.722592	4.38734	0.0360683	0.235701
Rps15a-ps7	0.721703	2.89591	0.0350507	0.232455
Kmt2d	0.720774	5.50453	0.0316021	0.223024
Tnpo1	0.718544	6.44143	0.000879984	0.0490592
Trim33	0.717236	3.92258	0.0196225	0.181386
Snapc3	0.716383	3.93897	0.0303415	0.218781
Brpf1	0.716144	6.17752	0.0131294	0.155855
Mphosph8	0.715843	3.71254	0.0398341	0.248153
Nudc-ps1	0.714904	3.22271	0.0125774	0.152896
Eif4ebp2	0.714858	5.10038	0.0153397	0.16495
Tmem184c	0.714743	4.26645	0.0460387	0.267008
Ppm1f	0.714577	6.38896	0.016822	0.170991
Ide	0.714538	8.04855	0.000158207	0.0276626
Tmem131	0.714313	5.86833	0.00055175	0.0427001
Gstm2-ps1	0.713748	2.8988	0.0157904	0.165973
Septin8	0.712913	5.40801	0.0388736	0.245239
Dhx40	0.712838	4.67165	0.00587426	0.104499
Tmed5	0.711811	5.44158	0.0274512	0.210009
Gm15484	0.708141	1.69114	0.0484033	0.272616
Tpx2	0.708034	7.11851	0.00015117	0.0275491
Kif16b	0.705913	5.58571	0.00157504	0.062279
Myo5a	0.705282	5.73954	0.0310041	0.221275
Wdr62	0.705009	5.44982	0.0138936	0.159379
Arfgef2	0.704791	5.58861	0.0472052	0.269545
Ccdc174	0.701421	3.96446	0.0197095	0.181616
Zfp955a	0.701213	3.79573	0.0215961	0.189156
Prc1	0.699944	6.45263	0.000741784	0.0476148
Zc3h15	0.699447	5.7359	0.0187694	0.178178
Emilin2	0.69893	7.19378	0.00483884	0.0979808
Phf20l1	0.698782	5.00813	0.0157618	0.165806
Usp2	0.697436	2.81992	0.0268767	0.208418
Gm13237	0.693464	1.98486	0.035946	0.235616
Marchf8	0.692971	5.01432	0.019909	0.182254
Ankhd1	0.692456	6.25775	0.00345353	0.0854401
Ltv1	0.692255	6.18981	0.00343107	0.0850472
Ppp3ca	0.690164	6.41629	0.00868411	0.128111
Cpox	0.689626	5.80555	0.010438	0.141124
Fkbp11	0.68956	4.07095	0.0237732	0.198809
Dus2	0.689289	3.98977	0.0392332	0.246023
Ccdc137	0.688262	4.62346	0.0387924	0.244966
Rnf214	0.688018	4.20433	0.0302775	0.218781
Larp1	0.687327	7.99802	0.00169711	0.0631923
Srgap2	0.686883	5.30661	0.0322869	0.224844
Zfp646	0.684674	5.68193	0.00369937	0.0884771
Lrp5	0.683367	3.51899	0.0488021	0.273473
Mysm1	0.68334	4.06774	0.0104715	0.141136
Rbm26	0.68282	5.0964	0.0117194	0.148373
Arhgap11a	0.682683	6.6262	0.0143324	0.161399
Htatsf1	0.681876	5.99383	0.00204065	0.0668454
Map11	0.681547	4.26773	0.00973554	0.137008
Nsrp1	0.681334	4.73232	0.00884732	0.128769
Atad2	0.681198	7.19624	0.00166261	0.0631923
Arpc1b	0.680651	9.82982	0.00132245	0.059414
Mettl6	0.679355	5.49628	0.00104991	0.0520859
Dnm1l	0.678876	6.35235	0.00255895	0.0732528
Eif3j1	0.678853	5.08016	0.0037198	0.0886941
Strbp	0.67746	6.13108	0.00261025	0.0741022
Prpf40a	0.676641	7.0117	0.0045332	0.0966243
Asxl2	0.675579	5.22393	0.00426846	0.0953393
Stip1	0.675406	8.30196	0.000874457	0.0490592
Zfp14	0.675394	2.12682	0.0358153	0.235341
Pacsin2	0.675027	7.30647	0.000183798	0.0283115
Ythdc1	0.670815	5.17415	0.0275667	0.210107
Plxnc1	0.670762	6.60852	0.0167665	0.170686
Anp32b-ps1	0.670391	3.17201	0.0207155	0.185283
Scrn3	0.670247	3.66393	0.0297995	0.217839
Zfc3h1	0.670202	3.98231	0.0462656	0.267963
Cdan1	0.669994	5.15698	0.0196637	0.181605
Zfp35	0.668917	5.84679	0.0142658	0.161069
Stim2	0.667967	4.85386	0.0127658	0.153796
Cep95	0.667749	2.87257	0.0266637	0.208209
Tmem50b	0.667267	5.2665	0.0102987	0.140653
Tnrc18	0.667235	5.71113	0.0144855	0.161944
Rsrc1	0.66523	5.43885	0.0105141	0.141416
Ahctf1	0.665026	6.26654	0.0148358	0.162918
Hectd1	0.664696	6.44619	0.00426859	0.0953393
Wbp4	0.664334	4.97688	0.0194045	0.180424
Rmdn3	0.663794	4.98693	0.0176315	0.174246
Ccdc34	0.663243	4.3057	0.0244251	0.201554
Mafg	0.662617	5.3951	0.0132744	0.156256
Ubxn4	0.662115	6.45209	0.0143929	0.161586
Arid2	0.662011	6.46337	0.00646544	0.109757
Dhx29	0.658861	5.28096	0.0422576	0.255859
Clpb	0.65754	6.59623	0.0217162	0.189216
Ankrd11	0.657047	6.96907	0.00151215	0.06153
Usp24	0.656863	5.83122	0.0157431	0.165744
Ybx1-ps2	0.655084	3.33393	0.0285521	0.213558
Pitpnc1	0.65413	5.92716	0.00217641	0.0681855
Zwilch	0.652999	3.78016	0.015335	0.16495
Lpgat1	0.6525	4.65477	0.0113733	0.146719
Brd7	0.650599	6.2379	0.00636372	0.108775
9430015G10Rik	0.650008	4.47704	0.037247	0.239651
Lrrc28	0.649021	4.41549	0.0126495	0.152964
2700049A03Rik	0.648119	4.78009	0.0351456	0.232727
Tnks	0.646763	5.84541	0.00203539	0.0668454
Ep400	0.646454	6.0797	0.00741344	0.117986
Gfm2	0.646231	5.12988	0.00899525	0.130479
Tbrg4	0.64507	4.94732	0.0277318	0.210224
Cdc27	0.644667	5.72677	0.00436231	0.0956677
2610035D17Rik	0.644247	4.63464	0.00677974	0.112293
Nedd9	0.641656	4.46046	0.0470896	0.269395
Vps13b	0.639619	4.66833	0.0209304	0.186177
Gm8141	0.639607	3.34852	0.019626	0.181386
Cdca8	0.638669	7.66183	0.00175226	0.063331
Acap3	0.638228	5.40947	0.0175218	0.174246
4933404O12Rik	0.637519	4.98232	0.0148928	0.163027
Pgs1	0.636909	5.99662	0.0062861	0.108258
Rcor1	0.636569	6.65066	0.00182342	0.0641121
Ero1l	0.63645	5.744	0.00406088	0.0931627
Lrpprc	0.63598	7.21638	0.00082627	0.0478181
Smarca4	0.635612	7.90801	0.00475645	0.0978867
Thoc2	0.635595	5.72635	0.0300597	0.218613
Ccdc47	0.634985	6.91086	0.00065661	0.0457462
Eloa	0.634362	6.51339	0.00165556	0.0631897
Trip12	0.633719	6.70476	0.0040413	0.0930768
Tmem234	0.632188	6.55461	0.00144333	0.0604379
Ap3s1	0.631115	6.7347	0.0170692	0.172049
Gm8995	0.629913	5.71363	0.0493124	0.274536
Frs2	0.629133	5.4822	0.00556971	0.102622
Rabl6	0.627254	6.31627	0.00550445	0.102331
Gm4739	0.627019	3.6514	0.0348345	0.231928
Fam118b	0.626819	4.76228	0.0242016	0.200714
Baz2b	0.6268	5.65652	0.0389669	0.245588
Rprd1a	0.625465	4.03331	0.0272145	0.209367
Brd3	0.624241	6.82683	0.0191372	0.179278
Pdcd11	0.623911	6.22077	0.00443338	0.0963435
Mdm4	0.623435	5.31617	0.0142345	0.161069
Mycbp2	0.623385	5.65813	0.00719741	0.116494
Phtf1	0.623376	5.63076	0.0193756	0.18036
Guf1	0.621286	4.66979	0.0090857	0.130767
Phactr2	0.621113	5.45141	0.0326419	0.225585
Ptpn11	0.620096	4.99891	0.0249592	0.202395
Gm5637	0.620093	5.14049	0.0402358	0.249129
Ap1ar	0.619571	6.05043	0.00946282	0.134401
R3hdm2	0.619154	5.24078	0.0180523	0.176195
Pdzd8	0.618391	5.94252	0.0189204	0.178791
Trappc8	0.617531	5.98833	0.00597148	0.105266
Gripap1	0.616068	5.33435	0.00916274	0.131438
Ylpm1	0.614133	5.32808	0.0104611	0.141136
Taf12	0.613645	5.38725	0.0184302	0.177356
Dffa	0.613502	5.22846	0.0475511	0.270652
Senp6	0.612709	5.73231	0.0214148	0.188494
Sec63	0.612703	5.69489	0.0302455	0.218781
Manf	0.612182	6.6984	0.00428102	0.0953393
Topbp1	0.610713	7.1945	0.00572146	0.103683
Ppip5k2	0.608198	6.55791	0.0136013	0.158166
Sptan1	0.608	7.00846	0.0175261	0.174246
Spen	0.607514	5.17771	0.00809973	0.124321
Jdp2	0.607502	5.0576	0.00921319	0.131709
Wdr48	0.607217	6.29633	0.0128388	0.154101
Phf2	0.606547	5.51145	0.0228573	0.194716
Mlxip	0.606434	6.06761	0.0125044	0.152205
Cdk6	0.606259	7.87809	0.0287028	0.214058
Gm9800	0.603546	5.53893	0.00870049	0.128111
Rbm6	0.602676	5.9892	0.0318673	0.223728
Slc7a1	0.602609	5.09183	0.0139766	0.159897
Mgat5	0.601786	4.86683	0.0139663	0.159897
Ctnna1	0.601084	6.70435	0.00486808	0.0982654
Srsf4	0.597887	5.33793	0.0177972	0.175117
Gng12	0.596638	7.00334	0.00144824	0.0604476
Dlgap5	0.59662	4.88614	0.0489488	0.27361
Itga4	0.596374	5.53823	0.0390728	0.245725
Psme4	0.596263	5.01927	0.0200967	0.1828
Ddx11	0.595623	5.53501	0.0352805	0.233382
Slc25a38	0.595559	4.27047	0.0245276	0.201976
Larp7	0.595379	5.68392	0.0171218	0.172136
Knop1	0.595017	5.67235	0.0293658	0.216504
Stxbp5	0.59495	6.67183	0.0179102	0.175307
Atf6	0.594896	5.37177	0.0397749	0.248153
Ints6	0.594213	5.90595	0.0165069	0.169915
Srp72	0.593909	6.52585	0.00851069	0.127306
Cfdp1	0.593592	6.0637	0.00353532	0.0866354
Safb	0.592224	6.7949	0.00116897	0.0564377
Fyb	0.592072	5.63396	0.0358495	0.235341
Cep97	0.591425	5.18369	0.0106736	0.142031
Usp15	0.591381	7.14778	0.012633	0.152964
Plk4	0.590626	5.78527	0.00603948	0.105744
Lrrfip1	0.588582	6.91514	0.0246636	0.201976
E2f4	0.588121	7.51343	0.00264996	0.0742161
Fnbp4	0.587308	5.16699	0.021652	0.189156
Zfp91	0.586255	4.00799	0.0468788	0.269148

## Sheet: Down_2
Gene_Symbol	Fold_Change	Average_Expression	p-Value	Adjusted_ p-Value
Igkc	-6.39009	0.496244	0.0073628	0.068512
Xist	-6.07414	1.22478	2.35011e-08	0.00030528
Abca5	-5.38757	-0.183738	0.00269559	0.0388631
Pfn4	-5.31385	-0.916452	0.000529494	0.0168996
Cx3cl1	-5.07822	-0.503745	8.16286e-05	0.0071877
Pdgfd	-5.04253	-0.942019	0.00198287	0.0334513
Tro	-4.80479	-0.743374	0.00609088	0.0615245
Zfp691	-4.79496	-0.572335	0.00356523	0.0460362
Mill2	-4.32247	-0.777013	7.53709e-06	0.00264496
Cd276	-4.13141	1.02782	3.90187e-06	0.00239278
Bpifb5	-3.96137	-0.602152	4.0392e-05	0.005566
Scube3	-3.92734	0.353218	0.00427405	0.0502898
Gm37844	-3.91657	-2.1884	0.0262527	0.142211
Tns2	-3.89784	-0.0652406	0.0024628	0.0371586
9230112E08Rik	-3.77697	-0.281004	0.00578355	0.0598632
Pls1	-3.7586	0.40443	0.000126991	0.00882149
Epb41l5	-3.63055	1.02342	0.0409534	0.18009
B3gnt9	-3.56581	-1.06005	0.0205737	0.123805
Olfml3	-3.55957	-0.140878	0.00699188	0.0665607
Gfpt2	-3.55548	-0.552645	0.0049971	0.0551039
Ndn	-3.53754	0.262709	0.000354722	0.0145126
Obscn	-3.49504	0.614214	0.000179719	0.010516
Gm19696	-3.35911	0.305038	0.00194712	0.0331061
Plekha6	-3.29245	0.584175	0.00277417	0.0395298
Fam169a	-3.21945	0.801749	0.000838971	0.0217965
Mxra8	-3.13155	0.530102	0.00138231	0.0279256
Plcl1	-3.10804	-0.25013	0.00105968	0.0244817
Fstl1	-3.03333	-0.100954	0.00246954	0.0371586
Dlg2	-2.96241	0.0354302	0.00993983	0.0819279
Pygm	-2.9325	0.972777	0.000431719	0.0153765
Cdkn1c	-2.91727	1.41021	5.32808e-06	0.00246182
P3h4	-2.85797	-0.186755	0.00104876	0.0243276
Islr	-2.85001	1.00732	0.00198014	0.0334487
Bcl2l14	-2.84789	-0.19635	0.00029574	0.0131647
Arhgef17	-2.84537	0.0246758	0.00376003	0.0470174
Aipl1	-2.84431	-1.07272	0.00892046	0.0769434
Plod2	-2.8361	1.33556	0.00395855	0.0482841
Gpr45	-2.75002	0.788408	5.24073e-05	0.00568606
Ldlr	-2.73239	6.38494	4.8408e-07	0.00158093
Fzd8	-2.73082	1.98826	0.000616548	0.0184306
Fhl1	-2.65417	1.62987	0.000432057	0.0153765
Klhdc8b	-2.63271	1.46627	0.000234408	0.0117777
Irf6	-2.62249	2.70538	1.91714e-06	0.00220735
Mkrn3	-2.59229	-1.21985	0.00996675	0.0820332
Lhcgr	-2.57479	0.701412	0.00019178	0.0110195
Apbb1	-2.57318	0.63785	0.00488305	0.0543232
Trim30b	-2.56919	0.213111	0.000167285	0.0101071
Trim30b	-2.56919	0.213111	0.000167285	0.0101071
Agmo	-2.56872	0.646958	0.000760514	0.0208823
Jam2	-2.52678	-0.187566	0.0388263	0.173855
Slc9b2	-2.52491	-0.736505	0.00146327	0.0284889
Gimap8	-2.46407	0.710041	0.00200326	0.0337077
D830025C05Rik	-2.45984	-0.202752	0.00041053	0.0149136
Myo5c	-2.44967	0.553279	0.00309664	0.0419889
Zswim5	-2.44098	-0.104109	0.0291502	0.150441
Npdc1	-2.40639	3.11639	1.19477e-05	0.00310592
Vnn1	-2.40378	-0.860942	0.0130427	0.0956384
Dsel	-2.3714	0.843467	0.000239291	0.011782
Hsd17b7	-2.32504	3.0669	4.91848e-06	0.00239278
Chrnb1	-2.32294	1.09233	0.000202339	0.0110195
Pim1	-2.321	4.44383	0.00230729	0.0362415
Nkx2-3	-2.31932	1.8868	0.000349989	0.0144789
Triqk	-2.28785	0.302247	0.00270977	0.0389048
Lig4	-2.23376	-0.196199	0.0306955	0.154849
Trpc6	-2.19381	1.50452	0.0113622	0.0881694
Aspa	-2.1662	2.17828	0.00105992	0.0244817
Zbtb33	-2.15859	-0.17264	0.000763128	0.0208823
Gng7	-2.15206	0.906496	0.000301693	0.0132847
Ccr7	-2.13708	-0.0898182	0.00340487	0.0448357
Slc16a11	-2.13525	2.86228	0.000414768	0.0150079
Arsg	-2.10611	0.539721	0.0244882	0.136496
St3gal6	-2.09824	1.3456	0.000628148	0.0184612
Ackr1	-2.08353	-1.14755	0.0270714	0.145073
Foxa3	-2.07689	0.260928	0.0014492	0.0284889
Mcf2	-2.05162	1.37124	0.0343193	0.164992
Bgn	-2.04458	1.30629	0.00230729	0.0362415
Slc25a40	-2.04159	1.08619	0.0241488	0.135853
Mfap2	-2.0189	-1.0573	0.0382474	0.17222
B3gnt3	-2.01395	2.67935	4.87543e-05	0.00559049
Mapk12	-2.00545	-0.120803	0.00760379	0.0698538
Extl1	-1.96818	-0.515121	0.0224091	0.130418
Cyp2d22	-1.96108	-0.0985022	0.0230001	0.131963
Arhgef10	-1.95323	1.95383	0.00583827	0.0602376
Bcam	-1.95229	2.39921	0.000158688	0.00986005
Rhbdf1	-1.94651	1.54226	0.00291296	0.0406823
Rgmb	-1.9452	2.01007	0.00207165	0.0342376
Fam110c	-1.94476	0.129608	0.0425012	0.183597
Castor1	-1.93293	1.06112	0.0460452	0.192509
Cdcp1	-1.9315	1.06223	0.0481632	0.197612
Eps8l1	-1.92576	1.73629	0.0145101	0.101634
Nlrp10	-1.92262	2.2309	0.000110275	0.0083283
Slc16a2	-1.91705	0.907274	0.0351334	0.166342
Ltb	-1.89219	4.86457	6.08518e-07	0.00158093
Fcrl1	-1.87729	1.00518	0.0165971	0.10983
Pcdhga5	-1.87208	-0.799613	0.0412023	0.180817
D330041H03Rik	-1.86578	-0.578075	0.00274495	0.0393131
Rapgef4	-1.85901	-0.415832	0.0334841	0.162358
Camsap3	-1.84966	1.28547	0.0175707	0.113837
Ldhd	-1.84551	-0.131463	0.042049	0.182802
Robo4	-1.84425	3.36094	0.000174916	0.0103672
Zfp697	-1.84122	0.169828	0.00956247	0.0802951
Nectin4	-1.84121	2.50107	0.000485254	0.016288
H2bc6	-1.83413	0.391911	0.0084766	0.074099
Ddx4	-1.82855	0.207564	0.00605525	0.0612992
Gm42517	-1.82493	1.38283	0.00190337	0.0325755
Msmo1	-1.82079	5.54219	2.54128e-06	0.00231002
Rhoj	-1.81497	0.934141	0.00419613	0.0495976
Hgfac	-1.81126	1.03144	0.00102295	0.024206
Sgsm1	-1.80709	2.80477	0.00130113	0.0270982
Tspyl4	-1.80118	1.37454	0.00462762	0.0530095
Wdr31	-1.8003	0.802081	0.0371698	0.170756
Krtcap3	-1.79043	1.47278	0.00119994	0.0258411
Tmem220	-1.79029	-0.0321333	0.0340415	0.16402
Begain	-1.77988	-0.194062	0.0228389	0.13174
Sdc1	-1.7765	3.42318	0.00245426	0.0371363
1700066B19Rik	-1.772	0.0491485	0.0241682	0.135853
Gm9008	-1.75731	1.90522	0.00639818	0.0633479
Bbs10	-1.75212	0.165687	0.0260654	0.141685
C4b	-1.74508	1.16327	0.0128986	0.0950485
Tctn2	-1.73055	1.48697	0.00336666	0.0445712
Krt7	-1.72734	0.422296	0.0349581	0.166
Tmem231	-1.71351	3.14407	0.000159592	0.00986005
Tcf7l1	-1.71319	0.2516	0.0255121	0.140005
Klhdc9	-1.68693	0.695197	0.0106772	0.0849771
Septin4	-1.6732	1.29018	0.00725227	0.0680195
Bdh2	-1.66802	2.31482	0.00171012	0.0306406
Thnsl2	-1.66096	2.1298	0.0199318	0.121904
Aldh1l1	-1.65881	5.26071	7.96471e-07	0.00172436
2900041M22Rik	-1.65697	-0.644843	0.0301541	0.153308
Gm5111	-1.63615	1.68711	0.000471639	0.0160803
Slc22a17	-1.6305	2.17413	0.0224459	0.130458
Myo6	-1.63029	1.4595	0.0410442	0.180367
C920021L13Rik	-1.62701	-0.461562	0.035995	0.168264
Zfp831	-1.61364	1.00113	0.0205906	0.123828
Morn1	-1.61122	1.45045	0.000636359	0.0185938
Slc16a9	-1.59742	0.856332	0.00662648	0.0642748
Cish	-1.58699	1.70542	0.00305952	0.0417127
Gm45051	-1.5862	-0.229502	0.0222399	0.129958
BC037704	-1.58104	0.891382	0.00281278	0.0399322
F11r	-1.57861	5.04267	6.07424e-07	0.00158093
Kank2	-1.56945	1.8369	0.00498663	0.0550351
Npr2	-1.569	0.929202	0.0366736	0.16957
Trib3	-1.56874	3.25253	0.00957722	0.080367
Hoxa10	-1.56527	2.92247	0.000315802	0.0136742
Gm50069	-1.56453	1.61038	0.00126808	0.0266543
Zxdb	-1.5567	1.52482	0.0196495	0.121028
Patj	-1.55615	3.17282	0.000126084	0.00882149
Lrrc56	-1.55411	2.17569	0.000365699	0.0145273
Sema4b	-1.55349	2.98825	0.00238267	0.036803
Armc3	-1.55082	1.89865	0.0082821	0.0730722
Iigp1	-1.53139	2.76974	0.000887656	0.0223493
Fah	-1.52516	2.42576	0.000494827	0.0163955
Tlr6	-1.5225	2.93175	0.000359446	0.0145202
H2ac4	-1.52187	0.491046	0.00352973	0.0456685
Insig1	-1.51869	5.18308	2.17127e-06	0.00220735
Gm16124	-1.51398	1.38129	0.00181121	0.0318439
Particl	-1.50976	1.8473	0.00983341	0.0813561
Upp1	-1.50877	1.65372	0.00381518	0.0473137
Ccdc120	-1.50268	2.18357	0.00115115	0.025487
Mageh1	-1.49206	0.749648	0.00728283	0.0682568
Plpp7	-1.48626	2.41553	0.000475134	0.0161149
Tmem53	-1.48478	0.0924206	0.0113493	0.0881694
Myl6b	-1.48099	0.513959	0.00347743	0.0452977
Cd6	-1.48084	-0.193027	0.0477876	0.196443
Cd200	-1.47374	1.60831	0.0103723	0.0837385
Perp	-1.46865	2.0668	0.00545468	0.0579365
Agpat4	-1.46521	3.11704	0.0086541	0.0751952
Gm43568	-1.45832	2.00376	0.00174537	0.0311006
Fdft1	-1.44726	4.67677	0.000135964	0.00905727
Bco2	-1.44483	-0.292647	0.0174727	0.113536
Agap2	-1.44293	1.17173	0.0274602	0.146215
Ptk2	-1.44007	2.10009	0.0353596	0.166904
Ggact	-1.43764	2.00033	0.000897014	0.0223967
Tnni2	-1.43462	0.661875	0.0298008	0.152227
Itm2a	-1.43289	4.96121	0.000160431	0.00986005
Fzd6	-1.43205	3.94056	0.00013736	0.00905742
Nradd	-1.42307	1.65708	0.0329885	0.161088
H2-Aa	-1.41956	5.58283	0.000143299	0.00935403
Gm11423	-1.4193	1.65264	0.0105147	0.0845213
Rbakdn	-1.41093	-0.52076	0.0272082	0.145439
Slc2a9	-1.41084	2.22475	0.0165728	0.109725
Tspan6	-1.40525	4.15381	1.74058e-05	0.0034707
Col16a1	-1.40446	3.4882	0.0313129	0.156866
Traf1	-1.40267	1.88854	0.0048863	0.0543232
Esam	-1.40054	4.04312	0.00874908	0.0758176
Dhcr24	-1.3993	3.60671	0.00109769	0.0249282
H2-Eb1	-1.39738	4.7901	0.000576631	0.0178769
Pkia	-1.39664	1.5159	0.0184236	0.116458
Cep170b	-1.39626	4.69861	0.000645772	0.0187245
BC147527	-1.39521	3.24568	0.00296307	0.0410345
Tox	-1.39143	2.87363	0.00226171	0.0357851
Rps13-ps2	-1.38793	2.57573	0.00153679	0.0289738
Syt3	-1.38643	0.888184	0.00750638	0.069302
Abcc3	-1.38439	3.46925	0.00523025	0.0564763
Art5	-1.37665	0.0167113	0.0369533	0.170234
H1f1	-1.37586	1.44296	0.022109	0.129426
0610009L18Rik	-1.37097	1.78465	0.00619068	0.062194
Gprasp2	-1.36792	1.48509	0.0116735	0.0895831
Rbp1	-1.3645	4.15249	4.41902e-05	0.005566
Rasl12	-1.36184	1.21003	0.00775035	0.0706505
Rxra	-1.36048	3.88254	0.00370164	0.0466991
Gm6781	-1.35776	0.339623	0.00904171	0.0775212
Ctsw	-1.35712	2.84602	0.00851549	0.0742889
Clic5	-1.35378	1.74139	0.0261126	0.141748
Il18	-1.35318	2.82324	0.00299311	0.0412307
H3c8	-1.35029	-0.67163	0.0458829	0.192202
Adgrd1	-1.34998	2.02925	0.0235467	0.133498
Nanos3	-1.34953	-0.118023	0.02055	0.123774
Gm3362	-1.34823	1.03393	0.0061501	0.0619782
Ly6a	-1.34611	4.12941	0.000125703	0.00882149
Stard4	-1.34536	4.07107	0.000954578	0.0231343
Klhl4	-1.34364	1.74854	0.0394056	0.175722
Pglyrp2	-1.33706	5.51447	0.000112382	0.00834891
Gm20467	-1.33693	0.624519	0.00827547	0.0730722
Socs1	-1.32329	3.2317	0.000557747	0.0175003
Enho	-1.32243	0.176745	0.0461117	0.192663
Tcf15	-1.30301	2.53261	0.000453043	0.0156157
A930029G22Rik	-1.30252	-0.786752	0.0448151	0.189569
Mttp	-1.30151	1.39807	0.00485358	0.0542581
H4c4	-1.29421	4.97751	3.74957e-05	0.00535241
Tbxa2r	-1.29341	4.63276	0.00106295	0.0244817
H2ac8	-1.29274	5.40115	2.39108e-05	0.00431391
Gm7667	-1.29118	-0.232841	0.0137807	0.0986287
Obsl1	-1.28665	2.61565	0.0245805	0.136863
H1f3	-1.28459	2.81333	0.00627138	0.0626656
Spaca9	-1.28438	0.639028	0.0356723	0.16775
2500004C02Rik	-1.27874	1.05908	0.0223692	0.130359
F2rl3	-1.27499	6.14683	1.56246e-05	0.00344006
Cerox1	-1.27122	0.644789	0.0195003	0.12028
Scml4	-1.25895	2.83321	0.0420767	0.182802
Rab40b	-1.25847	1.66513	0.00841333	0.0736946
Rgs3	-1.25665	3.24412	0.00284889	0.0400076
Hes5	-1.25432	-0.474408	0.0435007	0.186493
CT010467.2	-1.25035	5.94645	0.000235033	0.0117777
Zcchc18	-1.24873	0.744822	0.0219017	0.128655
Lipo3	-1.24486	3.53048	0.000680037	0.0193721
Zfp963	-1.24443	1.24801	0.00566669	0.0593153
Wdr47	-1.24209	2.86324	0.00233724	0.0365353
Rps18-ps3	-1.23928	1.895	0.00277531	0.0395298
Aph1b	-1.23717	1.53367	0.0345571	0.165035
Mettl21a	-1.23622	4.16068	0.00240832	0.0369352
Smim10l2a	-1.23621	2.23369	0.0163909	0.109244
H1f5	-1.23556	5.01895	0.00672303	0.0648525
Hbb-bt	-1.2345	0.738881	0.0189839	0.118364
Hlf	-1.23024	6.3027	6.43398e-05	0.00612243
9030619P08Rik	-1.2284	4.04165	0.000117901	0.00859961
Gm13611	-1.22454	2.03772	0.00443509	0.0513933
Cyp51	-1.22365	5.97338	2.67088e-06	0.00231002
Neil1	-1.22208	3.70722	0.00337286	0.0445712
H2ac20	-1.22195	0.472019	0.0228594	0.131799
Rps27rt	-1.22142	1.93404	0.00364637	0.0463921
Ddit4	-1.21779	3.94688	0.000518782	0.016722
Tnfaip8l1	-1.21739	2.12305	0.0389093	0.174106
Smim6	-1.21477	2.42827	0.00614344	0.061959
Trim34a	-1.21162	4.05293	0.00854258	0.0744253
Traf5	-1.21114	3.39612	0.00211013	0.0346093
Dntt	-1.20835	7.18888	0.000116141	0.00857197
Dusp10	-1.20834	2.28068	0.00118428	0.0257686
Sec16b	-1.20533	0.621085	0.0451833	0.190009
Sgce	-1.20468	3.7924	0.00147031	0.0284889
Cd74	-1.20357	7.18288	0.000567333	0.0177582
Ndrg2	-1.20247	3.70424	0.00247399	0.0371586
4933406P04Rik	-1.19766	0.158875	0.0393857	0.175694
Fkbp7	-1.19714	0.831533	0.0275432	0.146245
Gm32687	-1.19541	0.253811	0.0231773	0.132428
Fmo5	-1.19159	3.67116	0.000803632	0.0213917
Acss2	-1.19113	5.9182	0.000198384	0.0110195
Mir6236	-1.18959	7.34587	0.0243344	0.136136
Lpar2	-1.18812	0.0275222	0.0446769	0.189454
Ak1	-1.18773	3.8831	0.00158456	0.0293212
Haghl	-1.18754	4.99567	0.000112476	0.00834891
Pdzk1ip1	-1.18706	5.68893	2.48008e-05	0.00441319
Mmp15	-1.18402	2.06431	0.0333692	0.161992
Cabcoco1	-1.184	1.22141	0.0149305	0.103383
H1f4	-1.18388	5.05411	4.20502e-05	0.005566
Art4	-1.17983	3.84319	0.0176016	0.113981
Cyp2j6	-1.17708	3.95185	0.000409988	0.0149136
Gpx7	-1.17637	1.85284	0.0177415	0.11443
Mmp2	-1.17195	3.53363	0.00171372	0.0306629
Leng9	-1.17172	1.84202	0.0165635	0.109725
Oxsm	-1.17123	3.12249	0.0161634	0.10834
Rad9b	-1.17118	-0.369224	0.0389755	0.174163
Gm4013	-1.17023	1.37508	0.0130658	0.0956384
Clu	-1.16981	2.42505	0.0201832	0.122491
Gm11110	-1.16943	0.393594	0.0171042	0.111822
Sh3pxd2b	-1.16849	2.85101	0.0174591	0.113536
Sesn2	-1.16535	4.6675	0.00779963	0.0709504
CT010467.1	-1.16018	8.80874	0.000748719	0.0207818
Myct1	-1.1555	5.57342	5.45834e-05	0.00571902
Pnck	-1.1532	4.61506	0.00192901	0.0328909
Fndc10	-1.14939	3.72833	0.0013686	0.0278145
S100a6	-1.14826	4.69426	0.000256475	0.012115
Hist1h2ao	-1.14799	6.00019	9.28947e-06	0.0027878
Fcgrt	-1.1452	4.35333	0.000160918	0.00986005
Mycn	-1.14515	6.41249	3.16848e-05	0.00502678
Gstm7	-1.14452	2.75516	0.00422043	0.0498294
Gucy1a1	-1.14323	2.47748	0.0363401	0.168773
Neu3	-1.14251	3.04542	0.0054689	0.0579921
Col4a2	-1.14039	3.96725	0.03994	0.17708
H2-Ab1	-1.13883	7.63003	5.6855e-06	0.00246182
Myl10	-1.13735	2.59324	0.0303633	0.153992
Spint1	-1.13189	1.63021	0.0152031	0.104657
Map1lc3a	-1.1317	3.79127	0.00109348	0.0249208
Angptl6	-1.12967	1.38318	0.0287607	0.14956
Gm34220	-1.12893	0.985786	0.0289614	0.149884
Nrarp	-1.12893	0.678148	0.00991645	0.0817871
Mpl	-1.12362	6.65343	0.0135568	0.0975885
Slc27a6	-1.12183	2.86726	0.00365554	0.0464633
Zfp775	-1.12143	2.78355	0.0104775	0.0844312
Dkkl1	-1.11962	4.76544	0.00063843	0.0185938
Mmrn1	-1.11808	4.57863	0.040529	0.178586
Il1r1	-1.11668	4.97279	0.000447791	0.0155801
Ppm1k	-1.11635	2.79895	0.0152165	0.104694
Cirbp	-1.1161	6.37104	7.58247e-06	0.00264496
9030025P20Rik	-1.11442	1.26599	0.0213249	0.126713
Rsph9	-1.11383	0.667538	0.0385669	0.172979
Hhat	-1.11024	3.38264	0.0190854	0.118735
Tesmin	-1.10806	3.06373	0.00146161	0.0284889
Alpk3	-1.10805	1.42375	0.039978	0.177101
Rps2-ps10	-1.10706	1.53565	0.0134835	0.09736
Hacl1	-1.10162	-0.508569	0.0498375	0.201679
Gstt3	-1.10018	3.40535	0.00121244	0.0260324
Herc3	-1.10003	3.75204	0.0180026	0.115256
Mamdc2	-1.09514	3.46432	0.0102445	0.0831954
Tmem246	-1.09413	2.38872	0.0393004	0.175434
Zfp867	-1.09181	2.31018	0.00524199	0.056545
9130023H24Rik	-1.09064	2.8739	0.0436647	0.186765
Carmil2	-1.0865	5.32274	0.00538963	0.0575278
Lck	-1.08645	4.52299	0.00702928	0.0666448
Dusp4	-1.08539	2.84125	0.039621	0.176199
Zfp455	-1.08491	2.70504	0.00294907	0.0409715
Pdk2	-1.07936	5.21332	0.00206808	0.0342222
Ephx1	-1.07813	2.6486	0.0281976	0.148201
Gem	-1.07653	2.78756	0.00425108	0.0500648
Bex1	-1.07551	1.49971	0.00488525	0.0543232
Snx31	-1.0726	0.391163	0.0323134	0.159547
Mvk	-1.06879	3.76106	0.00395692	0.0482841
Mvd	-1.06871	3.50548	0.0007747	0.0209653
Pcdhgb6	-1.06841	1.63829	0.049738	0.201464
Gm43362	-1.06781	1.09318	0.0106738	0.0849771
H2-Oa	-1.06725	3.69529	0.000496029	0.0163955
Lfng	-1.064	5.05067	0.000323694	0.0138772
Nckap5l	-1.06393	2.84539	0.00944757	0.0795875
Zfp467	-1.05914	4.03097	0.00101238	0.024206
Pomgnt2	-1.059	5.46373	0.0008353	0.0217884
Sytl1	-1.05822	4.49443	0.00132272	0.0273165
Gm8960	-1.0571	2.71964	0.0101172	0.0826557
Gng11	-1.05384	4.30641	0.00142882	0.0283571
H2-T10	-1.05126	3.07521	0.0235574	0.133498
Rbm12b2	-1.05106	2.5124	0.0103426	0.0836108
Hist1h2ap	-1.05051	3.12342	0.0102522	0.0831954
Procr	-1.04762	4.11812	0.00119784	0.0258411
Plpp3	-1.04717	1.3329	0.0237408	0.134026
Gm19590	-1.04659	4.74146	0.000315404	0.0136742
Rasgef1b	-1.0454	4.94873	0.000483075	0.0162699
Agbl3	-1.04438	1.23847	0.0487749	0.199077
Tob1	-1.04406	4.30305	0.000790414	0.0211265
Nupr1l	-1.04349	0.129357	0.035058	0.166269
1700096K18Rik	-1.03828	2.12563	0.0087136	0.0755605
Smagp	-1.02929	1.63906	0.0399214	0.17708
Aldoc	-1.02718	4.09709	0.00148744	0.0285032
4632427E13Rik	-1.02715	2.41291	0.00829572	0.0730722
Prcp	-1.02708	5.72197	0.00022966	0.0116081
Jup	-1.02569	5.22244	0.0016424	0.029934
Itgb4	-1.02334	1.76707	0.0290112	0.149962
Tert	-1.02312	2.0575	0.0471803	0.195244
Rpsa-ps2	-1.02289	1.5882	0.0138906	0.0992511
Gm17241	-1.02195	1.19355	0.018254	0.116064
Lrrc61	-1.02172	3.56125	0.0134059	0.0971239
Maged1	-1.02169	6.16223	8.23311e-05	0.0071877
Slc25a29	-1.02135	2.36412	0.0171256	0.111902
Tmem121	-1.02115	4.24544	0.00983914	0.0813561
H2ac11	-1.02108	0.886482	0.0231641	0.132428
H4c3	-1.01956	1.58039	0.0296368	0.151866
Gm49980	-1.01687	1.05281	0.0159257	0.107224
Nek8	-1.01605	3.61106	0.00323246	0.0434226
Insl6	-1.01563	3.61917	0.00187338	0.0323607
Lss	-1.01556	5.20194	0.00203047	0.0338174
Clstn3	-1.01487	5.88422	0.00506787	0.0555541
Camkmt	-1.01392	3.81776	0.0032937	0.0439724
Gm6204	-1.01335	5.45309	0.00716931	0.0674362
Sdc2	-1.01103	1.7297	0.0447722	0.189517
H2-T-ps	-1.00791	3.56994	0.0059276	0.0607732
Atg4d	-1.00404	4.77899	0.000150548	0.00958634
Gm5805	-1.00368	4.65014	0.00750495	0.069302
Etfbkmt	-1.00309	2.83637	0.00490742	0.054485
Acvr2a	-1.00022	2.43707	0.0322018	0.159444
Slc2a1	-0.999606	5.68902	0.000364163	0.0145273
Rps19-ps4	-0.998419	0.932097	0.0213985	0.126809
Cldn12	-0.998269	3.63636	0.000978716	0.0236517
Reep2	-0.994759	2.59878	0.0373785	0.170784
Rpl19-ps7	-0.993233	1.70979	0.0180363	0.115414
mt-Rnr2	-0.993192	7.78186	0.00257318	0.0378315
Slc16a13	-0.989448	4.03357	0.000693739	0.0197192
Pdp1	-0.986915	4.96504	0.000353881	0.0145126
Capsl	-0.986797	1.2189	0.0308696	0.155212
Rps15a-ps6	-0.984788	1.84918	0.0100244	0.0822533
Slc22a18	-0.984693	2.66736	0.0265291	0.143112
Paqr7	-0.984488	5.98422	2.87625e-05	0.00485226
Gm7266	-0.98336	3.275	0.0124819	0.0930775
Gm45855	-0.982116	1.29388	0.0146007	0.10197
Dhrs3	-0.98029	6.40824	0.000136828	0.00905742
Faah	-0.97971	4.33062	0.00698075	0.0665607
Snx33	-0.97609	3.79788	0.00460793	0.0528306
Azin2	-0.974043	2.49754	0.0264572	0.143058
Rps12-ps9	-0.972196	0.465729	0.0486897	0.198966
Mief2	-0.971756	3.63524	0.00294776	0.0409715
Zfp551	-0.97143	1.40756	0.0417193	0.181979
Rtl8c	-0.970602	2.73176	0.00520724	0.056402
Cand2	-0.966583	6.01674	0.000361026	0.0145202
Nynrin	-0.966313	5.81028	0.00509227	0.0555987
Gm20559	-0.964608	1.39933	0.0187576	0.117597
Car2	-0.960979	9.78716	1.95964e-06	0.00220735
Mecom	-0.959888	4.13673	0.00762635	0.0699127
Pheta1	-0.959714	3.85176	0.0155891	0.105825
Rec8	-0.959082	2.72885	0.00707918	0.0668877
Gm15564	-0.958462	5.72493	0.0229968	0.131963
Rps19-ps6	-0.955222	4.89151	0.00716315	0.067427
Cyb561	-0.95325	2.75336	0.0224843	0.130622
Kbtbd7	-0.952407	3.97527	0.00238837	0.036803
Eps8	-0.951972	3.92175	0.0125995	0.0935778
Slc39a1	-0.949954	0.904297	0.0426127	0.183783
Mars2	-0.948015	4.14443	0.00372738	0.0467856
Gm6520	-0.94634	2.1449	0.017046	0.111663
Ccl27a	-0.94573	1.83774	0.0248676	0.137997
Ccl27a	-0.94573	1.83774	0.0248676	0.137997
Ccl27a	-0.94573	1.83774	0.0248676	0.137997
Ccl27a	-0.94573	1.83774	0.0248676	0.137997
Coq10b	-0.944779	3.00084	0.0364805	0.169062
Slc29a2	-0.94163	3.13795	0.0163264	0.108983
Prdm16	-0.939168	2.86511	0.0206674	0.124177
Nipsnap2	-0.938792	5.66382	5.8697e-05	0.00591065
Pdlim2	-0.93217	5.13204	0.00130244	0.0270982
Tmem98	-0.931544	5.16507	0.00161635	0.0296381
Gm14597	-0.930901	1.09394	0.0431553	0.185502
Six5	-0.930412	3.16861	0.0149505	0.103412
Rps18-ps1	-0.929276	2.04364	0.0196897	0.121218
Tcf7l2	-0.928343	4.5927	0.00160501	0.0295656
Ccdc126	-0.92804	2.73082	0.0363073	0.168741
Rhobtb1	-0.924981	3.2095	0.041565	0.181794
Rpsa-ps1	-0.9247	1.11211	0.029537	0.151594
Gm8129	-0.923992	2.93966	0.0205999	0.123828
Serinc5	-0.92022	5.19274	0.00138156	0.0279256
H2ac6	-0.918763	2.19924	0.0283746	0.148623
Ptgs1	-0.916635	5.55358	0.00178867	0.0315343
Klhl25	-0.914989	5.31808	0.00117122	0.0256633
Klk8	-0.914223	3.87332	0.00227893	0.0358827
Gm28437	-0.913078	5.0009	0.0206975	0.1243
Ctnnd1	-0.912884	2.27721	0.0146878	0.102467
Slc46a3	-0.911285	3.68562	0.00226488	0.0357917
Hmgcr	-0.911096	7.0099	0.0019294	0.0328909
Hdac6	-0.910151	5.96974	0.00470427	0.0534029
Sesn1	-0.908777	7.53314	3.04614e-06	0.00231002
Dhcr7	-0.908128	6.15432	0.000198292	0.0110195
Rcan3	-0.906175	4.78508	0.0204958	0.12366
Fam43a	-0.905721	4.77726	0.00123477	0.0262945
H2-Ob	-0.901679	5.41257	0.00501008	0.0552001
AC113595.1	-0.901248	1.04425	0.022352	0.130359
Rmdn1	-0.900782	2.79307	0.0105879	0.0848467
Tmem154	-0.896475	3.86544	0.00176988	0.0313423
Rnf122	-0.896382	4.41916	0.00367198	0.0465357
mt-Co3	-0.894673	5.13326	0.023721	0.133972
Kcnk5	-0.890138	4.63126	0.0080163	0.0716115
Ccdc102a	-0.88946	1.95005	0.0134616	0.0972563
Fgfbp3	-0.889389	3.0288	0.0359927	0.168264
Mn1	-0.886879	3.04271	0.0332463	0.16187
Sstr2	-0.886359	3.41078	0.0425424	0.183597
Lars2	-0.88597	9.88397	0.0343553	0.165026
Phlda2	-0.885758	1.8939	0.0179708	0.115235
Scarf1	-0.885756	5.2768	0.0345487	0.165035
Enpp5	-0.884083	5.33108	0.00219818	0.0352434
Rps15a	-0.883112	7.1856	0.000889758	0.0223558
Tmem9	-0.88249	6.31439	0.000155081	0.00973191
Maged2	-0.880255	4.86937	0.00451382	0.0520271
Epb41l4b	-0.879286	5.50022	0.00423024	0.0498646
Gtdc1	-0.879029	1.68671	0.0224425	0.130458
Trim21	-0.87689	5.48477	0.00411689	0.0491397
Pigp	-0.875438	4.77141	0.000822502	0.0215844
Zfp687	-0.87489	5.67011	0.00244156	0.0370945
1500009L16Rik	-0.874625	2.97275	0.0124475	0.0929802
Gm20300	-0.873695	1.75512	0.0495636	0.200883
Mfsd4b4	-0.872594	3.74009	0.0228215	0.131697
Galm	-0.87188	4.32595	0.00687729	0.0659306
Pard6b	-0.871486	2.53048	0.00979468	0.0811952
Gab1	-0.871286	4.72343	0.0049622	0.0550351
2410022M11Rik	-0.87027	2.29503	0.0305475	0.154342
Scn1b	-0.869424	2.74347	0.0381442	0.17222
Slc16a3	-0.869045	4.41825	0.0112118	0.0875773
Smpd1	-0.869021	6.13326	0.000503019	0.0164176
Cdkn3	-0.866628	3.568	0.00220471	0.0352434
Rilpl1	-0.866568	3.15704	0.0445662	0.189188
Rbm3-ps	-0.863777	2.56939	0.0251668	0.138956
Rpsa-ps12	-0.860871	1.51728	0.0330388	0.161222
Cavin3	-0.859644	3.48612	0.0457969	0.191904
Sqle	-0.859158	6.41245	0.000139988	0.00918404
Ltbp3	-0.859037	6.27547	0.0009953	0.0239268
Tnip3	-0.858371	3.92987	0.00565141	0.0592987
Trim47	-0.85789	6.33456	0.000779254	0.0210058
Wdr6	-0.856661	7.62647	0.00306342	0.0417127
Snhg8	-0.855262	2.50968	0.0189893	0.118364
Shisa5	-0.85454	8.23998	5.72913e-05	0.00585995
Dolk	-0.852453	5.01813	0.0014549	0.0284889
Nat8f1	-0.851557	2.5347	0.0127289	0.0940548
Tmem203	-0.850919	1.68569	0.0268528	0.144319
Ube2l6	-0.850796	7.07729	0.000122941	0.00877472
Xylb	-0.850527	2.85987	0.0269632	0.144756
Zfp579	-0.848095	3.46889	0.00667835	0.0644994
Mpzl1	-0.846296	3.75048	0.00402221	0.0486033
Prdx4	-0.845284	5.80938	0.000223209	0.0115059
Rpl13a-ps1	-0.844764	2.23369	0.0374854	0.170806
Foxd2	-0.844388	3.30475	0.0273076	0.145678
AW549877	-0.844061	4.58611	0.0137647	0.0986287
Krt18	-0.843641	6.05275	0.000473484	0.0161009
Grcc10	-0.839511	2.78004	0.0103026	0.0834254
Rps18-ps5	-0.836587	4.98193	0.0133635	0.0970501
Ddb2	-0.836039	2.50643	0.0126583	0.0937997
Ebpl	-0.835879	4.77445	0.00181159	0.0318439
Ctsf	-0.834676	5.03787	0.0229099	0.13196
H2bc21	-0.833225	3.1071	0.0129661	0.0953196
Prmt2	-0.83198	4.15684	0.0028909	0.0404463
Pim2	-0.82933	5.02298	0.00805306	0.071847
Calcrl	-0.828643	6.56921	0.000264254	0.0123034
Hint2	-0.827682	6.21777	0.000296941	0.0131647
Rpl18-ps1	-0.826428	4.32908	0.00340668	0.0448357
Cenpb	-0.825055	5.32229	0.000449492	0.0155801
Gata3	-0.824319	2.96961	0.048867	0.199077
H2ac13	-0.823583	1.04127	0.0426653	0.183944
Gm48226	-0.821467	3.99047	0.00475592	0.0536279
Rsl1	-0.82128	3.24934	0.0181206	0.115565
Fads3	-0.820521	2.78756	0.0221975	0.129827
Tle6	-0.820284	4.85003	0.00171008	0.0306406
F2r	-0.820245	6.73821	0.0446044	0.189288
Gstm2	-0.819193	2.74316	0.0252565	0.139154
Rnf217	-0.818282	2.73136	0.0215625	0.127471
Flywch2	-0.815977	2.14673	0.0192499	0.119494
Tspan13	-0.814648	8.37704	6.65974e-05	0.00626884
Hint3	-0.814524	3.27553	0.0161932	0.108341
Hmgcs1	-0.814228	5.28606	0.00702274	0.0666448
Ephb6	-0.81408	4.61125	0.0191303	0.118957
Adgrl4	-0.812842	9.07011	4.63862e-05	0.00557923
Ier3	-0.812506	4.0449	0.0039971	0.0485307
Slc27a1	-0.811568	5.98271	0.000112122	0.00834891
Hnmt	-0.811411	4.00292	0.00155751	0.0291108
Plpp2	-0.810914	4.73604	0.00125743	0.026643
Tmem80	-0.810627	3.76186	0.0278579	0.147163
Gm12250	-0.808971	4.19661	0.00949827	0.0799592
Aqp9	-0.808038	5.43203	0.000228106	0.0115746
Fbxo32	-0.807929	3.65973	0.00509334	0.0555987
Rpl36-ps2	-0.807585	3.15396	0.0286426	0.149233
Abcg1	-0.80692	5.98792	0.00656984	0.063935
Rps14	-0.805844	9.71554	1.73111e-05	0.0034707
Pkn3	-0.805318	3.77699	0.0338354	0.163513
Rbm3	-0.804993	7.61327	0.000499269	0.0164176
Rpl32l	-0.802824	3.87984	0.045174	0.190009
Gm7434	-0.800338	3.23818	0.0330511	0.161222
Kank3	-0.800281	3.43338	0.0149717	0.103503
Mettl27	-0.799932	3.97941	0.0109796	0.0863872
Afp	-0.799202	2.52519	0.0257795	0.140704
Slc7a4	-0.797058	4.68882	0.0107583	0.0851621
Wfdc17	-0.795615	5.23951	0.0226003	0.130945
B3galt4	-0.793184	3.98445	0.00675012	0.0650476
Batf2	-0.793063	3.1654	0.0475643	0.195843
Rdh12	-0.79304	3.70051	0.0161067	0.108051
Ctxn1	-0.788949	3.00751	0.0166998	0.110285
Selenbp2	-0.788358	2.19945	0.021569	0.127471
Magee1	-0.787505	3.50299	0.0167363	0.11047
Btg2	-0.786783	4.68132	0.00134557	0.0274394
Osbpl5	-0.785582	4.95692	0.0235396	0.133498
Fam83d	-0.78201	3.6421	0.0337715	0.163325
Gm12918	-0.78168	2.15972	0.0372265	0.170779
H2-T22	-0.781597	5.74922	0.000492633	0.0163684
H2-T22	-0.781597	5.74922	0.000492633	0.0163684
Bcas3	-0.781573	6.05844	0.000388161	0.0148994
Gpr171	-0.781212	6.85652	4.25137e-05	0.005566
Hyi	-0.780313	3.84158	0.00470602	0.0534029
Rab11fip5	-0.778738	5.26326	0.00531477	0.0571041
Ifi47	-0.777394	7.72131	1.74578e-05	0.0034707
Gm26510	-0.777285	2.52452	0.0229479	0.131963
Rpl13-ps3	-0.776816	2.14213	0.0275407	0.146245
Rpsa-ps9	-0.776196	3.22258	0.0107504	0.085151
Cnrip1	-0.77564	3.03533	0.0242288	0.135894
Rabac1	-0.775515	7.56393	1.27426e-05	0.00310592
Gm5879	-0.775064	3.58335	0.00971831	0.080878
Ctnnal1	-0.773334	3.66523	0.0410278	0.180356
Dhrs13	-0.77175	4.20172	0.0373154	0.170784
Uba7	-0.771101	7.13733	4.45888e-05	0.005566
Cryz	-0.769771	3.09573	0.0472788	0.195378
Pgghg	-0.769175	5.15603	0.00101915	0.024206
Ric8a	-0.768635	7.17147	2.28574e-05	0.00418193
Inafm1	-0.768213	4.76784	0.00154139	0.0289763
Ldlrad4	-0.768132	3.31509	0.00807088	0.0719072
Ccdc28a	-0.768103	3.64388	0.0113408	0.0881694
Aldh1a1	-0.767849	5.02783	0.0358886	0.168218
Dram2	-0.767438	4.77081	0.00547331	0.0579921
Ubc	-0.767244	8.02903	4.33853e-05	0.005566
Gm45660	-0.767016	2.8957	0.0374252	0.170784
Ecm1	-0.763296	4.53267	0.00837262	0.0735283
Gm5781	-0.762696	2.89958	0.026189	0.142007
Rnf180	-0.761743	4.14723	0.00325801	0.0436692
Rpl18a-ps1	-0.761518	3.36721	0.0290281	0.149983
Rhof	-0.760626	4.78685	0.0119587	0.0909505
Zscan20	-0.759914	2.83399	0.0382774	0.172235
Snn	-0.759092	3.89266	0.0179488	0.115195
F8a	-0.757834	5.02526	0.00220848	0.0352434
Gtpbp3	-0.757441	4.39319	0.00202467	0.0338052
Sdsl	-0.755267	7.04505	6.45706e-05	0.00612243
Rpl37rt	-0.754445	5.44088	0.0381079	0.17222
Cdkn1b	-0.754145	2.64583	0.0275871	0.146271
Rps18	-0.754126	9.2456	3.23595e-05	0.00504404
Laptm4b	-0.753901	5.84545	0.00313019	0.0423553
Nudt22	-0.753769	4.0805	0.0039285	0.0481864
9930012K11Rik	-0.752378	3.59549	0.0133894	0.0970584
Thsd1	-0.751366	5.54997	0.0251542	0.138956
Tmem71	-0.74992	4.84852	0.00235916	0.0366573
Gsta4	-0.74969	2.22371	0.0359973	0.168264
Scd2	-0.749551	8.50016	1.15994e-05	0.00310592
Ndrg1	-0.747483	7.47003	0.000608369	0.0183784
Aacs	-0.746748	6.6959	0.00112452	0.0253555
Rpl10a-ps1	-0.746083	4.52175	0.0315684	0.157478
Fam110a	-0.745979	5.23885	0.00144988	0.0284889
Gm7536	-0.744874	2.55127	0.0305334	0.15433
Ctso	-0.744676	5.96835	0.000399645	0.0149136
Selenbp1	-0.742771	6.31048	0.0016838	0.0303785
Pnrc1	-0.742724	7.55004	5.50214e-05	0.00571902
Rps16-ps2	-0.741995	5.27009	0.0270428	0.14498
S1pr1	-0.741907	4.84397	0.025648	0.1404
Gimap6	-0.741261	6.62205	0.000996489	0.0239268
Dusp28	-0.740477	3.68656	0.011356	0.0881694
1110051M20Rik	-0.740396	4.97602	0.00108643	0.0248903
Inka1	-0.740092	6.86178	0.000325363	0.0139028
Arntl	-0.739164	3.87863	0.00599946	0.0612116
Epm2aip1	-0.735825	4.23912	0.0250958	0.138899
Gm43305	-0.735655	4.11222	0.0499779	0.201995
Rpl32	-0.735464	9.47326	0.000211133	0.0111959
Rps27	-0.73523	7.15954	0.000696254	0.0197475
Gbe1	-0.73436	5.86576	0.000186494	0.0107669
Tnfrsf18	-0.733849	4.42373	0.0112472	0.0878015
Lrfn1	-0.731585	3.80688	0.0216795	0.12795
Spata6	-0.731487	4.45945	0.00352764	0.0456685
Retreg1	-0.731384	5.717	0.00253655	0.037571
Rps3a1	-0.7306	9.09357	5.86629e-05	0.00591065
Mepce	-0.728271	5.00494	0.0110531	0.0868072
Gfod2	-0.725912	3.78917	0.0455108	0.191008
Pogz	-0.724709	4.96566	0.00371472	0.0467579
Tomm40l	-0.72352	3.66332	0.00729933	0.0683129
Tbc1d25	-0.722983	5.11462	0.0130401	0.0956384
Hps6	-0.722466	4.88349	0.016522	0.109576
2410006H16Rik	-0.71953	4.21417	0.0155669	0.105825
Sec22a	-0.719422	5.175	0.00117104	0.0256633
Naprt	-0.71806	4.40428	0.0275152	0.146245
Mettl23	-0.718053	4.91589	0.00233644	0.0365353
Txnrd3	-0.717798	4.95114	0.0155928	0.105825
Dnpep	-0.717017	6.83039	0.000149547	0.00956955
Decr1	-0.716434	5.69327	0.00250603	0.03738
Neurl3	-0.71514	6.12932	0.000224497	0.0115265
Gfi1b	-0.713663	6.21614	0.00258617	0.0378315
Sertad1	-0.71266	4.72905	0.00591098	0.0606506
Utp14b	-0.712034	1.66175	0.048819	0.199077
Ilvbl	-0.711066	6.19365	0.000245953	0.0117894
Cers4	-0.709967	5.05409	0.011626	0.0895738
Il11ra2	-0.709563	1.73087	0.0481835	0.197633
Crlf2	-0.709269	6.76295	0.000102402	0.007871
Tbcd	-0.708356	7.19611	0.000619392	0.0184311
Tle1	-0.70798	4.64939	0.019747	0.121455
Trp53inp1	-0.706734	4.82427	0.0193155	0.119677
Rps12	-0.70616	7.10633	0.007039	0.0666448
Ldhb	-0.705243	5.6558	0.00245574	0.0371363
Mfsd3	-0.704486	4.04743	0.0139703	0.0995471
H1f10	-0.703518	4.83759	0.0038745	0.0477512
Telo2	-0.703445	5.98244	0.00307424	0.0418161
Fahd2a	-0.702898	4.53839	0.00249533	0.0373007
Dusp2	-0.702607	5.68158	0.0275602	0.146245
Acsf2	-0.702555	4.73733	0.00271046	0.0389048
Tbxas1	-0.702515	6.43243	0.00195248	0.0331263
Oasl2	-0.700993	5.82401	0.0033838	0.0446703
Gm15710	-0.700769	6.26062	0.0122456	0.0920016
Tnks1bp1	-0.699699	3.62825	0.0226199	0.130997
Aar2	-0.698425	6.5217	0.000200222	0.0110195
Vmac	-0.698174	4.42177	0.0030406	0.0416397
Mfge8	-0.697767	7.99085	5.44762e-05	0.00571902
Tep1	-0.69695	4.76762	0.0117278	0.0898256
AI467606	-0.696066	7.01745	0.000588324	0.0179819
Tecpr1	-0.695331	5.32447	0.0142641	0.100866
Arf5	-0.694352	7.82967	4.58477e-05	0.005566
Tmem263	-0.693955	4.80419	0.00165099	0.0300369
Icam1	-0.693651	5.81865	0.00185491	0.0323426
Zfp773	-0.692521	4.04844	0.0344632	0.165035
Klhl9	-0.692202	5.83043	0.00677991	0.0651921
Prkch	-0.692007	6.46167	0.00111941	0.0253329
Idi1	-0.690859	4.30335	0.0397187	0.176513
Pigx	-0.688981	6.22266	0.000988442	0.0238216
Plscr4	-0.688604	3.69878	0.0402652	0.177827
1700037C18Rik	-0.687636	1.82706	0.0395103	0.175947
Gm6035	-0.68705	2.44673	0.0389249	0.174106
Susd3	-0.686199	4.6025	0.016501	0.109529
Ptpn18	-0.685284	5.11371	0.00284232	0.0399701
Gm6394	-0.684702	3.01842	0.0483027	0.197934
Rpl3-ps1	-0.684327	5.84491	0.0324256	0.159599
Dennd1c	-0.683104	5.11435	0.0108378	0.0855826
Pafah1b3	-0.683048	5.35627	0.00217934	0.0351116
Jak3	-0.682366	8.16431	0.00347729	0.0452977
Mcoln2	-0.681837	5.00412	0.023647	0.13366
Chpf2	-0.68156	5.69215	0.00308896	0.0419285
2810013P06Rik	-0.680687	3.86388	0.020577	0.123805
Mansc1	-0.680246	3.87454	0.0106977	0.0850298
Pink1	-0.677943	7.90423	0.00148599	0.0285032
Actb	-0.67687	10.6007	0.000104934	0.0079713
Mgat1	-0.676849	8.69716	0.000675384	0.0193493
Repin1	-0.676839	6.84902	0.00634054	0.0630801
H2-T23	-0.67608	8.14864	3.14808e-05	0.00502678
Zfp358	-0.674368	5.82863	0.00224647	0.0356308
Gm5075	-0.674166	2.06063	0.0436024	0.186653
Ggh	-0.67379	5.12413	0.00360784	0.0461732
Dhx34	-0.673686	5.56265	0.0174779	0.113536
Smim4	-0.673409	4.5048	0.0291907	0.150471
Trp53i13	-0.673331	5.33061	0.000909422	0.0225017
Dcxr	-0.673114	4.50546	0.00411772	0.0491397
Abhd8	-0.672262	6.1922	0.00147443	0.0284889
Tmem243	-0.672029	3.37876	0.036237	0.168709
Hgsnat	-0.671011	5.79637	0.000404616	0.0149136
Kptn	-0.670492	4.99136	0.00128373	0.0268097
Nab2	-0.669941	3.50892	0.0474078	0.195559
Eva1b	-0.668845	2.9744	0.0178124	0.114716
Ube2e2	-0.668748	3.63453	0.0244572	0.136496
Casz1	-0.667308	3.35835	0.0231928	0.132428
Rab10os	-0.667108	5.68324	0.00400614	0.0485446
Abcg2	-0.664805	6.09124	0.000586072	0.0179819
Akap7	-0.663453	2.86772	0.0409042	0.179934
2810025M15Rik	-0.660447	4.78905	0.00604933	0.0612955
Adgrg1	-0.65976	11.1617	0.028958	0.149884
Gm9843	-0.659485	4.9112	0.0431186	0.185467
Tcta	-0.659313	4.2697	0.00815606	0.0725169
Ggt5	-0.658979	4.10476	0.0363828	0.16885
H2-Q7	-0.658843	8.05673	0.00037672	0.0147825
H2-Q7	-0.658843	8.05673	0.00037672	0.0147825
Cd81	-0.658412	8.4979	0.000104636	0.0079713
Rps19	-0.656672	9.70249	1.09591e-05	0.00305887
Rrad	-0.65611	3.80255	0.0258693	0.141135
Rps19-ps2	-0.655625	5.24591	0.00600811	0.0612121
Fbxl5	-0.655373	6.23511	0.00165638	0.0300507
Fbxo6	-0.65523	5.82912	0.00139669	0.0280418
Dennd3	-0.654776	4.29825	0.0345382	0.165035
Rps19-ps1	-0.653933	5.24172	0.00621979	0.0624223
Rps3	-0.653501	9.75883	0.000177307	0.0104218
Adnp2	-0.653426	5.78914	0.0121625	0.0917085
Siah1a	-0.65314	5.2134	0.00635811	0.0631747
Tmem130	-0.65307	3.15683	0.0422365	0.183279
Rps5	-0.652554	9.09201	0.000162512	0.00991092
Slc35f5	-0.651994	5.22006	0.00238811	0.036803
Kyat1	-0.65177	3.75576	0.0213279	0.126713
Tmem35b	-0.649269	4.84694	0.00858463	0.0747415
Ubxn6	-0.649121	3.30003	0.021873	0.128655
Itprip	-0.648405	6.61256	0.00784279	0.0711437
Trip6	-0.648263	5.37307	0.00648844	0.0638076
Rpl13-ps6	-0.643605	3.73853	0.0496952	0.201354
Rps20	-0.643492	7.55019	0.00212357	0.0346709
Nudt14	-0.643453	5.67667	0.000627885	0.0184612
Ypel5	-0.643069	5.51397	0.00364148	0.0463754
Ociad2	-0.643015	4.98629	0.0289311	0.149884
Gm7600	-0.642793	2.9173	0.0469768	0.19465
Ptp4a3	-0.642018	7.76541	0.000579669	0.0179283
Paqr8	-0.64147	4.71376	0.0498867	0.201752
Vldlr	-0.640882	4.58912	0.0120113	0.091137
Akr1c13	-0.64051	6.04414	0.00504625	0.0554106
Tal1	-0.639228	4.68114	0.0274971	0.146245
Rplp0	-0.638964	10.7009	0.000102113	0.007871
Tuba1a	-0.638725	6.45884	0.000241808	0.011782
Naxe	-0.638423	6.86647	0.000201625	0.0110195
Smim7	-0.636492	6.63397	0.00330429	0.0440685
Tgm2	-0.635651	4.6746	0.0429216	0.184926
Tspyl1	-0.635004	6.97816	0.000639833	0.0185938
Lrig2	-0.634282	4.7288	0.0212132	0.126403
Slain1	-0.633873	5.12713	0.0450531	0.189911
Plpp6	-0.633463	4.48597	0.0171047	0.111822
Rpl34	-0.632319	7.22371	0.00359319	0.0461578
Rpl34	-0.632319	7.22371	0.00359319	0.0461578
Fgd3	-0.632065	3.28584	0.0323399	0.159547
Slc44a1	-0.629512	4.4481	0.0265621	0.143228
Eif3f	-0.627078	7.37045	0.000773823	0.0209653
Nfkbie	-0.62688	5.29174	0.00177099	0.0313423
Tmem185b	-0.626024	5.32529	0.004161	0.0494071
Slc18a2	-0.625636	6.52851	0.00470283	0.0534029
Atraid	-0.625459	6.21486	0.000914874	0.0225507
H2-DMa	-0.625355	7.99801	6.39295e-05	0.00612243
Qsox1	-0.623976	6.06523	0.00478719	0.0538206
Rpl9	-0.623626	8.37941	0.000596225	0.0181807
Ano10	-0.62329	5.31138	0.021827	0.128528
Rplp1	-0.623189	8.43728	0.00247399	0.0371586
Msrb3	-0.622615	3.75572	0.0343646	0.165026
Cstf2t	-0.620556	6.71721	0.00223874	0.0355517
Dgcr6	-0.619584	6.11898	0.00162967	0.0298161
Tram1	-0.61941	9.2545	4.5305e-05	0.005566
Tnfsf10	-0.619084	4.08542	0.0143717	0.101092
Pck2	-0.618944	7.00957	0.0101375	0.0827692
Rab33b	-0.618512	3.88588	0.0143798	0.101092
Ip6k1	-0.618336	7.00048	0.0038552	0.0475584
Il11ra1	-0.617301	6.75008	0.00119215	0.0258411
Cd24a	-0.617013	6.77966	0.00410962	0.0491397
Kbtbd4	-0.616781	4.51427	0.0169552	0.111457
Actr10	-0.616505	5.88671	0.00134419	0.0274394
Dpysl2	-0.615894	4.70902	0.0177015	0.114285
Slc9a9	-0.61561	4.67375	0.00460739	0.0528306
Phf13	-0.614355	4.60122	0.00913828	0.0780962
Zfp954	-0.613279	4.92188	0.00655393	0.063935
Capn2	-0.612562	5.52476	0.0164898	0.109529
Rps6-ps4	-0.612201	5.35716	0.00433919	0.0507692
Sigirr	-0.610896	6.24612	0.00624715	0.0625043
Mettl22	-0.609758	4.35717	0.0254996	0.140005
Mad2l1bp	-0.609579	5.346	0.00627979	0.0627014
Ift172	-0.609372	5.16478	0.00900617	0.0773745
Uap1l1	-0.609158	6.93106	0.00038298	0.0148505
S100a13	-0.609152	5.44734	0.00479849	0.0538741
Hacd4	-0.608457	4.38884	0.0280664	0.147964
Dipk1b	-0.60827	6.50447	0.00863423	0.0750727
Nfkbia	-0.608046	7.05539	0.000241007	0.011782
Plaat3	-0.607442	5.68786	0.0012157	0.0260593
Ccrl2	-0.607196	4.14522	0.0184033	0.116444
Serhl	-0.606342	2.40807	0.0454274	0.190848
Adck2	-0.606044	4.53749	0.0402745	0.177827
Naglu	-0.605823	6.57856	0.00138572	0.0279501
Mgst3	-0.60577	4.67727	0.00933161	0.0790468
Chp1	-0.605679	5.6494	0.0124321	0.0929248
Immp1l	-0.605221	5.58263	0.00509008	0.0555987
Fbxl8	-0.604982	3.75304	0.0315592	0.157478
Gsn	-0.603978	6.70807	0.0139457	0.0994261
Gm6192	-0.603399	4.00952	0.0347049	0.165357
Klhl15	-0.603263	3.43299	0.0269416	0.144736
Rnf11	-0.603087	5.78093	0.00161766	0.0296381
Grasp	-0.601989	3.56922	0.0296058	0.151866
Plek	-0.601886	7.92248	0.00206087	0.0341899
Gstt2	-0.60157	5.21612	0.00578232	0.0598632
Ubl7	-0.601525	6.81587	0.000763594	0.0208823
Tmem168	-0.601455	6.39309	0.000952854	0.0231343
Gbp2	-0.601325	4.99692	0.0158678	0.107021
Kdm5b	-0.600836	7.29353	0.00252369	0.037571
Gm15427	-0.600243	6.71024	0.0427054	0.184056
Cd53	-0.600019	8.10498	0.000817822	0.0215487
Rabl3	-0.598753	3.97987	0.0176678	0.114125
Acox1	-0.596742	6.25837	0.00133754	0.0274394
Zfand1	-0.59669	4.47853	0.0229536	0.131963
Rpsa	-0.596312	9.50508	0.0002698	0.0124722
Sytl4	-0.595764	4.19508	0.0488655	0.199077
Rab38	-0.595033	7.15221	0.000439837	0.0155645
Il10ra	-0.594878	5.01998	0.0121288	0.0916005
Slc35b2	-0.593682	7.75172	0.000198769	0.0110195
Wbp1	-0.593668	6.07552	0.00256086	0.0377222
Ints5	-0.592768	6.75431	0.0078792	0.0712907
Xrcc5	-0.591872	4.92459	0.0318523	0.158286
Rpl3-ps2	-0.589299	3.93518	0.0441059	0.188094
Csrnp1	-0.589088	4.7772	0.0286519	0.149233
Mccc2	-0.587312	5.51698	0.00798654	0.0714992
Pold4	-0.58716	2.87194	0.0417104	0.181979
Hcst	-0.58683	4.0871	0.0288113	0.149644
Sgsh	-0.58623	4.58871	0.0125678	0.093396
5730480H06Rik	-0.586206	3.88559	0.0265726	0.143228
Pcbp2	-0.585931	6.1994	0.00133201	0.0273779
Bloc1s3	-0.585566	3.70695	0.0366598	0.16957
Ypel3	-0.585175	6.75889	0.00142986	0.0283571

## Sheet: Up_2
Gene_Symbol	Fold_Change	Average_Expression	p-Value	Adjusted_ p-Value
Cp	4.20895	-0.489446	0.00113616	0.0253586
Mx1	4.00909	-0.340783	0.000757963	0.0208823
Shc4	3.73111	-0.54571	0.00663974	0.0643178
Spta1	3.34092	-0.200302	0.015654	0.106186
Gm48582	3.23243	-0.151169	0.0139872	0.0995696
Clec5a	3.01281	2.3138	0.000882656	0.0223493
Kcnj2	2.97864	0.910189	0.00967244	0.0807626
Hspa1b	2.89659	1.34345	0.00191425	0.0327185
Lcn2	2.88044	0.897809	0.00624184	0.0625043
Snhg17	2.81214	2.19301	0.000332337	0.0140164
Sptb	2.80483	-0.590308	0.019322	0.119677
Poln	2.70635	-0.230985	0.00651339	0.0638076
BE692007	2.69357	0.305876	0.00656109	0.063935
Gm4759	2.66289	3.55335	3.64015e-05	0.00534328
Vps13c	2.65267	2.52662	0.00497592	0.0550351
Polq	2.57301	2.22482	0.00120154	0.0258411
Bhlha15	2.512	-0.546957	0.0441459	0.188203
Cep290	2.51077	1.42607	0.000486629	0.016292
Chd7	2.49022	1.97311	0.000407016	0.0149136
Mtus1	2.45308	3.02707	3.62508e-06	0.00239278
Gcc2	2.41106	3.30544	0.000243871	0.0117894
Ermap	2.41011	3.7402	0.00132736	0.0273689
Daam1	2.4065	1.76723	0.00182081	0.0319627
Gm20008	2.4064	1.50875	0.00584374	0.0602462
Plekha7	2.37211	2.81516	0.00291572	0.0406823
Zfp995	2.32017	0.252718	0.037255	0.170779
Ccdc18	2.30354	2.44726	0.00039393	0.0149136
D030028A08Rik	2.29219	3.89783	1.43199e-05	0.00320716
Igsf6	2.27789	4.77843	4.75403e-06	0.00239278
Papss2	2.27707	2.32758	0.000930793	0.0227963
Bdp1	2.22057	3.59967	7.83001e-06	0.00264496
Kcnq1ot1	2.2139	2.16635	0.000649681	0.0187959
Mgl2	2.20916	0.425751	0.00476803	0.0537179
Cenpe	2.20619	4.62832	8.42747e-05	0.00719952
Spire1	2.18917	3.49487	0.00654617	0.063935
Gm16758	2.18411	0.705846	0.0183744	0.116374
Gas7	2.15793	1.45554	0.0277031	0.146643
Paqr9	2.11182	-0.180552	0.0331223	0.161509
Slfn10-ps	2.10968	2.85726	0.00280327	0.0398408
Cenpf	2.1042	4.64328	1.29738e-05	0.00310592
Cyp27a1	2.10155	1.37891	0.034524	0.165035
Zfp40	2.08886	1.63507	0.000358855	0.0145202
Slc6a8	2.0867	0.572113	0.0282575	0.148227
Smc4	2.08663	6.37956	2.90496e-06	0.00231002
Ptar1	2.06383	2.15012	7.95577e-05	0.0071787
Fos	2.05119	4.41028	3.30895e-05	0.00505686
Gm20939	2.0367	0.0755576	0.0112849	0.0878844
Pyroxd2	2.03165	0.731419	0.00665954	0.064406
1810026B05Rik	2.01979	2.58707	0.000151812	0.00961967
Kif20b	2.01077	4.89806	1.10675e-05	0.00305887
Sgms2	1.99793	1.59474	0.00222225	0.0354196
Tpr	1.99222	6.58347	6.21682e-06	0.00260505
Casp8ap2	1.98562	4.85321	6.80855e-06	0.00264496
Eif5b	1.98515	5.10239	5.25271e-05	0.00568606
Cntln	1.97713	4.02667	6.36115e-05	0.00612243
Myh10	1.95973	2.04045	0.0135559	0.0975885
Snhg5	1.94958	2.58024	0.000398706	0.0149136
Cep83	1.94831	3.88351	0.00184841	0.0322726
Plcb4	1.92619	3.0984	0.0211979	0.12637
Cep128	1.92275	5.46575	5.40856e-05	0.00571902
Akap9	1.92158	5.06126	3.20096e-06	0.00231002
Catsper2	1.90561	-0.574965	0.0423374	0.183303
Ifitm6	1.90424	0.226561	0.00950401	0.0799592
Eea1	1.90217	3.92653	0.000358735	0.0145202
Gm11914	1.89584	2.01871	0.0044014	0.0511017
Brca2	1.88719	4.10437	4.54074e-05	0.005566
Fancm	1.88611	2.90371	0.00126061	0.026643
Nin	1.87698	5.31724	6.70914e-06	0.00264496
C3	1.86596	4.75473	0.000449773	0.0155801
Cep350	1.86457	5.05927	2.20905e-06	0.00220735
Ulbp1	1.85252	2.76643	0.00258428	0.0378315
Gm12666	1.84295	-0.326689	0.0200857	0.12238
Ppig	1.83855	4.991	1.66217e-05	0.0034707
Tlr8	1.83794	0.501753	0.0280392	0.14788
Mbd5	1.81674	2.33538	0.0184717	0.116706
Gm49797	1.80155	0.475179	0.0188903	0.11803
9930111J21Rik1	1.80133	1.86564	0.00357536	0.0461211
Ccdc88a	1.79733	4.43701	3.6609e-05	0.00534328
Zfp729a	1.79203	1.82877	0.00138782	0.0279501
Cntrl	1.79183	5.52576	6.75979e-05	0.00631724
Cep162	1.76681	2.88235	0.000378704	0.0147825
Nipbl	1.76024	4.35018	0.000457628	0.0156849
Nfkbiz	1.75313	1.20062	0.0193915	0.11995
Gm3325	1.7505	1.76961	0.0189615	0.118306
Ttf1	1.7458	3.77574	0.00252836	0.037571
Cenpj	1.74371	2.93509	0.00453945	0.0522761
Ccdc173	1.7368	0.275779	0.0171632	0.112091
Gpr141	1.72691	1.62042	0.00352002	0.0456365
A630089N07Rik	1.72297	2.89957	0.000301039	0.0132847
Ankrd26	1.71971	2.9747	0.00302343	0.0415162
Hmgn5	1.71839	4.80002	0.00012675	0.00882149
Cebpe	1.71411	3.66407	0.000146478	0.00946643
Ankrd12	1.71019	4.03197	9.61624e-05	0.00766064
Lrmda	1.70904	3.26729	0.00471129	0.0534029
Cldn13	1.70482	2.019	0.0073682	0.0685132
Pmaip1	1.70309	1.18415	0.0130207	0.0956128
Knl1	1.70271	4.63159	8.24455e-05	0.0071877
9930111J21Rik2	1.70027	2.75615	0.00158204	0.0293212
Pcm1	1.70024	4.68657	7.94098e-06	0.00264496
Gbp7	1.69827	5.69708	0.000216869	0.0112685
Ptbp2	1.69463	2.26154	0.0106578	0.0849353
Spocd1	1.68896	-0.157606	0.0300738	0.15299
Kel	1.6833	1.87886	0.00156776	0.0292183
Rev3l	1.68307	3.791	0.000227011	0.0115746
Bod1l	1.67646	4.78316	0.000658079	0.0189544
Gm5843	1.67273	0.525893	0.0236501	0.13366
Mki67	1.67054	6.46924	1.26584e-05	0.00310592
Siglece	1.66984	1.30912	0.00126474	0.0266543
Qprt	1.66767	0.15968	0.019819	0.121725
Ifi209	1.66745	3.3168	0.000278606	0.0126668
Gm39469	1.65303	-0.0236021	0.0200574	0.122316
Ccar1	1.63579	6.94113	4.11522e-05	0.005566
Dkc1	1.62103	7.50275	5.58021e-06	0.00246182
Slc7a2	1.61972	2.02248	0.0482729	0.197875
Gdpd5	1.61906	0.494998	0.0418769	0.182483
Cep295	1.61145	3.18003	0.00166997	0.030213
Atp1b2	1.60831	3.6026	0.00146961	0.0284889
2610307P16Rik	1.60528	2.89221	0.00649054	0.0638076
Gm21188	1.60003	0.785283	0.044429	0.188852
Tfrc	1.59913	4.5794	0.000133509	0.00893959
Gpx3	1.59857	1.85397	0.0278083	0.147021
Cybb	1.59513	5.6913	0.0430566	0.185359
Trim2	1.59241	1.34762	0.0141501	0.100497
Kifc5b	1.59232	0.359547	0.00562887	0.0591099
Ift74	1.58988	2.50409	0.0055238	0.058242
Oas1b	1.58563	0.617676	0.0328583	0.160743
Zfp638	1.58357	5.59582	0.000101229	0.007871
Rbm41	1.5817	1.43365	0.00201573	0.0337675
Smc2	1.57444	6.08133	4.89348e-05	0.00559049
Smc6	1.56784	5.73424	4.09154e-06	0.00239278
Upf3b	1.56228	3.31684	0.000121195	0.0086979
Gm18913	1.55319	0.307192	0.00747334	0.0691936
Rpgrip1l	1.54967	2.85883	0.00475581	0.0536279
Plxdc1	1.54795	2.05383	0.0201329	0.122491
Esf1	1.54428	3.58171	0.000206946	0.0111545
Clec7a	1.53796	3.81181	0.0449597	0.189804
Rbbp8	1.53642	5.07665	0.000146102	0.00946643
Pdzph1	1.5327	-0.483018	0.0394525	0.17581
Prss50	1.52679	1.80279	0.0145031	0.101634
AI427809	1.5227	0.634513	0.0159895	0.107451
Fyco1	1.52251	3.77725	0.00332504	0.044209
Tdg-ps2	1.52246	3.2516	0.00025794	0.0121304
Atp8b4	1.51943	7.00705	3.35062e-07	0.00158093
Gen1	1.51582	2.903	0.00933338	0.0790468
Snhg15	1.51097	2.88764	0.00107574	0.0247325
Rock1	1.50319	5.73603	1.38209e-05	0.00318106
Cd2ap	1.49747	2.12095	0.00543694	0.0577953
Lca5	1.49587	1.35624	0.0277194	0.14667
Mmp19	1.49554	1.52486	0.00508599	0.0555987
Pou2f2	1.48907	3.47865	0.000620045	0.0184311
Atrx	1.48526	6.11758	3.26173e-05	0.00504404
Zfp408	1.48344	3.15413	0.00859884	0.0748151
2610005L07Rik	1.47982	2.41975	0.00131439	0.0272189
Il6ra	1.4741	3.94089	0.000175128	0.0103672
Reps2	1.47045	1.778	0.0214633	0.127077
Pik3r6	1.46931	2.50796	0.0198382	0.121728
9930104L06Rik	1.46926	3.2851	0.000905838	0.0224558
Prpf4b	1.46806	5.31479	0.000330984	0.0140164
Gm7809	1.46448	0.797509	0.0314026	0.157194
Gm32856	1.46404	0.904772	0.00487247	0.0543232
Golga4	1.46184	5.2787	5.16223e-05	0.00568606
Rad50	1.45956	6.25138	1.23993e-05	0.00310592
Zfp809	1.45922	3.57006	0.000327041	0.0139287
Map3k6	1.45828	4.4146	0.00104388	0.0243276
Esco1	1.45531	4.28302	0.000377815	0.0147825
Slfn9	1.45495	5.12432	0.000404168	0.0149136
Bptf	1.4535	4.27859	0.00115616	0.025487
Cplane1	1.4464	2.87698	0.0396074	0.176199
Thoc2l	1.44289	3.54651	0.00131589	0.0272189
Star	1.43691	-0.224795	0.0413125	0.181056
Anks3	1.43662	4.24453	0.00057445	0.0178519
Gm5141	1.43509	1.31301	0.0172465	0.112522
Tnrc6a	1.43447	3.35918	0.002184	0.0351116
6430548M08Rik	1.43173	1.60759	0.0380262	0.172051
Gm13136	1.42908	1.24067	0.00222564	0.0354302
Smim1	1.42801	1.68602	0.0315218	0.157427
Mphosph10	1.42668	5.31127	4.97346e-06	0.00239278
Macf1	1.42402	5.45822	0.000385395	0.0148704
Eif2ak2	1.41902	4.01836	0.00281806	0.0399636
Gm46430	1.41745	3.38977	0.00358534	0.0461578
Gadd45b	1.41565	3.09264	0.00165613	0.0300507
Ptpn7	1.41519	7.62487	8.33336e-06	0.00268846
Zfp518a	1.41518	3.83993	0.000365456	0.0145273
Mical2	1.41132	2.43306	0.0105015	0.0844674
Mical2	1.41132	2.43306	0.0105015	0.0844674
Nefh	1.4088	4.82726	0.000340656	0.0142746
Taf1a	1.40431	3.01063	0.0235652	0.133498
Atad5	1.40096	4.39027	0.000269091	0.0124722
Ceacam1	1.39107	3.19592	0.00701163	0.0666285
Mphosph9	1.3888	3.65556	0.00733767	0.068512
Upf2	1.38545	4.56645	0.000118758	0.00859961
Kif5b	1.37702	5.92656	0.000153319	0.009668
Pibf1	1.37542	3.29483	0.000505647	0.016462
Smg1	1.37298	4.56725	0.000836984	0.0217884
Pde3b	1.37248	4.31052	0.000273019	0.0125763
Ccdc77	1.3683	3.70818	0.000400016	0.0149136
Slf1	1.36712	3.82339	0.000866881	0.0222106
Tcf20	1.3668	1.71318	0.0243562	0.136152
Epb41l1	1.364	2.74937	0.037656	0.171092
Map3k14	1.36146	3.50093	0.000710788	0.0200285
Elane	1.36011	10.0264	2.71168e-05	0.00465806
Odr4	1.35788	4.60134	9.18537e-05	0.00755177
Cd55	1.35726	2.33973	0.0162307	0.108455
Zfp971	1.35379	1.44312	0.0226804	0.131175
[truncated: 841 more rows]

## Sheet: Down_3
Gene_Symbol	Fold_Change	Average_Expression	p-Value	Adjusted_ p-Value
[truncated: 874 more rows]

[truncated: 1 more sheets: Up_3]
